# Supplementary material
Source: publisher figshare collection journal article supplement (https://acs.figshare.com/ndownloader/files/3782626)
Supplement: Supplementary file 1 [file 3782626]

 
data_shelx
 
_audit_creation_method            SHELXL-2014
_chemical_name_systematic
;
 ?
;
_chemical_name_common             'Furopyrrole'
_chemical_melting_point           388
_chemical_formula_moiety          'C38 H45 N1 O12 S'
_chemical_formula_sum
 'C38 H45 N O12 S' 
_chemical_formula_weight          739.81

loop_
 _atom_type_symbol
 _atom_type_description
 _atom_type_scat_dispersion_real
 _atom_type_scat_dispersion_imag
 _atom_type_scat_source
 'C'  'C'   0.0033   0.0016
 'International Tables Vol C Tables 4.2.6.8 and 6.1.1.4'
 'H'  'H'   0.0000   0.0000
 'International Tables Vol C Tables 4.2.6.8 and 6.1.1.4'
 'N'  'N'   0.0061   0.0033
 'International Tables Vol C Tables 4.2.6.8 and 6.1.1.4'
 'O'  'O'   0.0106   0.0060
 'International Tables Vol C Tables 4.2.6.8 and 6.1.1.4'
 'S'  'S'   0.1246   0.1234
 'International Tables Vol C Tables 4.2.6.8 and 6.1.1.4'
 
_space_group_crystal_system       triclinic
_space_group_IT_number            2
_space_group_name_H-M_alt         'P -1'
_space_group_name_Hall            '-P 1'
 
_shelx_space_group_comment
;
The symmetry employed for this shelxl refinement is uniquely defined
by the following loop, which should always be used as a source of
symmetry information in preference to the above space-group names.
They are only intended as comments.
;
 
loop_
 _space_group_symop_operation_xyz
 'x, y, z'
 '-x, -y, -z'
 
_cell_length_a                    11.1990(4)
_cell_length_b                    12.1908(4)
_cell_length_c                    15.6001(5)
_cell_angle_alpha                 84.885(2)
_cell_angle_beta                  73.475(2)
_cell_angle_gamma                 67.0370(10)
_cell_volume                      1879.46(11)
_cell_formula_units_Z             2
_cell_measurement_temperature     293(2)
_cell_measurement_reflns_used     9238 
_cell_measurement_theta_min       2.7 
_cell_measurement_theta_max       28.4 
 
_exptl_crystal_description        block 
_exptl_crystal_colour             colourless 
_exptl_crystal_density_meas       1.31 
_exptl_crystal_density_method     'not measured'              
_exptl_crystal_density_diffrn     1.307          
_exptl_crystal_F_000              784
_exptl_transmission_factor_min    ?                                             
_exptl_transmission_factor_max    ?                                             
_exptl_crystal_size_max           0.32 
_exptl_crystal_size_mid           0.20 
_exptl_crystal_size_min           0.15 
_exptl_absorpt_coefficient_mu     0.150
_shelx_estimated_absorpt_T_min    ? 
_shelx_estimated_absorpt_T_max    ? 
_exptl_absorpt_correction_type    'empirical' 
_exptl_absorpt_correction_T_min   0.6563 
_exptl_absorpt_correction_T_max   0.7457 
_exptl_absorpt_process_details    'SADABS-2014/2'
 
_exptl_special_details
;
 ?
;
 
_diffrn_ambient_temperature       293(2)
_diffrn_radiation_wavelength      0.71073
_diffrn_radiation_type            MoK\a
_diffrn_source                    'fine-focus sealed tube'                       
_diffrn_measurement_device_type   ? 
_diffrn_measurement_method        ? 
_diffrn_detector_area_resol_mean  ? 
_diffrn_reflns_number             37678
_diffrn_reflns_av_unetI/netI      0.0431
_diffrn_reflns_av_R_equivalents   0.0463
_diffrn_reflns_limit_h_min        -14
_diffrn_reflns_limit_h_max        14
_diffrn_reflns_limit_k_min        -15
_diffrn_reflns_limit_k_max        16
_diffrn_reflns_limit_l_min        -20
_diffrn_reflns_limit_l_max        20
_diffrn_reflns_theta_min          2.725
_diffrn_reflns_theta_max          28.356
_diffrn_reflns_theta_full         25.242
_diffrn_measured_fraction_theta_max   0.985
_diffrn_measured_fraction_theta_full  0.999
_diffrn_reflns_Laue_measured_fraction_max    0.985
_diffrn_reflns_Laue_measured_fraction_full   0.999
_diffrn_reflns_point_group_measured_fraction_max   0.985
_diffrn_reflns_point_group_measured_fraction_full  0.999
_reflns_number_total              9238
_reflns_number_gt                 6620
_reflns_threshold_expression      'I > 2\s(I)'
_reflns_Friedel_coverage          0.000
_reflns_Friedel_fraction_max      .
_reflns_Friedel_fraction_full     .
 
_reflns_special_details
;
 Reflections were merged by SHELXL according to the crystal
 class for the calculation of statistics and refinement.
 
 _reflns_Friedel_fraction is defined as the number of unique
 Friedel pairs measured divided by the number that would be
 possible theoretically, ignoring centric projections and
 systematic absences.
;
 
_computing_data_collection        'APEX2 (Bruker, 2010)'
_computing_cell_refinement        'APEX2 (Bruker, 2010); SAINT (Bruker, 2009)'
_computing_data_reduction         'SAINT (Bruker, 2009);XPREP(Sheldrick,2008)'
_computing_structure_solution     'SHELXS-97 (Sheldrick, 2008)'
_computing_structure_refinement   'SHELXS-97 (Sheldrick, 1997)'
_computing_molecular_graphics     ?
_computing_publication_material   ?
 
_refine_special_details
;
 ?
;
_refine_ls_structure_factor_coef  Fsqd
_refine_ls_matrix_type            full
_refine_ls_weighting_scheme       calc
_refine_ls_weighting_details
'w=1/[\s^2^(Fo^2^)+(0.0568P)^2^+0.6807P] where P=(Fo^2^+2Fc^2^)/3'
_atom_sites_solution_primary      direct
_atom_sites_solution_secondary    difmap
_atom_sites_solution_hydrogens    geom
_refine_ls_hydrogen_treatment     constr
_refine_ls_extinction_method      none
_refine_ls_extinction_coef        .
_refine_ls_number_reflns          9238
_refine_ls_number_parameters      469
_refine_ls_number_restraints      0
_refine_ls_R_factor_all           0.0783
_refine_ls_R_factor_gt            0.0498
_refine_ls_wR_factor_ref          0.1291
_refine_ls_wR_factor_gt           0.1164
_refine_ls_goodness_of_fit_ref    1.024
_refine_ls_restrained_S_all       1.024
_refine_ls_shift/su_max           0.000
_refine_ls_shift/su_mean          0.000
 
loop_
 _atom_site_label
 _atom_site_type_symbol
 _atom_site_fract_x
 _atom_site_fract_y
 _atom_site_fract_z
 _atom_site_U_iso_or_equiv
 _atom_site_adp_type
 _atom_site_occupancy
 _atom_site_site_symmetry_order  
 _atom_site_calc_flag
 _atom_site_refinement_flags_posn
 _atom_site_refinement_flags_adp
 _atom_site_refinement_flags_occupancy
 _atom_site_disorder_assembly
 _atom_site_disorder_group
S1 S -0.28552(4) -0.31993(4) 0.93870(3) 0.03090(11) Uani 1 1 d . . . . .
O4 O 0.02911(11) -0.17300(11) 0.80210(9) 0.0348(3) Uani 1 1 d . . . . .
O12 O -0.00540(11) -0.26169(10) 0.65742(8) 0.0314(3) Uani 1 1 d . . . . .
O6 O -0.38198(12) -0.07484(10) 0.85032(9) 0.0384(3) Uani 1 1 d . . . . .
O7 O -0.22655(13) -0.26633(11) 0.98424(8) 0.0396(3) Uani 1 1 d . . . . .
O2 O 0.53169(13) -0.70517(13) 0.53419(9) 0.0476(4) Uani 1 1 d . . . . .
O1 O 0.36538(12) -0.66557(12) 0.69277(9) 0.0431(3) Uani 1 1 d . . . . .
O8 O -0.42884(12) -0.27710(11) 0.95813(9) 0.0400(3) Uani 1 1 d . . . . .
O11 O -0.19672(13) -0.08677(11) 0.67406(9) 0.0391(3) Uani 1 1 d . . . . .
O10 O -0.24854(14) -0.19888(13) 0.53830(10) 0.0487(4) Uani 1 1 d . . . . .
O3 O 0.04108(11) -0.35777(11) 0.83845(8) 0.0350(3) Uani 1 1 d . . . . .
N1 N -0.21709(13) -0.30764(12) 0.82980(9) 0.0278(3) Uani 1 1 d . . . . .
O5 O -0.22641(14) -0.01861(12) 0.87447(11) 0.0524(4) Uani 1 1 d . . . . .
O9 O -0.43546(13) -0.15541(13) 0.65242(11) 0.0531(4) Uani 1 1 d . . . . .
C21 C -0.16111(16) -0.21402(14) 0.80563(12) 0.0293(4) Uani 1 1 d . . . . .
C11 C -0.21852(16) -0.27750(15) 0.67757(12) 0.0300(4) Uani 1 1 d . . . . .
C32 C -0.22696(17) -0.47428(15) 0.95548(11) 0.0304(4) Uani 1 1 d . . . . .
C22 C -0.29771(16) -0.30716(15) 0.76810(12) 0.0296(4) Uani 1 1 d . . . . .
H22 H -0.3848 -0.2402 0.7864 0.036 Uiso 1 1 calc R U . . .
C33 C -0.09051(17) -0.54228(16) 0.93754(12) 0.0345(4) Uani 1 1 d . . . . .
H33 H -0.0279 -0.5065 0.9206 0.041 Uiso 1 1 calc R U . . .
C19 C 0.17328(17) -0.21274(17) 0.78938(13) 0.0379(4) Uani 1 1 d . . . . .
H19A H 0.2220 -0.2727 0.7417 0.046 Uiso 1 1 calc R U . . .
H19B H 0.1968 -0.2466 0.8438 0.046 Uiso 1 1 calc R U . . .
C9 C 0.01353(17) -0.34041(16) 0.58603(12) 0.0320(4) Uani 1 1 d . . . . .
H9 H 0.0031 -0.2955 0.5315 0.038 Uiso 1 1 calc R U . . .
C5 C 0.19206(17) -0.50516(16) 0.64058(12) 0.0322(4) Uani 1 1 d . . . . .
H5 H 0.1321 -0.4912 0.6974 0.039 Uiso 1 1 calc R U . . .
C10 C -0.10122(17) -0.38362(16) 0.62250(12) 0.0328(4) Uani 1 1 d . . . . .
H10A H -0.0753 -0.4520 0.6600 0.039 Uiso 1 1 calc R U . . .
H10B H -0.1264 -0.4059 0.5741 0.039 Uiso 1 1 calc R U . . .
C4 C 0.31838(17) -0.59386(16) 0.62753(12) 0.0334(4) Uani 1 1 d . . . . .
C18 C -0.02013(16) -0.25806(15) 0.82032(11) 0.0294(4) Uani 1 1 d . . . . .
C7 C 0.24263(18) -0.45650(17) 0.48596(12) 0.0369(4) Uani 1 1 d . . . . .
H7 H 0.2179 -0.4101 0.4385 0.044 Uiso 1 1 calc R U . . .
C3 C 0.40934(17) -0.61475(17) 0.54117(13) 0.0372(4) Uani 1 1 d . . . . .
C37 C -0.1409(2) -0.71941(17) 0.97025(13) 0.0394(4) Uani 1 1 d . . . . .
C8 C 0.15244(17) -0.43570(16) 0.56966(12) 0.0318(4) Uani 1 1 d . . . . .
C34 C -0.32031(18) -0.52661(17) 0.98462(14) 0.0404(4) Uani 1 1 d . . . . .
H34 H -0.4120 -0.4798 0.9994 0.048 Uiso 1 1 calc R U . . .
C12 C -0.14262(16) -0.20465(15) 0.70063(12) 0.0299(4) Uani 1 1 d . . . . .
C26 C -0.32528(18) -0.41938(16) 0.76929(12) 0.0336(4) Uani 1 1 d . . . . .
C23 C -0.25740(17) -0.09013(15) 0.84900(13) 0.0344(4) Uani 1 1 d . . . . .
C36 C -0.2768(2) -0.64861(18) 0.99161(14) 0.0442(5) Uani 1 1 d . . . . .
H36 H -0.3398 -0.6838 1.0110 0.053 Uiso 1 1 calc R U . . .
C13 C -0.31508(19) -0.20292(17) 0.62325(14) 0.0384(4) Uani 1 1 d . . . . .
C6 C 0.36996(19) -0.54612(18) 0.47195(12) 0.0404(4) Uani 1 1 d . . . . .
H6 H 0.4294 -0.5599 0.4149 0.048 Uiso 1 1 calc R U . . .
C27 C -0.2299(2) -0.53394(17) 0.76646(13) 0.0399(4) Uani 1 1 d . . . . .
H27 H -0.1423 -0.5457 0.7657 0.048 Uiso 1 1 calc R U . . .
C29 C -0.2642(3) -0.6317(2) 0.76479(15) 0.0546(6) Uani 1 1 d . . . . .
H29 H -0.1999 -0.7086 0.7630 0.066 Uiso 1 1 calc R U . . .
C35 C -0.04908(18) -0.66392(17) 0.94527(13) 0.0386(4) Uani 1 1 d . . . . .
H35 H 0.0426 -0.7102 0.9335 0.046 Uiso 1 1 calc R U . . .
C24 C -0.48746(18) 0.04141(16) 0.87778(16) 0.0452(5) Uani 1 1 d . . . . .
H24A H -0.4709 0.1016 0.8365 0.054 Uiso 1 1 calc R U . . .
H24B H -0.4921 0.0633 0.9373 0.054 Uiso 1 1 calc R U . . .
C28 C -0.4562(2) -0.4050(2) 0.77234(14) 0.0457(5) Uani 1 1 d . . . . .
H28 H -0.5221 -0.3286 0.7757 0.055 Uiso 1 1 calc R U . . .
C25 C -0.6154(2) 0.0299(2) 0.87689(18) 0.0578(6) Uani 1 1 d . . . . .
H25A H -0.6895 0.1048 0.8946 0.087 Uiso 1 1 calc R U . . .
H25B H -0.6088 0.0078 0.8177 0.087 Uiso 1 1 calc R U . . .
H25C H -0.6299 -0.0302 0.9178 0.087 Uiso 1 1 calc R U . . .
C1 C 0.2738(2) -0.6492(2) 0.77971(14) 0.0491(5) Uani 1 1 d . . . . .
H1A H 0.3174 -0.7040 0.8198 0.074 Uiso 1 1 calc R U . . .
H1B H 0.2457 -0.5691 0.8009 0.074 Uiso 1 1 calc R U . . .
H1C H 0.1965 -0.6636 0.7770 0.074 Uiso 1 1 calc R U . . .
C38 C -0.0923(3) -0.85316(19) 0.97332(17) 0.0583(6) Uani 1 1 d . . . . .
H38A H 0.0045 -0.8869 0.9565 0.087 Uiso 1 1 calc R U . . .
H38B H -0.1258 -0.8763 1.0329 0.087 Uiso 1 1 calc R U . . .
H38C H -0.1244 -0.8816 0.9326 0.087 Uiso 1 1 calc R U . . .
C20 C 0.2075(2) -0.10484(19) 0.76553(17) 0.0537(6) Uani 1 1 d . . . . .
H20A H 0.3025 -0.1268 0.7564 0.081 Uiso 1 1 calc R U . . .
H20B H 0.1836 -0.0723 0.7117 0.081 Uiso 1 1 calc R U . . .
H20C H 0.1584 -0.0463 0.8132 0.081 Uiso 1 1 calc R U . . .
C2 C 0.6234(2) -0.7296(2) 0.44668(15) 0.0544(6) Uani 1 1 d . . . . .
H2A H 0.7058 -0.7942 0.4490 0.082 Uiso 1 1 calc R U . . .
H2B H 0.5840 -0.7510 0.4069 0.082 Uiso 1 1 calc R U . . .
H2C H 0.6418 -0.6599 0.4254 0.082 Uiso 1 1 calc R U . . .
C30 C -0.4898(3) -0.5018(3) 0.77051(17) 0.0633(7) Uani 1 1 d . . . . .
H30 H -0.5776 -0.4906 0.7725 0.076 Uiso 1 1 calc R U . . .
C14 C -0.3271(3) -0.1268(2) 0.47956(18) 0.0683(8) Uani 1 1 d . . . . .
H14A H -0.3667 -0.0437 0.4987 0.082 Uiso 1 1 calc R U . . .
H14B H -0.3991 -0.1526 0.4803 0.082 Uiso 1 1 calc R U . . .
C16 C -0.1131(3) -0.0190(2) 0.65088(19) 0.0629(7) Uani 1 1 d . . . . .
H16A H -0.0273 -0.0652 0.6100 0.075 Uiso 1 1 calc R U . . .
H16B H -0.0962 0.0001 0.7042 0.075 Uiso 1 1 calc R U . . .
C31 C -0.3945(3) -0.6138(2) 0.76583(17) 0.0651(7) Uani 1 1 d . . . . .
H31 H -0.4170 -0.6790 0.7633 0.078 Uiso 1 1 calc R U . . .
C15 C -0.2332(4) -0.1425(3) 0.3880(2) 0.1031(12) Uani 1 1 d . . . . .
H15A H -0.2817 -0.0958 0.3469 0.155 Uiso 1 1 calc R U . . .
H15B H -0.1625 -0.1166 0.3883 0.155 Uiso 1 1 calc R U . . .
H15C H -0.1948 -0.2250 0.3699 0.155 Uiso 1 1 calc R U . . .
C17 C -0.1799(3) 0.0892(2) 0.6092(3) 0.0940(11) Uani 1 1 d . . . . .
H17A H -0.1242 0.1350 0.5936 0.141 Uiso 1 1 calc R U . . .
H17B H -0.1958 0.0698 0.5562 0.141 Uiso 1 1 calc R U . . .
H17C H -0.2644 0.1349 0.6501 0.141 Uiso 1 1 calc R U . . .
 
loop_
 _atom_site_aniso_label
 _atom_site_aniso_U_11
 _atom_site_aniso_U_22
 _atom_site_aniso_U_33
 _atom_site_aniso_U_23
 _atom_site_aniso_U_13
 _atom_site_aniso_U_12
S1 0.0266(2) 0.0313(2) 0.0331(2) -0.00314(17) -0.00382(17) -0.01158(17)
O4 0.0285(6) 0.0350(7) 0.0462(8) 0.0006(5) -0.0103(5) -0.0175(5)
O12 0.0278(6) 0.0337(6) 0.0359(7) -0.0009(5) -0.0075(5) -0.0155(5)
O6 0.0283(6) 0.0279(6) 0.0573(8) -0.0069(6) -0.0116(6) -0.0072(5)
O7 0.0444(7) 0.0417(7) 0.0357(7) -0.0079(6) -0.0077(6) -0.0199(6)
O2 0.0308(7) 0.0539(9) 0.0458(8) -0.0077(6) 0.0001(6) -0.0089(6)
O1 0.0336(7) 0.0455(8) 0.0403(8) 0.0065(6) -0.0057(6) -0.0091(6)
O8 0.0252(6) 0.0388(7) 0.0474(8) -0.0015(6) -0.0004(5) -0.0093(5)
O11 0.0411(7) 0.0282(6) 0.0526(8) 0.0092(6) -0.0183(6) -0.0159(5)
O10 0.0514(8) 0.0614(9) 0.0456(8) 0.0214(7) -0.0283(7) -0.0282(7)
O3 0.0301(6) 0.0366(7) 0.0402(7) 0.0055(5) -0.0110(5) -0.0148(5)
N1 0.0261(7) 0.0289(7) 0.0324(8) -0.0007(6) -0.0079(6) -0.0144(6)
O5 0.0410(8) 0.0380(8) 0.0823(11) -0.0197(7) -0.0147(7) -0.0163(6)
O9 0.0329(8) 0.0580(9) 0.0700(11) 0.0141(8) -0.0251(7) -0.0139(7)
C21 0.0266(8) 0.0265(8) 0.0378(10) -0.0003(7) -0.0085(7) -0.0133(7)
C11 0.0275(8) 0.0304(9) 0.0365(10) 0.0041(7) -0.0130(7) -0.0135(7)
C32 0.0291(8) 0.0332(9) 0.0291(9) 0.0011(7) -0.0068(7) -0.0129(7)
C22 0.0256(8) 0.0309(9) 0.0369(10) 0.0023(7) -0.0117(7) -0.0136(7)
C33 0.0293(9) 0.0392(10) 0.0377(10) 0.0041(8) -0.0099(7) -0.0159(8)
C19 0.0269(9) 0.0467(11) 0.0434(11) -0.0012(8) -0.0068(8) -0.0189(8)
C9 0.0353(9) 0.0367(9) 0.0280(9) 0.0036(7) -0.0107(7) -0.0172(8)
C5 0.0302(9) 0.0373(9) 0.0290(9) 0.0001(7) -0.0035(7) -0.0160(7)
C10 0.0323(9) 0.0355(9) 0.0359(10) -0.0006(7) -0.0115(7) -0.0167(7)
C4 0.0313(9) 0.0354(9) 0.0341(10) 0.0020(7) -0.0067(7) -0.0154(7)
C18 0.0283(8) 0.0331(9) 0.0287(9) -0.0017(7) -0.0056(7) -0.0148(7)
C7 0.0392(10) 0.0475(11) 0.0289(9) 0.0024(8) -0.0087(8) -0.0225(9)
C3 0.0293(9) 0.0419(10) 0.0396(10) -0.0088(8) -0.0014(8) -0.0162(8)
C37 0.0468(11) 0.0373(10) 0.0341(10) 0.0059(8) -0.0113(8) -0.0169(8)
C8 0.0322(9) 0.0367(9) 0.0304(9) -0.0006(7) -0.0068(7) -0.0180(7)
C34 0.0291(9) 0.0425(11) 0.0485(12) 0.0050(9) -0.0058(8) -0.0167(8)
C12 0.0268(8) 0.0275(8) 0.0386(10) 0.0040(7) -0.0114(7) -0.0126(7)
C26 0.0415(10) 0.0388(10) 0.0298(9) 0.0026(7) -0.0111(8) -0.0243(8)
C23 0.0317(9) 0.0307(9) 0.0421(10) -0.0021(8) -0.0096(8) -0.0129(7)
C36 0.0433(11) 0.0440(11) 0.0499(12) 0.0093(9) -0.0095(9) -0.0254(9)
C13 0.0398(11) 0.0373(10) 0.0481(12) 0.0095(8) -0.0217(9) -0.0200(8)
C6 0.0382(10) 0.0545(12) 0.0276(9) -0.0060(8) -0.0001(8) -0.0215(9)
C27 0.0517(11) 0.0389(10) 0.0347(10) 0.0020(8) -0.0123(9) -0.0230(9)
C29 0.0847(17) 0.0397(11) 0.0439(12) 0.0019(9) -0.0149(11) -0.0303(11)
C35 0.0317(9) 0.0406(10) 0.0389(10) 0.0031(8) -0.0096(8) -0.0094(8)
C24 0.0361(10) 0.0284(9) 0.0651(14) -0.0099(9) -0.0131(9) -0.0042(8)
C28 0.0453(11) 0.0585(13) 0.0478(12) 0.0079(10) -0.0159(9) -0.0341(10)
C25 0.0328(10) 0.0471(12) 0.0864(18) -0.0199(12) -0.0162(11) -0.0035(9)
C1 0.0431(11) 0.0550(13) 0.0395(11) 0.0138(9) -0.0066(9) -0.0146(10)
C38 0.0705(15) 0.0367(11) 0.0645(15) 0.0077(10) -0.0154(12) -0.0208(11)
C20 0.0393(11) 0.0531(13) 0.0734(16) -0.0040(11) -0.0045(10) -0.0289(10)
C2 0.0343(10) 0.0696(15) 0.0489(13) -0.0192(11) 0.0030(9) -0.0146(10)
C30 0.0711(16) 0.0804(18) 0.0673(16) 0.0074(13) -0.0222(13) -0.0579(15)
C14 0.0833(18) 0.0758(17) 0.0793(19) 0.0443(14) -0.0590(16) -0.0483(15)
C16 0.0633(15) 0.0449(13) 0.0873(19) 0.0239(12) -0.0190(13) -0.0337(11)
C31 0.097(2) 0.0712(17) 0.0610(15) 0.0063(12) -0.0237(14) -0.0663(16)
C15 0.147(3) 0.144(3) 0.077(2) 0.067(2) -0.068(2) -0.103(3)
C17 0.113(3) 0.0550(17) 0.135(3) 0.0455(18) -0.055(2) -0.0488(17)
 
_geom_special_details
;
 All esds (except the esd in the dihedral angle between two l.s. planes)
 are estimated using the full covariance matrix.  The cell esds are taken
 into account individually in the estimation of esds in distances, angles
 and torsion angles; correlations between esds in cell parameters are only
 used when they are defined by crystal symmetry.  An approximate (isotropic)
 treatment of cell esds is used for estimating esds involving l.s. planes.
;
 
loop_
 _geom_bond_atom_site_label_1
 _geom_bond_atom_site_label_2
 _geom_bond_distance
 _geom_bond_site_symmetry_2
 _geom_bond_publ_flag
S1 O8 1.4277(12) . ?
S1 O7 1.4332(13) . ?
S1 N1 1.6731(15) . ?
S1 C32 1.7567(18) . ?
O4 C18 1.328(2) . ?
O4 C19 1.451(2) . ?
O12 C12 1.4000(19) . ?
O12 C9 1.450(2) . ?
O6 C23 1.328(2) . ?
O6 C24 1.450(2) . ?
O2 C3 1.365(2) . ?
O2 C2 1.429(2) . ?
O1 C4 1.365(2) . ?
O1 C1 1.424(2) . ?
O11 C12 1.400(2) . ?
O11 C16 1.431(2) . ?
O10 C13 1.330(2) . ?
O10 C14 1.448(3) . ?
O3 C18 1.194(2) . ?
N1 C21 1.478(2) . ?
N1 C22 1.494(2) . ?
O5 C23 1.189(2) . ?
O9 C13 1.204(2) . ?
C21 C18 1.535(2) . ?
C21 C23 1.549(2) . ?
C21 C12 1.591(3) . ?
C11 C13 1.527(2) . ?
C11 C22 1.536(2) . ?
C11 C10 1.539(2) . ?
C11 C12 1.569(2) . ?
C32 C34 1.380(2) . ?
C32 C33 1.382(2) . ?
C22 C26 1.513(2) . ?
C33 C35 1.375(3) . ?
C19 C20 1.497(3) . ?
C9 C8 1.501(2) . ?
C9 C10 1.520(2) . ?
C5 C4 1.376(2) . ?
C5 C8 1.399(3) . ?
C4 C3 1.413(2) . ?
C7 C8 1.378(2) . ?
C7 C6 1.387(3) . ?
C3 C6 1.372(3) . ?
C37 C36 1.383(3) . ?
C37 C35 1.391(3) . ?
C37 C38 1.505(3) . ?
C34 C36 1.377(3) . ?
C26 C27 1.384(3) . ?
C26 C28 1.395(3) . ?
C27 C29 1.391(3) . ?
C29 C31 1.385(4) . ?
C24 C25 1.497(3) . ?
C28 C30 1.376(3) . ?
C30 C31 1.358(4) . ?
C14 C15 1.490(4) . ?
C16 C17 1.440(4) . ?
 
loop_
 _geom_angle_atom_site_label_1
 _geom_angle_atom_site_label_2
 _geom_angle_atom_site_label_3
 _geom_angle
 _geom_angle_site_symmetry_1
 _geom_angle_site_symmetry_3
 _geom_angle_publ_flag
O8 S1 O7 119.09(8) . . ?
O8 S1 N1 110.53(8) . . ?
O7 S1 N1 105.05(7) . . ?
O8 S1 C32 107.29(8) . . ?
O7 S1 C32 109.74(8) . . ?
N1 S1 C32 104.17(7) . . ?
C18 O4 C19 115.36(13) . . ?
C12 O12 C9 110.47(12) . . ?
C23 O6 C24 117.76(14) . . ?
C3 O2 C2 116.02(17) . . ?
C4 O1 C1 116.76(14) . . ?
C12 O11 C16 119.11(15) . . ?
C13 O10 C14 116.85(18) . . ?
C21 N1 C22 110.41(13) . . ?
C21 N1 S1 116.59(11) . . ?
C22 N1 S1 116.26(10) . . ?
N1 C21 C18 109.98(13) . . ?
N1 C21 C23 114.14(13) . . ?
C18 C21 C23 114.09(13) . . ?
N1 C21 C12 102.61(12) . . ?
C18 C21 C12 107.25(13) . . ?
C23 C21 C12 107.88(14) . . ?
C13 C11 C22 110.14(14) . . ?
C13 C11 C10 112.04(15) . . ?
C22 C11 C10 116.08(14) . . ?
C13 C11 C12 110.61(14) . . ?
C22 C11 C12 105.48(13) . . ?
C10 C11 C12 101.91(13) . . ?
C34 C32 C33 120.73(17) . . ?
C34 C32 S1 118.42(14) . . ?
C33 C32 S1 120.82(13) . . ?
N1 C22 C26 114.34(14) . . ?
N1 C22 C11 103.20(12) . . ?
C26 C22 C11 115.77(14) . . ?
C35 C33 C32 118.74(17) . . ?
O4 C19 C20 106.36(15) . . ?
O12 C9 C8 108.19(13) . . ?
O12 C9 C10 102.62(13) . . ?
C8 C9 C10 115.20(15) . . ?
C4 C5 C8 121.01(16) . . ?
C9 C10 C11 105.25(14) . . ?
O1 C4 C5 124.89(16) . . ?
O1 C4 C3 115.72(15) . . ?
C5 C4 C3 119.39(17) . . ?
O3 C18 O4 124.61(15) . . ?
O3 C18 C21 124.60(15) . . ?
O4 C18 C21 110.53(14) . . ?
C8 C7 C6 120.53(18) . . ?
O2 C3 C6 125.27(16) . . ?
O2 C3 C4 115.41(17) . . ?
C6 C3 C4 119.32(17) . . ?
C36 C37 C35 118.27(18) . . ?
C36 C37 C38 121.33(19) . . ?
C35 C37 C38 120.40(18) . . ?
C7 C8 C5 118.94(16) . . ?
C7 C8 C9 121.41(17) . . ?
C5 C8 C9 119.65(15) . . ?
C36 C34 C32 119.60(17) . . ?
O12 C12 O11 112.52(14) . . ?
O12 C12 C11 107.67(13) . . ?
O11 C12 C11 109.40(13) . . ?
O12 C12 C21 108.16(13) . . ?
O11 C12 C21 112.44(13) . . ?
C11 C12 C21 106.36(13) . . ?
C27 C26 C28 118.33(17) . . ?
C27 C26 C22 124.66(16) . . ?
C28 C26 C22 117.01(17) . . ?
O5 C23 O6 125.19(16) . . ?
O5 C23 C21 126.67(16) . . ?
O6 C23 C21 108.10(14) . . ?
C34 C36 C37 120.90(18) . . ?
O9 C13 O10 124.14(18) . . ?
O9 C13 C11 125.01(18) . . ?
O10 C13 C11 110.84(15) . . ?
C3 C6 C7 120.81(17) . . ?
C26 C27 C29 120.3(2) . . ?
C31 C29 C27 119.7(2) . . ?
C33 C35 C37 121.62(17) . . ?
O6 C24 C25 105.59(15) . . ?
C30 C28 C26 121.2(2) . . ?
C31 C30 C28 119.9(2) . . ?
O10 C14 C15 106.9(2) . . ?
O11 C16 C17 109.2(2) . . ?
C30 C31 C29 120.6(2) . . ?
 
_refine_diff_density_max    0.409
_refine_diff_density_min   -0.312
_refine_diff_density_rms    0.047

_shelxl_version_number 2014-3

_shelx_res_file
;
TITL PB10 new in P-1
CELL  0.71073  11.1990  12.1908  15.6001   84.885   73.475   67.037
ZERR     2.00   0.0004   0.0004   0.0005    0.002    0.002    0.001
LATT   1
SFAC  C    H    N    O    S
UNIT  76   90   2    24   2
MERG   2
FMAP   2
PLAN   25
ACTA
L.S.   10
WGHT    0.056800    0.680700
FVAR       0.17107
S1    5   -0.285516   -0.319933    0.938699    11.00000    0.02665    0.03132 =
         0.03312   -0.00314   -0.00382   -0.01158
O4    4    0.029114   -0.172999    0.802103    11.00000    0.02848    0.03504 =
         0.04615    0.00056   -0.01027   -0.01745
O12   4   -0.005396   -0.261695    0.657422    11.00000    0.02777    0.03367 =
         0.03594   -0.00095   -0.00747   -0.01552
O6    4   -0.381980   -0.074843    0.850324    11.00000    0.02828    0.02786 =
         0.05727   -0.00692   -0.01158   -0.00722
O7    4   -0.226545   -0.266334    0.984236    11.00000    0.04441    0.04175 =
         0.03572   -0.00790   -0.00775   -0.01995
O2    4    0.531695   -0.705170    0.534189    11.00000    0.03078    0.05391 =
         0.04578   -0.00771    0.00012   -0.00888
O1    4    0.365376   -0.665565    0.692774    11.00000    0.03363    0.04553 =
         0.04026    0.00646   -0.00572   -0.00912
O8    4   -0.428840   -0.277098    0.958127    11.00000    0.02520    0.03876 =
         0.04741   -0.00148   -0.00042   -0.00932
O11   4   -0.196716   -0.086770    0.674061    11.00000    0.04109    0.02815 =
         0.05257    0.00923   -0.01830   -0.01594
O10   4   -0.248535   -0.198880    0.538303    11.00000    0.05136    0.06143 =
         0.04560    0.02141   -0.02830   -0.02815
O3    4    0.041081   -0.357765    0.838447    11.00000    0.03012    0.03656 =
         0.04024    0.00549   -0.01098   -0.01476
N1    3   -0.217088   -0.307640    0.829800    11.00000    0.02614    0.02887 =
         0.03245   -0.00073   -0.00788   -0.01438
O5    4   -0.226411   -0.018614    0.874466    11.00000    0.04099    0.03797 =
         0.08233   -0.01967   -0.01467   -0.01631
O9    4   -0.435460   -0.155406    0.652421    11.00000    0.03288    0.05796 =
         0.07004    0.01409   -0.02507   -0.01387
C21   1   -0.161107   -0.214019    0.805628    11.00000    0.02663    0.02651 =
         0.03779   -0.00035   -0.00854   -0.01330
C11   1   -0.218520   -0.277503    0.677567    11.00000    0.02755    0.03045 =
         0.03651    0.00414   -0.01302   -0.01353
C32   1   -0.226962   -0.474276    0.955476    11.00000    0.02908    0.03319 =
         0.02911    0.00111   -0.00679   -0.01288
C22   1   -0.297706   -0.307164    0.768099    11.00000    0.02563    0.03089 =
         0.03690    0.00235   -0.01173   -0.01364
AFIX  13
H22   2   -0.384788   -0.240246    0.786375    11.00000   -1.20000
AFIX   0
C33   1   -0.090513   -0.542282    0.937541    11.00000    0.02928    0.03920 =
         0.03768    0.00411   -0.00987   -0.01590
AFIX  43
H33   2   -0.027902   -0.506476    0.920569    11.00000   -1.20000
AFIX   0
C19   1    0.173278   -0.212742    0.789379    11.00000    0.02691    0.04669 =
         0.04341   -0.00118   -0.00676   -0.01890
AFIX  23
H19A  2    0.222008   -0.272749    0.741696    11.00000   -1.20000
H19B  2    0.196752   -0.246635    0.843824    11.00000   -1.20000
AFIX   0
C9    1    0.013525   -0.340406    0.586027    11.00000    0.03529    0.03673 =
         0.02803    0.00362   -0.01069   -0.01722
AFIX  13
H9    2    0.003137   -0.295494    0.531501    11.00000   -1.20000
AFIX   0
C5    1    0.192063   -0.505162    0.640577    11.00000    0.03025    0.03734 =
         0.02902    0.00008   -0.00352   -0.01599
AFIX  43
H5    2    0.132120   -0.491184    0.697413    11.00000   -1.20000
AFIX   0
C10   1   -0.101217   -0.383624    0.622504    11.00000    0.03233    0.03553 =
         0.03590   -0.00059   -0.01146   -0.01670
AFIX  23
H10A  2   -0.075349   -0.451981    0.659961    11.00000   -1.20000
H10B  2   -0.126371   -0.405873    0.574076    11.00000   -1.20000
AFIX   0
C4    1    0.318381   -0.593859    0.627526    11.00000    0.03135    0.03539 =
         0.03413    0.00195   -0.00669   -0.01536
C18   1   -0.020132   -0.258064    0.820318    11.00000    0.02831    0.03306 =
         0.02871   -0.00167   -0.00557   -0.01483
C7    1    0.242627   -0.456495    0.485964    11.00000    0.03924    0.04750 =
         0.02895    0.00244   -0.00873   -0.02245
AFIX  43
H7    2    0.217947   -0.410078    0.438484    11.00000   -1.20000
AFIX   0
C3    1    0.409335   -0.614752    0.541171    11.00000    0.02934    0.04186 =
         0.03958   -0.00883   -0.00144   -0.01623
C37   1   -0.140862   -0.719412    0.970251    11.00000    0.04676    0.03726 =
         0.03405    0.00590   -0.01129   -0.01693
C8    1    0.152440   -0.435698    0.569659    11.00000    0.03221    0.03669 =
         0.03040   -0.00056   -0.00685   -0.01800
C34   1   -0.320305   -0.526611    0.984617    11.00000    0.02906    0.04253 =
         0.04854    0.00496   -0.00579   -0.01671
AFIX  43
H34   2   -0.412001   -0.479789    0.999441    11.00000   -1.20000
AFIX   0
C12   1   -0.142616   -0.204646    0.700629    11.00000    0.02684    0.02752 =
         0.03855    0.00397   -0.01145   -0.01259
C26   1   -0.325282   -0.419376    0.769293    11.00000    0.04146    0.03878 =
         0.02983    0.00263   -0.01111   -0.02426
C23   1   -0.257404   -0.090131    0.848999    11.00000    0.03169    0.03074 =
         0.04210   -0.00214   -0.00959   -0.01295
C36   1   -0.276827   -0.648614    0.991612    11.00000    0.04334    0.04405 =
         0.04988    0.00934   -0.00952   -0.02545
AFIX  43
H36   2   -0.339787   -0.683849    1.010968    11.00000   -1.20000
AFIX   0
C13   1   -0.315077   -0.202925    0.623248    11.00000    0.03978    0.03730 =
         0.04809    0.00945   -0.02173   -0.02000
C6    1    0.369961   -0.546124    0.471947    11.00000    0.03816    0.05448 =
         0.02764   -0.00595   -0.00005   -0.02149
AFIX  43
H6    2    0.429365   -0.559859    0.414925    11.00000   -1.20000
AFIX   0
C27   1   -0.229854   -0.533944    0.766457    11.00000    0.05166    0.03894 =
         0.03470    0.00196   -0.01232   -0.02297
AFIX  43
H27   2   -0.142344   -0.545705    0.765658    11.00000   -1.20000
AFIX   0
C29   1   -0.264204   -0.631650    0.764795    11.00000    0.08473    0.03968 =
         0.04388    0.00191   -0.01492   -0.03035
AFIX  43
H29   2   -0.199934   -0.708581    0.762995    11.00000   -1.20000
AFIX   0
C35   1   -0.049085   -0.663920    0.945272    11.00000    0.03174    0.04064 =
         0.03889    0.00312   -0.00959   -0.00942
AFIX  43
H35   2    0.042566   -0.710191    0.933504    11.00000   -1.20000
AFIX   0
C24   1   -0.487458    0.041410    0.877776    11.00000    0.03605    0.02837 =
         0.06512   -0.00985   -0.01309   -0.00422
AFIX  23
H24A  2   -0.470899    0.101603    0.836535    11.00000   -1.20000
H24B  2   -0.492146    0.063328    0.937263    11.00000   -1.20000
AFIX   0
C28   1   -0.456249   -0.405010    0.772341    11.00000    0.04532    0.05848 =
         0.04779    0.00792   -0.01593   -0.03412
AFIX  43
H28   2   -0.522094   -0.328607    0.775674    11.00000   -1.20000
AFIX   0
C25   1   -0.615416    0.029914    0.876893    11.00000    0.03282    0.04712 =
         0.08645   -0.01989   -0.01619   -0.00345
AFIX  33
H25A  2   -0.689548    0.104754    0.894649    11.00000   -1.50000
H25B  2   -0.608811    0.007833    0.817664    11.00000   -1.50000
H25C  2   -0.629934   -0.030217    0.917801    11.00000   -1.50000
AFIX   0
C1    1    0.273776   -0.649230    0.779710    11.00000    0.04313    0.05496 =
         0.03953    0.01378   -0.00657   -0.01458
AFIX  33
H1A   2    0.317437   -0.704029    0.819824    11.00000   -1.50000
H1B   2    0.245662   -0.569054    0.800860    11.00000   -1.50000
H1C   2    0.196490   -0.663596    0.777044    11.00000   -1.50000
AFIX   0
C38   1   -0.092254   -0.853157    0.973323    11.00000    0.07052    0.03674 =
         0.06452    0.00768   -0.01541   -0.02077
AFIX  33
H38A  2    0.004486   -0.886886    0.956480    11.00000   -1.50000
H38B  2   -0.125803   -0.876304    1.032888    11.00000   -1.50000
H38C  2   -0.124443   -0.881586    0.932561    11.00000   -1.50000
AFIX   0
C20   1    0.207511   -0.104844    0.765532    11.00000    0.03930    0.05307 =
         0.07343   -0.00397   -0.00452   -0.02894
AFIX  33
H20A  2    0.302477   -0.126771    0.756395    11.00000   -1.50000
H20B  2    0.183566   -0.072270    0.711655    11.00000   -1.50000
H20C  2    0.158443   -0.046292    0.813250    11.00000   -1.50000
AFIX   0
C2    1    0.623358   -0.729558    0.446678    11.00000    0.03434    0.06958 =
         0.04889   -0.01918    0.00297   -0.01455
AFIX  33
H2A   2    0.705844   -0.794209    0.448989    11.00000   -1.50000
H2B   2    0.584015   -0.750951    0.406886    11.00000   -1.50000
H2C   2    0.641782   -0.659895    0.425381    11.00000   -1.50000
AFIX   0
C30   1   -0.489783   -0.501844    0.770505    11.00000    0.07106    0.08040 =
         0.06731    0.00739   -0.02221   -0.05790
AFIX  43
H30   2   -0.577569   -0.490624    0.772462    11.00000   -1.20000
AFIX   0
C14   1   -0.327106   -0.126803    0.479556    11.00000    0.08329    0.07579 =
         0.07927    0.04428   -0.05900   -0.04832
AFIX  23
H14A  2   -0.366701   -0.043674    0.498712    11.00000   -1.20000
H14B  2   -0.399072   -0.152613    0.480260    11.00000   -1.20000
AFIX   0
C16   1   -0.113134   -0.018962    0.650876    11.00000    0.06333    0.04494 =
         0.08734    0.02388   -0.01901   -0.03367
AFIX  23
H16A  2   -0.027287   -0.065219    0.610028    11.00000   -1.20000
H16B  2   -0.096155    0.000094    0.704195    11.00000   -1.20000
AFIX   0
C31   1   -0.394526   -0.613792    0.765832    11.00000    0.09650    0.07124 =
         0.06103    0.00626   -0.02375   -0.06631
AFIX  43
H31   2   -0.417005   -0.679031    0.763308    11.00000   -1.20000
AFIX   0
C15   1   -0.233177   -0.142451    0.388034    11.00000    0.14671    0.14353 =
         0.07660    0.06703   -0.06759   -0.10297
AFIX  33
H15A  2   -0.281687   -0.095841    0.346926    11.00000   -1.50000
H15B  2   -0.162547   -0.116588    0.388279    11.00000   -1.50000
H15C  2   -0.194764   -0.225008    0.369914    11.00000   -1.50000
AFIX   0
C17   1   -0.179947    0.089213    0.609233    11.00000    0.11339    0.05497 =
         0.13520    0.04548   -0.05529   -0.04882
AFIX  33
H17A  2   -0.124174    0.134964    0.593575    11.00000   -1.50000
H17B  2   -0.195762    0.069823    0.556236    11.00000   -1.50000
H17C  2   -0.264434    0.134949    0.650134    11.00000   -1.50000
AFIX   0
HKLF    4

REM  PB10 new in P-1
REM R1 =  0.0498 for    6620 Fo > 4sig(Fo)  and  0.0783 for all    9238 data
REM    469 parameters refined using      0 restraints

END

WGHT      0.0555      0.6918

REM Highest difference peak  0.409,  deepest hole -0.312,  1-sigma level  0.047
Q1    1  -0.2602 -0.4012  0.9429  11.00000  0.05    0.41
Q2    1  -0.2059 -0.1601  0.8273  11.00000  0.05    0.33
Q3    1  -0.0418 -0.8886  0.9019  11.00000  0.05    0.32
Q4    1  -0.0258 -0.8819  1.0102  11.00000  0.05    0.31
Q5    1  -0.1769 -0.8764  1.0077  11.00000  0.05    0.28
Q6    1  -0.2577 -0.2872  0.7215  11.00000  0.05    0.28
Q7    1  -0.2605 -0.3037  0.8800  11.00000  0.05    0.27
Q8    1  -0.2766  0.1188  0.6166  11.00000  0.05    0.27
Q9    1  -0.1736 -0.3253  0.6565  11.00000  0.05    0.25
Q10   1  -0.1969 -0.2404  0.6876  11.00000  0.05    0.24
Q11   1  -0.3176 -0.3691  0.7682  11.00000  0.05    0.24
Q12   1  -0.1916 -0.2564  0.8226  11.00000  0.05    0.23
Q13   1  -0.1077 -0.0424  0.5915  11.00000  0.05    0.22
Q14   1  -0.1826 -0.6783  0.7613  11.00000  0.05    0.22
Q15   1  -0.1146 -0.7759  0.9754  11.00000  0.05    0.22
Q16   1  -0.0952 -0.6901  0.9713  11.00000  0.05    0.22
Q17   1  -0.2795 -0.4639  0.7448  11.00000  0.05    0.22
Q18   1  -0.2630 -0.3034  0.8086  11.00000  0.05    0.22
Q19   1  -0.0804 -0.6011  0.9625  11.00000  0.05    0.22
Q20   1  -0.1415 -0.2140  0.7585  11.00000  0.05    0.21
Q21   1  -0.1012 -0.2331  0.8163  11.00000  0.05    0.21
Q22   1  -0.2729 -0.4850  0.9520  11.00000  0.05    0.21
Q23   1   0.3638 -0.6206  0.5806  11.00000  0.05    0.20
Q24   1  -0.1645 -0.5008  0.9687  11.00000  0.05    0.20
Q25   1   0.2685 -0.5240  0.6443  11.00000  0.05    0.19
;
_shelx_res_checksum    1556

_shelx_hkl_file
;
  -2   0   0  364.07   11.33
  -2   0   0  370.13   11.25
  -2   0   0  367.93   11.20
  -2   0   0  349.91   11.21
  -2   0   0  376.11   11.31
   2   0   0  366.68   11.30
   2   0   0  374.55   11.19
   2   0   0  360.52   11.29
  -3   0   0    3.32    0.15
  -3   0   0    3.26    0.17
  -3   0   0    3.36    0.15
  -3   0   0    3.01    0.17
  -3   0   0    3.32    0.17
   3   0   0    3.29    0.18
   3   0   0    3.39    0.17
   3   0   0    3.67    0.17
  -4   0   0   86.10    2.85
  -4   0   0   95.64    2.80
  -4   0   0   92.63    2.84
  -4   0   0   90.15    2.84
  -4   0   0   92.17    2.81
   4   0   0   79.34    2.84
   4   0   0   94.02    2.85
   4   0   0   93.85    2.82
  -5   0   0   54.85    1.70
  -5   0   0   53.54    1.75
  -5   0   0   53.43    1.78
  -5   0   0   52.38    1.76
  -5   0   0   53.38    1.72
   5   0   0   53.14    1.74
   5   0   0   54.78    1.78
   5   0   0   55.37    1.77
  -6   0   0    1.33    0.17
  -6   0   0    1.54    0.15
  -6   0   0    1.55    0.14
  -6   0   0    1.55    0.17
  -6   0   0    1.50    0.18
   6   0   0    1.33    0.19
   6   0   0    0.98    0.20
  -7   0   0    1.67    0.22
  -7   0   0    1.92    0.22
  -7   0   0    1.55    0.17
  -7   0   0    1.78    0.17
  -7   0   0    1.89    0.20
   7   0   0    2.17    0.25
   7   0   0    1.62    0.21
  -8   0   0    1.65    0.21
  -8   0   0    1.97    0.26
  -8   0   0    2.50    0.28
   8   0   0    1.92    0.24
   8   0   0    2.39    0.28
  -9   0   0   -0.26    0.16
  -9   0   0    0.00    0.13
  -9   0   0    0.01    0.18
   9   0   0    0.04    0.13
 -10   0   0    1.98    0.31
 -10   0   0    2.63    0.34
 -10   0   0    2.26    0.32
  10   0   0    2.61    0.38
  10   0   0    2.63    0.36
 -11   0   0   -0.12    0.25
  11   0   0   -0.02    0.27
  11   0   0   -0.07    0.20
 -12   0   0    2.13    0.39
  12   0   0    2.13    0.33
 -13   0   0    1.68    0.42
  13   0   0    1.49    0.40
  12  -1   0    0.16    0.29
 -12   1   0   -0.27    0.32
  11  -1   0   -0.30    0.31
  11  -1   0    0.32    0.21
 -11   1   0    0.24    0.27
  10  -1   0    0.98    0.23
  10  -1   0    1.00    0.27
 -10   1   0    1.23    0.27
 -10   1   0    0.64    0.29
   9  -1   0    5.55    0.41
   9  -1   0    4.85    0.45
  -9   1   0    5.24    0.43
  -9   1   0    5.14    0.41
   8  -1   0    1.89    0.26
  -8   1   0    2.24    0.21
  -8   1   0    1.92    0.26
  -8   1   0    2.09    0.28
   7  -1   0   14.35    0.64
   7  -1   0   13.97    0.61
  -7   1   0   14.33    0.63
  -7   1   0   13.53    0.62
  -7   1   0   13.63    0.52
   6  -1   0    3.13    0.24
   6  -1   0    3.14    0.27
  -6   1   0    3.63    0.26
  -6   1   0    3.39    0.21
  -6   1   0    3.54    0.25
  -6   1   0    3.34    0.19
   5  -1   0   26.92    0.93
   5  -1   0   25.90    0.94
  -5   1   0   25.51    0.85
  -5   1   0   26.25    0.88
  -5   1   0   25.76    0.93
  -5   1   0   25.52    0.93
   4  -1   0   14.68    0.56
   4  -1   0   13.93    0.55
   4  -1   0   14.42    0.57
  -4   1   0   14.64    0.55
  -4   1   0   14.89    0.48
  -4   1   0   15.03    0.56
  -4   1   0   14.89    0.53
  -4   1   0   14.76    0.49
   3  -1   0  216.63    6.64
   3  -1   0  215.89    6.61
   3  -1   0  219.66    6.62
  -3   1   0  210.97    6.62
  -3   1   0  216.68    6.62
  -3   1   0  214.19    6.58
  -3   1   0  217.97    6.60
   2  -1   0  104.31    3.20
   2  -1   0  102.96    3.18
   2  -1   0  103.62    3.19
  -2   1   0  101.96    3.19
  -2   1   0  105.32    3.18
  -2   1   0  101.33    3.19
  -2   1   0  103.29    3.16
   1  -1   0  437.36   13.53
  -1   1   0  434.53   13.53
  -1   1   0  449.93   13.50
  -1   1   0  448.25   13.54
  -1   1   0  438.59   13.52
  -2  -1   0  177.94    5.96
  -2  -1   0  194.54    5.91
  -2  -1   0  190.66    5.95
  -2  -1   0  200.30    5.83
   2   1   0  189.44    5.88
   2   1   0  189.39    5.82
   2   1   0  197.03    5.87
  -3  -1   0    7.97    0.30
  -3  -1   0    8.22    0.31
  -3  -1   0    7.37    0.31
   3   1   0    8.41    0.27
   3   1   0    8.28    0.32
   3   1   0    7.49    0.31
  -4  -1   0    0.64    0.09
  -4  -1   0    0.75    0.10
  -4  -1   0    0.82    0.11
  -4  -1   0    0.53    0.08
   4   1   0    0.78    0.11
   4   1   0    0.55    0.08
  -5  -1   0    8.29    0.37
  -5  -1   0    8.25    0.35
  -5  -1   0    8.33    0.37
   5   1   0    8.14    0.37
   5   1   0    7.90    0.37
  -6  -1   0   10.43    0.46
  -6  -1   0   10.14    0.44
  -6  -1   0    9.56    0.42
  -6  -1   0   10.10    0.44
   6   1   0    9.60    0.44
   6   1   0   10.36    0.46
  -7  -1   0    2.40    0.24
  -7  -1   0    2.91    0.25
  -7  -1   0    2.52    0.21
  -7  -1   0    2.41    0.22
   7   1   0    2.52    0.23
   7   1   0    2.21    0.24
  -8  -1   0    0.78    0.16
  -8  -1   0    1.07    0.17
  -8  -1   0    0.94    0.19
   8   1   0    0.84    0.17
   8   1   0    0.78    0.17
  -9  -1   0    5.26    0.40
  -9  -1   0    5.20    0.38
  -9  -1   0    4.45    0.33
  -9  -1   0    4.64    0.33
   9   1   0    4.40    0.39
   9   1   0    4.11    0.35
 -10  -1   0    1.51    0.24
 -10  -1   0    1.92    0.30
 -10  -1   0    1.42    0.25
  10   1   0    1.84    0.26
 -11  -1   0   -0.20    0.21
 -11  -1   0    0.15    0.23
  11   1   0    0.05    0.19
  11   1   0    0.33    0.24
 -12  -1   0    0.48    0.28
 -12  -1   0    0.04    0.29
  12   1   0   -0.28    0.25
 -13  -1   0    1.16    0.40
  13   1   0    1.03    0.35
  12  -2   0    0.06    0.35
  11  -2   0    4.97    0.54
  11  -2   0    4.36    0.62
 -11   2   0    5.28    0.54
  10  -2   0    0.65    0.21
 -10   2   0    0.31    0.25
 -10   2   0    0.05    0.28
   9  -2   0    5.40    0.43
   9  -2   0    6.28    0.52
  -9   2   0    5.25    0.45
  -9   2   0    6.50    0.47
   8  -2   0    2.05    0.28
   8  -2   0    1.92    0.28
  -8   2   0    2.06    0.27
  -8   2   0    1.90    0.27
   7  -2   0   34.30    1.24
   7  -2   0   34.45    1.30
  -7   2   0   33.99    1.25
  -7   2   0   33.63    1.26
   6  -2   0    0.35    0.15
   6  -2   0    0.24    0.10
  -6   2   0    0.30    0.12
   5  -2   0    0.10    0.07
   5  -2   0    0.15    0.11
  -5   2   0    0.22    0.07
  -5   2   0    0.02    0.08
  -5   2   0    0.03    0.10
  -5   2   0    0.06    0.08
   4  -2   0   55.43    1.85
   4  -2   0   57.28    1.82
  -4   2   0   56.68    1.83
  -4   2   0   55.44    1.80
  -4   2   0   56.61    1.77
  -4   2   0   54.63    1.82
   3  -2   0   16.31    0.57
   3  -2   0   16.19    0.61
  -3   2   0   14.49    0.57
  -3   2   0   16.75    0.58
  -3   2   0   15.89    0.58
  -3   2   0   15.91    0.55
   2  -2   0    1.56    0.14
   2  -2   0    1.60    0.10
  -2   2   0    1.68    0.11
  -2   2   0    1.75    0.12
  -2   2   0    1.62    0.12
  -2   2   0    1.66    0.11
   1  -2   0   19.89    0.68
  -1   2   0   19.54    0.65
  -1   2   0   20.60    0.68
  -1   2   0   20.82    0.68
   0  -2   0   57.16    1.78
   0  -2   0   55.71    1.79
   0  -2   0   59.23    1.81
   0   2   0   55.83    1.78
   0   2   0   58.10    1.76
   0   2   0   61.33    1.82
  -1  -2   0   58.92    1.86
  -1  -2   0   57.96    1.89
   1   2   0   62.41    1.86
   1   2   0   64.18    1.91
  -2  -2   0   11.16    0.38
  -2  -2   0   11.15    0.41
  -2  -2   0   10.82    0.40
   2   2   0   11.34    0.38
   2   2   0   11.14    0.40
  -3  -2   0   67.60    2.04
  -3  -2   0   55.45    2.01
  -3  -2   0   66.75    2.00
  -3  -2   0   64.35    2.04
   3   2   0   67.54    2.03
   3   2   0   64.20    2.02
  -4  -2   0   19.62    0.64
  -4  -2   0   18.13    0.67
  -4  -2   0   18.80    0.67
  -4  -2   0   18.52    0.66
   4   2   0   18.12    0.66
   4   2   0   18.09    0.66
  -5  -2   0   20.17    0.81
  -5  -2   0   22.91    0.82
  -5  -2   0   23.03    0.84
  -5  -2   0   23.92    0.79
   5   2   0   23.75    0.74
   5   2   0   22.84    0.81
   5   2   0   22.94    0.82
  -6  -2   0   17.48    0.68
  -6  -2   0   17.11    0.64
  -6  -2   0   17.42    0.66
  -6  -2   0   16.45    0.66
   6   2   0   16.06    0.64
   6   2   0   17.38    0.67
  -7  -2   0   41.30    1.44
  -7  -2   0   40.81    1.41
  -7  -2   0   42.01    1.45
  -7  -2   0   42.13    1.40
   7   2   0   42.03    1.44
   7   2   0   39.01    1.40
  -8  -2   0    0.01    0.13
  -8  -2   0    0.03    0.11
  -8  -2   0   -0.14    0.11
  -8  -2   0    0.01    0.12
   8   2   0    0.06    0.12
   8   2   0   -0.10    0.10
  -9  -2   0    5.86    0.40
  -9  -2   0    5.54    0.36
  -9  -2   0    5.54    0.38
  -9  -2   0    6.13    0.43
   9   2   0    5.20    0.38
   9   2   0    6.11    0.42
 -10  -2   0    0.01    0.15
 -10  -2   0   -0.05    0.17
 -10  -2   0   -0.07    0.19
 -10  -2   0    0.01    0.20
  10   2   0   -0.04    0.14
 -11  -2   0    0.67    0.25
 -11  -2   0    0.50    0.27
 -11  -2   0    0.86    0.26
  11   2   0    0.94    0.23
 -12  -2   0    3.91    0.52
 -12  -2   0    3.67    0.47
 -13  -2   0    0.75    0.35
  13   2   0    0.69    0.27
  12  -3   0    5.34    0.73
  10  -3   0   -0.15    0.22
  10  -3   0    0.12    0.36
 -10   3   0    0.36    0.30
 -10   3   0   -0.16    0.25
   9  -3   0    3.52    0.38
   9  -3   0    3.31    0.50
  -9   3   0    3.34    0.40
  -9   3   0    2.53    0.38
   8  -3   0    0.44    0.22
   8  -3   0    0.08    0.14
  -8   3   0   -0.03    0.18
  -8   3   0    0.23    0.18
   7  -3   0    0.20    0.21
   7  -3   0    0.11    0.14
  -7   3   0    0.24    0.15
  -7   3   0    0.00    0.15
   6  -3   0    0.97    0.20
   6  -3   0    1.42    0.19
  -6   3   0    1.38    0.19
  -6   3   0    1.26    0.16
  -6   3   0    1.69    0.23
   5  -3   0   22.11    0.82
  -5   3   0   23.21    0.79
  -5   3   0   21.85    0.86
  -5   3   0   22.04    0.83
   4  -3   0    5.73    0.29
   4  -3   0    5.79    0.34
  -4   3   0    5.91    0.28
  -4   3   0    5.71    0.31
   3  -3   0  128.49    4.05
   3  -3   0  131.23    3.99
  -3   3   0  128.42    3.99
  -3   3   0  133.26    4.01
  -3   3   0  130.61    4.02
  -3   3   0  119.01    3.98
   2  -3   0   51.00    1.59
  -2   3   0   48.83    1.59
  -2   3   0   50.79    1.62
  -2   3   0   50.25    1.62
   1  -3   0   34.85    1.06
   1  -3   0   30.51    1.04
  -1   3   0   34.78    1.10
  -1   3   0   32.86    1.05
   0  -3   0   68.44    2.16
   0  -3   0   62.63    2.17
   0   3   0   71.36    2.19
   0   3   0   69.38    2.11
   0   3   0   74.43    2.15
  -1  -3   0    1.96    0.12
   1   3   0    2.06    0.14
  -2  -3   0  146.57    4.58
  -2  -3   0  147.62    4.63
   2   3   0  155.69    4.63
  -3  -3   0    4.56    0.24
  -3  -3   0    5.24    0.24
  -3  -3   0    4.40    0.20
   3   3   0    4.68    0.21
   3   3   0    4.60    0.22
  -4  -3   0    6.87    0.30
  -4  -3   0    7.05    0.33
  -4  -3   0    6.49    0.32
   4   3   0    7.10    0.30
   4   3   0    7.13    0.29
  -5  -3   0   14.36    0.58
  -5  -3   0   14.84    0.53
  -5  -3   0   14.22    0.58
   5   3   0   14.80    0.56
   5   3   0   14.58    0.52
   5   3   0   13.93    0.55
  -6  -3   0    6.21    0.33
  -6  -3   0    6.66    0.35
  -6  -3   0    6.14    0.30
   6   3   0    6.52    0.33
   6   3   0    6.55    0.27
   6   3   0    6.22    0.32
  -7  -3   0    6.06    0.35
  -7  -3   0    6.05    0.35
  -7  -3   0    6.15    0.36
  -7  -3   0    6.15    0.33
   7   3   0    5.45    0.32
   7   3   0    6.02    0.27
   7   3   0    6.35    0.35
  -8  -3   0   14.88    0.61
  -8  -3   0   15.04    0.63
  -8  -3   0   14.88    0.66
  -8  -3   0   15.27    0.66
   8   3   0   13.76    0.61
   8   3   0   14.95    0.65
  -9  -3   0    6.02    0.39
  -9  -3   0    5.94    0.39
  -9  -3   0    6.04    0.42
   9   3   0    5.84    0.40
   9   3   0    6.26    0.38
 -10  -3   0   16.24    0.78
 -10  -3   0   16.25    0.75
 -10  -3   0   15.84    0.71
 -10  -3   0   15.62    0.71
  10   3   0   16.68    0.76
 -11  -3   0    0.00    0.24
 -11  -3   0    0.78    0.25
 -11  -3   0    0.32    0.18
 -11  -3   0    0.11    0.21
  11   3   0    0.40    0.21
  11   3   0    0.32    0.20
 -12  -3   0   11.07    0.73
 -12  -3   0   11.97    0.68
  12   3   0   12.67    0.71
 -13  -3   0    1.53    0.39
 -13  -3   0    1.10    0.34
  13   3   0    0.81    0.29
 -14  -3   0    4.61    0.57
  11  -4   0    0.60    0.35
 -11   4   0    0.19    0.33
  10  -4   0    0.54    0.27
  10  -4   0    0.33    0.41
   9  -4   0   -0.18    0.19
   9  -4   0    0.06    0.32
  -9   4   0   -0.15    0.23
  -9   4   0    0.27    0.26
   8  -4   0    7.89    0.62
   8  -4   0    8.39    0.51
  -8   4   0    7.12    0.52
  -8   4   0    8.15    0.53
   7  -4   0   12.00    0.58
  -7   4   0   11.60    0.61
  -7   4   0   12.05    0.59
  -7   4   0   11.59    0.50
   6  -4   0    8.80    0.53
   6  -4   0    9.17    0.46
  -6   4   0    8.37    0.42
  -6   4   0    9.35    0.50
  -6   4   0    9.74    0.48
   5  -4   0   15.55    0.70
   5  -4   0   15.44    0.62
  -5   4   0   14.35    0.62
  -5   4   0   15.19    0.60
  -5   4   0   15.47    0.66
   4  -4   0    8.42    0.38
   4  -4   0    8.54    0.45
  -4   4   0    8.84    0.42
  -4   4   0    8.57    0.39
   3  -4   0  100.83    3.14
  -3   4   0  101.40    3.17
  -3   4   0  100.10    3.19
  -3   4   0   98.69    3.14
   2  -4   0    0.47    0.08
   2  -4   0    0.42    0.07
  -2   4   0    0.50    0.07
  -2   4   0    0.23    0.10
  -2   4   0    0.36    0.08
   1  -4   0   57.24    1.81
   1  -4   0   53.82    1.81
   1  -4   0   61.54    1.80
  -1   4   0   56.37    1.79
  -1   4   0   60.06    1.88
   0  -4   0    1.72    0.13
   0   4   0    2.04    0.08
   0   4   0    2.00    0.12
   0   4   0    2.15    0.17
  -1  -4   0   35.06    1.23
   1   4   0   40.10    1.26
  -2  -4   0    0.29    0.04
  -2  -4   0    0.15    0.06
   2   4   0    0.36    0.09
  -3  -4   0    4.83    0.23
   3   4   0    5.96    0.28
   3   4   0    5.95    0.24
  -4  -4   0    0.48    0.09
  -4  -4   0    0.66    0.09
  -4  -4   0    0.54    0.10
   4   4   0    0.66    0.09
   4   4   0    0.62    0.11
  -5  -4   0   10.48    0.44
  -5  -4   0   10.07    0.46
   5   4   0   10.21    0.44
   5   4   0    9.22    0.43
  -6  -4   0    0.12    0.08
  -6  -4   0    0.32    0.11
  -6  -4   0    0.28    0.10
   6   4   0    0.21    0.07
   6   4   0    0.24    0.08
  -7  -4   0    4.03    0.30
  -7  -4   0    3.52    0.30
   7   4   0    3.64    0.22
   7   4   0    4.18    0.27
  -8  -4   0    1.83    0.24
  -8  -4   0    1.84    0.23
   8   4   0    1.37    0.19
   8   4   0    1.70    0.16
  -9  -4   0   20.60    0.89
  -9  -4   0   20.75    0.85
  -9  -4   0   20.88    0.80
  -9  -4   0   20.95    0.88
   9   4   0   20.76    0.87
 -10  -4   0    2.79    0.34
 -10  -4   0    2.25    0.31
 -10  -4   0    2.73    0.29
 -10  -4   0    2.41    0.33
  10   4   0    2.30    0.30
 -11  -4   0    9.13    0.54
 -11  -4   0    9.88    0.55
 -11  -4   0    9.22    0.63
 -11  -4   0    9.31    0.61
  11   4   0   10.04    0.58
 -12  -4   0    0.65    0.30
 -12  -4   0    0.14    0.27
  12   4   0    0.22    0.23
 -13  -4   0    8.23    0.79
 -13  -4   0    9.75    0.68
  13   4   0   10.13    0.68
  10  -5   0   -0.08    0.28
  10  -5   0   -0.02    0.46
 -10   5   0    0.22    0.30
   9  -5   0    1.27    0.28
   9  -5   0    0.92    0.41
  -9   5   0    1.47    0.35
   8  -5   0   -0.04    0.32
  -8   5   0    0.40    0.25
  -8   5   0    0.32    0.23
   7  -5   0    1.94    0.25
   7  -5   0    2.66    0.38
  -7   5   0    1.76    0.28
  -7   5   0    1.58    0.25
  -7   5   0    2.07    0.25
   6  -5   0   23.72    1.04
   6  -5   0   24.47    0.93
  -6   5   0   24.13    0.92
  -6   5   0   23.29    0.99
  -6   5   0   25.13    0.95
   5  -5   0    0.79    0.14
   5  -5   0    0.59    0.21
  -5   5   0    0.72    0.18
  -5   5   0    0.68    0.16
  -5   5   0    0.74    0.15
   4  -5   0   11.93    0.48
   4  -5   0   11.70    0.58
  -4   5   0   10.91    0.52
  -4   5   0   10.87    0.48
  -4   5   0   10.73    0.51
   3  -5   0    4.50    0.25
   3  -5   0    4.41    0.23
  -3   5   0    4.35    0.27
  -3   5   0    4.36    0.28
  -3   5   0    4.15    0.23
   2  -5   0   29.59    0.95
   2  -5   0   28.01    0.96
  -2   5   0   29.11    1.03
  -2   5   0   28.18    0.95
   1  -5   0    6.24    0.28
   1  -5   0    6.54    0.30
   1  -5   0    7.28    0.27
  -1   5   0    7.45    0.27
  -1   5   0    5.76    0.42
   0  -5   0   76.13    2.48
   0   5   0   81.11    2.54
  -1  -5   0    1.45    0.14
   1   5   0    1.57    0.13
   1   5   0    1.67    0.17
  -2  -5   0    7.77    0.36
   2   5   0    8.34    0.38
   2   5   0    7.94    0.28
  -3  -5   0    3.81    0.24
  -3  -5   0    3.46    0.17
   3   5   0    3.87    0.17
   3   5   0    3.80    0.24
  -4  -5   0  111.11    3.48
   4   5   0  113.94    3.54
   4   5   0  110.68    3.48
  -5  -5   0   58.39    2.05
  -5  -5   0   64.59    2.11
  -5  -5   0   63.11    2.13
   5   5   0   66.52    2.08
   5   5   0   66.48    2.06
  -6  -5   0   78.00    2.54
  -6  -5   0   76.41    2.55
  -6  -5   0   77.07    2.49
   6   5   0   77.27    2.48
   6   5   0   77.20    2.48
  -7  -5   0    2.67    0.23
  -7  -5   0    2.77    0.27
   7   5   0    2.37    0.21
   7   5   0    2.57    0.22
  -8  -5   0    0.22    0.15
  -8  -5   0    0.31    0.12
  -8  -5   0    0.33    0.14
   8   5   0    0.31    0.11
   8   5   0    0.31    0.12
  -9  -5   0    3.63    0.37
  -9  -5   0    3.14    0.33
  -9  -5   0    3.07    0.35
   9   5   0    3.04    0.31
   9   5   0    3.41    0.25
 -10  -5   0   28.73    1.12
 -10  -5   0   27.35    1.15
 -10  -5   0   27.84    1.14
  10   5   0   27.82    1.13
  10   5   0   28.68    0.97
 -11  -5   0    9.40    0.62
 -11  -5   0    8.97    0.56
 -11  -5   0    8.02    0.60
  11   5   0    9.11    0.55
 -12  -5   0    4.03    0.56
 -12  -5   0    4.53    0.47
  12   5   0    4.61    0.48
 -13  -5   0   -0.32    0.37
  13   5   0   -0.03    0.26
 -10   6   0    0.27    0.31
   9  -6   0    0.19    0.28
   9  -6   0    0.13    0.45
  -9   6   0    0.22    0.37
  -9   6   0    0.79    0.36
   8  -6   0    1.97    0.44
   8  -6   0    2.29    0.33
  -8   6   0    2.18    0.34
  -8   6   0    2.48    0.31
   7  -6   0    0.52    0.19
   7  -6   0    0.13    0.29
   7  -6   0    0.11    0.25
  -7   6   0    0.27    0.20
  -7   6   0    0.51    0.21
  -7   6   0    0.15    0.22
   6  -6   0    5.00    0.36
   6  -6   0    5.69    0.54
  -6   6   0    4.60    0.38
  -6   6   0    3.72    0.37
  -6   6   0    4.61    0.38
   5  -6   0   31.26    1.10
   5  -6   0   31.60    1.25
   5  -6   0   27.84    1.10
  -5   6   0   29.20    1.17
  -5   6   0   30.15    1.14
  -5   6   0   29.98    1.09
   4  -6   0    3.46    0.36
   4  -6   0    3.25    0.26
   4  -6   0    3.28    0.24
  -4   6   0    3.40    0.25
  -4   6   0    3.68    0.30
  -4   6   0    3.49    0.29
   3  -6   0   26.32    0.95
   3  -6   0   28.66    0.96
  -3   6   0   28.62    1.04
  -3   6   0   27.40    0.95
  -3   6   0   26.95    1.03
   2  -6   0    5.00    0.24
   2  -6   0    5.01    0.24
  -2   6   0    4.81    0.29
  -2   6   0    5.27    0.33
  -2   6   0    5.11    0.24
   1  -6   0    3.60    0.22
  -1   6   0    4.35    0.30
  -1   6   0    4.07    0.18
   0  -6   0    8.09    0.37
   0   6   0    8.22    0.43
   0   6   0    8.68    0.34
  -1  -6   0    0.60    0.13
   1   6   0    0.47    0.10
   1   6   0    0.22    0.16
  -2  -6   0   21.94    0.82
   2   6   0   20.27    0.88
   3   6   0    0.02    0.16
  -4  -6   0   34.50    1.24
  -4  -6   0   34.18    1.14
   4   6   0   34.79    1.14
   4   6   0   35.67    1.24
  -5  -6   0    1.76    0.15
  -5  -6   0    1.57    0.20
  -5  -6   0    1.56    0.21
   5   6   0    1.54    0.14
   5   6   0    1.50    0.19
  -6  -6   0    0.58    0.15
  -6  -6   0    0.46    0.10
   6   6   0    0.64    0.11
   6   6   0    0.71    0.13
  -7  -6   0   11.33    0.57
  -7  -6   0   11.01    0.51
  -7  -6   0   11.68    0.59
   7   6   0   10.61    0.50
   7   6   0   11.54    0.51
  -8  -6   0    5.76    0.42
  -8  -6   0    5.99    0.41
  -8  -6   0    4.85    0.36
   8   6   0    5.62    0.35
   8   6   0    5.54    0.33
  -9  -6   0   12.71    0.69
  -9  -6   0   12.80    0.62
  -9  -6   0   11.86    0.64
   9   6   0   12.86    0.62
   9   6   0   12.07    0.55
 -10  -6   0    0.14    0.21
 -10  -6   0    0.14    0.18
 -10  -6   0   -0.19    0.20
  10   6   0    0.07    0.14
 -11  -6   0    1.69    0.29
 -11  -6   0    1.19    0.31
 -11  -6   0    1.58    0.29
  11   6   0    1.50    0.25
  11   6   0    2.09    0.25
 -12  -6   0    0.26    0.31
 -12  -6   0    0.20    0.28
  12   6   0    0.21    0.22
 -13  -6   0   11.19    0.85
 -13  -6   0   11.23    0.71
  13   6   0   10.65    0.71
  14   6   0    0.53    0.32
   9  -7   0    2.51    0.65
   9  -7   0    1.98    0.38
  -9   7   0    2.20    0.45
   8  -7   0    0.31    0.26
   8  -7   0    0.41    0.44
  -8   7   0    0.53    0.28
  -8   7   0    0.47    0.33
  -8   7   0    0.03    0.31
   7  -7   0    1.71    0.31
   7  -7   0    1.54    0.43
   7  -7   0    1.83    0.28
  -7   7   0    1.58    0.31
  -7   7   0    1.23    0.30
   6  -7   0    2.96    0.42
   6  -7   0    3.08    0.34
  -6   7   0    2.87    0.34
  -6   7   0    3.10    0.36
  -6   7   0    2.79    0.36
   5  -7   0    2.35    0.29
   5  -7   0    2.61    0.37
   5  -7   0    2.71    0.28
  -5   7   0    2.84    0.31
  -5   7   0    2.70    0.35
   4  -7   0    0.08    0.20
   4  -7   0   -0.21    0.12
  -4   7   0   -0.14    0.11
  -4   7   0    0.14    0.14
  -4   7   0   -0.28    0.18
   3  -7   0   11.70    0.45
   3  -7   0    9.80    0.43
  -3   7   0    9.81    0.43
  -3   7   0   11.54    0.54
  -3   7   0   10.71    0.55
   2  -7   0    0.41    0.09
   2  -7   0    0.18    0.09
   2  -7   0    0.35    0.09
  -2   7   0    0.25    0.08
  -2   7   0    0.31    0.15
  -2   7   0    0.41    0.13
   1  -7   0    0.58    0.12
  -1   7   0    0.65    0.09
  -1   7   0    0.69    0.16
  -1   7   0    0.76    0.14
   0  -7   0    0.15    0.09
   0   7   0    0.12    0.07
   0   7   0    0.09    0.11
  -1  -7   0   19.58    0.77
   1   7   0   20.10    0.82
   1   7   0   20.92    0.74
  -2  -7   0   27.04    0.99
   2   7   0   26.71    0.96
   2   7   0   26.57    1.02
  -3  -7   0   13.57    0.60
   3   7   0   13.24    0.45
   3   7   0   13.28    0.60
  -4  -7   0    0.26    0.11
  -4  -7   0    0.47    0.08
   4   7   0    0.41    0.07
   4   7   0    0.43    0.13
  -5  -7   0    3.44    0.22
   5   7   0    3.82    0.29
   5   7   0    3.38    0.20
  -6  -7   0    2.67    0.28
  -6  -7   0    2.38    0.29
  -6  -7   0    2.49    0.21
   6   7   0    2.60    0.26
   6   7   0    2.27    0.20
  -7  -7   0   16.19    0.68
  -7  -7   0   17.17    0.76
  -7  -7   0   17.08    0.78
   7   7   0   16.57    0.71
   7   7   0   16.93    0.67
  -8  -7   0    5.35    0.37
  -8  -7   0    5.44    0.42
  -8  -7   0    5.34    0.43
   8   7   0    5.71    0.36
   8   7   0    5.10    0.33
  -9  -7   0   56.12    1.92
  -9  -7   0   53.75    1.99
  -9  -7   0   53.84    1.96
   9   7   0   54.25    1.86
   9   7   0   55.42    1.89
 -10  -7   0    8.73    0.58
 -10  -7   0    8.24    0.55
 -10  -7   0    8.24    0.60
  10   7   0    7.97    0.46
 -11  -7   0    5.80    0.53
 -11  -7   0    4.80    0.56
 -11  -7   0    5.08    0.53
  11   7   0    5.33    0.42
  11   7   0    4.81    0.37
 -12  -7   0   -0.07    0.32
 -12  -7   0    0.07    0.28
  12   7   0   -0.26    0.21
 -13  -7   0   32.20    1.36
  13   7   0   32.62    1.36
  14   7   0    1.08    0.35
   8  -8   0   -0.07    0.56
   8  -8   0    1.02    0.32
  -8   8   0    0.07    0.27
  -8   8   0    0.25    0.41
  -8   8   0    0.56    0.40
   7  -8   0    0.05    0.22
   7  -8   0    0.35    0.47
  -7   8   0    0.32    0.24
  -7   8   0   -0.12    0.28
  -7   8   0   -0.26    0.30
   6  -8   0    0.47    0.39
   6  -8   0   -0.17    0.20
   6  -8   0    0.23    0.18
  -6   8   0   -0.13    0.22
  -6   8   0    0.02    0.26
   5  -8   0   13.16    0.84
   5  -8   0   14.03    0.62
  -5   8   0   14.46    0.73
  -5   8   0   13.81    0.73
   4  -8   0    0.14    0.12
   4  -8   0    0.18    0.25
   4  -8   0    0.07    0.12
  -4   8   0    0.16    0.13
  -4   8   0    0.11    0.16
  -4   8   0    0.18    0.20
   3  -8   0   -0.04    0.09
  -3   8   0    0.07    0.10
  -3   8   0   -0.06    0.18
  -3   8   0   -0.06    0.13
   2  -8   0    6.06    0.32
  -2   8   0    6.77    0.44
  -2   8   0    6.69    0.39
  -2   8   0    6.44    0.29
   1  -8   0    7.15    0.36
  -1   8   0    7.54    0.47
  -1   8   0    7.11    0.39
   0   8   0    4.10    0.37
   0   8   0    4.32    0.23
  -1  -8   0    0.25    0.12
   1   8   0    0.20    0.13
   1   8   0    0.03    0.09
  -2  -8   0    9.55    0.48
   2   8   0    9.40    0.44
   2   8   0    9.46    0.51
  -3  -8   0    1.04    0.19
   3   8   0    0.79    0.17
  -4  -8   0    0.69    0.19
   4   8   0    0.74    0.17
   4   8   0    0.78    0.09
  -5  -8   0    2.75    0.20
  -5  -8   0    2.83    0.32
   5   8   0    2.42    0.18
   5   8   0    2.62    0.32
  -6  -8   0    6.05    0.41
  -6  -8   0    5.96    0.42
   6   8   0    6.08    0.40
   6   8   0    5.48    0.30
  -7  -8   0   10.49    0.59
  -7  -8   0   10.05    0.56
  -7  -8   0   10.04    0.48
   7   8   0    9.72    0.53
   7   8   0   10.10    0.46
  -8  -8   0    9.56    0.50
  -8  -8   0    9.98    0.60
  -8  -8   0    9.29    0.62
   8   8   0    9.82    0.50
   8   8   0    8.64    0.53
  -9  -8   0   25.16    1.12
  -9  -8   0   26.11    1.10
  -9  -8   0   25.23    1.02
   9   8   0   24.29    1.00
   9   8   0   25.32    0.99
 -10  -8   0    8.78    0.65
 -10  -8   0    8.88    0.61
 -10  -8   0    8.18    0.56
  10   8   0    9.28    0.52
  10   8   0    8.63    0.52
 -11  -8   0   -0.12    0.28
 -11  -8   0   -0.43    0.28
 -11  -8   0   -0.35    0.24
  11   8   0    0.01    0.19
  11   8   0   -0.06    0.17
 -12  -8   0    2.07    0.41
 -12  -8   0    2.11    0.47
  12   8   0    1.98    0.30
  12   8   0    1.32    0.29
 -13  -8   0    4.57    0.66
  13   8   0    3.67    0.43
  14   8   0    1.71    0.40
   7  -9   0    0.25    0.27
  -7   9   0    0.06    0.28
  -7   9   0   -0.04    0.36
  -7   9   0    0.06    0.38
   6  -9   0    2.12    0.51
   6  -9   0    2.22    0.28
  -6   9   0    1.93    0.37
  -6   9   0    2.24    0.33
  -6   9   0    2.47    0.41
   5  -9   0    1.51    0.45
   5  -9   0    2.08    0.25
  -5   9   0    2.19    0.39
   4  -9   0    5.34    0.61
  -4   9   0    5.55    0.52
  -4   9   0    5.45    0.43
  -4   9   0    4.86    0.36
  -3   9   0    6.85    0.35
  -3   9   0    7.14    0.53
  -3   9   0    7.23    0.46
   2  -9   0    6.82    0.37
  -2   9   0    6.72    0.43
  -2   9   0    7.24    0.52
  -2   9   0    7.12    0.31
   1  -9   0    4.18    0.30
  -1   9   0    4.10    0.44
  -1   9   0    4.65    0.33
   0  -9   0    0.22    0.13
   0   9   0    0.14    0.12
   0   9   0    0.44    0.19
  -1  -9   0   44.06    1.56
   1   9   0   44.98    1.49
   1   9   0   44.43    1.64
  -2  -9   0   47.26    1.68
   2   9   0   48.90    1.75
   2   9   0   48.42    1.64
  -3  -9   0    2.05    0.27
   3   9   0    2.35    0.30
   3   9   0    1.53    0.22
  -4  -9   0   18.09    0.80
   4   9   0   17.34    0.59
   4   9   0   18.29    0.81
  -5  -9   0    3.21    0.34
  -5  -9   0    3.16    0.21
   5   9   0    3.53    0.34
   5   9   0    3.20    0.19
  -6  -9   0    3.08    0.34
  -6  -9   0    2.68    0.34
   6   9   0    2.49    0.20
   6   9   0    2.89    0.33
  -7  -9   0    1.35    0.19
  -7  -9   0    1.53    0.28
  -7  -9   0    1.02    0.24
   7   9   0    1.16    0.25
   7   9   0    1.45    0.19
  -8  -9   0    0.89    0.22
  -8  -9   0    0.98    0.20
  -8  -9   0    0.58    0.23
   8   9   0    0.91    0.16
   8   9   0    0.61    0.22
  -9  -9   0   12.27    0.71
  -9  -9   0   10.94    0.60
  -9  -9   0   11.36    0.72
   9   9   0   11.51    0.63
   9   9   0   11.99    0.57
 -10  -9   0    5.73    0.48
 -10  -9   0    4.68    0.56
 -10  -9   0    6.45    0.58
  10   9   0    5.66    0.48
  10   9   0    6.30    0.43
 -11  -9   0    2.16    0.35
 -11  -9   0    2.83    0.42
 -11  -9   0    1.45    0.41
  11   9   0    2.81    0.34
  11   9   0    2.56    0.34
 -12  -9   0    1.34    0.42
  12   9   0    1.39    0.29
  12   9   0    1.44    0.32
 -13  -9   0   -0.88    0.40
  13   9   0   -0.41    0.31
  13   9   0   -0.22    0.28
  14   9   0    0.53    0.34
  -7  10   0    0.26    0.30
  -6  10   0    0.92    0.32
  -6  10   0    0.58    0.41
   5 -10   0    1.17    0.48
  -5  10   0    1.43    0.32
  -5  10   0    1.29    0.41
   4 -10   0    3.44    0.52
  -4  10   0    3.77    0.50
  -4  10   0    4.48    0.37
  -4  10   0    3.95    0.47
  -3  10   0    8.30    0.53
  -3  10   0    8.03    0.39
   2 -10   0   15.64    0.65
  -2  10   0   15.56    0.84
  -2  10   0   16.05    0.75
   1 -10   0    0.26    0.18
  -1  10   0    0.53    0.18
  -1  10   0    0.55    0.22
   0 -10   0    1.44    0.22
   0  10   0    1.44    0.22
   0  10   0    1.31    0.27
  -1 -10   0   15.63    0.73
   1  10   0   15.59    0.63
   1  10   0   16.50    0.85
  -2 -10   0    7.91    0.50
   2  10   0    8.22    0.57
   2  10   0    9.01    0.44
  -3 -10   0    3.20    0.37
   3  10   0    3.91    0.42
   3  10   0    4.05    0.31
  -4 -10   0   23.12    0.98
   4  10   0   23.78    1.02
   4  10   0   22.10    0.94
  -5 -10   0    0.16    0.18
   5  10   0    0.17    0.20
   5  10   0    0.09    0.07
  -6 -10   0   16.34    0.64
  -6 -10   0   17.82    0.85
   6  10   0   16.20    0.83
   6  10   0   16.01    0.62
  -7 -10   0    0.52    0.24
  -7 -10   0    0.55    0.15
  -7 -10   0    0.57    0.22
   7  10   0    0.55    0.13
   7  10   0    0.28    0.21
  -8 -10   0   14.01    0.78
  -8 -10   0   14.44    0.81
  -8 -10   0   16.43    0.67
   8  10   0   13.11    0.73
   8  10   0   14.58    0.62
  -9 -10   0    0.47    0.23
  -9 -10   0    0.23    0.27
  -9 -10   0    0.37    0.27
   9  10   0    0.15    0.22
   9  10   0    0.21    0.15
 -10 -10   0    2.25    0.42
 -10 -10   0    3.87    0.55
 -10 -10   0    3.95    0.48
  10  10   0    3.68    0.37
  10  10   0    3.26    0.45
 -11 -10   0    2.90    0.44
 -11 -10   0    3.36    0.42
  11  10   0    3.43    0.49
  11  10   0    3.04    0.42
 -12 -10   0   -0.51    0.39
  12  10   0   -0.48    0.30
  12  10   0   -0.17    0.24
  13  10   0    0.73    0.37
  13  10   0    0.73    0.31
  -6  11   0    1.13    0.52
  -5  11   0    4.48    0.60
  -5  11   0    5.00    0.57
  -4  11   0   -0.12    0.26
  -4  11   0    0.45    0.38
  -3  11   0    0.32    0.22
  -3  11   0   -0.09    0.32
   2 -11   0    4.37    0.38
  -2  11   0    4.66    0.56
  -2  11   0    4.25    0.39
   1 -11   0    7.78    0.49
  -1  11   0    8.30    0.65
  -1  11   0    8.17    0.50
   0 -11   0    2.25    0.30
   0  11   0    1.68    0.34
   0  11   0    2.29    0.29
  -1 -11   0    1.49    0.26
   1  11   0    1.27    0.20
   1  11   0    1.30    0.28
   1  11   0    1.02    0.15
  -2 -11   0    4.14    0.44
   2  11   0    4.08    0.47
   2  11   0    5.41    0.35
  -3 -11   0   -0.07    0.20
   3  11   0   -0.28    0.21
   3  11   0    0.20    0.17
  -4 -11   0    0.09    0.21
   4  11   0    0.02    0.16
  -5 -11   0   15.94    0.83
  -6 -11   0    2.71    0.37
   6  11   0    2.56    0.19
  -7 -11   0    0.37    0.27
   7  11   0    0.87    0.14
  -8 -11   0    2.58    0.39
   8  11   0    2.60    0.27
  -9 -11   0    1.38    0.36
  -9 -11   0    2.64    0.31
  -9 -11   0    2.58    0.47
   9  11   0    2.00    0.25
 -10 -11   0    7.94    0.74
 -10 -11   0    9.14    0.61
  10  11   0    7.79    0.52
 -11 -11   0    0.73    0.34
 -11 -11   0   -0.08    0.37
  11  11   0    0.24    0.22
 -12 -11   0    0.34    0.41
  12  11   0    0.83    0.27
 -13 -11   0   -0.18    0.52
  13  11   0    0.48    0.34
  13  11   0   -0.33    0.40
  -4  12   0    0.68    0.34
  -4  12   0    1.19    0.48
  -3  12   0    4.53    0.61
  -3  12   0    3.65    0.49
  -2  12   0    0.31    0.35
  -2  12   0    0.23    0.24
   1 -12   0    0.50    0.24
  -1  12   0    0.60    0.34
   0 -12   0   -0.10    0.22
   0  12   0    0.14    0.28
   0  12   0   -0.11    0.17
  -1 -12   0    4.38    0.49
   1  12   0    4.07    0.36
   1  12   0    3.89    0.52
  -2 -12   0    0.15    0.23
   2  12   0   -0.15    0.17
   2  12   0   -0.20    0.24
   2  12   0   -0.23    0.14
  -3 -12   0    3.45    0.42
   3  12   0    3.90    0.49
   3  12   0    3.52    0.38
  -4 -12   0    7.15    0.61
   4  12   0    6.38    0.61
   4  12   0    7.56    0.51
  -5 -12   0    2.65    0.42
   5  12   0    2.47    0.38
   5  12   0    2.91    0.44
  -6 -12   0    0.30    0.28
   6  12   0    0.38    0.09
   6  12   0   -0.07    0.25
  -7 -12   0    2.86    0.43
  -7 -12   0    4.07    0.54
   7  12   0    3.28    0.25
   7  12   0    3.26    0.43
  -8 -12   0    2.60    0.45
  -8 -12   0    3.52    0.52
   8  12   0    3.76    0.53
   8  12   0    2.63    0.28
  -9 -12   0    0.19    0.33
  -9 -12   0    0.22    0.24
   9  12   0    0.14    0.31
   9  12   0    0.65    0.19
 -10 -12   0   -0.28    0.35
 -10 -12   0   -0.46    0.28
  10  12   0   -0.02    0.34
  10  12   0    0.38    0.20
 -11 -12   0    7.25    0.83
 -11 -12   0    5.11    0.65
  11  12   0    5.44    0.69
  11  12   0    6.11    0.52
 -12 -12   0    0.47    0.45
 -12 -12   0    0.82    0.50
  12  12   0    0.88    0.31
  12  12   0    0.11    0.39
  -3  13   0    0.81    0.36
  -3  13   0    1.17    0.54
  -2  13   0    1.12    0.32
  -1  13   0    1.58    0.36
  -1  13   0    1.76    0.46
   0 -13   0   -0.24    0.30
   0  13   0   -0.51    0.34
   0  13   0    0.18    0.22
  -1 -13   0    5.93    0.61
   1  13   0    7.58    0.69
   1  13   0    6.12    0.45
  -2 -13   0    2.13    0.39
   2  13   0    1.62    0.39
   2  13   0    2.12    0.30
   2  13   0    1.75    0.22
  -3 -13   0    0.59    0.32
   3  13   0    1.09    0.24
   3  13   0    0.56    0.21
   3  13   0    0.00    0.31
  -4 -13   0    1.86    0.38
   4  13   0    1.71    0.40
   4  13   0    2.82    0.41
  -5 -13   0    2.52    0.44
   5  13   0    3.10    0.45
   5  13   0    2.68    0.44
  -6 -13   0    1.51    0.39
   6  13   0    2.11    0.36
   6  13   0    1.84    0.41
  -7 -13   0    0.17    0.35
   7  13   0    0.07    0.33
   7  13   0    0.15    0.12
  -8 -13   0    0.59    0.40
   8  13   0    0.85    0.36
   8  13   0    0.46    0.17
  -9 -13   0    0.39    0.40
   9  13   0    0.52    0.19
   9  13   0    0.76    0.38
 -10 -13   0    5.54    0.82
  10  13   0    5.39    0.47
  10  13   0    6.14    0.74
 -11 -13   0    0.03    0.39
 -11 -13   0    0.17    0.50
  11  13   0    0.17    0.27
  11  13   0   -0.32    0.43
 -12 -13   0    1.70    0.60
  12  13   0    1.59    0.35
  12  13   0    0.79    0.47
  -1  14   0   -0.47    0.51
  -1  14   0    0.12    0.25
   0  14   0    0.33    0.47
   0  14   0    0.58    0.27
  -1 -14   0   -0.34    0.41
   1  14   0   -0.38    0.39
   1  14   0    0.29    0.25
  -2 -14   0   -0.15    0.35
   2  14   0    0.27    0.38
  -3 -14   0    3.73    0.51
   3  14   0    3.73    0.39
   3  14   0    2.58    0.41
  -4 -14   0    3.62    0.52
   4  14   0    3.16    0.39
   4  14   0    3.13    0.37
  -5 -14   0    0.08    0.37
   5  14   0    0.08    0.29
   5  14   0    0.11    0.19
   6  14   0    1.57    0.35
  -7 -14   0    1.35    0.49
  -8 -14   0    0.62    0.52
   8  14   0    0.40    0.16
   9  14   0    0.06    0.20
  10  14   0    1.21    0.29
 -11 -14   0    1.08    0.62
  11  14   0    1.86    0.54
  11  14   0    1.40    0.34
   1  15   0    0.15    0.30
   1  15   0    1.03    0.57
  -2 -15   0   -0.40    0.48
   2  15   0    0.15    0.28
   2  15   0   -0.14    0.49
  -3 -15   0    1.22    0.49
   3  15   0    1.33    0.32
   3  15   0    1.60    0.51
   4  15   0    1.27    0.48
   4  15   0    1.84    0.35
   5  15   0    0.88    0.37
   5  15   0    0.04    0.43
   5  15   0    0.46    0.24
   6  15   0    1.91    0.32
   6  15   0    2.14    0.50
   6  15   0    2.08    0.42
  -7 -15   0    1.38    0.52
   7  15   0    1.06    0.40
   7  15   0    0.49    0.48
   7  15   0    0.87    0.27
  -8 -15   0    4.14    0.64
   8  15   0    3.83    0.55
   8  15   0    4.11    0.46
   8  15   0    3.89    0.65
  -9 -15   0    1.41    0.63
   9  15   0    1.91    0.56
   9  15   0    1.33    0.49
   9  15   0    0.52    0.29
 -10 -15   0    0.93    0.66
  10  15   0    1.23    0.60
   4  16   0    0.66    0.31
   5  16   0    1.98    0.40
   7  16   0    0.13    0.30
   7  16   0    0.67    0.48
   5  16  -1    0.61    0.31
   4  16  -1    3.48    0.47
   9  15  -1   -0.10    0.52
  -9 -15   1   -0.71    0.51
   8  15  -1   -0.54    0.42
   8  15  -1    0.60    0.52
  -8 -15   1    0.75    0.58
   7  15  -1    0.49    0.48
   7  15  -1   -0.49    0.38
  -7 -15   1   -0.63    0.48
   6  15  -1    0.47    0.47
   6  15  -1    0.65    0.38
   5  15  -1    1.43    0.37
   5  15  -1    0.59    0.46
   5  15  -1    1.23    0.26
   4  15  -1   -0.30    0.42
   3  15  -1    5.06    0.52
   3  15  -1    5.55    0.77
   2  15  -1    1.18    0.48
  -2 -15   1    0.98    0.54
   1  15  -1    0.82    0.29
   1  15  -1    1.14    0.56
  11  14  -1    0.36    0.50
  11  14  -1    0.06    0.31
 -11 -14   1    0.23    0.59
  10  14  -1    0.58    0.26
  10  14  -1    0.18    0.45
   9  14  -1    0.15    0.21
   9  14  -1    0.62    0.50
   8  14  -1    0.34    0.18
  -8 -14   1    0.43    0.46
   7  14  -1    2.61    0.46
  -7 -14   1    2.92    0.46
   6  14  -1    0.43    0.31
   5  14  -1    0.29    0.28
   4  14  -1    5.17    0.50
  -4 -14   1    4.99    0.72
   3  14  -1    0.55    0.39
   3  14  -1    0.72    0.25
   3  14  -1    1.07    0.25
  -3 -14   1    0.97    0.39
   2  14  -1    0.42    0.25
   2  14  -1   -0.05    0.39
  -2 -14   1   -0.74    0.38
   1  14  -1    0.31    0.24
   1  14  -1    0.72    0.41
  -1 -14   1    0.21    0.37
   0  14  -1    0.14    0.26
   0  14  -1    0.93    0.45
  -1  14  -1    0.83    0.51
  -1  14  -1    0.70    0.30
  12  13  -1    0.46    0.34
  12  13  -1    0.17    0.49
 -12 -13   1    0.12    0.57
  11  13  -1    4.40    0.52
  11  13  -1    3.93    0.57
 -11 -13   1    3.69    0.64
  10  13  -1    1.50    0.44
  10  13  -1    1.43    0.26
 -10 -13   1    1.52    0.48
   9  13  -1    0.76    0.38
   9  13  -1    0.14    0.19
  -9 -13   1    0.47    0.37
   8  13  -1   -0.08    0.35
   8  13  -1    0.37    0.16
  -8 -13   1    1.20    0.45
   7  13  -1    0.18    0.34
   7  13  -1    0.29    0.14
  -7 -13   1   -0.18    0.30
   6  13  -1    0.51    0.34
  -6 -13   1    0.39    0.35
   5  13  -1    1.53    0.31
   5  13  -1    1.60    0.39
  -5 -13   1    2.00    0.39
   4  13  -1    1.56    0.28
   4  13  -1    0.56    0.32
  -4 -13   1    1.57    0.39
   3  13  -1    6.99    0.64
   3  13  -1    7.25    0.48
  -3 -13   1    8.24    0.67
   2  13  -1    0.77    0.17
   2  13  -1    0.21    0.34
  -2 -13   1    0.96    0.33
   1  13  -1    1.80    0.39
   1  13  -1    1.95    0.28
  -1 -13   1    1.73    0.39
   0  13  -1    0.74    0.24
   0  13  -1    0.66    0.37
   0 -13   1    0.81    0.34
  -1  13  -1    0.28    0.23
  -1  13  -1    0.36    0.38
   1 -13   1    0.33    0.31
  -2  13  -1    0.49    0.28
  -3  13  -1    0.29    0.26
  -3  13  -1    0.33    0.52
  12  12  -1    0.20    0.41
  12  12  -1    0.43    0.32
 -12 -12   1    1.30    0.54
  11  12  -1    0.76    0.41
  11  12  -1   -0.19    0.24
 -11 -12   1   -0.77    0.38
 -11 -12   1    0.39    0.44
  10  12  -1    4.31    0.60
  10  12  -1    4.42    0.44
 -10 -12   1    4.03    0.55
 -10 -12   1    4.92    0.59
   9  12  -1    0.52    0.20
   9  12  -1   -0.05    0.31
  -9 -12   1    0.69    0.37
   8  12  -1    6.76    0.40
   8  12  -1    6.20    0.60
  -8 -12   1    7.20    0.69
   7  12  -1    0.15    0.12
   7  12  -1   -0.52    0.25
  -7 -12   1   -0.21    0.30
  -7 -12   1   -0.12    0.25
   6  12  -1    2.67    0.21
   6  12  -1    3.08    0.42
  -6 -12   1    2.84    0.43
   5  12  -1    2.18    0.39
  -5 -12   1    1.83    0.36
   4  12  -1    5.92    0.60
   4  12  -1    5.75    0.46
  -4 -12   1    5.74    0.61
   3  12  -1   -0.02    0.18
   3  12  -1   -0.12    0.25
  -3 -12   1    0.06    0.27
   2  12  -1    0.36    0.16
   2  12  -1    0.58    0.31
  -2 -12   1    0.36    0.24
   1  12  -1    0.30    0.29
  -1 -12   1    0.30    0.25
   0  12  -1    1.42    0.22
   0  12  -1    0.69    0.34
   0 -12   1    1.36    0.28
  -1  12  -1    0.77    0.36
   1 -12   1    0.91    0.28
  -2  12  -1    0.77    0.35
  -2  12  -1    0.42    0.25
  -3  12  -1    4.39    0.49
  -3  12  -1    4.20    0.56
  -4  12  -1    0.24    0.46
  -4  12  -1   -0.07    0.27
  13  11  -1    2.51    0.42
 -13 -11   1    3.99    0.65
  12  11  -1    0.51    0.29
 -12 -11   1    0.16    0.42
  11  11  -1    4.32    0.58
  11  11  -1    3.90    0.47
 -11 -11   1    3.69    0.55
 -11 -11   1    4.08    0.48
  10  11  -1    0.53    0.30
 -10 -11   1    0.22    0.28
   9  11  -1    1.82    0.25
   9  11  -1    1.78    0.35
  -9 -11   1    1.83    0.32
  -9 -11   1    1.35    0.42
   8  11  -1    2.00    0.26
   8  11  -1    2.29    0.37
  -8 -11   1    2.34    0.29
  -8 -11   1    1.87    0.38
   7  11  -1    7.48    0.64
   7  11  -1    7.85    0.39
  -7 -11   1    7.94    0.63
  -7 -11   1    7.51    0.62
   6  11  -1   -0.05    0.22
   6  11  -1   -0.03    0.09
  -6 -11   1   -0.31    0.22
   5  11  -1   14.34    0.84
   5  11  -1   14.43    0.52
  -5 -11   1   15.66    0.81
   4  11  -1    5.33    0.40
   4  11  -1    5.51    0.50
  -4 -11   1    4.52    0.48
   3  11  -1    8.95    0.60
   3  11  -1    8.68    0.48
  -3 -11   1    9.32    0.61
   2  11  -1    1.01    0.26
   2  11  -1    0.52    0.16
  -2 -11   1    0.84    0.24
   1  11  -1    6.71    0.55
   1  11  -1    4.93    0.28
  -1 -11   1    6.28    0.47
   0  11  -1    0.67    0.18
   0  11  -1    0.53    0.27
  -1  11  -1    0.55    0.18
  -1  11  -1    0.58    0.29
   1 -11   1    0.50    0.22
  -2  11  -1    1.53    0.25
  -2  11  -1    1.74    0.35
  -3  11  -1    1.50    0.33
  -3  11  -1    1.69    0.36
  -4  11  -1    0.27    0.37
  -4  11  -1    0.10    0.20
  -5  11  -1    1.06    0.30
  -5  11  -1    0.87    0.44
  -6  11  -1    0.28    0.49
  -6  11  -1    0.66    0.35
  13  10  -1    1.06    0.37
 -13 -10   1    0.85    0.46
  12  10  -1    1.00    0.29
  12  10  -1    0.01    0.29
 -12 -10   1    0.25    0.42
  11  10  -1    0.11    0.27
  11  10  -1    0.34    0.21
 -11 -10   1    0.36    0.34
 -11 -10   1    0.77    0.33
  10  10  -1    0.39    0.26
 -10 -10   1    0.20    0.31
 -10 -10   1    0.61    0.26
 -10 -10   1   -0.35    0.35
   9  10  -1    1.84    0.24
   9  10  -1    1.69    0.33
  -9 -10   1    2.52    0.39
  -9 -10   1    1.46    0.34
  -9 -10   1    2.07    0.31
   8  10  -1    1.53    0.30
   8  10  -1    1.61    0.21
  -8 -10   1    1.30    0.32
  -8 -10   1    1.52    0.32
  -8 -10   1    1.91    0.26
   7  10  -1    4.34    0.44
   7  10  -1    3.48    0.28
  -7 -10   1    4.61    0.34
  -7 -10   1    3.88    0.43
  -7 -10   1    3.87    0.46
   6  10  -1    1.70    0.31
   6  10  -1    1.42    0.19
  -6 -10   1    1.88    0.31
   5  10  -1    0.04    0.24
  -5 -10   1    0.03    0.20
   4  10  -1    2.20    0.32
   4  10  -1    2.29    0.14
  -4 -10   1    2.00    0.30
   3  10  -1    0.05    0.13
   3  10  -1    0.41    0.21
  -3 -10   1   -0.10    0.18
   2  10  -1   14.60    0.76
   2  10  -1   14.67    0.62
  -2 -10   1   14.65    0.71
   1  10  -1   -0.11    0.10
   1  10  -1   -0.18    0.23
   0  10  -1    1.84    0.29
   0 -10   1    1.67    0.24
  -1  10  -1    1.14    0.21
  -1  10  -1    1.28    0.29
   1 -10   1    1.19    0.20
  -2  10  -1    3.54    0.48
  -2  10  -1    5.07    0.38
   2 -10   1    4.57    0.35
  -3  10  -1    0.76    0.15
  -3  10  -1    0.78    0.20
  -4  10  -1    0.00    0.31
  -4  10  -1    0.44    0.18
   4 -10   1   -0.08    0.35
  -5  10  -1    0.36    0.36
  -5  10  -1    0.34    0.26
  -6  10  -1   -0.08    0.39
  -6  10  -1    0.34    0.26
  -7  10  -1    3.03    0.49
  -7  10  -1    2.19    0.52
  13   9  -1    2.38    0.40
 -13  -9   1    2.71    0.50
  12   9  -1    0.25    0.26
  12   9  -1    0.43    0.26
 -12  -9   1    0.53    0.35
  11   9  -1    1.99    0.34
  11   9  -1    2.35    0.33
 -11  -9   1    2.39    0.39
 -11  -9   1    2.40    0.39
  10   9  -1    0.22    0.22
 -10  -9   1    0.25    0.31
 -10  -9   1    0.09    0.24
 -10  -9   1   -0.03    0.25
   9   9  -1    0.99    0.20
   9   9  -1    1.12    0.25
  -9  -9   1    1.22    0.30
  -9  -9   1    0.74    0.27
  -9  -9   1    1.74    0.26
   8   9  -1    1.23    0.26
   8   9  -1    1.08    0.17
  -8  -9   1    0.94    0.27
  -8  -9   1    1.63    0.28
   7   9  -1    6.10    0.36
   7   9  -1    4.64    0.48
  -7  -9   1    5.46    0.51
  -7  -9   1    6.01    0.38
  -7  -9   1    6.34    0.47
   6   9  -1   16.59    0.63
   6   9  -1   16.47    0.77
  -6  -9   1   17.12    0.81
  -6  -9   1   15.86    0.66
   5   9  -1    1.21    0.24
   5   9  -1    1.06    0.13
  -5  -9   1    1.13    0.23
   4   9  -1   21.69    0.93
   4   9  -1   21.54    0.73
  -4  -9   1   21.36    0.92
   3   9  -1    5.06    0.42
  -3  -9   1    4.34    0.37
   2   9  -1   25.18    0.93
   2   9  -1   25.81    1.06
   1   9  -1   14.33    0.55
   1   9  -1   14.52    0.71
  -1  -9   1   13.67    0.64
   0   9  -1   11.76    0.64
   0  -9   1   11.56    0.55
  -1   9  -1    0.18    0.20
  -2   9  -1    4.54    0.44
  -2   9  -1    3.77    0.31
  -2   9  -1    3.96    0.22
   2  -9   1    3.98    0.30
  -3   9  -1    0.99    0.27
  -3   9  -1    1.51    0.20
  -3   9  -1    1.42    0.22
  -4   9  -1    1.40    0.19
  -4   9  -1    1.54    0.26
  -4   9  -1    1.37    0.29
   4  -9   1    1.21    0.35
  -5   9  -1   -0.09    0.27
   5  -9   1   -0.11    0.35
  -6   9  -1    1.21    0.35
  -6   9  -1    1.10    0.27
  -6   9  -1    1.35    0.29
   6  -9   1    1.33    0.51
  -7   9  -1    0.07    0.38
  -7   9  -1    0.07    0.31
  -7   9  -1    0.03    0.27
  -8   9  -1    3.18    0.49
  13   8  -1    6.59    0.62
 -13  -8   1    6.13    0.67
  12   8  -1    1.66    0.28
  12   8  -1    1.76    0.28
 -12  -8   1    1.35    0.36
  11   8  -1    0.58    0.22
  11   8  -1    0.43    0.21
 -11  -8   1    0.78    0.29
 -11  -8   1    0.25    0.33
 -11  -8   1    0.29    0.29
  10   8  -1    3.33    0.37
  10   8  -1    3.84    0.37
 -10  -8   1    3.33    0.44
 -10  -8   1    3.56    0.48
 -10  -8   1    3.42    0.40
   9   8  -1   39.34    1.45
   9   8  -1   40.93    1.46
  -9  -8   1   40.82    1.54
  -9  -8   1   38.68    1.57
  -9  -8   1   40.88    1.49
   8   8  -1    4.76    0.43
   8   8  -1    5.90    0.38
  -8  -8   1    5.18    0.49
  -8  -8   1    5.73    0.40
  -8  -8   1    5.48    0.45
   7   8  -1   12.95    0.55
   7   8  -1   12.89    0.62
  -7  -8   1   12.32    0.66
  -7  -8   1   11.89    0.64
  -7  -8   1   13.12    0.58
   6   8  -1    8.40    0.48
   6   8  -1    8.31    0.39
  -6  -8   1    8.92    0.52
  -6  -8   1    7.93    0.48
  -6  -8   1    8.26    0.41
   5   8  -1    1.81    0.17
   5   8  -1    1.98    0.27
  -5  -8   1    1.43    0.22
  -5  -8   1    1.35    0.18
   4   8  -1    9.02    0.50
   4   8  -1    8.40    0.34
  -4  -8   1    8.18    0.48
   3   8  -1    0.69    0.09
   3   8  -1    0.90    0.20
  -3  -8   1    0.52    0.14
   2   8  -1   11.87    0.52
   2   8  -1   12.83    0.62
  -2  -8   1   12.38    0.57
   1   8  -1    9.03    0.38
   1   8  -1    8.27    0.50
  -1  -8   1    8.38    0.44
   0   8  -1   -0.05    0.14
  -1   8  -1    7.99    0.31
  -1   8  -1    8.86    0.50
   1  -8   1    7.99    0.40
  -2   8  -1    1.08    0.14
  -2   8  -1    1.22    0.22
  -2   8  -1    1.03    0.17
   2  -8   1    1.22    0.16
  -3   8  -1    1.11    0.14
  -3   8  -1    1.05    0.19
  -3   8  -1    0.67    0.23
  -4   8  -1    0.64    0.14
  -4   8  -1    0.71    0.22
  -4   8  -1    0.40    0.17
   4  -8   1    0.65    0.29
  -5   8  -1    1.31    0.26
  -5   8  -1    1.17    0.27
   5  -8   1    1.52    0.23
   5  -8   1    1.18    0.34
  -6   8  -1   -0.27    0.25
  -6   8  -1    0.16    0.20
  -6   8  -1   -0.05    0.19
   6  -8   1    0.09    0.19
   6  -8   1   -0.38    0.34
  -7   8  -1    0.54    0.27
  -7   8  -1    0.20    0.28
  -7   8  -1    0.18    0.26
   7  -8   1   -0.18    0.21
   7  -8   1   -0.16    0.45
   7  -8   1    0.40    0.25
  -8   8  -1    0.14    0.37
  -8   8  -1    0.56    0.32
  -8   8  -1   -0.32    0.34
   8  -8   1    0.77    0.32
   8  -8   1   -0.14    0.54
  13   7  -1   -0.02    0.27
  12   7  -1    1.65    0.23
  12   7  -1    1.83    0.28
 -12  -7   1    1.77    0.41
 -12  -7   1    2.58    0.36
  11   7  -1    4.23    0.43
  11   7  -1    4.62    0.37
 -11  -7   1    4.99    0.53
 -11  -7   1    4.46    0.52
 -11  -7   1    5.68    0.61
  10   7  -1    5.09    0.38
  10   7  -1    5.79    0.42
 -10  -7   1    5.75    0.48
 -10  -7   1    5.82    0.55
 -10  -7   1    6.21    0.50
   9   7  -1    0.43    0.15
   9   7  -1    0.37    0.18
  -9  -7   1    0.32    0.22
  -9  -7   1    0.53    0.19
  -9  -7   1    0.36    0.17
   8   7  -1   20.55    0.82
   8   7  -1   20.42    0.83
  -8  -7   1   21.46    0.89
  -8  -7   1   19.76    0.83
  -8  -7   1   20.20    0.93
   7   7  -1   20.56    0.79
   7   7  -1   20.13    0.82
  -7  -7   1   19.82    0.89
  -7  -7   1   20.57    0.84
  -7  -7   1   20.79    0.86
   6   7  -1   -0.02    0.15
   6   7  -1    0.18    0.09
  -6  -7   1    0.16    0.11
  -6  -7   1    0.21    0.12
  -6  -7   1    0.34    0.17
   5   7  -1    1.38    0.21
   5   7  -1    1.28    0.15
  -5  -7   1    1.22    0.16
  -5  -7   1    1.02    0.17
   4   7  -1    0.09    0.06
   4   7  -1    0.20    0.13
  -4  -7   1    0.08    0.10
  -4  -7   1    0.12    0.07
   3   7  -1   14.28    0.63
   3   7  -1   13.14    0.48
  -3  -7   1   13.87    0.61
   2   7  -1    9.56    0.49
  -2  -7   1    9.88    0.47
   1   7  -1    1.09    0.19
   1   7  -1    1.10    0.13
   0   7  -1    0.91    0.18
   0  -7   1    0.91    0.14
  -1   7  -1    8.28    0.30
  -1   7  -1    9.12    0.47
   1  -7   1    6.64    0.36
  -2   7  -1    8.25    0.46
  -2   7  -1    7.88    0.33
   2  -7   1    7.67    0.35
  -3   7  -1    8.33    0.44
  -3   7  -1    8.37    0.37
  -3   7  -1    8.53    0.49
  -4   7  -1    0.06    0.14
  -4   7  -1    0.06    0.11
   4  -7   1   -0.12    0.18
   4  -7   1   -0.14    0.11
   4  -7   1   -0.18    0.08
  -5   7  -1    3.75    0.33
  -5   7  -1    3.58    0.31
  -5   7  -1    3.62    0.36
   5  -7   1    3.88    0.30
   5  -7   1    3.08    0.26
   5  -7   1    3.29    0.43
  -6   7  -1    4.13    0.40
  -6   7  -1    4.22    0.43
  -6   7  -1    4.33    0.37
   6  -7   1    6.18    0.61
   6  -7   1    4.27    0.36
   6  -7   1    5.32    0.38
  -7   7  -1    0.10    0.21
  -7   7  -1    0.36    0.24
  -7   7  -1    0.02    0.24
   7  -7   1    0.31    0.37
   7  -7   1    0.29    0.20
  -8   7  -1    0.41    0.28
  -8   7  -1    0.39    0.30
  -8   7  -1   -0.31    0.26
   8  -7   1   -0.18    0.43
   8  -7   1   -0.06    0.23
   8  -7   1    0.40    0.30
  -9   7  -1    0.06    0.30
  -9   7  -1   -0.16    0.41
   9  -7   1    0.90    0.62
   9  -7   1    0.53    0.33
  13   6  -1    1.37    0.32
 -13  -6   1   -0.40    0.43
  12   6  -1    3.30    0.44
 -12  -6   1    4.74    0.62
 -12  -6   1    4.71    0.49
  11   6  -1    0.16    0.18
  11   6  -1    0.43    0.15
 -11  -6   1    0.05    0.24
 -11  -6   1    0.78    0.28
 -11  -6   1    0.39    0.23
  10   6  -1    0.13    0.15
  10   6  -1    0.12    0.13
 -10  -6   1    0.04    0.23
 -10  -6   1   -0.15    0.19
 -10  -6   1    0.02    0.20
   9   6  -1   12.65    0.61
   9   6  -1   12.68    0.54
  -9  -6   1   12.41    0.63
  -9  -6   1   12.97    0.64
  -9  -6   1   11.43    0.65
   8   6  -1    1.18    0.17
   8   6  -1    1.04    0.17
  -8  -6   1    1.14    0.22
  -8  -6   1    0.80    0.17
  -8  -6   1    1.70    0.25
   7   6  -1    1.68    0.22
   7   6  -1    1.96    0.21
  -7  -6   1    1.78    0.26
  -7  -6   1    1.70    0.25
   6   6  -1   21.14    0.83
   6   6  -1   22.77    0.81
  -6  -6   1   21.73    0.85
  -6  -6   1   20.35    0.89
  -6  -6   1   21.98    0.82
   5   6  -1    3.79    0.27
   5   6  -1    3.84    0.23
  -5  -6   1    3.81    0.24
   4   6  -1    8.05    0.33
   4   6  -1    7.95    0.42
  -4  -6   1    8.09    0.43
  -4  -6   1    8.02    0.34
   3   6  -1   43.51    1.47
   3   6  -1   41.37    1.35
  -3  -6   1   42.32    1.47
   2   6  -1    3.24    0.35
   1   6  -1   89.64    2.89
  -1  -6   1   88.69    2.85
   0   6  -1   22.20    0.70
   0   6  -1   22.59    0.86
   0  -6   1   21.72    0.80
  -1   6  -1   20.67    0.79
  -1   6  -1   20.40    0.66
   1  -6   1   18.76    0.71
  -2   6  -1    0.70    0.15
  -2   6  -1    0.65    0.09
   2  -6   1    0.62    0.10
  -3   6  -1   13.43    0.52
  -3   6  -1   13.72    0.58
  -3   6  -1   13.36    0.61
   3  -6   1   12.31    0.47
   3  -6   1   13.85    0.53
  -4   6  -1    0.11    0.10
  -4   6  -1    0.03    0.12
  -4   6  -1   -0.06    0.12
   4  -6   1    0.04    0.09
   4  -6   1   -0.06    0.16
   4  -6   1    0.09    0.09
  -5   6  -1   25.53    1.02
  -5   6  -1   27.20    1.05
  -5   6  -1   26.78    0.98
   5  -6   1   28.07    1.15
   5  -6   1   27.72    0.99
   5  -6   1   23.69    0.95
  -6   6  -1   20.93    0.85
  -6   6  -1   21.85    0.86
  -6   6  -1   21.60    0.92
   6  -6   1   20.50    0.99
   6  -6   1   21.63    0.85
   6  -6   1   18.89    0.83
  -7   6  -1    0.95    0.25
  -7   6  -1    1.15    0.22
  -7   6  -1    0.80    0.21
   7  -6   1    1.10    0.21
   7  -6   1    1.13    0.34
  -8   6  -1    1.12    0.25
  -8   6  -1    1.01    0.26
  -8   6  -1    0.86    0.29
   8  -6   1    0.90    0.38
   8  -6   1    1.18    0.26
  -9   6  -1    0.56    0.34
  -9   6  -1    0.22    0.27
   9  -6   1   -0.04    0.48
   9  -6   1   -0.14    0.26
 -10   6  -1    0.08    0.38
  10  -6   1    0.81    0.35
  13   5  -1    0.73    0.29
 -13  -5   1    0.28    0.44
  12   5  -1    0.96    0.25
 -12  -5   1    1.16    0.38
  11   5  -1    4.89    0.44
 -11  -5   1    5.56    0.54
 -11  -5   1    5.90    0.53
  10   5  -1    2.01    0.26
  10   5  -1    2.60    0.22
 -10  -5   1    2.55    0.33
 -10  -5   1    2.46    0.33
 -10  -5   1    2.42    0.33
   9   5  -1    0.45    0.13
   9   5  -1    0.81    0.18
  -9  -5   1    0.76    0.20
  -9  -5   1    1.09    0.22
  -9  -5   1    0.94    0.24
   8   5  -1    0.25    0.10
   8   5  -1    0.31    0.13
  -8  -5   1    0.04    0.14
  -8  -5   1   -0.06    0.13
  -8  -5   1    0.31    0.14
   7   5  -1   11.15    0.51
   7   5  -1   10.75    0.48
  -7  -5   1   11.52    0.54
  -7  -5   1   10.63    0.57
  -7  -5   1   11.26    0.53
   6   5  -1    1.53    0.17
   6   5  -1    1.34    0.18
  -6  -5   1    1.12    0.16
  -6  -5   1    0.97    0.16
  -6  -5   1    0.77    0.16
   5   5  -1   -0.01    0.05
   5   5  -1   -0.05    0.08
  -5  -5   1    0.07    0.09
  -5  -5   1    0.02    0.08
   4   5  -1    2.23    0.18
   4   5  -1    2.13    0.26
  -4  -5   1    2.20    0.18
  -4  -5   1    2.16    0.28
   3   5  -1    0.18    0.09
   3   5  -1    0.08    0.06
   3   5  -1    0.10    0.05
  -3  -5   1    0.09    0.05
   2   5  -1    0.82    0.07
   2   5  -1    0.94    0.15
   2   5  -1    0.94    0.14
  -2  -5   1    0.67    0.10
   1   5  -1   43.81    1.42
   1   5  -1   44.06    1.46
   1   5  -1   42.49    1.33
  -1  -5   1   41.75    1.43
   0   5  -1    4.70    0.29
   0   5  -1    5.12    0.21
   0   5  -1    5.51    0.19
   0  -5   1    4.76    0.25
  -1   5  -1   36.31    1.27
  -1   5  -1   37.35    1.13
   1  -5   1   32.88    1.16
  -2   5  -1    0.48    0.12
   2  -5   1    0.39    0.08
   2  -5   1    0.46    0.07
  -3   5  -1    1.95    0.19
  -3   5  -1    2.13    0.16
  -3   5  -1    2.33    0.22
   3  -5   1    2.29    0.16
   3  -5   1    2.35    0.17
  -4   5  -1    8.36    0.44
  -4   5  -1    8.83    0.44
   4  -5   1    9.04    0.51
   4  -5   1    8.70    0.40
  -5   5  -1   67.38    2.32
  -5   5  -1   70.42    2.27
  -5   5  -1   68.54    2.26
   5  -5   1   71.34    2.27
   5  -5   1   67.72    2.42
  -6   5  -1   40.89    1.51
  -6   5  -1   41.02    1.43
  -6   5  -1   41.35    1.46
   6  -5   1   40.58    1.58
   6  -5   1   42.33    1.46
  -7   5  -1    8.04    0.43
  -7   5  -1    8.01    0.48
  -7   5  -1    8.17    0.50
   7  -5   1    7.91    0.47
   7  -5   1    8.00    0.61
  -8   5  -1    5.10    0.36
  -8   5  -1    5.95    0.46
  -8   5  -1    5.28    0.48
   8  -5   1    4.34    0.61
  -9   5  -1    0.49    0.29
  -9   5  -1    0.18    0.25
   9  -5   1    0.09    0.39
   9  -5   1    0.35    0.25
 -10   5  -1   -0.12    0.32
  10  -5   1    0.48    0.31
  10  -5   1    0.00    0.49
 -11   5  -1    1.12    0.35
  11  -5   1    1.68    0.43
  13   4  -1    0.75    0.28
 -13  -4   1    0.57    0.37
 -13  -4   1    0.87    0.44
  12   4  -1    1.51    0.28
 -12  -4   1    2.43    0.38
 -12  -4   1    1.58    0.39
  11   4  -1    7.30    0.50
 -11  -4   1    6.45    0.57
 -11  -4   1    7.44    0.58
 -11  -4   1    7.89    0.51
  10   4  -1   47.41    1.69
 -10  -4   1   44.70    1.69
 -10  -4   1   47.70    1.73
 -10  -4   1   45.78    1.63
   9   4  -1   55.95    1.91
  -9  -4   1   53.51    1.84
  -9  -4   1   53.41    1.91
  -9  -4   1   53.47    1.84
  -9  -4   1   55.23    1.93
   8   4  -1    2.71    0.25
   8   4  -1    2.81    0.19
  -8  -4   1    2.93    0.30
  -8  -4   1    2.52    0.26
  -8  -4   1    3.24    0.28
  -8  -4   1    3.12    0.30
   7   4  -1    0.13    0.08
   7   4  -1    0.09    0.08
  -7  -4   1    0.05    0.11
  -7  -4   1    0.15    0.13
  -7  -4   1   -0.01    0.11
  -7  -4   1   -0.04    0.10
   6   4  -1    0.11    0.07
   6   4  -1    0.11    0.07
  -6  -4   1   -0.02    0.09
  -6  -4   1    0.09    0.09
  -6  -4   1    0.08    0.08
   5   4  -1   16.77    0.64
   5   4  -1   17.58    0.64
  -5  -4   1   16.78    0.69
  -5  -4   1   16.93    0.66
  -5  -4   1   17.18    0.67
   4   4  -1   21.80    0.83
   4   4  -1   22.34    0.81
   4   4  -1   23.20    0.79
  -4  -4   1   22.04    0.85
  -4  -4   1   22.96    0.81
  -4  -4   1   24.11    0.81
   3   4  -1   22.88    0.79
   3   4  -1   24.34    0.86
  -3  -4   1   24.00    0.80
   2   4  -1    3.43    0.15
   2   4  -1    3.47    0.21
  -2  -4   1    3.16    0.15
  -2  -4   1    3.23    0.20
   1   4  -1   58.30    1.80
   1   4  -1   56.88    1.72
  -1  -4   1   52.36    1.79
   0   4  -1   27.32    0.90
   0   4  -1   27.53    0.86
   0   4  -1   27.24    0.84
   0  -4   1   25.05    0.90
  -1   4  -1   26.02    0.83
  -1   4  -1   25.16    0.89
  -1   4  -1   25.82    0.81
   1  -4   1   22.97    0.82
  -2   4  -1  255.10    7.81
  -2   4  -1  255.27    7.75
   2  -4   1  272.85    7.73
   2  -4   1  226.81    7.72
   2  -4   1  259.07    7.76
  -3   4  -1    0.26    0.09
  -3   4  -1    0.03    0.05
  -3   4  -1    0.04    0.07
   3  -4   1    0.05    0.06
  -4   4  -1    1.43    0.17
  -4   4  -1    1.33    0.17
   4  -4   1    1.67    0.15
   4  -4   1    1.14    0.18
  -5   4  -1   13.94    0.61
  -5   4  -1   14.23    0.59
  -5   4  -1   13.71    0.57
   5  -4   1   14.95    0.68
   5  -4   1   14.21    0.59
  -6   4  -1   32.12    1.18
  -6   4  -1   31.23    1.20
  -6   4  -1   32.29    1.12
   6  -4   1   32.56    1.28
   6  -4   1   33.50    1.18
  -7   4  -1    5.31    0.32
  -7   4  -1    5.88    0.40
  -7   4  -1    5.47    0.40
   7  -4   1    6.20    0.50
   7  -4   1    5.76    0.38
  -8   4  -1    0.08    0.13
  -8   4  -1   -0.02    0.19
  -8   4  -1    0.17    0.18
   8  -4   1    0.34    0.28
   8  -4   1    0.15    0.17
  -9   4  -1    0.28    0.24
  -9   4  -1   -0.18    0.20
   9  -4   1    0.11    0.31
   9  -4   1   -0.01    0.19
 -10   4  -1    0.10    0.25
  10  -4   1   -0.17    0.39
  10  -4   1   -0.16    0.24
 -11   4  -1    0.83    0.33
  11  -4   1   -0.01    0.33
  13   3  -1    2.88    0.39
 -13  -3   1    3.47    0.47
 -12  -3   1    2.40    0.41
 -12  -3   1    2.18    0.35
  11   3  -1   10.88    0.62
 -11  -3   1    9.46    0.67
 -11  -3   1    9.79    0.59
 -11  -3   1    9.56    0.64
  10   3  -1    1.39    0.23
 -10  -3   1    1.74    0.29
 -10  -3   1    2.01    0.28
 -10  -3   1    2.22    0.31
   9   3  -1   37.30    1.38
  -9  -3   1   35.66    1.37
  -9  -3   1   36.90    1.33
  -9  -3   1   37.03    1.39
   8   3  -1   10.54    0.52
  -8  -3   1   10.41    0.50
  -8  -3   1   10.00    0.53
  -8  -3   1   10.89    0.48
  -8  -3   1   10.39    0.52
   7   3  -1    1.85    0.13
   7   3  -1    1.94    0.21
  -7  -3   1    1.74    0.22
  -7  -3   1    1.87    0.22
  -7  -3   1    1.60    0.22
  -7  -3   1    2.15    0.21
   6   3  -1   28.66    1.03
   6   3  -1   28.79    0.94
  -6  -3   1   28.21    1.03
  -6  -3   1   28.31    1.00
  -6  -3   1   28.04    1.05
  -6  -3   1   27.47    1.00
  -6  -3   1   30.02    0.99
   5   3  -1   13.90    0.56
   5   3  -1   13.90    0.53
  -5  -3   1   13.58    0.59
  -5  -3   1   13.71    0.53
  -5  -3   1   13.62    0.54
   4   3  -1   10.68    0.42
   4   3  -1   10.19    0.44
  -4  -3   1    9.89    0.44
  -4  -3   1   10.24    0.42
  -4  -3   1   10.78    0.42
   3   3  -1    0.00    0.05
   3   3  -1    0.00    0.03
  -3  -3   1    0.04    0.04
  -3  -3   1    0.04    0.05
   2   3  -1  117.49    3.51
   2   3  -1  118.84    3.56
  -2  -3   1  112.79    3.50
  -2  -3   1  106.69    3.55
   1   3  -1    0.13    0.03
  -1  -3   1    0.15    0.05
   0   3  -1   17.05    0.58
   0  -3   1   16.79    0.58
  -1   3  -1  144.49    4.14
   1  -3   1  118.53    4.14
   1  -3   1  143.30    4.15
  -2   3  -1   63.58    2.01
   2  -3   1   65.11    2.02
  -3   3  -1    1.76    0.14
  -3   3  -1    2.01    0.16
  -3   3  -1    1.80    0.14
   3  -3   1    1.80    0.19
   3  -3   1    1.84    0.14
  -4   3  -1    0.86    0.13
  -4   3  -1    0.65    0.11
  -4   3  -1    0.77    0.11
   4  -3   1    0.60    0.10
   4  -3   1    0.87    0.17
  -5   3  -1   22.23    0.85
  -5   3  -1   21.90    0.78
  -5   3  -1   22.52    0.83
   5  -3   1   23.59    0.92
   5  -3   1   22.79    0.83
  -6   3  -1    5.18    0.27
  -6   3  -1    4.80    0.32
   6  -3   1    5.03    0.39
   6  -3   1    5.56    0.32
  -7   3  -1    2.27    0.28
  -7   3  -1    2.33    0.28
  -7   3  -1    2.59    0.20
   7  -3   1    2.71    0.27
   7  -3   1    2.55    0.37
  -8   3  -1    0.04    0.18
  -8   3  -1   -0.20    0.17
   8  -3   1    0.29    0.23
   8  -3   1    0.07    0.14
  -9   3  -1    0.33    0.20
  -9   3  -1    0.21    0.22
   9  -3   1    0.27    0.19
   9  -3   1    0.51    0.28
 -10   3  -1    0.99    0.30
 -10   3  -1    1.53    0.30
  10  -3   1    1.48    0.28
  10  -3   1    1.04    0.35
  11  -3   1    2.20    0.52
 -12   3  -1    6.02    0.72
  12  -3   1    6.88    0.72
  13   2  -1    1.49    0.35
 -13  -2   1    1.76    0.41
  12   2  -1    2.83    0.35
 -12  -2   1    4.28    0.57
 -12  -2   1    4.23    0.50
  11   2  -1    0.00    0.20
 -11  -2   1    0.31    0.25
 -11  -2   1    0.07    0.22
  10   2  -1    0.41    0.17
 -10  -2   1    0.64    0.22
 -10  -2   1    0.80    0.24
   9   2  -1    3.74    0.34
  -9  -2   1    3.31    0.36
  -9  -2   1    3.62    0.34
  -9  -2   1    3.21    0.33
   8   2  -1    0.13    0.11
  -8  -2   1    0.02    0.12
  -8  -2   1    0.08    0.10
  -8  -2   1    0.11    0.13
  -8  -2   1    0.29    0.17
   7   2  -1    8.77    0.40
   7   2  -1    9.56    0.46
  -7  -2   1    8.68    0.45
  -7  -2   1    9.01    0.39
  -7  -2   1    9.18    0.44
   6   2  -1    0.99    0.08
   6   2  -1    1.16    0.16
  -6  -2   1    1.16    0.16
  -6  -2   1    1.33    0.17
  -6  -2   1    1.11    0.14
  -6  -2   1    0.89    0.13
  -6  -2   1    0.87    0.13
   5   2  -1   96.81    2.98
   5   2  -1   83.03    2.91
  -5  -2   1   96.59    3.00
  -5  -2   1   96.83    2.96
  -5  -2   1   89.36    2.97
  -5  -2   1   94.35    2.94
  -5  -2   1   98.32    2.94
   4   2  -1    3.08    0.18
   4   2  -1    3.23    0.20
  -4  -2   1    2.99    0.17
  -4  -2   1    3.05    0.19
  -4  -2   1    2.80    0.19
  -4  -2   1    3.11    0.18
   3   2  -1    0.15    0.06
   3   2  -1    0.15    0.05
  -3  -2   1    0.09    0.05
  -3  -2   1    0.13    0.07
  -3  -2   1    0.10    0.05
   2   2  -1    0.05    0.03
   2   2  -1    0.04    0.04
  -2  -2   1    0.05    0.03
  -2  -2   1    0.09    0.05
   1   2  -1   30.49    0.98
   1   2  -1   32.52    1.01
  -1  -2   1   30.28    1.01
   0  -2   1   50.64    1.59
  -1   2  -1  173.18    5.17
  -1   2  -1  169.44    5.14
   1  -2   1  161.96    5.14
  -2   2  -1    0.94    0.08
   2  -2   1    0.96    0.11
   2  -2   1    0.82    0.11
   2  -2   1    0.95    0.08
  -3   2  -1   35.76    1.17
  -3   2  -1   34.50    1.16
   3  -2   1   34.25    1.17
   3  -2   1   36.15    1.16
   3  -2   1   35.97    1.22
  -4   2  -1    1.48    0.15
  -4   2  -1    1.16    0.16
  -4   2  -1    1.92    0.20
   4  -2   1    1.91    0.20
   4  -2   1    1.53    0.21
  -5   2  -1    0.03    0.08
  -5   2  -1   -0.05    0.07
  -5   2  -1    0.08    0.06
   5  -2   1    0.02    0.06
  -6   2  -1    0.62    0.13
  -6   2  -1    0.79    0.10
  -6   2  -1    0.69    0.13
   6  -2   1    0.55    0.11
  -7   2  -1    9.23    0.47
  -7   2  -1    9.52    0.49
   7  -2   1    8.53    0.46
   7  -2   1    9.42    0.54
  -8   2  -1   16.73    0.73
  -8   2  -1   15.78    0.73
   8  -2   1   16.27    0.72
   8  -2   1   15.43    0.77
  -9   2  -1    0.17    0.19
  -9   2  -1    0.12    0.20
   9  -2   1    0.21    0.16
 -10   2  -1    0.09    0.23
 -10   2  -1    0.46    0.26
  10  -2   1    0.04    0.19
  10  -2   1   -0.11    0.30
 -11   2  -1   -0.14    0.26
  11  -2   1   -0.46    0.39
  11  -2   1    0.24    0.26
  12  -2   1    0.26    0.32
  13   1  -1    3.23    0.44
 -13  -1   1    4.10    0.50
  12   1  -1   -0.09    0.27
 -12  -1   1   -0.05    0.30
 -12  -1   1    0.53    0.32
  11   1  -1    1.95    0.28
 -11  -1   1    2.56    0.38
 -11  -1   1    2.93    0.43
  10   1  -1    2.51    0.35
 -10  -1   1    3.60    0.44
 -10  -1   1    3.16    0.37
 -10  -1   1    3.07    0.37
  -9  -1   1    0.61    0.18
  -9  -1   1    0.66    0.19
  -9  -1   1    0.66    0.18
   8   1  -1    3.08    0.27
   8   1  -1    3.26    0.29
  -8  -1   1    3.45    0.30
  -8  -1   1    3.56    0.24
  -8  -1   1    3.48    0.32
   7   1  -1    2.24    0.23
  -7  -1   1    2.20    0.19
  -7  -1   1    2.06    0.23
  -7  -1   1    2.07    0.21
  -7  -1   1    2.55    0.25
  -7  -1   1    2.04    0.19
   6   1  -1   38.60    1.33
  -6  -1   1   37.30    1.26
  -6  -1   1   36.70    1.28
  -6  -1   1   37.72    1.32
  -6  -1   1   39.30    1.34
  -6  -1   1   38.95    1.26
   5   1  -1   23.81    0.86
  -5  -1   1   22.88    0.79
  -5  -1   1   22.40    0.82
  -5  -1   1   23.20    0.85
  -5  -1   1   23.05    0.79
   4   1  -1   18.32    0.68
   4   1  -1   18.91    0.66
  -4  -1   1   19.59    0.66
  -4  -1   1   18.89    0.67
  -4  -1   1   18.88    0.67
  -4  -1   1   17.85    0.68
   3   1  -1   10.44    0.40
   3   1  -1   10.54    0.40
  -3  -1   1   10.57    0.40
  -3  -1   1   11.12    0.40
  -3  -1   1    9.64    0.40
   2   1  -1  246.97    7.65
   2   1  -1  244.22    7.65
  -2  -1   1  243.95    7.49
  -2  -1   1  244.39    7.65
  -2  -1   1  247.64    7.63
   1   1  -1   60.28    1.95
  -1  -1   1   65.02    1.97
  -1  -1   1   64.58    1.95
  -1   1  -1   11.39    0.38
  -1   1  -1   11.68    0.39
   1  -1   1   11.75    0.38
   1  -1   1   11.66    0.39
  -2   1  -1    3.74    0.17
  -2   1  -1    3.59    0.18
   2  -1   1    3.47    0.19
   2  -1   1    3.54    0.16
   2  -1   1    3.64    0.16
  -3   1  -1   40.65    1.30
  -3   1  -1   41.54    1.32
  -3   1  -1   40.24    1.34
   3  -1   1   37.31    1.34
   3  -1   1   42.27    1.32
   3  -1   1   41.72    1.30
  -4   1  -1    0.30    0.08
  -4   1  -1    0.16    0.06
  -4   1  -1    0.18    0.04
  -4   1  -1    0.19    0.04
   4  -1   1    0.11    0.09
   4  -1   1    0.21    0.07
   4  -1   1    0.27    0.10
  -5   1  -1  156.91    5.00
  -5   1  -1  159.30    5.01
  -5   1  -1  161.99    4.91
  -5   1  -1  160.68    4.98
   5  -1   1  163.99    5.00
   5  -1   1  153.07    4.96
   5  -1   1  167.03    5.04
  -6   1  -1    0.80    0.14
  -6   1  -1    0.47    0.11
  -6   1  -1    0.49    0.08
   6  -1   1    0.62    0.13
   6  -1   1    0.62    0.15
  -7   1  -1    0.42    0.14
  -7   1  -1    0.39    0.09
  -7   1  -1    0.61    0.14
   7  -1   1    0.40    0.11
  -8   1  -1    3.24    0.30
  -8   1  -1    3.31    0.32
   8  -1   1    2.76    0.28
   8  -1   1    3.68    0.37
  -9   1  -1   -0.29    0.16
  -9   1  -1    0.13    0.18
   9  -1   1   -0.21    0.21
 -10   1  -1    0.00    0.20
 -10   1  -1   -0.37    0.21
  10  -1   1    0.19    0.18
 -11   1  -1    2.13    0.36
  11  -1   1    1.49    0.36
  11  -1   1    1.62    0.27
 -12   1  -1   -0.08    0.30
  12  -1   1   -0.05    0.28
  12   0  -1    4.02    0.47
 -12   0   1    3.24    0.44
  11   0  -1    0.22    0.22
 -11   0   1    0.17    0.26
  10   0  -1    1.53    0.25
 -10   0   1    1.98    0.35
 -10   0   1    2.16    0.35
   9   0  -1    5.95    0.44
  -9   0   1    6.72    0.48
  -9   0   1    6.32    0.35
  -9   0   1    6.91    0.46
  -9   0   1    6.83    0.39
   8   0  -1    8.45    0.47
   8   0  -1    8.32    0.45
  -8   0   1    8.70    0.42
  -8   0   1    8.82    0.50
  -8   0   1    9.24    0.40
  -8   0   1    8.56    0.49
   7   0  -1    1.45    0.21
   7   0  -1    1.49    0.20
  -7   0   1    1.37    0.18
  -7   0   1    1.74    0.24
  -7   0   1    1.21    0.17
  -7   0   1    1.66    0.19
   6   0  -1   66.98    2.31
   6   0  -1   74.60    2.37
  -6   0   1   71.43    2.29
  -6   0   1   74.62    2.38
  -6   0   1   72.52    2.36
  -6   0   1   72.64    2.30
   5   0  -1    0.80    0.13
   5   0  -1    0.76    0.17
   5   0  -1    0.82    0.11
  -5   0   1    0.77    0.13
  -5   0   1    0.63    0.10
  -5   0   1    0.89    0.13
  -5   0   1    0.84    0.13
   4   0  -1    0.27    0.13
   4   0  -1    0.27    0.06
   4   0  -1    0.17    0.06
   4   0  -1    0.23    0.07
  -4   0   1    0.33    0.07
  -4   0   1    0.31    0.07
  -4   0   1    0.26    0.08
  -4   0   1    0.24    0.06
   3   0  -1    0.13    0.03
   3   0  -1    0.20    0.06
   3   0  -1    0.11    0.05
   3   0  -1    0.07    0.09
   3   0  -1    0.16    0.05
  -3   0   1    0.15    0.05
  -3   0   1    0.22    0.06
  -3   0   1    0.23    0.07
  -3   0   1    0.15    0.05
   2   0  -1    0.78    0.10
  -2   0   1    0.77    0.09
  -2   0   1    0.82    0.07
  -2   0   1    0.80    0.07
  -2   0   1    0.85    0.08
   1   0  -1  426.07   13.58
   1   0  -1  456.26   13.59
  -1   0   1  421.65   13.56
  -1   0   1  455.13   13.55
  -1   0   1  453.07   13.54
  -1   0   1  444.24   13.60
  -2   0  -1    7.37    0.27
   2   0   1    6.98    0.29
   2   0   1    7.42    0.24
   2   0   1    7.20    0.27
  -3   0  -1   13.48    0.45
  -3   0  -1   13.21    0.50
  -3   0  -1   12.37    0.47
   3   0   1   13.33    0.48
   3   0   1   12.95    0.50
   3   0   1   13.55    0.44
  -4   0  -1   96.11    3.29
  -4   0  -1  107.02    3.27
  -4   0  -1  106.93    3.32
   4   0   1  109.09    3.25
   4   0   1  107.14    3.30
   4   0   1  106.62    3.33
  -5   0  -1   77.26    2.55
  -5   0  -1   80.34    2.50
   5   0   1   79.15    2.49
   5   0   1   80.84    2.58
   5   0   1   80.09    2.55
  -6   0  -1    0.46    0.10
  -6   0  -1    0.44    0.11
  -6   0  -1    0.45    0.10
  -6   0  -1    0.27    0.09
   6   0   1    0.54    0.14
   6   0   1    0.82    0.16
   6   0   1    0.41    0.09
  -7   0  -1    5.62    0.29
  -7   0  -1    5.77    0.34
  -7   0  -1    5.62    0.35
  -7   0  -1    5.61    0.33
   7   0   1    5.66    0.33
   7   0   1    4.99    0.37
  -8   0  -1    0.55    0.17
  -8   0  -1    0.41    0.15
  -8   0  -1    0.42    0.14
  -8   0  -1    0.63    0.13
   8   0   1    0.44    0.14
  -9   0  -1    2.74    0.25
  -9   0  -1    3.07    0.32
  -9   0  -1    2.73    0.34
   9   0   1    3.44    0.37
   9   0   1    3.26    0.32
 -10   0  -1    0.28    0.22
 -10   0  -1    0.23    0.22
 -10   0  -1    0.33    0.17
  10   0   1    0.16    0.24
  10   0   1    0.45    0.20
 -11   0  -1    1.28    0.30
  11   0   1    1.14    0.25
 -12   0  -1    0.13    0.29
  12   0   1    0.27    0.35
  12   0   1    0.30    0.25
 -13   0  -1    0.59    0.36
  13   0   1    0.31    0.35
  12  -1  -1    1.98    0.36
 -12   1   1    0.85    0.35
  11  -1  -1    0.21    0.25
 -11   1   1    0.57    0.28
  10  -1  -1    4.74    0.48
  10  -1  -1    5.99    0.45
 -10   1   1    5.50    0.48
 -10   1   1    5.46    0.55
   9  -1  -1    0.46    0.18
  -9   1   1    0.43    0.23
  -9   1   1    0.64    0.22
   8  -1  -1   22.16    0.91
   8  -1  -1   22.98    0.94
  -8   1   1   22.51    0.95
  -8   1   1   22.32    0.95
  -8   1   1   23.46    0.82
  -8   1   1   23.94    0.85
   7  -1  -1   16.09    0.71
   7  -1  -1   18.71    0.75
  -7   1   1   17.83    0.65
  -7   1   1   17.66    0.76
  -7   1   1   18.04    0.75
  -7   1   1   18.35    0.68
   6  -1  -1    4.00    0.27
   6  -1  -1    4.05    0.29
  -6   1   1    4.14    0.26
  -6   1   1    3.94    0.22
  -6   1   1    3.86    0.28
   5  -1  -1    0.12    0.09
   5  -1  -1    0.10    0.07
  -5   1   1    0.06    0.08
  -5   1   1    0.21    0.10
  -5   1   1    0.20    0.06
  -5   1   1    0.11    0.09
   4  -1  -1  183.63    5.61
   4  -1  -1  179.43    5.59
  -4   1   1  181.05    5.58
  -4   1   1  183.48    5.54
  -4   1   1  178.72    5.61
  -4   1   1  180.18    5.61
   3  -1  -1   18.10    0.67
   3  -1  -1   20.42    0.64
   3  -1  -1   19.87    0.69
   3  -1  -1   18.53    0.63
   3  -1  -1   19.43    0.70
  -3   1   1   19.92    0.68
  -3   1   1   19.42    0.70
  -3   1   1   21.24    0.65
  -3   1   1   19.16    0.69
   2  -1  -1    0.21    0.05
   2  -1  -1    0.22    0.08
   2  -1  -1    0.20    0.04
   2  -1  -1    0.17    0.03
  -2   1   1    0.18    0.05
  -2   1   1    0.29    0.07
  -2   1   1    0.17    0.04
  -2   1   1    0.19    0.05
  -2   1   1    0.22    0.04
   1  -1  -1  199.96    5.93
   1  -1  -1  182.54    5.93
   1  -1  -1  192.92    5.90
  -1   1   1  183.41    5.93
  -1   1   1  196.86    5.89
  -1   1   1  202.64    5.92
  -1   1   1  192.79    5.94
  -2  -1  -1   46.57    1.39
  -2  -1  -1   43.75    1.41
   2   1   1   43.76    1.41
   2   1   1   48.07    1.40
   2   1   1   41.99    1.43
  -3  -1  -1    1.55    0.14
  -3  -1  -1    1.72    0.08
  -3  -1  -1    1.74    0.09
  -3  -1  -1    1.71    0.12
   3   1   1    1.66    0.11
   3   1   1    1.47    0.13
  -4  -1  -1    2.60    0.17
  -4  -1  -1    2.74    0.19
  -4  -1  -1    2.71    0.14
  -4  -1  -1    2.90    0.11
   4   1   1    2.71    0.19
   4   1   1    2.97    0.17
  -5  -1  -1    2.18    0.18
  -5  -1  -1    2.14    0.16
  -5  -1  -1    2.37    0.20
  -5  -1  -1    2.32    0.16
   5   1   1    2.44    0.20
   5   1   1    2.23    0.17
  -6  -1  -1    3.43    0.25
  -6  -1  -1    3.69    0.22
  -6  -1  -1    3.64    0.24
   6   1   1    3.48    0.27
   6   1   1    3.44    0.24
  -7  -1  -1   24.33    0.87
  -7  -1  -1   24.02    0.88
  -7  -1  -1   24.24    0.91
  -7  -1  -1   24.91    0.93
   7   1   1   22.77    0.92
   7   1   1   24.24    0.91
  -8  -1  -1    8.06    0.41
  -8  -1  -1    8.35    0.46
  -8  -1  -1    8.33    0.44
  -8  -1  -1    9.00    0.44
   8   1   1    8.63    0.45
  -9  -1  -1    5.06    0.38
  -9  -1  -1    5.45    0.37
  -9  -1  -1    5.38    0.42
   9   1   1    5.30    0.41
   9   1   1    4.99    0.40
 -10  -1  -1    1.17    0.19
 -10  -1  -1    1.05    0.22
 -10  -1  -1    0.74    0.22
 -10  -1  -1    0.63    0.20
  10   1   1    0.59    0.19
  10   1   1    0.84    0.24
 -11  -1  -1   -0.22    0.21
 -11  -1  -1    0.21    0.24
 -11  -1  -1    0.13    0.23
  11   1   1   -0.01    0.24
  11   1   1    0.07    0.18
 -12  -1  -1    0.42    0.27
 -12  -1  -1    0.26    0.26
 -13  -1  -1    1.00    0.38
  13   1   1    0.66    0.34
  12  -2  -1    0.49    0.36
 -12   2   1   -0.85    0.37
 -11   2   1    0.54    0.31
  10  -2  -1    0.09    0.31
  10  -2  -1    0.23    0.23
 -10   2   1    0.42    0.30
 -10   2   1    0.28    0.26
   9  -2  -1    6.93    0.46
   9  -2  -1    6.06    0.49
  -9   2   1    5.83    0.48
  -9   2   1    6.20    0.51
   8  -2  -1   -0.10    0.14
  -8   2   1    0.14    0.17
  -8   2   1   -0.04    0.16
   7  -2  -1   18.74    0.83
   7  -2  -1   20.01    0.82
  -7   2   1   20.51    0.77
  -7   2   1   20.52    0.85
  -7   2   1   20.14    0.83
   6  -2  -1   35.42    1.23
   6  -2  -1   31.80    1.22
  -6   2   1   34.38    1.23
  -6   2   1   34.62    1.25
  -6   2   1   34.59    1.18
   5  -2  -1   31.12    1.07
   5  -2  -1   27.97    1.07
  -5   2   1   31.20    1.08
  -5   2   1   30.77    1.05
  -5   2   1   30.59    1.10
   4  -2  -1   38.25    1.32
   4  -2  -1   39.83    1.32
  -4   2   1   38.31    1.34
  -4   2   1   39.96    1.27
  -4   2   1   39.64    1.31
   3  -2  -1   73.09    2.28
   3  -2  -1   69.80    2.25
   3  -2  -1   70.96    2.29
  -3   2   1   76.51    2.26
  -3   2   1   73.82    2.29
  -3   2   1   73.56    2.31
  -3   2   1   66.28    2.28
   2  -2  -1   71.38    2.21
   2  -2  -1   66.66    2.20
   2  -2  -1   64.27    2.23
  -2   2   1   74.00    2.23
  -2   2   1   71.69    2.24
  -2   2   1   74.32    2.22
  -2   2   1   72.30    2.21
   1  -2  -1   71.58    2.23
   1  -2  -1   68.38    2.24
  -1   2   1   72.48    2.24
  -1   2   1   72.93    2.24
  -1   2   1   69.81    2.21
  -1   2   1   73.54    2.24
   0  -2  -1   71.83    2.38
   0  -2  -1   73.37    2.33
   0  -2  -1   73.75    2.37
   0  -2  -1   73.95    2.38
   0   2   1   78.99    2.38
   0   2   1   84.48    2.39
   0   2   1   78.36    2.38
   0   2   1   78.03    2.37
  -1  -2  -1    0.98    0.05
  -1  -2  -1    0.94    0.08
  -1  -2  -1    1.04    0.08
   1   2   1    0.99    0.06
   1   2   1    1.04    0.08
  -2  -2  -1  144.26    4.40
  -2  -2  -1  140.71    4.42
  -2  -2  -1  145.86    4.39
  -2  -2  -1  145.78    4.37
   2   2   1  145.68    4.39
   2   2   1  136.47    4.41
  -3  -2  -1   16.96    0.55
  -3  -2  -1   15.92    0.56
  -3  -2  -1   16.67    0.60
   3   2   1   14.75    0.58
   3   2   1   16.30    0.56
   3   2   1   16.38    0.56
  -4  -2  -1    1.46    0.15
  -4  -2  -1    1.58    0.12
  -4  -2  -1    1.78    0.10
   4   2   1    1.79    0.16
   4   2   1    1.62    0.13
  -5  -2  -1    6.98    0.35
  -5  -2  -1    6.58    0.32
  -5  -2  -1    6.93    0.28
   5   2   1    6.75    0.32
   5   2   1    6.59    0.34
  -6  -2  -1   16.30    0.57
  -6  -2  -1   14.73    0.60
  -6  -2  -1   15.52    0.63
  -6  -2  -1   15.70    0.62
   6   2   1   14.40    0.62
   6   2   1   15.90    0.62
  -7  -2  -1   -0.04    0.09
  -7  -2  -1    0.09    0.10
   7   2   1   -0.01    0.12
   7   2   1   -0.03    0.07
  -8  -2  -1   14.97    0.66
  -8  -2  -1   14.64    0.61
  -8  -2  -1   14.71    0.63
  -8  -2  -1   15.20    0.65
   8   2   1   14.39    0.66
   8   2   1   15.03    0.65
  -9  -2  -1    1.82    0.23
  -9  -2  -1    1.23    0.21
  -9  -2  -1    1.65    0.25
  -9  -2  -1    1.54    0.22
   9   2   1    1.55    0.24
   9   2   1    1.56    0.22
 -10  -2  -1    3.66    0.41
 -10  -2  -1    3.71    0.35
 -10  -2  -1    4.29    0.36
 -10  -2  -1    4.20    0.35
  10   2   1    3.96    0.40
  10   2   1    4.22    0.37
 -11  -2  -1   -0.07    0.20
 -11  -2  -1    0.26    0.24
 -11  -2  -1    0.15    0.18
 -11  -2  -1    0.02    0.22
  11   2   1    0.00    0.23
  11   2   1   -0.03    0.17
 -12  -2  -1   -0.14    0.25
 -12  -2  -1    0.27    0.27
  12   2   1    0.32    0.21
 -13  -2  -1    0.53    0.35
  13   2   1    0.16    0.27
  11  -3  -1    0.20    0.30
 -11   3   1   -0.29    0.33
  10  -3  -1    0.29    0.23
 -10   3   1    0.41    0.28
   9  -3  -1    4.01    0.41
   9  -3  -1    3.32    0.41
  -9   3   1    3.87    0.52
  -9   3   1    3.94    0.45
   8  -3  -1    0.15    0.15
   8  -3  -1    0.16    0.22
  -8   3   1   -0.15    0.18
  -8   3   1    0.49    0.20
   7  -3  -1    9.67    0.57
   7  -3  -1   10.71    0.54
  -7   3   1    9.88    0.54
  -7   3   1    9.66    0.56
   6  -3  -1    0.02    0.09
  -6   3   1    0.00    0.11
  -6   3   1    0.05    0.11
  -6   3   1   -0.10    0.12
   5  -3  -1    0.12    0.11
   5  -3  -1   -0.06    0.07
  -5   3   1    0.05    0.09
  -5   3   1    0.00    0.12
  -5   3   1   -0.04    0.08
  -5   3   1    0.07    0.10
   4  -3  -1   21.01    0.75
   4  -3  -1   19.81    0.78
  -4   3   1   20.74    0.76
  -4   3   1   20.34    0.78
  -4   3   1   20.54    0.74
   3  -3  -1   40.76    1.33
  -3   3   1   40.07    1.35
  -3   3   1   40.23    1.34
  -3   3   1   40.76    1.37
  -3   3   1   39.82    1.33
   2  -3  -1    3.26    0.19
   2  -3  -1    3.22    0.17
  -2   3   1    3.64    0.20
  -2   3   1    3.24    0.20
  -2   3   1    3.34    0.19
  -2   3   1    3.44    0.17
   1  -3  -1    6.41    0.27
   1  -3  -1    5.48    0.27
   1  -3  -1    6.34    0.23
  -1   3   1    6.13    0.24
  -1   3   1    6.56    0.28
  -1   3   1    6.09    0.27
  -1   3   1    6.47    0.28
   0  -3  -1  286.42    8.83
   0  -3  -1  291.51    8.75
   0  -3  -1  275.62    8.78
   0  -3  -1  280.50    8.85
   0   3   1  297.97    8.81
   0   3   1  291.97    8.78
   0   3   1  288.16    8.77
   0   3   1  285.62    8.74
  -1  -3  -1    3.08    0.17
  -1  -3  -1    2.97    0.18
   1   3   1    3.52    0.18
   1   3   1    3.08    0.16
   1   3   1    2.94    0.18
  -2  -3  -1  614.11   19.77
  -2  -3  -1  654.69   19.94
  -2  -3  -1  672.21   19.82
   2   3   1  647.70   19.91
  -3  -3  -1  267.40    8.77
  -3  -3  -1  282.97    8.74
  -3  -3  -1  285.48    8.71
  -3  -3  -1  293.60    8.70
   3   3   1  291.82    8.78
   3   3   1  288.68    8.75
  -4  -3  -1  149.29    4.76
  -4  -3  -1  155.52    4.75
  -4  -3  -1  159.16    4.81
   4   3   1  157.13    4.76
   4   3   1  144.68    4.79
   4   3   1  159.42    4.75
  -5  -3  -1    2.29    0.21
  -5  -3  -1    2.12    0.18
  -5  -3  -1    2.17    0.17
   5   3   1    2.09    0.16
   5   3   1    2.67    0.20
   5   3   1    2.41    0.15
  -6  -3  -1    5.87    0.34
  -6  -3  -1    6.02    0.32
   6   3   1    5.38    0.30
   6   3   1    6.02    0.26
   6   3   1    5.78    0.33
  -7  -3  -1   35.25    1.28
  -7  -3  -1   36.06    1.30
   7   3   1   36.48    1.28
   7   3   1   39.28    1.19
   7   3   1   33.76    1.27
  -8  -3  -1    1.25    0.18
  -8  -3  -1    1.02    0.19
  -8  -3  -1    1.13    0.20
   8   3   1    1.06    0.17
  -9  -3  -1   15.62    0.72
  -9  -3  -1   15.93    0.65
  -9  -3  -1   15.57    0.70
  -9  -3  -1   15.09    0.70
   9   3   1   16.33    0.70
   9   3   1   14.76    0.69
 -10  -3  -1    0.19    0.19
 -10  -3  -1   -0.13    0.19
 -10  -3  -1   -0.14    0.18
 -10  -3  -1   -0.15    0.16
  10   3   1   -0.01    0.14
  10   3   1   -0.08    0.19
 -11  -3  -1    1.95    0.30
 -11  -3  -1    2.22    0.29
 -11  -3  -1    1.98    0.29
 -11  -3  -1    2.89    0.32
  11   3   1    2.31    0.32
  11   3   1    1.91    0.26
 -12  -3  -1    0.15    0.23
 -12  -3  -1    0.19    0.26
 -12  -3  -1   -0.24    0.26
  12   3   1   -0.22    0.20
  12   3   1   -0.14    0.25
 -13  -3  -1   -0.54    0.32
 -13  -3  -1   -0.17    0.32
  13   3   1    0.03    0.26
 -14  -3  -1    3.03    0.50
  11  -4  -1   -0.37    0.34
 -11   4   1    0.42    0.35
  10  -4  -1    0.34    0.29
  10  -4  -1    0.46    0.37
 -10   4   1    0.62    0.30
   9  -4  -1    1.27    0.36
   9  -4  -1    1.18    0.26
  -9   4   1    0.58    0.24
  -9   4   1    0.90    0.31
  -8   4   1   -0.12    0.22
  -8   4   1    0.14    0.23
   7  -4  -1    0.63    0.17
   7  -4  -1    0.45    0.22
  -7   4   1    0.53    0.17
  -7   4   1    0.79    0.19
   6  -4  -1    2.04    0.22
   6  -4  -1    1.94    0.28
  -6   4   1    1.49    0.23
  -6   4   1    1.45    0.22
  -6   4   1    1.58    0.22
   5  -4  -1   14.06    0.64
   5  -4  -1   13.86    0.58
  -5   4   1   13.71    0.59
  -5   4   1   14.28    0.63
  -5   4   1   13.09    0.58
  -5   4   1   13.56    0.57
   4  -4  -1    0.84    0.13
  -4   4   1    1.36    0.21
  -4   4   1    1.35    0.20
  -4   4   1    0.92    0.15
  -4   4   1    0.85    0.12
   3  -4  -1   19.43    0.68
  -3   4   1   18.21    0.68
  -3   4   1   18.90    0.71
  -3   4   1   18.89    0.73
  -3   4   1   19.09    0.72
   2  -4  -1    0.03    0.05
   2  -4  -1    0.08    0.07
  -2   4   1    0.06    0.07
  -2   4   1    0.09    0.07
  -2   4   1   -0.25    0.10
  -2   4   1    0.00    0.09
   1  -4  -1   23.55    0.86
   1  -4  -1   26.29    0.82
   1  -4  -1   25.22    0.89
  -1   4   1   25.22    0.89
  -1   4   1   26.06    0.88
  -1   4   1   25.99    0.89
  -1   4   1   25.36    0.82
   0  -4  -1   21.99    0.80
   0  -4  -1   21.08    0.76
   0  -4  -1   22.68    0.70
   0   4   1   24.32    0.78
   0   4   1   22.11    0.80
   0   4   1   22.59    0.79
  -1  -4  -1  304.21    9.71
   1   4   1  328.33    9.78
   1   4   1  318.72    9.71
  -2  -4  -1   53.24    1.84
  -2  -4  -1   55.96    1.75
   2   4   1   57.93    1.84
   2   4   1   60.42    1.76
  -3  -4  -1    7.00    0.33
  -3  -4  -1    6.76    0.31
  -3  -4  -1    6.15    0.26
  -3  -4  -1    6.64    0.29
   3   4   1    7.25    0.27
   3   4   1    6.93    0.31
  -4  -4  -1  168.11    5.14
  -4  -4  -1  145.65    5.15
  -4  -4  -1  171.03    5.20
  -4  -4  -1  174.53    5.22
  -4  -4  -1  166.52    5.12
   4   4   1  172.97    5.17
   4   4   1  170.33    5.14
  -5  -4  -1   34.86    1.24
  -5  -4  -1   35.00    1.19
   5   4   1   35.09    1.18
   5   4   1   35.88    1.19
  -6  -4  -1   11.57    0.48
  -6  -4  -1   10.98    0.51
  -6  -4  -1   11.32    0.52
   6   4   1   11.41    0.45
   6   4   1   10.90    0.47
   6   4   1   10.89    0.49
  -7  -4  -1    1.79    0.24
  -7  -4  -1    1.34    0.18
  -7  -4  -1    1.52    0.20
   7   4   1    1.31    0.16
   7   4   1    1.06    0.15
   7   4   1    1.45    0.20
  -8  -4  -1    4.80    0.33
  -8  -4  -1    4.01    0.32
  -8  -4  -1    4.11    0.35
   8   4   1    4.37    0.31
   8   4   1    4.87    0.26
  -9  -4  -1    1.14    0.23
  -9  -4  -1    1.02    0.21
  -9  -4  -1    0.99    0.20
   9   4   1    0.84    0.17
   9   4   1    0.97    0.18
 -10  -4  -1   18.82    0.87
 -10  -4  -1   20.45    0.88
 -10  -4  -1   20.00    0.87
  10   4   1   19.36    0.83
 -11  -4  -1   17.46    0.86
 -11  -4  -1   19.87    0.90
 -11  -4  -1   19.39    0.85
  11   4   1   18.92    0.87
  11   4   1   17.93    0.83
 -12  -4  -1    7.32    0.60
 -12  -4  -1    6.96    0.53
  12   4   1    7.18    0.54
 -13  -4  -1    0.32    0.26
 -13  -4  -1    0.22    0.32
  13   4   1    0.58    0.28
  14   4   1    4.96    0.66
  10  -5  -1    0.78    0.34
 -10   5   1    0.46    0.35
   9  -5  -1    1.19    0.28
   9  -5  -1    0.83    0.38
  -9   5   1    1.49    0.36
   8  -5  -1    1.92    0.40
   8  -5  -1    2.89    0.38
  -8   5   1    1.59    0.33
  -8   5   1    1.66    0.32
   7  -5  -1    9.62    0.52
   7  -5  -1    9.88    0.62
  -7   5   1    8.67    0.49
  -7   5   1    9.24    0.57
  -7   5   1    8.92    0.55
   6  -5  -1    7.54    0.42
  -6   5   1    7.40    0.44
  -6   5   1    7.15    0.43
  -6   5   1    7.16    0.46
   5  -5  -1    0.46    0.20
   5  -5  -1    0.58    0.13
  -5   5   1    0.36    0.16
  -5   5   1    0.52    0.17
  -5   5   1    0.71    0.15
   4  -5  -1    1.13    0.22
   4  -5  -1    1.12    0.15
   4  -5  -1    0.75    0.16
  -4   5   1    0.97    0.17
  -4   5   1    0.80    0.13
  -4   5   1    0.83    0.16
   3  -5  -1    0.46    0.13
   3  -5  -1    0.31    0.07
  -3   5   1    0.33    0.11
  -3   5   1    0.27    0.08
  -3   5   1    0.19    0.10
  -3   5   1    0.19    0.13
   2  -5  -1   51.83    1.66
   2  -5  -1   52.08    1.61
  -2   5   1   50.20    1.69
  -2   5   1   49.70    1.69
  -2   5   1   48.78    1.61
  -2   5   1   50.16    1.69
   1  -5  -1   10.64    0.36
   1  -5  -1    9.47    0.38
   1  -5  -1    9.51    0.40
  -1   5   1   10.54    0.43
  -1   5   1    8.43    0.46
  -1   5   1   10.22    0.36
   0  -5  -1  136.81    4.27
   0  -5  -1  134.92    4.21
   0  -5  -1  123.50    4.21
   0   5   1  137.04    4.23
   0   5   1  148.18    4.23
   0   5   1  136.10    4.27
  -1  -5  -1   13.14    0.54
  -1  -5  -1   13.07    0.50
   1   5   1   13.04    0.54
   1   5   1   13.33    0.51
  -2  -5  -1  100.89    3.25
  -2  -5  -1  101.39    3.13
  -2  -5  -1  105.32    3.23
   2   5   1  101.89    3.13
   2   5   1  103.44    3.26
  -3  -5  -1   84.45    2.69
  -3  -5  -1   87.31    2.78
  -3  -5  -1   85.75    2.78
   3   5   1   88.87    2.69
   3   5   1   88.28    2.78
  -4  -5  -1   45.26    1.46
  -4  -5  -1   42.63    1.54
  -4  -5  -1   47.34    1.57
   4   5   1   45.35    1.46
   4   5   1   46.05    1.52
  -5  -5  -1   -0.03    0.06
  -5  -5  -1    0.00    0.10
  -5  -5  -1    0.10    0.09
  -5  -5  -1   -0.05    0.09
   5   5   1   -0.02    0.07
   5   5   1    0.03    0.06
  -6  -5  -1    7.13    0.35
  -6  -5  -1    7.25    0.40
  -6  -5  -1    6.97    0.31
  -6  -5  -1    7.16    0.41
   6   5   1    7.09    0.35
   6   5   1    7.14    0.34
  -7  -5  -1    0.09    0.09
  -7  -5  -1    0.21    0.12
  -7  -5  -1    0.10    0.11
   7   5   1    0.07    0.09
   7   5   1    0.08    0.09
  -8  -5  -1    0.03    0.10
  -8  -5  -1    0.10    0.15
  -8  -5  -1    0.04    0.13
   8   5   1   -0.01    0.10
   8   5   1    0.15    0.10
  -9  -5  -1    3.28    0.32
  -9  -5  -1    3.70    0.37
  -9  -5  -1    3.75    0.36
   9   5   1    3.69    0.27
   9   5   1    3.31    0.30
 -10  -5  -1    7.47    0.51
 -10  -5  -1    7.46    0.48
 -10  -5  -1    7.02    0.52
 -11  -5  -1   10.84    0.64
 -11  -5  -1   11.14    0.62
 -11  -5  -1    9.97    0.65
  11   5   1   10.25    0.60
 -12  -5  -1    0.00    0.28
 -12  -5  -1    0.19    0.26
  12   5   1   -0.19    0.21
 -13  -5  -1    0.27    0.30
 -13  -5  -1    0.71    0.36
  13   5   1    1.38    0.30
 -14  -5  -1    0.86    0.44
  14   5   1    1.39    0.37
 -10   6   1    2.05    0.44
   9  -6  -1    3.15    0.60
   9  -6  -1    3.04    0.57
  -9   6   1    4.20    0.52
   8  -6  -1    1.32    0.41
   8  -6  -1    2.04    0.30
   8  -6  -1    1.29    0.42
  -8   6   1    1.22    0.33
   7  -6  -1    0.13    0.27
   7  -6  -1   -0.16    0.17
  -7   6   1    0.01    0.21
  -7   6   1   -0.16    0.20
  -7   6   1   -0.09    0.23
   6  -6  -1    3.68    0.47
   6  -6  -1    3.75    0.32
   6  -6  -1    2.90    0.40
  -6   6   1    2.87    0.35
  -6   6   1    3.36    0.37
  -6   6   1    3.21    0.36
   5  -6  -1   13.00    0.57
   5  -6  -1   13.33    0.70
  -5   6   1   11.98    0.61
  -5   6   1   12.39    0.61
  -5   6   1   12.16    0.63
   4  -6  -1   14.89    0.58
   4  -6  -1   13.88    0.62
  -4   6   1   14.37    0.59
  -4   6   1   14.74    0.65
  -4   6   1   13.75    0.66
   3  -6  -1    7.87    0.34
   3  -6  -1    6.59    0.37
  -3   6   1    7.46    0.35
  -3   6   1    7.31    0.42
  -3   6   1    7.78    0.42
   2  -6  -1    2.98    0.17
   2  -6  -1    2.75    0.21
  -2   6   1    2.88    0.23
  -2   6   1    2.94    0.26
  -2   6   1    2.47    0.17
   1  -6  -1   49.09    1.60
   1  -6  -1   52.94    1.56
   1  -6  -1   45.40    1.61
  -1   6   1   49.71    1.67
  -1   6   1   48.92    1.56
  -1   6   1   52.01    1.70
   0  -6  -1   16.26    0.61
   0   6   1   17.11    0.62
   0   6   1   15.67    0.62
   0   6   1   16.47    0.68
  -1  -6  -1   13.40    0.56
   1   6   1   13.81    0.61
   1   6   1   14.17    0.55
  -2  -6  -1   41.87    1.43
   2   6   1   40.88    1.47
   2   6   1   42.51    1.43
  -3  -6  -1   41.95    1.46
   3   6   1   49.23    1.62
   3   6   1   49.21    1.47
  -4  -6  -1   12.72    0.55
  -4  -6  -1   12.23    0.46
   4   6   1   12.63    0.46
   4   6   1   12.66    0.55
  -5  -6  -1   20.50    0.82
  -5  -6  -1   20.19    0.72
  -5  -6  -1   20.05    0.80
   5   6   1   19.59    0.78
   5   6   1   20.21    0.71
  -6  -6  -1    5.22    0.29
  -6  -6  -1    5.41    0.36
  -6  -6  -1    5.23    0.35
   6   6   1    5.25    0.28
   6   6   1    5.30    0.32
  -7  -6  -1    4.78    0.37
  -7  -6  -1    4.78    0.30
  -7  -6  -1    4.67    0.36
   7   6   1    4.51    0.31
   7   6   1    4.67    0.29
  -8  -6  -1    2.97    0.27
  -8  -6  -1    3.07    0.33
  -8  -6  -1    2.93    0.33
   8   6   1    3.15    0.26
   8   6   1    3.30    0.26
  -9  -6  -1    1.01    0.24
  -9  -6  -1    0.85    0.17
  -9  -6  -1    0.91    0.22
   9   6   1    0.83    0.17
   9   6   1    0.95    0.17
 -10  -6  -1   12.58    0.67
 -10  -6  -1   11.86    0.68
 -10  -6  -1   12.61    0.64
  10   6   1   12.71    0.62
  10   6   1   11.50    0.55
 -11  -6  -1    1.14    0.30
 -11  -6  -1    1.24    0.27
 -11  -6  -1    2.08    0.34
  11   6   1    1.30    0.24
 -12  -6  -1    0.10    0.31
 -12  -6  -1    1.12    0.31
  12   6   1    0.65    0.25
 -13  -6  -1    1.02    0.35
 -13  -6  -1    1.06    0.41
  13   6   1    1.20    0.27
  14   6   1    5.40    0.62
   9  -7  -1   -0.13    0.35
  -9   7   1    0.08    0.32
   8  -7  -1    0.52    0.40
   8  -7  -1    0.42    0.45
   8  -7  -1    0.65    0.27
  -8   7   1    0.64    0.33
  -8   7   1    0.06    0.36
   7  -7  -1    1.14    0.31
   7  -7  -1    0.92    0.25
   7  -7  -1    1.23    0.43
  -7   7   1    0.61    0.29
  -7   7   1    0.75    0.29
   6  -7  -1    1.44    0.21
   6  -7  -1    2.00    0.39
   6  -7  -1    1.52    0.29
  -6   7   1    1.47    0.27
  -6   7   1    1.21    0.28
  -6   7   1    1.31    0.25
   5  -7  -1   14.06    0.60
   5  -7  -1   13.18    0.77
  -5   7   1   13.89    0.68
  -5   7   1   12.87    0.68
   4  -7  -1    0.25    0.14
   4  -7  -1    0.38    0.12
  -4   7   1    0.18    0.16
  -4   7   1    0.26    0.12
  -4   7   1    0.41    0.19
   3  -7  -1   16.33    0.60
   3  -7  -1   15.27    0.62
  -3   7   1   15.47    0.72
  -3   7   1   14.90    0.69
  -3   7   1   15.69    0.60
   2  -7  -1   -0.05    0.06
   2  -7  -1   -0.04    0.08
  -2   7   1   -0.08    0.08
  -2   7   1    0.25    0.13
  -2   7   1    0.05    0.11
   1  -7  -1   11.61    0.41
   1  -7  -1   11.03    0.47
   1  -7  -1   11.87    0.47
  -1   7   1   12.24    0.57
  -1   7   1   11.58    0.41
  -1   7   1   11.71    0.52
   0  -7  -1    0.04    0.09
   0   7   1    0.05    0.12
   0   7   1    0.18    0.09
   0   7   1    0.12    0.07
  -1  -7  -1    0.05    0.08
   1   7   1   -0.08    0.07
   1   7   1    0.02    0.10
   2   7   1    0.01    0.11
   2   7   1    0.20    0.09
  -3  -7  -1   -0.05    0.08
  -3  -7  -1    0.08    0.04
   3   7   1   -0.06    0.11
  -4  -7  -1    0.10    0.10
  -4  -7  -1    0.10    0.05
   4   7   1    0.12    0.05
   4   7   1    0.15    0.12
  -5  -7  -1   -0.04    0.09
  -5  -7  -1    0.02    0.06
  -5  -7  -1   -0.09    0.09
   5   7   1    0.00    0.10
   5   7   1    0.01    0.05
  -6  -7  -1    0.55    0.16
  -6  -7  -1    0.48    0.15
   6   7   1    0.51    0.10
   6   7   1    0.63    0.16
  -7  -7  -1   19.76    0.86
  -7  -7  -1   20.04    0.76
  -7  -7  -1   19.78    0.86
   7   7   1   20.20    0.76
   7   7   1   19.01    0.79
  -8  -7  -1   -0.11    0.10
  -8  -7  -1    0.08    0.18
  -8  -7  -1   -0.12    0.14
   8   7   1    0.15    0.10
   8   7   1    0.01    0.12
  -9  -7  -1   31.88    1.30
  -9  -7  -1   32.33    1.29
  -9  -7  -1   31.49    1.20
   9   7   1   32.30    1.20
   9   7   1   31.15    1.18
 -10  -7  -1   -0.37    0.17
 -10  -7  -1   -0.09    0.20
 -10  -7  -1   -0.18    0.21
  10   7   1    0.03    0.16
  10   7   1   -0.02    0.13
 -11  -7  -1    0.04    0.23
 -11  -7  -1    0.40    0.27
 -11  -7  -1    0.23    0.26
  11   7   1    0.16    0.19
  11   7   1    0.40    0.19
 -12  -7  -1   -0.32    0.30
 -12  -7  -1   -0.26    0.32
  12   7   1   -0.17    0.20
 -13  -7  -1    1.44    0.37
 -13  -7  -1    1.35    0.45
  14   7   1    0.57    0.33
   8  -8  -1   -0.29    0.56
   8  -8  -1   -0.08    0.30
  -8   8   1    0.73    0.43
  -8   8   1    0.55    0.33
   7  -8  -1    0.09    0.45
   7  -8  -1    0.47    0.34
   7  -8  -1   -0.08    0.24
  -7   8   1   -0.15    0.23
  -7   8   1   -0.09    0.31
  -7   8   1    0.15    0.34
   6  -8  -1    7.20    0.75
   6  -8  -1    7.20    0.48
  -6   8   1    6.48    0.54
  -6   8   1    6.78    0.57
   5  -8  -1    1.32    0.24
   5  -8  -1    1.44    0.21
   5  -8  -1    1.34    0.36
  -5   8   1    1.55    0.25
  -5   8   1    1.19    0.26
  -5   8   1    1.38    0.28
   4  -8  -1    0.75    0.18
   4  -8  -1    1.13    0.17
  -4   8   1    0.86    0.18
  -4   8   1    0.91    0.21
  -4   8   1    1.03    0.25
   3  -8  -1    0.07    0.09
   3  -8  -1    0.15    0.12
  -3   8   1    0.22    0.12
  -3   8   1    0.38    0.21
  -3   8   1    0.36    0.15
   2  -8  -1    0.58    0.10
   2  -8  -1    0.48    0.11
   2  -8  -1    0.50    0.13
  -2   8   1    0.47    0.14
  -2   8   1    0.79    0.11
  -2   8   1    0.40    0.19
   1  -8  -1    1.63    0.20
  -1   8   1    2.16    0.23
  -1   8   1    2.10    0.29
   0  -8  -1    0.99    0.15
   0   8   1    0.73    0.14
   0   8   1    0.71    0.21
  -1  -8  -1    6.87    0.39
   1   8   1    7.82    0.46
   1   8   1    7.92    0.38
   1   8   1    7.98    0.38
  -2  -8  -1    0.44    0.12
   2   8   1    0.53    0.17
   2   8   1    0.36    0.12
  -3  -8  -1   43.75    1.52
   3   8   1   43.01    1.51
   3   8   1   41.86    1.54
  -4  -8  -1    0.46    0.08
   4   8   1    0.47    0.07
   4   8   1    0.52    0.15
  -5  -8  -1    0.14    0.12
  -5  -8  -1    0.23    0.08
   5   8   1   -0.03    0.14
   5   8   1    0.23    0.07
  -6  -8  -1    0.09    0.13
  -6  -8  -1    0.17    0.14
   6   8   1    0.33    0.09
   6   8   1    0.15    0.15
  -7  -8  -1    2.34    0.32
  -7  -8  -1    2.39    0.31
  -7  -8  -1    2.36    0.23
   7   8   1    2.49    0.21
   7   8   1    2.57    0.29
  -8  -8  -1    3.78    0.41
  -8  -8  -1    3.46    0.30
  -8  -8  -1    3.13    0.40
   8   8   1    3.51    0.28
   8   8   1    3.04    0.33
  -9  -8  -1   16.77    0.84
  -9  -8  -1   15.87    0.83
  -9  -8  -1   17.21    0.75
   9   8   1   16.07    0.74
   9   8   1   16.88    0.73
 -10  -8  -1    5.43    0.53
 -10  -8  -1    5.81    0.54
 -10  -8  -1    6.57    0.47
  10   8   1    6.36    0.43
  10   8   1    6.32    0.44
 -11  -8  -1    1.61    0.30
 -11  -8  -1    1.41    0.39
 -11  -8  -1    1.93    0.35
  11   8   1    1.48    0.27
  11   8   1    1.19    0.25
 -12  -8  -1   -0.20    0.32
 -12  -8  -1    0.19    0.31
 -12  -8  -1   -0.03    0.32
  12   8   1    0.22    0.22
  12   8   1    0.15    0.24
 -13  -8  -1   -0.24    0.35
 -14  -8  -1    2.09    0.49
  14   8   1    1.62    0.38
   7  -9  -1    0.61    0.56
  -7   9   1    0.48    0.34
  -7   9   1   -0.19    0.41
   6  -9  -1   -0.12    0.24
   6  -9  -1    0.49    0.22
   6  -9  -1    0.55    0.46
  -6   9   1    0.85    0.27
  -6   9   1    0.21    0.34
  -6   9   1   -0.32    0.26
   5  -9  -1    3.32    0.35
   5  -9  -1    4.58    0.59
   5  -9  -1    2.43    0.35
  -5   9   1    3.72    0.46
  -5   9   1    4.34    0.43
  -5   9   1    3.28    0.49
   4  -9  -1    0.05    0.16
   4  -9  -1   -0.08    0.15
  -4   9   1    0.15    0.20
  -4   9   1    0.34    0.17
  -4   9   1    0.11    0.25
   3  -9  -1    2.75    0.23
  -3   9   1    2.42    0.31
  -3   9   1    2.17    0.24
  -3   9   1    2.39    0.35
  -2   9   1    6.23    0.42
  -2   9   1    6.60    0.50
   1  -9  -1    6.04    0.36
  -1   9   1    6.35    0.51
  -1   9   1    6.06    0.39
   0  -9  -1   16.14    0.69
   0   9   1   17.07    0.79
   0   9   1   16.72    0.71
  -1  -9  -1    0.20    0.15
   1   9   1    0.23    0.11
   1   9   1    0.25    0.17
   1   9   1    0.11    0.12
  -2  -9  -1   60.40    2.11
   2   9   1   65.76    2.10
   2   9   1   60.90    2.17
  -3  -9  -1   10.88    0.58
   3   9   1   10.76    0.58
   3   9   1   11.96    0.56
  -4  -9  -1    3.81    0.34
   4   9   1    3.62    0.35
   4   9   1    3.83    0.32
  -5  -9  -1    4.35    0.38
  -5  -9  -1    4.43    0.24
   5   9   1    4.94    0.39
   5   9   1    4.48    0.22
  -6  -9  -1   14.08    0.71
  -6  -9  -1   14.53    0.71
  -6  -9  -1   13.99    0.56
   6   9   1   13.69    0.68
   6   9   1   13.53    0.53
  -7  -9  -1    0.42    0.19
  -7  -9  -1    0.70    0.14
  -7  -9  -1    0.77    0.23
   7   9   1    0.78    0.13
   7   9   1    0.77    0.21
  -8  -9  -1    4.23    0.45
  -8  -9  -1    4.09    0.34
  -8  -9  -1    4.33    0.45
   8   9   1    3.94    0.29
   8   9   1    4.19    0.39
  -9  -9  -1   10.58    0.56
  -9  -9  -1   10.28    0.67
  -9  -9  -1   11.05    0.68
   9   9   1   10.29    0.52
   9   9   1    9.62    0.59
 -10  -9  -1    0.40    0.27
 -10  -9  -1    0.19    0.21
 -10  -9  -1    0.16    0.26
  10   9   1    0.41    0.18
  10   9   1    0.38    0.21
 -11  -9  -1    8.02    0.59
 -11  -9  -1    5.40    0.63
 -11  -9  -1    7.94    0.67
  11   9   1    7.08    0.54
  11   9   1    7.78    0.51
 -12  -9  -1   -0.46    0.30
 -12  -9  -1   -0.10    0.33
  12   9   1    0.51    0.29
  12   9   1    0.17    0.22
 -13  -9  -1   -0.59    0.40
  13   9   1    0.49    0.33
  14   9   1   -0.06    0.34
   6 -10  -1    1.60    0.30
  -6  10   1    1.44    0.47
  -6  10   1    1.50    0.37
   5 -10  -1    2.52    0.56
  -5  10   1    1.81    0.44
  -5  10   1    2.60    0.40
   4 -10  -1    0.83    0.38
  -4  10   1    1.55    0.33
  -4  10   1    0.74    0.22
  -4  10   1    1.43    0.35
  -3  10   1   -0.02    0.21
   2 -10  -1    3.77    0.31
  -2  10   1    4.19    0.37
  -2  10   1    4.49    0.50
  -1  10   1    8.90    0.59
  -1  10   1    8.34    0.49
   0 -10  -1    0.66    0.18
   0  10   1    0.60    0.23
   0  10   1    1.01    0.20
  -1 -10  -1   14.36    0.68
   1  10   1   14.12    0.61
   1  10   1   14.42    0.79
   1  10   1   14.49    0.64
  -2 -10  -1    2.27    0.32
   2  10   1    2.24    0.26
   2  10   1    2.67    0.35
   2  10   1    2.32    0.25
  -3 -10  -1   20.18    0.86
   3  10   1   18.67    0.89
   3  10   1   19.84    0.82
  -4 -10  -1    2.92    0.34
   4  10   1    2.13    0.31
   4  10   1    2.21    0.29
  -5 -10  -1   18.34    0.82
   5  10   1   15.81    0.57
   5  10   1   15.90    0.80
  -6 -10  -1    9.70    0.60
  -6 -10  -1    8.42    0.59
  -6 -10  -1    8.65    0.39
   6  10   1    7.53    0.59
   6  10   1    8.33    0.39
  -7 -10  -1    0.41    0.21
  -7 -10  -1    0.50    0.23
  -7 -10  -1    0.82    0.16
   7  10   1    0.63    0.12
   7  10   1    1.00    0.25
  -8 -10  -1    0.23    0.22
  -8 -10  -1    0.28    0.21
   8  10   1    0.34    0.12
   8  10   1    0.36    0.22
  -9 -10  -1    0.62    0.27
  -9 -10  -1    0.18    0.18
  -9 -10  -1    0.23    0.26
   9  10   1    0.07    0.24
   9  10   1    0.54    0.16
 -10 -10  -1    0.15    0.22
 -10 -10  -1   -0.25    0.28
 -10 -10  -1    0.17    0.28
  10  10   1    0.08    0.23
  10  10   1    0.24    0.15
 -11 -10  -1    1.26    0.30
  11  10   1    0.94    0.25
  11  10   1    0.62    0.30
 -12 -10  -1   -0.27    0.39
 -12 -10  -1    0.16    0.32
  12  10   1    0.41    0.29
  12  10   1    0.21    0.23
 -13 -10  -1    1.75    0.48
  13  10   1    0.67    0.36
  14  10   1    0.20    0.37
  -5  11   1    3.05    0.54
  -5  11   1    4.49    0.55
  -4  11   1    2.18    0.47
  -4  11   1    2.41    0.41
  -3  11   1    0.41    0.25
  -3  11   1    0.77    0.35
  -2  11   1    6.78    0.68
  -2  11   1    7.67    0.52
   1 -11  -1   -0.01    0.17
  -1  11   1    0.02    0.27
  -1  11   1    0.03    0.16
   0 -11  -1    1.05    0.22
   0  11   1    1.41    0.22
   0  11   1    0.50    0.29
  -1 -11  -1    0.03    0.19
   1  11   1    0.26    0.15
   1  11   1    0.05    0.24
   1  11   1    0.06    0.13
  -2 -11  -1    9.04    0.55
   2  11   1    7.97    0.59
   2  11   1    9.14    0.48
   2  11   1    8.01    0.47
  -3 -11  -1   10.03    0.61
   3  11   1    9.21    0.48
   3  11   1   10.40    0.54
  -4 -11  -1    6.15    0.49
   4  11   1    5.79    0.44
  -5 -11  -1    1.65    0.31
   5  11   1    1.38    0.26
  -6 -11  -1    6.89    0.55
   6  11   1    6.08    0.28
  -7 -11  -1    3.21    0.42
   7  11   1    2.66    0.23
  -8 -11  -1    2.97    0.46
  -8 -11  -1    3.57    0.34
  -8 -11  -1    3.47    0.52
   8  11   1    3.30    0.30
  -9 -11  -1    1.36    0.36
  -9 -11  -1    2.42    0.42
  -9 -11  -1    2.04    0.29
   9  11   1    1.41    0.21
 -10 -11  -1    0.30    0.32
 -10 -11  -1    0.08    0.25
  10  11   1    0.04    0.19
 -11 -11  -1    0.38    0.39
 -11 -11  -1   -0.40    0.31
  11  11   1    0.07    0.22
 -12 -11  -1   -0.06    0.42
 -12 -11  -1    0.73    0.40
  12  11   1    0.48    0.27
 -13 -11  -1   -0.04    0.52
  13  11   1    0.34    0.40
  -4  12   1    0.29    0.30
  -4  12   1    0.06    0.47
  -3  12   1    4.12    0.50
  -3  12   1    3.83    0.57
  -2  12   1    3.84    0.54
  -2  12   1    3.81    0.47
   1 -12  -1    5.50    0.50
  -1  12   1    7.61    0.71
   0 -12  -1   -0.17    0.22
   0  12   1   -0.17    0.19
   0  12   1   -0.04    0.29
  -1 -12  -1    1.18    0.28
   1  12   1    0.96    0.21
   1  12   1    0.99    0.34
  -2 -12  -1    1.03    0.28
   2  12   1    0.55    0.21
   2  12   1    1.23    0.30
   2  12   1    0.97    0.22
  -3 -12  -1   -0.11    0.25
   3  12   1    0.05    0.20
   3  12   1    0.28    0.27
   3  12   1    0.10    0.16
  -4 -12  -1    2.98    0.40
   4  12   1    3.66    0.31
   4  12   1    3.01    0.41
   4  12   1    2.57    0.38
  -5 -12  -1    5.92    0.56
   5  12   1    5.85    0.38
   5  12   1    5.49    0.55
   5  12   1    6.45    0.51
  -6 -12  -1   10.51    0.73
  -6 -12  -1   10.55    0.72
   6  12   1   11.32    0.71
   6  12   1    9.41    0.64
  -7 -12  -1    0.72    0.35
  -7 -12  -1    0.88    0.31
   7  12   1    0.49    0.12
   7  12   1    0.64    0.29
  -8 -12  -1    1.92    0.25
  -8 -12  -1    1.93    0.39
  -8 -12  -1    0.93    0.30
   8  12   1    1.85    0.38
   8  12   1    1.82    0.26
  -9 -12  -1    0.98    0.40
  -9 -12  -1    1.51    0.27
   9  12   1    1.93    0.40
   9  12   1    1.06    0.22
 -10 -12  -1    2.31    0.34
 -10 -12  -1    1.83    0.49
  10  12   1    2.61    0.37
  10  12   1    2.02    0.40
 -11 -12  -1    6.94    0.80
 -11 -12  -1    7.70    0.67
  11  12   1    4.57    0.64
  11  12   1    6.73    0.53
 -12 -12  -1    2.39    0.48
 -12 -12  -1    1.69    0.54
  12  12   1    1.41    0.44
  12  12   1    2.41    0.35
 -13 -12  -1    2.10    0.57
  13  12   1    1.15    0.52
  -3  13   1    0.47    0.52
  -3  13   1    1.26    0.37
  -2  13   1    1.68    0.37
   1 -13  -1    7.84    0.63
  -1  13   1    9.62    0.85
  -1  13   1    9.49    0.67
   0 -13  -1   -0.41    0.28
   0  13   1    0.65    0.40
   0  13   1    0.04    0.21
  -1 -13  -1    8.61    0.68
   1  13   1    8.01    0.53
   1  13   1    8.91    0.75
  -2 -13  -1    1.54    0.34
   2  13   1    1.06    0.24
   2  13   1    1.49    0.41
   2  13   1    0.87    0.21
  -3 -13  -1    3.88    0.57
   3  13   1    4.05    0.57
   3  13   1    4.52    0.38
   3  13   1    3.92    0.43
  -4 -13  -1    5.66    0.63
   4  13   1    6.57    0.53
   4  13   1    6.36    0.43
   4  13   1    5.68    0.58
  -5 -13  -1    3.05    0.45
   5  13   1    3.40    0.48
   5  13   1    3.28    0.34
   5  13   1    3.48    0.46
  -6 -13  -1    0.88    0.39
   6  13   1    1.38    0.33
   6  13   1    1.06    0.35
   6  13   1    1.57    0.22
  -7 -13  -1    4.38    0.63
  -7 -13  -1    3.13    0.51
   7  13   1    2.97    0.50
   7  13   1    3.72    0.35
   7  13   1    4.32    0.58
  -8 -13  -1    1.42    0.38
   8  13   1    1.76    0.41
   8  13   1    2.38    0.27
   8  13   1    2.63    0.26
  -9 -13  -1    0.45    0.39
   9  13   1    0.59    0.36
   9  13   1    0.04    0.18
 -10 -13  -1    2.06    0.54
 -10 -13  -1    1.80    0.35
  10  13   1    1.56    0.42
  10  13   1    1.69    0.28
 -11 -13  -1    2.60    0.44
 -11 -13  -1    4.18    0.64
  11  13   1    3.20    0.53
 -12 -13  -1   -0.83    0.54
  12  13   1    0.00    0.46
  12  13   1    0.35    0.34
  -1  14   1    0.68    0.38
  -1  14   1    1.50    0.57
   0  14   1    2.22    0.55
   0  14   1    1.56    0.33
  -1 -14  -1    0.50    0.35
   1  14   1    0.60    0.42
   1  14   1    0.53    0.24
  -2 -14  -1    5.54    0.73
   2  14   1    7.05    0.74
  -3 -14  -1    0.85    0.40
   3  14   1    0.33    0.26
   3  14   1    0.70    0.22
  -4 -14  -1    2.14    0.48
   4  14   1    3.05    0.39
   4  14   1    2.51    0.37
  -5 -14  -1    5.62    0.77
   5  14   1    6.23    0.59
   5  14   1    6.09    0.47
  -6 -14  -1    0.44    0.38
   6  14   1    0.37    0.22
   6  14   1    0.40    0.32
  -7 -14  -1    0.02    0.35
   7  14   1   -0.11    0.21
   7  14   1    0.34    0.35
   7  14   1    0.37    0.41
   8  14   1   -0.34    0.35
   8  14   1    0.96    0.25
   9  14   1    0.26    0.19
 -10 -14  -1    1.99    0.65
  10  14   1    1.60    0.25
 -11 -14  -1    1.22    0.60
  11  14   1    0.82    0.57
  11  14   1    1.37    0.32
   1  15   1    0.71    0.33
   1  15   1    0.36    0.56
  -2 -15  -1    0.19    0.45
   2  15   1    0.61    0.31
   2  15   1    0.58    0.52
  -3 -15  -1    1.65    0.51
   3  15   1    3.83    0.50
   3  15   1    2.88    0.60
   4  15   1    3.29    0.56
   4  15   1    2.45    0.40
   5  15   1    1.03    0.27
   5  15   1    1.05    0.45
   5  15   1    0.30    0.36
  -6 -15  -1    6.07    0.75
   6  15   1    5.72    0.69
   6  15   1    5.91    0.50
   6  15   1    6.40    0.83
  -7 -15  -1    0.39    0.46
   7  15   1    0.53    0.42
   7  15   1    1.77    0.54
   7  15   1    0.44    0.27
  -8 -15  -1   -0.27    0.50
   8  15   1    0.41    0.28
   8  15   1    0.78    0.43
   8  15   1   -0.48    0.50
  -9 -15  -1    1.11    0.54
   9  15   1    1.25    0.53
   9  15   1    1.74    0.32
   9  15   1    0.64    0.46
 -10 -15  -1    0.77    0.65
  10  15   1   -0.36    0.50
  10  15   1    0.50    0.52
   4  16   1    1.33    0.36
   5  16   1    0.76    0.34
   6  16   1   -0.06    0.29
   7  16   1    0.40    0.49
   7  16   1    0.58    0.32
   9  15  -2    0.96    0.56
  -9 -15   2   -0.98    0.55
   8  15  -2    0.56    0.53
  -8 -15   2    0.93    0.50
   7  15  -2    0.90    0.47
   7  15  -2    0.14    0.39
   6  15  -2    0.64    0.50
   6  15  -2    0.24    0.37
   5  15  -2    0.48    0.34
   5  15  -2    0.31    0.45
   4  15  -2    2.00    0.52
   3  15  -2    1.37    0.31
   3  15  -2    0.93    0.51
   2  15  -2   -0.07    0.48
   2  15  -2    1.08    0.29
  -2 -15   2    0.93    0.54
   1  15  -2    3.16    0.44
   1  15  -2    2.16    0.59
  10  14  -2    0.44    0.27
  10  14  -2    0.61    0.50
   9  14  -2    0.41    0.23
   9  14  -2   -0.07    0.46
   8  14  -2   -0.20    0.39
   8  14  -2    0.16    0.19
  -8 -14   2    0.26    0.41
   7  14  -2    0.99    0.16
   7  14  -2    0.65    0.41
   6  14  -2    0.39    0.45
   6  14  -2    0.07    0.30
   5  14  -2    0.77    0.45
   5  14  -2    1.03    0.29
   4  14  -2   -0.13    0.25
   4  14  -2   -0.28    0.38
  -4 -14   2   -0.49    0.39
   3  14  -2    0.12    0.22
   3  14  -2   -0.20    0.38
  -3 -14   2   -0.40    0.42
   2  14  -2    2.82    0.53
  -2 -14   2    3.46    0.52
   1  14  -2   -0.29    0.42
   1  14  -2   -0.11    0.24
  -1 -14   2   -0.36    0.39
   0  14  -2   -0.04    0.47
   0  14  -2    0.03    0.25
  -1  14  -2    0.10    0.49
  -1  14  -2    0.81    0.29
  11  13  -2    0.10    0.46
  11  13  -2    0.23    0.30
 -11 -13   2    0.03    0.53
  10  13  -2    0.83    0.43
 -10 -13   2    0.48    0.47
   9  13  -2   -0.01    0.21
   9  13  -2   -0.75    0.35
  -9 -13   2   -0.28    0.38
   8  13  -2    0.24    0.18
   8  13  -2   -0.10    0.35
  -8 -13   2    0.60    0.37
   7  13  -2    0.09    0.36
   6  13  -2    1.90    0.21
   6  13  -2    2.02    0.47
  -6 -13   2    2.03    0.46
   5  13  -2    2.61    0.43
   5  13  -2    1.61    0.31
  -5 -13   2    2.40    0.46
   4  13  -2    3.44    0.42
   4  13  -2    3.29    0.45
  -4 -13   2    2.93    0.45
   3  13  -2    0.07    0.32
   3  13  -2    0.61    0.21
  -3 -13   2    0.13    0.34
   2  13  -2    8.07    0.73
  -2 -13   2    8.96    0.76
   1  13  -2    0.43    0.37
  -1 -13   2   -0.05    0.31
   0  13  -2    2.28    0.46
   0  13  -2    2.45    0.36
   0 -13   2    2.39    0.42
  -1  13  -2    0.23    0.24
   1 -13   2    0.49    0.32
  -2  13  -2   -0.06    0.23
  -3  13  -2    0.35    0.26
  -3  13  -2   -0.06    0.49
  12  12  -2    0.32    0.34
  12  12  -2   -0.36    0.43
 -12 -12   2    0.20    0.54
  11  12  -2    0.15    0.39
  11  12  -2    0.73    0.26
 -11 -12   2    0.46    0.43
 -11 -12   2    0.76    0.46
  10  12  -2    5.19    0.46
  10  12  -2    4.54    0.55
 -10 -12   2    6.10    0.72
   9  12  -2   -0.20    0.30
   9  12  -2    0.01    0.18
  -9 -12   2    0.33    0.32
   8  12  -2    1.98    0.25
   8  12  -2    2.01    0.42
  -8 -12   2    2.00    0.38
   7  12  -2    0.54    0.15
   7  12  -2    0.89    0.31
  -7 -12   2    0.76    0.33
   6  12  -2    5.08    0.54
   6  12  -2    4.23    0.26
  -6 -12   2    4.39    0.58
   5  12  -2    0.25    0.08
   5  12  -2    0.17    0.25
  -5 -12   2    0.66    0.29
   4  12  -2    4.22    0.53
   4  12  -2    4.28    0.40
  -4 -12   2    4.99    0.58
   3  12  -2    4.19    0.36
   3  12  -2    3.79    0.49
  -3 -12   2    4.37    0.53
   2  12  -2    0.23    0.28
   2  12  -2    0.64    0.16
  -2 -12   2   -0.10    0.25
   1  12  -2    9.90    0.70
  -1 -12   2   10.08    0.69
   0  12  -2    7.57    0.65
   0 -12   2    7.79    0.62
  -1  12  -2    0.12    0.34
  -2  12  -2    0.55    0.38
  -2  12  -2    1.14    0.29
   2 -12   2    0.82    0.29
  -3  12  -2   -0.02    0.36
  -3  12  -2    0.49    0.25
  -4  12  -2    0.62    0.28
  -4  12  -2    0.80    0.45
  12  11  -2    1.04    0.31
  12  11  -2    0.31    0.39
  11  11  -2    2.80    0.37
  11  11  -2    2.61    0.43
 -11 -11   2    1.96    0.45
  10  11  -2    0.61    0.33
  10  11  -2    1.06    0.25
 -10 -11   2    1.21    0.34
   9  11  -2    3.76    0.39
   9  11  -2    3.81    0.51
  -9 -11   2    3.97    0.49
  -9 -11   2    4.31    0.58
   8  11  -2    2.08    0.25
   8  11  -2    2.66    0.38
  -8 -11   2    2.04    0.35
  -8 -11   2    2.56    0.42
   7  11  -2    1.38    0.20
   7  11  -2    1.50    0.35
  -7 -11   2    1.64    0.34
   6  11  -2    2.25    0.37
   6  11  -2    1.78    0.21
  -6 -11   2    2.52    0.37
   5  11  -2    0.24    0.26
   5  11  -2    0.34    0.10
  -5 -11   2    0.59    0.24
   4  11  -2    0.05    0.07
   4  11  -2    0.29    0.23
  -4 -11   2    0.00    0.22
   3  11  -2    1.72    0.35
   3  11  -2    1.88    0.27
  -3 -11   2    1.72    0.29
   2  11  -2    0.24    0.23
   2  11  -2    0.41    0.14
  -2 -11   2    0.22    0.21
   1  11  -2   20.63    1.01
  -1 -11   2   21.95    0.95
   0  11  -2   -0.29    0.24
   0 -11   2    0.11    0.21
  -1  11  -2    4.53    0.51
   1 -11   2    5.05    0.47
  -2  11  -2    0.02    0.17
  -2  11  -2    0.03    0.29
   2 -11   2    0.34    0.21
  -3  11  -2    8.40    0.70
  -3  11  -2    8.04    0.55
  -3  11  -2    7.37    0.38
  -4  11  -2    0.15    0.24
  -4  11  -2    0.46    0.36
  -5  11  -2    2.68    0.39
  -5  11  -2    2.97    0.50
  -6  11  -2    1.40    0.52
  -6  11  -2    0.80    0.36
  13  10  -2    0.54    0.36
  12  10  -2    0.02    0.27
  12  10  -2    0.37    0.32
 -12 -10   2    0.47    0.42
  11  10  -2   -0.20    0.21
  11  10  -2    0.37    0.29
 -11 -10   2    0.34    0.36
 -11 -10   2   -0.47    0.35
  10  10  -2    4.62    0.43
  10  10  -2    3.58    0.49
 -10 -10   2    4.65    0.53
 -10 -10   2    5.63    0.59
   9  10  -2    1.65    0.32
   9  10  -2    1.52    0.23
  -9 -10   2    1.57    0.39
  -9 -10   2    1.62    0.33
  -9 -10   2    1.67    0.31
   8  10  -2    0.42    0.15
   8  10  -2    0.41    0.25
  -8 -10   2    0.08    0.19
  -8 -10   2    0.33    0.22
  -8 -10   2    0.61    0.28
   7  10  -2    0.73    0.25
   7  10  -2    0.88    0.16
  -7 -10   2    0.60    0.26
  -7 -10   2    1.23    0.28
   6  10  -2    2.56    0.23
   6  10  -2    3.18    0.40
  -6 -10   2    2.63    0.36
   5  10  -2    2.19    0.37
   5  10  -2    2.34    0.20
  -5 -10   2    2.11    0.32
   4  10  -2    0.59    0.30
   4  10  -2    1.31    0.15
  -4 -10   2    1.05    0.26
   3  10  -2    6.28    0.54
  -3 -10   2    6.73    0.50
   2  10  -2    8.49    0.65
   2  10  -2    8.23    0.43
  -2 -10   2    9.65    0.56
   1  10  -2   -0.16    0.09
   1  10  -2   -0.28    0.23
  -1 -10   2   -0.08    0.17
   0  10  -2    0.74    0.27
   0 -10   2    1.05    0.23
  -1  10  -2    0.52    0.24
   1 -10   2    0.74    0.22
  -2  10  -2    0.39    0.16
  -2  10  -2    0.21    0.10
  -3  10  -2    0.58    0.30
  -3  10  -2    0.49    0.17
  -3  10  -2    0.48    0.13
   3 -10   2    0.56    0.33
  -4  10  -2    3.38    0.32
  -4  10  -2    3.19    0.45
   4 -10   2    3.43    0.57
  -5  10  -2    2.88    0.45
  -5  10  -2    4.01    0.46
  -6  10  -2    1.38    0.33
  -6  10  -2    1.59    0.45
  -7  10  -2   -0.52    0.43
  -7  10  -2    0.88    0.34
  13   9  -2    0.27    0.33
  12   9  -2    3.44    0.49
  12   9  -2    3.35    0.41
 -12  -9   2    5.11    0.65
  11   9  -2   -0.08    0.24
  11   9  -2    0.32    0.24
 -11  -9   2    1.26    0.33
 -11  -9   2    0.22    0.30
  10   9  -2    3.28    0.41
  10   9  -2    2.96    0.39
 -10  -9   2    3.20    0.46
 -10  -9   2    3.55    0.50
 -10  -9   2    4.67    0.51
   9   9  -2   -0.13    0.15
   9   9  -2    0.00    0.20
  -9  -9   2   -0.16    0.21
  -9  -9   2    0.10    0.27
  -9  -9   2   -0.05    0.23
   8   9  -2    4.82    0.43
   8   9  -2    5.37    0.36
  -8  -9   2    5.55    0.42
  -8  -9   2    4.88    0.53
  -8  -9   2    4.77    0.45
   7   9  -2    3.17    0.41
   7   9  -2    4.34    0.30
  -7  -9   2    3.90    0.39
  -7  -9   2    3.87    0.44
   6   9  -2    2.34    0.23
   6   9  -2    2.06    0.30
  -6  -9   2    2.07    0.30
   5   9  -2    6.96    0.47
   5   9  -2    6.26    0.31
  -5  -9   2    6.11    0.46
   4   9  -2   63.09    2.21
   4   9  -2   62.08    2.01
  -4  -9   2   65.58    2.22
   3   9  -2    2.27    0.14
   3   9  -2    2.85    0.35
  -3  -9   2    2.63    0.32
   2   9  -2    0.89    0.15
   2   9  -2    1.42    0.26
  -2  -9   2    0.76    0.19
   1   9  -2    2.20    0.19
   1   9  -2    2.61    0.34
  -1  -9   2    2.24    0.29
   0   9  -2    6.38    0.46
   0  -9   2    5.93    0.40
  -1   9  -2    5.63    0.53
  -1   9  -2    6.03    0.25
   1  -9   2    5.94    0.40
  -2   9  -2    0.13    0.21
  -2   9  -2    0.23    0.09
   2  -9   2    0.46    0.14
  -3   9  -2    1.72    0.30
  -3   9  -2    1.29    0.21
  -3   9  -2    1.37    0.16
   3  -9   2    0.93    0.34
  -4   9  -2    0.83    0.17
  -4   9  -2    0.52    0.26
  -4   9  -2    0.73    0.21
   4  -9   2    0.52    0.34
  -5   9  -2    1.26    0.31
   5  -9   2    1.13    0.41
  -6   9  -2    1.07    0.27
  -6   9  -2    1.16    0.34
  -6   9  -2    0.90    0.26
   6  -9   2    1.54    0.49
  -7   9  -2    0.20    0.31
  -7   9  -2    0.42    0.36
  -7   9  -2    0.36    0.30
  -8   9  -2    2.06    0.40
  13   8  -2    0.86    0.32
  12   8  -2   -0.52    0.24
  12   8  -2    0.15    0.23
 -12  -8   2    0.87    0.36
  11   8  -2    5.69    0.49
  11   8  -2    4.89    0.44
 -11  -8   2    5.43    0.65
 -11  -8   2    5.83    0.68
 -11  -8   2    5.66    0.55
  10   8  -2    0.55    0.22
  10   8  -2    0.78    0.21
 -10  -8   2    0.60    0.27
 -10  -8   2    1.07    0.28
 -10  -8   2    0.49    0.29
   9   8  -2   16.31    0.76
   9   8  -2   16.35    0.74
  -9  -8   2   16.50    0.80
  -9  -8   2   18.27    0.83
  -9  -8   2   16.88    0.88
   8   8  -2   39.16    1.41
   8   8  -2   38.47    1.44
  -8  -8   2   41.00    1.45
  -8  -8   2   40.31    1.49
  -8  -8   2   38.94    1.55
   7   8  -2    0.28    0.19
   7   8  -2    0.42    0.13
  -7  -8   2    0.29    0.16
  -7  -8   2    0.16    0.19
  -7  -8   2    0.44    0.14
   6   8  -2    3.64    0.25
   6   8  -2    3.84    0.34
  -6  -8   2    2.85    0.36
  -6  -8   2    3.56    0.29
   5   8  -2    2.62    0.31
   5   8  -2    2.84    0.21
  -5  -8   2    2.64    0.31
   4   8  -2   14.56    0.55
   4   8  -2   14.97    0.71
  -4  -8   2   15.40    0.70
   3   8  -2    0.14    0.15
   3   8  -2    0.01    0.06
   2   8  -2    0.29    0.05
   2   8  -2    0.42    0.18
  -2  -8   2    0.15    0.12
   1   8  -2    0.16    0.17
   1   8  -2    0.17    0.05
   1   8  -2    0.30    0.09
  -1  -8   2    0.29    0.12
   0   8  -2    4.86    0.39
   0   8  -2    5.17    0.20
   0  -8   2    4.89    0.34
  -1   8  -2    2.54    0.32
  -1   8  -2    2.07    0.14
   1  -8   2    2.08    0.25
  -2   8  -2    1.30    0.24
  -2   8  -2    1.15    0.14
   2  -8   2    1.16    0.17
  -3   8  -2    1.64    0.20
  -3   8  -2    1.87    0.23
  -3   8  -2    1.36    0.27
   3  -8   2    1.57    0.30
  -4   8  -2    1.16    0.25
  -4   8  -2    1.20    0.17
  -4   8  -2    1.12    0.19
   4  -8   2    1.20    0.30
  -5   8  -2    0.05    0.16
  -5   8  -2    0.29    0.22
   5  -8   2    0.33    0.35
  -6   8  -2   -0.01    0.23
  -6   8  -2   -0.20    0.16
  -6   8  -2    0.10    0.20
   6  -8   2   -0.12    0.41
  -7   8  -2    1.48    0.36
  -7   8  -2    1.50    0.38
  -7   8  -2    1.69    0.30
   7  -8   2    0.83    0.50
   7  -8   2    2.05    0.30
  -8   8  -2   -0.32    0.31
  -8   8  -2    0.05    0.27
  -8   8  -2   -0.27    0.32
   8  -8   2    0.34    0.30
  -9   8  -2    1.96    0.42
   9  -8   2    2.33    0.45
  13   7  -2   -0.31    0.28
  12   7  -2    7.46    0.58
  12   7  -2    6.13    0.41
 -12  -7   2    6.86    0.79
  11   7  -2    0.06    0.18
  11   7  -2   -0.30    0.19
 -11  -7   2    0.22    0.31
 -11  -7   2   -0.20    0.28
 -11  -7   2   -0.53    0.23
  10   7  -2    5.09    0.41
  10   7  -2    4.63    0.37
 -10  -7   2    4.52    0.50
 -10  -7   2    5.32    0.46
 -10  -7   2    5.34    0.56
 -10  -7   2    5.09    0.46
   9   7  -2   18.47    0.78
   9   7  -2   20.06    0.83
  -9  -7   2   18.02    0.92
  -9  -7   2   19.65    0.85
  -9  -7   2   19.99    0.88
   8   7  -2    0.38    0.14
   8   7  -2   -0.05    0.19
  -8  -7   2    0.18    0.18
  -8  -7   2   -0.06    0.19
  -8  -7   2    0.00    0.15
   7   7  -2    0.06    0.14
   7   7  -2    0.09    0.11
  -7  -7   2   -0.06    0.12
  -7  -7   2   -0.01    0.13
  -7  -7   2   -0.04    0.15
   6   7  -2    0.34    0.14
   6   7  -2    0.35    0.10
  -6  -7   2    0.35    0.12
  -6  -7   2    0.47    0.14
  -6  -7   2    0.31    0.18
   5   7  -2    0.37    0.09
   5   7  -2    0.35    0.13
  -5  -7   2    0.19    0.14
   4   7  -2    0.10    0.07
   4   7  -2   -0.04    0.09
   4   7  -2    0.11    0.11
   3   7  -2   19.11    0.67
   3   7  -2   19.35    0.80
   3   7  -2   19.68    0.79
  -3  -7   2   19.97    0.80
   2   7  -2   -0.07    0.08
   2   7  -2    0.07    0.10
   2   7  -2    0.10    0.05
  -2  -7   2    0.01    0.10
   1   7  -2   16.96    0.72
   1   7  -2   16.68    0.66
   1   7  -2   16.22    0.55
  -1  -7   2   16.25    0.68
   0   7  -2   20.26    0.84
   0   7  -2   20.45    0.67
   0  -7   2   20.50    0.79
  -1   7  -2    0.88    0.10
  -1   7  -2    0.85    0.19
   1  -7   2    0.98    0.14
  -2   7  -2   15.06    0.67
  -2   7  -2   14.83    0.53
   2  -7   2   13.56    0.56
  -3   7  -2    4.60    0.37
  -3   7  -2    4.37    0.25
   3  -7   2    3.88    0.42
  -4   7  -2    0.23    0.22
  -4   7  -2    0.53    0.14
  -4   7  -2    0.54    0.14
   4  -7   2    0.30    0.27
  -5   7  -2    1.81    0.29
  -5   7  -2    1.77    0.27
  -5   7  -2    1.98    0.25
   5  -7   2    2.02    0.33
   5  -7   2    1.80    0.23
  -6   7  -2    0.17    0.17
  -6   7  -2    0.22    0.15
  -6   7  -2    0.13    0.21
   6  -7   2    0.38    0.28
   6  -7   2    0.41    0.14
   6  -7   2    0.33    0.17
  -7   7  -2    0.04    0.18
  -7   7  -2    0.11    0.23
  -7   7  -2    0.08    0.23
   7  -7   2    0.02    0.21
   7  -7   2   -0.23    0.40
   7  -7   2    0.40    0.20
  -8   7  -2    1.51    0.32
  -8   7  -2    0.88    0.29
  -8   7  -2    0.99    0.30
   8  -7   2    0.03    0.44
   8  -7   2    1.66    0.31
  -9   7  -2    0.69    0.34
  -9   7  -2   -0.80    0.37
   9  -7   2   -0.14    0.59
   9  -7   2    0.02    0.33
  13   6  -2    3.50    0.41
 -12  -6   2    1.31    0.42
  11   6  -2    5.48    0.33
  11   6  -2    5.42    0.47
 -11  -6   2    4.96    0.59
 -11  -6   2    4.78    0.56
  10   6  -2    0.84    0.22
  10   6  -2    0.90    0.18
 -10  -6   2    0.73    0.28
 -10  -6   2    0.80    0.27
 -10  -6   2    0.46    0.23
   9   6  -2    4.42    0.31
   9   6  -2    4.45    0.37
  -9  -6   2    4.55    0.46
  -9  -6   2    5.12    0.39
  -9  -6   2    4.48    0.38
  -9  -6   2    4.11    0.41
   8   6  -2   14.27    0.63
   8   6  -2   16.02    0.68
  -8  -6   2   15.83    0.75
  -8  -6   2   14.61    0.69
  -8  -6   2   14.94    0.67
   7   6  -2    1.57    0.21
   7   6  -2    1.91    0.23
  -7  -6   2    1.65    0.22
  -7  -6   2    1.74    0.26
  -7  -6   2    1.65    0.24
   6   6  -2   10.25    0.49
   6   6  -2    9.58    0.45
  -6  -6   2   10.57    0.54
  -6  -6   2    9.65    0.49
  -6  -6   2   10.50    0.48
   5   6  -2    2.40    0.24
   5   6  -2    2.73    0.20
   5   6  -2    2.19    0.24
  -5  -6   2    2.32    0.26
   4   6  -2    6.98    0.31
   4   6  -2    7.02    0.39
  -4  -6   2    6.82    0.32
  -4  -6   2    6.57    0.39
   3   6  -2   24.75    0.85
   3   6  -2   25.55    0.95
  -3  -6   2   24.97    0.95
   2   6  -2    8.99    0.43
   2   6  -2    8.58    0.33
   1   6  -2   31.12    1.08
   1   6  -2   31.14    0.99
  -1  -6   2   29.79    1.08
   0   6  -2    0.04    0.08
   0   6  -2    0.05    0.04
   0  -6   2   -0.07    0.07
  -1   6  -2    3.28    0.17
  -1   6  -2    3.37    0.27
  -1   6  -2    3.12    0.21
   1  -6   2    3.41    0.23
  -2   6  -2    3.69    0.28
  -2   6  -2    3.29    0.19
   2  -6   2    3.57    0.22
  -3   6  -2   53.52    1.75
  -3   6  -2   54.42    1.85
   3  -6   2   54.53    1.93
  -4   6  -2    1.43    0.18
  -4   6  -2    1.35    0.20
  -4   6  -2    1.45    0.22
   4  -6   2    1.45    0.20
   4  -6   2    1.41    0.28
  -5   6  -2    1.98    0.29
  -5   6  -2    1.86    0.22
  -5   6  -2    2.67    0.27
   5  -6   2    1.83    0.22
   5  -6   2    1.48    0.20
   5  -6   2    2.28    0.36
  -6   6  -2    0.25    0.16
  -6   6  -2   -0.02    0.15
  -6   6  -2    0.26    0.17
   6  -6   2    0.49    0.26
   6  -6   2    0.19    0.15
  -7   6  -2   -0.23    0.18
  -7   6  -2    0.01    0.17
  -7   6  -2   -0.13    0.17
   7  -6   2    0.57    0.32
   7  -6   2   -0.20    0.16
  -8   6  -2    0.50    0.26
  -8   6  -2    0.36    0.20
  -8   6  -2    0.38    0.22
   8  -6   2    0.59    0.22
   8  -6   2    0.36    0.36
  -9   6  -2    1.11    0.28
  -9   6  -2    0.72    0.24
  -9   6  -2    0.50    0.31
   9  -6   2    0.56    0.49
   9  -6   2    1.09    0.28
 -10   6  -2    0.29    0.32
  10  -6   2    1.06    0.36
  10  -6   2    0.67    0.61
  13   5  -2    1.11    0.33
 -13  -5   2    0.96    0.49
 -12  -5   2    0.69    0.36
  11   5  -2    0.69    0.24
 -11  -5   2    1.02    0.31
 -11  -5   2    1.00    0.28
  10   5  -2    3.21    0.36
  10   5  -2    2.44    0.22
 -10  -5   2    3.42    0.44
 -10  -5   2    3.75    0.42
   9   5  -2    2.01    0.21
   9   5  -2    2.18    0.29
  -9  -5   2    2.07    0.30
  -9  -5   2    2.70    0.31
  -9  -5   2    2.31    0.33
   8   5  -2   -0.02    0.09
   8   5  -2    0.05    0.12
  -8  -5   2   -0.13    0.16
  -8  -5   2    0.12    0.14
  -8  -5   2    0.00    0.16
  -8  -5   2   -0.19    0.13
   7   5  -2    1.40    0.20
   7   5  -2    1.55    0.20
  -7  -5   2    1.09    0.21
  -7  -5   2    1.22    0.18
  -7  -5   2    1.59    0.21
   6   5  -2   16.06    0.65
   6   5  -2   16.56    0.65
  -6  -5   2   16.21    0.66
  -6  -5   2   16.82    0.68
  -6  -5   2   16.40    0.72
   5   5  -2    2.25    0.19
   5   5  -2    2.10    0.23
  -5  -5   2    2.16    0.20
  -5  -5   2    2.30    0.20
  -5  -5   2    1.86    0.22
   4   5  -2    1.35    0.20
   4   5  -2    1.20    0.13
  -4  -5   2    1.35    0.19
  -4  -5   2    1.58    0.15
   3   5  -2   19.47    0.76
   3   5  -2   19.49    0.68
  -3  -5   2   20.05    0.69
   2   5  -2    7.63    0.30
   2   5  -2    7.15    0.36
  -2  -5   2    7.98    0.38
   1   5  -2   41.48    1.40
  -1  -5   2   42.11    1.41
   0   5  -2   89.46    2.83
   0  -5   2   89.62    2.83
  -1   5  -2    5.98    0.27
  -1   5  -2    6.47    0.33
   1  -5   2    6.44    0.31
  -2   5  -2   16.71    0.59
  -2   5  -2   16.57    0.59
   2  -5   2   16.75    0.60
  -3   5  -2    1.03    0.13
  -3   5  -2    1.18    0.17
   3  -5   2    1.27    0.15
   3  -5   2    1.08    0.20
  -4   5  -2    2.46    0.23
  -4   5  -2    2.64    0.22
  -4   5  -2    2.71    0.27
   4  -5   2    2.17    0.32
   4  -5   2    2.56    0.22
  -5   5  -2   18.92    0.77
  -5   5  -2   18.85    0.74
  -5   5  -2   18.65    0.75
   5  -5   2   19.24    0.87
   5  -5   2   18.82    0.74
  -6   5  -2    3.97    0.32
  -6   5  -2    3.42    0.33
  -6   5  -2    4.46    0.35
   6  -5   2    4.03    0.34
   6  -5   2    4.00    0.48
  -7   5  -2   17.05    0.75
  -7   5  -2   16.47    0.77
  -7   5  -2   15.75    0.68
   7  -5   2   17.03    0.74
   7  -5   2   17.34    0.89
  -8   5  -2   -0.07    0.17
  -8   5  -2   -0.06    0.16
  -8   5  -2   -0.10    0.21
   8  -5   2    0.25    0.34
   8  -5   2   -0.05    0.18
  -9   5  -2    2.36    0.31
  -9   5  -2    2.09    0.34
  -9   5  -2    2.37    0.36
   9  -5   2    2.11    0.32
   9  -5   2    2.38    0.48
 -10   5  -2    0.52    0.32
  10  -5   2    0.16    0.29
  10  -5   2   -0.65    0.49
 -11   5  -2    0.27    0.33
  11  -5   2    0.20    0.37
  13   4  -2   -0.13    0.31
 -13  -4   2    0.40    0.40
 -13  -4   2    0.00    0.46
 -12  -4   2    0.98    0.37
 -12  -4   2    1.27    0.37
  11   4  -2    2.87    0.34
 -11  -4   2    3.41    0.40
 -11  -4   2    3.64    0.51
  10   4  -2    1.54    0.25
 -10  -4   2    1.26    0.30
 -10  -4   2    2.35    0.33
 -10  -4   2    2.43    0.33
   9   4  -2    4.02    0.35
   9   4  -2    3.59    0.21
  -9  -4   2    3.06    0.36
  -9  -4   2    3.81    0.37
  -9  -4   2    3.94    0.39
  -9  -4   2    3.87    0.31
   8   4  -2    1.73    0.24
   8   4  -2    1.77    0.17
  -8  -4   2    1.19    0.20
  -8  -4   2    1.86    0.27
  -8  -4   2    1.87    0.27
  -8  -4   2    1.75    0.24
   7   4  -2    0.78    0.14
   7   4  -2    0.84    0.14
  -7  -4   2    1.23    0.20
  -7  -4   2    0.86    0.18
  -7  -4   2    1.13    0.17
  -7  -4   2    0.74    0.16
   6   4  -2    0.27    0.11
   6   4  -2    0.25    0.09
   6   4  -2    0.26    0.09
  -6  -4   2    0.25    0.10
  -6  -4   2    0.32    0.12
  -6  -4   2    0.33    0.10
   5   4  -2   10.64    0.50
   5   4  -2   10.75    0.46
  -5  -4   2   10.96    0.47
  -5  -4   2   10.93    0.51
  -5  -4   2   11.12    0.46
   4   4  -2   36.44    1.21
   4   4  -2   35.39    1.26
  -4  -4   2   36.00    1.21
   3   4  -2    1.72    0.12
  -3  -4   2    1.69    0.13
   2   4  -2   18.93    0.70
   2   4  -2   18.83    0.63
  -2  -4   2   17.95    0.69
   1   4  -2   37.22    1.26
  -1  -4   2   38.01    1.26
   0   4  -2  109.64    3.32
   0  -4   2  102.58    3.31
  -1   4  -2  148.62    4.47
  -1   4  -2  146.24    4.49
   1  -4   2  142.12    4.50
  -2   4  -2  109.52    3.24
  -2   4  -2  106.79    3.22
   2  -4   2   96.32    3.22
  -3   4  -2    1.52    0.14
   3  -4   2    1.44    0.21
   3  -4   2    1.51    0.14
  -4   4  -2    8.50    0.40
  -4   4  -2    8.95    0.41
   4  -4   2    9.13    0.49
   4  -4   2    8.89    0.39
  -5   4  -2    9.15    0.43
  -5   4  -2    9.17    0.44
  -5   4  -2    9.69    0.45
   5  -4   2    9.72    0.54
   5  -4   2    9.56    0.45
  -6   4  -2   76.58    2.56
  -6   4  -2   76.01    2.53
  -6   4  -2   74.99    2.47
   6  -4   2   79.40    2.67
   6  -4   2   79.07    2.54
  -7   4  -2    0.52    0.17
  -7   4  -2    0.39    0.14
  -7   4  -2    0.54    0.18
   7  -4   2    0.23    0.22
   7  -4   2    0.28    0.14
  -8   4  -2    0.53    0.20
  -8   4  -2    0.82    0.23
  -8   4  -2    0.80    0.16
   8  -4   2    0.73    0.20
   8  -4   2    0.81    0.30
  -9   4  -2    0.58    0.26
  -9   4  -2    0.71    0.22
   9  -4   2    0.48    0.21
   9  -4   2    1.06    0.35
 -10   4  -2    2.41    0.43
 -10   4  -2    2.45    0.39
  10  -4   2    2.43    0.47
  10  -4   2    3.73    0.49
 -11   4  -2    0.28    0.31
  11  -4   2    1.49    0.55
  11  -4   2   -0.03    0.35
  13   3  -2    0.59    0.30
 -13  -3   2    0.78    0.35
  12   3  -2    0.15    0.26
 -12  -3   2   -0.06    0.32
 -12  -3   2    0.30    0.36
  11   3  -2    2.24    0.30
 -11  -3   2    2.89    0.37
 -11  -3   2    2.89    0.37
  10   3  -2    0.06    0.17
 -10  -3   2    0.48    0.22
 -10  -3   2   -0.17    0.19
 -10  -3   2   -0.07    0.22
   9   3  -2    6.31    0.43
  -9  -3   2    6.44    0.46
  -9  -3   2    5.36    0.43
  -9  -3   2    6.27    0.43
   8   3  -2    1.73    0.24
  -8  -3   2    1.92    0.27
  -8  -3   2    1.70    0.24
  -8  -3   2    1.97    0.25
  -8  -3   2    1.88    0.25
   7   3  -2   19.98    0.69
   7   3  -2   20.25    0.81
  -7  -3   2   20.59    0.79
  -7  -3   2   20.12    0.82
  -7  -3   2   20.36    0.77
  -7  -3   2   19.27    0.81
   6   3  -2    0.01    0.07
   6   3  -2    0.00    0.09
  -6  -3   2   -0.06    0.11
  -6  -3   2    0.03    0.13
  -6  -3   2   -0.11    0.09
  -6  -3   2    0.01    0.09
   5   3  -2   65.60    2.16
   5   3  -2   65.28    2.14
  -5  -3   2   66.80    2.15
  -5  -3   2   66.32    2.10
  -5  -3   2   64.96    2.19
   4   3  -2   24.34    0.89
   4   3  -2   24.31    0.86
  -4  -3   2   24.34    0.83
  -4  -3   2   25.00    0.87
  -4  -3   2   23.96    0.89
   3   3  -2   13.84    0.50
   3   3  -2   13.26    0.53
  -3  -3   2   14.06    0.54
  -3  -3   2   12.27    0.49
   2   3  -2   17.39    0.58
   2   3  -2   16.53    0.61
  -2  -3   2   16.32    0.61
  -2  -3   2   15.92    0.57
   1   3  -2   23.95    0.79
  -1  -3   2   21.16    0.78
   0   3  -2    1.52    0.12
   0  -3   2    1.34    0.11
  -1   3  -2   41.43    1.26
  -1   3  -2   40.25    1.27
   1  -3   2   36.93    1.27
  -2   3  -2   52.20    1.63
   2  -3   2   51.26    1.71
   2  -3   2   47.50    1.61
   2  -3   2   53.59    1.63
  -3   3  -2   44.48    1.51
   3  -3   2   47.41    1.52
   3  -3   2   48.05    1.60
   4  -3   2    5.14    0.27
  -5   3  -2    3.56    0.25
  -5   3  -2    3.71    0.22
  -5   3  -2    3.71    0.25
   5  -3   2    3.72    0.32
   5  -3   2    3.60    0.25
  -6   3  -2   11.03    0.51
  -6   3  -2   10.89    0.44
   6  -3   2   11.11    0.60
   6  -3   2   11.17    0.51
  -7   3  -2    4.57    0.34
  -7   3  -2    4.44    0.25
  -7   3  -2    3.91    0.32
   7  -3   2    4.63    0.33
  -8   3  -2    0.47    0.19
  -8   3  -2    0.92    0.21
   8  -3   2    0.66    0.18
   8  -3   2    0.67    0.25
  -9   3  -2    0.01    0.18
  -9   3  -2    0.08    0.23
   9  -3   2   -0.14    0.27
   9  -3   2    0.09    0.17
 -10   3  -2    0.11    0.22
 -10   3  -2    0.08    0.28
  10  -3   2    0.21    0.32
  10  -3   2   -0.01    0.22
 -11   3  -2   -0.12    0.26
  11  -3   2   -0.01    0.44
  11  -3   2   -0.19    0.30
 -12   3  -2    0.73    0.37
  12  -3   2    0.52    0.38
  13   2  -2    1.98    0.40
 -13  -2   2    3.63    0.50
  12   2  -2    0.36    0.26
 -12  -2   2    1.00    0.34
 -12  -2   2    0.86    0.36
  11   2  -2   -0.47    0.19
 -11  -2   2    0.92    0.29
 -11  -2   2    0.00    0.26
  10   2  -2    0.02    0.16
 -10  -2   2   -0.09    0.23
 -10  -2   2   -0.15    0.20
 -10  -2   2   -0.07    0.21
  -9  -2   2    1.16    0.22
  -9  -2   2    1.25    0.20
  -9  -2   2    0.78    0.21
  -9  -2   2    1.17    0.24
   8   2  -2    8.11    0.45
  -8  -2   2    8.06    0.40
  -8  -2   2    8.03    0.48
  -8  -2   2    8.36    0.46
  -8  -2   2    7.17    0.45
   7   2  -2    4.34    0.31
  -7  -2   2    4.91    0.30
  -7  -2   2    4.79    0.33
  -7  -2   2    4.46    0.32
  -7  -2   2    5.07    0.35
   6   2  -2    9.24    0.44
   6   2  -2    9.65    0.45
  -6  -2   2    9.24    0.43
  -6  -2   2    9.68    0.45
  -6  -2   2    9.19    0.46
   5   2  -2   48.62    1.61
   5   2  -2   48.03    1.60
  -5  -2   2   48.91    1.61
  -5  -2   2   49.84    1.60
  -5  -2   2   48.35    1.62
  -5  -2   2   45.05    1.60
   4   2  -2   90.19    2.80
   4   2  -2   91.04    2.79
  -4  -2   2   91.11    2.79
  -4  -2   2   90.72    2.79
  -4  -2   2   76.40    2.78
   3   2  -2    8.06    0.34
   3   2  -2    8.09    0.35
  -3  -2   2    7.84    0.35
  -3  -2   2    8.25    0.34
  -3  -2   2    8.17    0.35
   2   2  -2    0.19    0.06
   2   2  -2    0.29    0.06
  -2  -2   2    0.20    0.05
  -2  -2   2    0.26    0.06
   1   2  -2  196.36    5.93
   1   2  -2  202.06    5.91
  -1  -2   2  176.21    5.87
   0   2  -2    9.40    0.35
   0  -2   2    9.35    0.36
  -1   2  -2  307.24    8.86
   1  -2   2  265.79    8.77
   1  -2   2  287.38    8.80
  -2   2  -2   21.39    0.71
   2  -2   2   20.16    0.70
   2  -2   2   22.09    0.72
  -3   2  -2    4.59    0.23
  -3   2  -2    5.32    0.20
   3  -2   2    5.22    0.29
   3  -2   2    4.04    0.24
   3  -2   2    4.90    0.24
  -4   2  -2    0.48    0.13
   4  -2   2    0.19    0.10
   4  -2   2    0.26    0.10
  -5   2  -2    4.44    0.26
  -5   2  -2    4.51    0.26
   5  -2   2    4.76    0.27
  -6   2  -2    8.00    0.40
  -6   2  -2    8.29    0.40
  -6   2  -2    8.05    0.32
   6  -2   2    8.74    0.41
   6  -2   2    7.74    0.47
  -7   2  -2   -0.01    0.12
  -7   2  -2   -0.05    0.11
   7  -2   2    0.23    0.17
   7  -2   2    0.08    0.11
  -8   2  -2    6.84    0.44
  -8   2  -2    6.36    0.40
   8  -2   2    6.19    0.44
  -9   2  -2    1.36    0.27
  -9   2  -2    1.02    0.22
   9  -2   2    1.15    0.21
   9  -2   2    1.14    0.30
 -10   2  -2    0.44    0.27
 -10   2  -2    0.78    0.24
  10  -2   2    0.70    0.23
  10  -2   2    0.66    0.34
 -11   2  -2    0.99    0.29
  11  -2   2    1.15    0.44
  11  -2   2    0.81    0.28
 -12   2  -2    5.03    0.57
  12  -2   2    3.95    0.47
 -13  -1   2    0.60    0.39
  12   1  -2    3.55    0.42
 -12  -1   2    3.53    0.48
  11   1  -2   -0.35    0.20
 -11  -1   2    0.01    0.26
  10   1  -2    2.78    0.36
 -10  -1   2    3.01    0.29
 -10  -1   2    2.40    0.32
 -10  -1   2    2.99    0.41
 -10  -1   2    3.46    0.41
   9   1  -2    3.42    0.34
  -9  -1   2    4.51    0.37
  -9  -1   2    3.93    0.30
  -9  -1   2    3.76    0.38
  -9  -1   2    4.11    0.41
   8   1  -2   12.35    0.58
  -8  -1   2   11.90    0.50
  -8  -1   2   11.46    0.55
  -8  -1   2   11.01    0.58
  -8  -1   2   11.76    0.60
   7   1  -2    3.63    0.28
  -7  -1   2    4.16    0.27
  -7  -1   2    3.61    0.30
  -7  -1   2    3.43    0.29
   6   1  -2    0.10    0.07
   6   1  -2    0.08    0.09
  -6  -1   2    0.19    0.12
  -6  -1   2    0.12    0.11
  -6  -1   2    0.11    0.10
   5   1  -2   12.22    0.49
   5   1  -2   11.81    0.50
  -5  -1   2   12.62    0.50
  -5  -1   2   12.14    0.51
  -5  -1   2   11.21    0.49
  -5  -1   2   12.33    0.52
   4   1  -2   31.05    1.06
   4   1  -2   31.72    1.05
  -4  -1   2   30.89    1.06
  -4  -1   2   31.88    1.06
  -4  -1   2   28.34    1.04
  -4  -1   2   30.73    1.07
   3   1  -2   18.94    0.67
   3   1  -2   18.66    0.67
  -3  -1   2   20.04    0.70
  -3  -1   2   18.51    0.67
  -3  -1   2   18.35    0.68
  -3  -1   2   19.55    0.69
   2   1  -2    2.08    0.14
   2   1  -2    2.24    0.13
  -2  -1   2    1.97    0.13
  -2  -1   2    2.08    0.15
  -2  -1   2    2.21    0.14
   1   1  -2  217.75    6.65
   1   1  -2  209.93    6.69
  -1  -1   2  221.60    6.70
   0  -1   2    2.11    0.12
  -1   1  -2    1.04    0.09
  -1   1  -2    1.00    0.07
   1  -1   2    0.89    0.08
   1  -1   2    0.82    0.09
   1  -1   2    0.97    0.07
  -2   1  -2   22.19    0.76
  -2   1  -2   23.32    0.81
  -2   1  -2   23.42    0.76
   2  -1   2   23.39    0.77
   2  -1   2   23.11    0.81
  -3   1  -2    4.10    0.20
  -3   1  -2    4.07    0.23
   3  -1   2    3.78    0.24
   3  -1   2    4.10    0.20
  -4   1  -2    0.57    0.11
  -4   1  -2    0.63    0.10
   4  -1   2    0.61    0.10
   4  -1   2    0.55    0.13
   4  -1   2    0.67    0.10
  -5   1  -2    0.24    0.10
  -5   1  -2    0.28    0.09
  -5   1  -2    0.23    0.08
   5  -1   2    0.24    0.09
   5  -1   2    0.22    0.11
   5  -1   2    0.30    0.12
  -6   1  -2    2.28    0.23
  -6   1  -2    2.56    0.20
  -6   1  -2    2.20    0.15
  -6   1  -2    2.15    0.20
  -6   1  -2    2.10    0.12
   6  -1   2    2.22    0.20
  -7   1  -2    0.30    0.12
  -7   1  -2    0.11    0.12
  -7   1  -2    0.15    0.10
  -7   1  -2    0.16    0.08
   7  -1   2    0.05    0.15
   7  -1   2    0.19    0.10
  -8   1  -2    2.40    0.20
  -8   1  -2    2.38    0.30
  -8   1  -2    2.49    0.26
   8  -1   2    2.56    0.27
   8  -1   2    3.10    0.36
  -9   1  -2   24.76    0.99
  -9   1  -2   25.48    1.03
   9  -1   2   23.92    1.02
 -10   1  -2   -0.12    0.23
 -10   1  -2    0.14    0.19
  10  -1   2    0.24    0.29
  10  -1   2   -0.05    0.17
 -11   1  -2    0.10    0.24
  11  -1   2    0.15    0.31
  11  -1   2   -0.05    0.21
 -12   1  -2    0.17    0.31
  12  -1   2    0.10    0.28
  12  -1   2    0.02    0.41
 -13   1  -2    0.87    0.37
  13  -1   2   -0.03    0.35
  12   0  -2   -0.26    0.28
 -12   0   2    0.39    0.36
  11   0  -2   -0.30    0.22
 -11   0   2    0.15    0.27
 -11   0   2   -0.10    0.23
  10   0  -2    0.84    0.24
 -10   0   2    1.56    0.25
 -10   0   2    1.22    0.26
 -10   0   2    1.36    0.33
 -10   0   2    1.49    0.29
   9   0  -2    0.04    0.17
  -9   0   2    0.25    0.19
  -9   0   2    0.37    0.16
  -9   0   2    0.21    0.21
   8   0  -2    1.41    0.20
  -8   0   2    1.55    0.26
  -8   0   2    1.43    0.21
  -8   0   2    1.50    0.24
  -8   0   2    1.36    0.20
   7   0  -2    0.21    0.11
  -7   0   2    0.18    0.11
  -7   0   2    0.17    0.15
  -7   0   2    0.11    0.12
  -7   0   2    0.17    0.12
   6   0  -2   22.57    0.85
  -6   0   2   20.46    0.79
  -6   0   2   22.00    0.86
  -6   0   2   22.69    0.81
   5   0  -2   21.36    0.74
   5   0  -2   21.25    0.78
   5   0  -2   20.30    0.67
  -5   0   2   20.21    0.75
  -5   0   2   21.30    0.80
  -5   0   2   21.11    0.77
  -5   0   2   20.83    0.80
   4   0  -2    0.17    0.06
   4   0  -2    0.15    0.05
   4   0  -2    0.10    0.07
  -4   0   2    0.12    0.09
  -4   0   2    0.05    0.06
  -4   0   2    0.03    0.09
   3   0  -2    3.41    0.19
   3   0  -2    3.31    0.18
   3   0  -2    3.24    0.24
  -3   0   2    3.27    0.20
  -3   0   2    3.38    0.19
  -3   0   2    3.54    0.18
  -3   0   2    3.20    0.20
   2   0  -2   58.49    1.83
   2   0  -2   56.87    1.79
  -2   0   2   57.80    1.83
  -2   0   2   54.77    1.80
  -2   0   2   56.61    1.80
  -2   0   2   57.44    1.82
   1   0  -2   39.80    1.27
  -1   0   2   38.66    1.27
  -1   0   2   41.12    1.29
  -1   0   2   41.18    1.31
  -1   0   2   40.85    1.28
   0   0  -2    0.08    0.03
   0   0  -2    0.13    0.05
   0   0   2    0.12    0.04
   0   0   2    0.16    0.04
   0   0   2    0.07    0.04
  -1   0  -2  212.86    6.43
   1   0   2  194.80    6.25
   1   0   2  204.53    6.34
  -2   0  -2   34.00    1.10
   2   0   2   34.27    1.14
   2   0   2   35.29    1.11
  -3   0  -2  105.11    3.29
  -3   0  -2  101.06    3.25
   3   0   2  100.32    3.29
   3   0   2  112.40    3.26
  -4   0  -2    3.85    0.18
  -4   0  -2    3.94    0.24
  -4   0  -2    3.68    0.21
   4   0   2    3.79    0.25
   4   0   2    3.76    0.21
  -5   0  -2   31.63    1.06
  -5   0  -2   32.27    1.15
   5   0   2   31.95    1.03
   5   0   2   32.20    1.11
   5   0   2   31.90    1.16
  -6   0  -2   37.67    1.23
  -6   0  -2   36.67    1.25
  -6   0  -2   37.00    1.32
  -6   0  -2   38.53    1.30
   6   0   2   37.32    1.34
   6   0   2   36.85    1.29
  -7   0  -2    9.81    0.47
  -7   0  -2    9.45    0.43
  -7   0  -2    9.57    0.41
  -7   0  -2    9.20    0.48
   7   0   2    9.62    0.46
  -8   0  -2    0.16    0.13
  -8   0  -2    0.10    0.13
  -8   0  -2   -0.01    0.12
  -8   0  -2    0.12    0.10
   8   0   2    0.06    0.18
   8   0   2    0.19    0.11
  -9   0  -2    0.04    0.15
  -9   0  -2    0.06    0.15
  -9   0  -2    0.00    0.16
  -9   0  -2   -0.14    0.11
   9   0   2    0.28    0.22
   9   0   2   -0.07    0.12
 -10   0  -2    1.00    0.24
 -10   0  -2    0.93    0.18
 -10   0  -2    0.93    0.25
  10   0   2    0.87    0.29
  10   0   2    0.85    0.21
 -11   0  -2    0.14    0.27
 -11   0  -2    0.00    0.23
  11   0   2   -0.08    0.19
  11   0   2    0.27    0.32
 -12   0  -2    0.78    0.29
  12   0   2    0.41    0.38
 -13   0  -2    0.23    0.38
  13   0   2    0.50    0.32
  12  -1  -2    1.76    0.40
 -11   1   2    0.76    0.34
  10  -1  -2    0.26    0.20
 -10   1   2    0.15    0.27
 -10   1   2    0.20    0.28
   9  -1  -2    3.41    0.38
  -9   1   2    3.42    0.33
  -9   1   2    4.02    0.46
  -9   1   2    3.85    0.42
  -9   1   2    4.00    0.33
   8  -1  -2    2.46    0.30
  -8   1   2    1.89    0.24
  -8   1   2    1.68    0.25
  -8   1   2    2.72    0.35
  -8   1   2    1.89    0.25
   7  -1  -2   14.86    0.66
  -7   1   2   14.94    0.62
  -7   1   2   14.89    0.59
  -7   1   2   15.34    0.69
  -7   1   2   15.87    0.70
   6  -1  -2    6.87    0.35
   6  -1  -2    6.80    0.38
  -6   1   2    6.83    0.40
  -6   1   2    6.79    0.33
  -6   1   2    6.60    0.36
  -6   1   2    7.47    0.40
   5  -1  -2    9.66    0.43
   5  -1  -2    9.51    0.37
   5  -1  -2   11.49    0.42
   5  -1  -2   11.42    0.49
  -5   1   2   11.35    0.47
  -5   1   2   11.55    0.50
  -5   1   2   11.45    0.51
  -5   1   2   11.55    0.44
   4  -1  -2    0.04    0.07
   4  -1  -2    0.09    0.08
   4  -1  -2   -0.17    0.06
  -4   1   2    0.05    0.09
  -4   1   2    0.16    0.08
  -4   1   2   -0.07    0.09
  -4   1   2    0.14    0.06
   3  -1  -2   34.67    1.07
   3  -1  -2   32.23    1.06
   3  -1  -2   32.97    1.10
  -3   1   2   34.55    1.12
  -3   1   2   34.64    1.08
  -3   1   2   29.89    1.10
  -3   1   2   32.24    1.12
   2  -1  -2   13.41    0.49
   2  -1  -2   12.95    0.48
   2  -1  -2   12.81    0.52
  -2   1   2   14.37    0.48
  -2   1   2   14.19    0.52
  -2   1   2   13.63    0.51
  -2   1   2   13.75    0.49
   1  -1  -2  100.94    3.19
   1  -1  -2  104.81    3.17
   1  -1  -2   99.46    3.16
  -1   1   2  105.32    3.16
  -1   1   2   99.65    3.16
  -1   1   2  104.89    3.19
  -1   1   2  102.59    3.18
   0  -1  -2   56.33    1.80
   0  -1  -2   59.94    1.83
   0  -1  -2   57.63    1.82
   0   1   2   57.47    1.82
   0   1   2   56.73    1.79
  -1  -1  -2   85.83    2.55
   1   1   2   80.34    2.52
   1   1   2   78.10    2.54
   1   1   2   81.80    2.51
  -2  -1  -2  192.75    6.10
  -2  -1  -2  206.34    6.03
  -2  -1  -2  195.98    6.06
   2   1   2  180.77    6.05
   2   1   2  205.26    6.01
   2   1   2  200.25    6.04
  -3  -1  -2   76.80    2.20
  -3  -1  -2   68.86    2.21
  -3  -1  -2   70.30    2.26
   3   1   2   62.71    2.24
   3   1   2   73.96    2.22
  -4  -1  -2    2.09    0.12
  -4  -1  -2    2.31    0.12
  -4  -1  -2    2.21    0.19
  -4  -1  -2    2.17    0.15
   4   1   2    2.31    0.19
   4   1   2    2.18    0.15
  -5  -1  -2  157.66    4.67
  -5  -1  -2  150.94    4.70
  -5  -1  -2  151.39    4.80
   5   1   2  153.08    4.80
   5   1   2  151.61    4.76
  -6  -1  -2    2.62    0.21
  -6  -1  -2    2.37    0.17
  -6  -1  -2    2.16    0.23
   6   1   2    2.22    0.19
   6   1   2    2.48    0.25
  -7  -1  -2   14.06    0.57
  -7  -1  -2   14.29    0.56
  -7  -1  -2   14.25    0.61
  -7  -1  -2   14.26    0.63
   7   1   2   14.43    0.61
  -8  -1  -2    1.15    0.17
  -8  -1  -2    0.81    0.15
  -8  -1  -2    1.40    0.22
  -8  -1  -2    1.35    0.19
   8   1   2    0.99    0.15
   8   1   2    1.17    0.23
  -9  -1  -2    5.75    0.43
  -9  -1  -2    5.40    0.36
  -9  -1  -2    5.39    0.40
   9   1   2    5.58    0.40
   9   1   2    5.54    0.45
 -10  -1  -2    0.16    0.19
 -10  -1  -2   -0.06    0.14
 -10  -1  -2    0.13    0.19
 -10  -1  -2    0.51    0.19
  10   1   2    0.08    0.21
  10   1   2    0.21    0.14
 -11  -1  -2    0.18    0.22
 -11  -1  -2   -0.11    0.24
 -11  -1  -2    0.41    0.20
  11   1   2    0.39    0.29
  11   1   2    0.52    0.19
 -12  -1  -2    0.68    0.26
 -12  -1  -2    0.90    0.29
  12   1   2    0.34    0.35
  12   1   2    0.29    0.24
 -13  -1  -2    0.14    0.33
  13   1   2    0.35    0.28
  12  -2  -2    1.08    0.37
 -12   2   2    1.62    0.43
  11  -2  -2    1.95    0.36
  10  -2  -2    1.19    0.24
 -10   2   2    1.35    0.33
   9  -2  -2    2.71    0.38
  -9   2   2    3.26    0.43
  -9   2   2    3.17    0.41
  -9   2   2    3.19    0.33
   8  -2  -2   25.20    1.01
   8  -2  -2   22.32    0.96
  -8   2   2   26.25    1.05
  -8   2   2   25.81    1.07
  -8   2   2   25.61    0.95
   7  -2  -2   13.97    0.64
   7  -2  -2   12.76    0.61
  -7   2   2   13.81    0.68
  -7   2   2   14.08    0.61
  -7   2   2   14.55    0.67
   6  -2  -2   10.83    0.50
   6  -2  -2    9.85    0.49
  -6   2   2   11.34    0.53
  -6   2   2   10.84    0.54
  -6   2   2   10.77    0.49
   5  -2  -2    3.12    0.24
   5  -2  -2    3.01    0.23
  -5   2   2    3.29    0.27
  -5   2   2    3.26    0.25
  -5   2   2    3.25    0.25
   4  -2  -2    0.11    0.06
   4  -2  -2    0.24    0.08
   4  -2  -2    0.28    0.08
  -4   2   2    0.16    0.10
  -4   2   2    0.12    0.06
  -4   2   2    0.19    0.11
   3  -2  -2    3.12    0.18
   3  -2  -2    2.81    0.16
  -3   2   2    3.22    0.20
  -3   2   2    3.34    0.22
  -3   2   2    3.15    0.20
  -3   2   2    2.85    0.20
   2  -2  -2    0.74    0.09
   2  -2  -2    0.69    0.08
  -2   2   2    0.59    0.09
  -2   2   2    0.88    0.11
  -2   2   2    0.66    0.10
  -2   2   2    0.77    0.09
   1  -2  -2   11.90    0.46
   1  -2  -2   11.40    0.41
   1  -2  -2   11.73    0.43
   1  -2  -2   10.97    0.45
  -1   2   2   12.26    0.45
  -1   2   2   11.63    0.44
  -1   2   2   11.68    0.41
  -1   2   2   11.68    0.45
   0  -2  -2    0.58    0.08
   0  -2  -2    0.63    0.06
   0  -2  -2    0.76    0.08
   0  -2  -2    0.79    0.11
   0   2   2    0.62    0.08
   0   2   2    0.64    0.08
   0   2   2    0.65    0.07
   0   2   2    0.61    0.08
  -1  -2  -2   59.74    1.89
  -1  -2  -2   58.72    1.87
  -1  -2  -2   60.60    1.88
  -1  -2  -2   57.17    1.88
   1   2   2   60.46    1.89
   1   2   2   59.11    1.86
   1   2   2   60.28    1.85
  -2  -2  -2    1.95    0.14
  -2  -2  -2    1.96    0.13
  -2  -2  -2    2.03    0.11
  -2  -2  -2    1.93    0.12
   2   2   2    1.72    0.14
   2   2   2    2.06    0.13
   2   2   2    1.98    0.11
   2   2   2    1.94    0.11
  -3  -2  -2  203.16    6.53
  -3  -2  -2  208.70    6.51
  -3  -2  -2  220.62    6.50
   3   2   2  211.74    6.45
   3   2   2  197.56    6.50
   3   2   2  223.82    6.47
  -4  -2  -2   15.12    0.60
  -4  -2  -2   17.46    0.59
  -4  -2  -2   17.59    0.67
   4   2   2   16.00    0.65
   4   2   2   17.53    0.62
   4   2   2   19.17    0.61
  -5  -2  -2    5.37    0.28
  -5  -2  -2    5.23    0.32
  -5  -2  -2    5.77    0.23
   5   2   2    5.59    0.32
   5   2   2    5.30    0.27
  -6  -2  -2   15.48    0.52
  -6  -2  -2   15.75    0.65
  -6  -2  -2   14.84    0.54
  -6  -2  -2   15.42    0.61
   6   2   2   14.77    0.60
   6   2   2   15.18    0.64
  -7  -2  -2   28.10    0.97
  -7  -2  -2   29.01    1.07
   7   2   2   28.22    1.09
   7   2   2   28.48    1.04
  -8  -2  -2    1.14    0.17
  -8  -2  -2    0.79    0.16
  -8  -2  -2    0.91    0.19
  -8  -2  -2    0.66    0.14
   8   2   2    0.79    0.15
   8   2   2    0.62    0.20
  -9  -2  -2    2.03    0.30
  -9  -2  -2    2.54    0.26
  -9  -2  -2    2.36    0.30
  -9  -2  -2    2.60    0.28
   9   2   2    2.19    0.27
   9   2   2    2.51    0.34
 -10  -2  -2    1.95    0.27
 -10  -2  -2    1.55    0.26
 -10  -2  -2    1.84    0.28
 -10  -2  -2    1.64    0.24
  10   2   2    1.74    0.28
  10   2   2    2.15    0.28
 -11  -2  -2    0.29    0.21
 -11  -2  -2    0.09    0.20
 -11  -2  -2   -0.30    0.22
  11   2   2    0.40    0.19
  11   2   2    0.47    0.24
 -12  -2  -2    1.18    0.30
 -12  -2  -2    1.14    0.29
 -12  -2  -2    1.29    0.28
  12   2   2    0.72    0.23
  12   2   2    1.41    0.34
 -13  -2  -2    0.49    0.34
 -13  -2  -2    1.54    0.34
  13   2   2    1.10    0.40
  13   2   2    1.67    0.35
 -14  -2  -2    0.57    0.41
  11  -3  -2    4.81    0.62
 -11   3   2    3.71    0.55
  10  -3  -2    0.54    0.26
 -10   3   2    0.82    0.33
   9  -3  -2    0.29    0.19
   9  -3  -2    0.29    0.24
  -9   3   2    0.75    0.27
  -9   3   2    0.29    0.27
   8  -3  -2   -0.13    0.21
  -8   3   2    0.02    0.22
  -8   3   2   -0.08    0.21
  -8   3   2    0.09    0.18
   7  -3  -2    9.26    0.50
  -7   3   2    9.99    0.50
  -7   3   2    8.93    0.55
  -7   3   2    8.81    0.53
   6  -3  -2    2.52    0.28
   6  -3  -2    2.33    0.25
  -6   3   2    2.35    0.25
  -6   3   2    2.63    0.29
  -6   3   2    2.04    0.27
   5  -3  -2    1.83    0.19
   5  -3  -2    1.90    0.23
  -5   3   2    1.82    0.23
  -5   3   2    2.14    0.27
  -5   3   2    1.96    0.22
   4  -3  -2    1.11    0.14
   4  -3  -2    1.13    0.17
   4  -3  -2    1.00    0.13
  -4   3   2    1.01    0.18
  -4   3   2    1.28    0.17
  -4   3   2    1.22    0.16
  -4   3   2    1.11    0.17
   3  -3  -2   62.26    2.01
   3  -3  -2   62.88    2.01
  -3   3   2   64.38    2.03
  -3   3   2   64.06    2.05
  -3   3   2   60.85    2.02
  -3   3   2   62.39    2.06
   2  -3  -2    1.83    0.14
   2  -3  -2    1.93    0.13
  -2   3   2    1.81    0.16
  -2   3   2    1.59    0.13
  -2   3   2    1.82    0.16
  -2   3   2    1.78    0.17
   1  -3  -2   15.23    0.57
   1  -3  -2   15.07    0.55
   1  -3  -2   14.30    0.51
  -1   3   2   14.29    0.51
  -1   3   2   15.12    0.56
  -1   3   2   14.94    0.56
   0  -3  -2    0.53    0.05
   0  -3  -2    0.41    0.07
   0   3   2    0.51    0.09
   0   3   2    0.61    0.08
   0   3   2    0.40    0.08
   0   3   2    0.40    0.08
  -1  -3  -2    2.94    0.18
  -1  -3  -2    3.16    0.19
  -1  -3  -2    3.16    0.18
   1   3   2    3.05    0.15
   1   3   2    3.09    0.17
   1   3   2    3.42    0.19
  -2  -3  -2  501.77   15.92
  -2  -3  -2  517.75   16.09
  -2  -3  -2  493.57   15.80
  -2  -3  -2  516.18   16.10
   2   3   2  551.45   16.30
   2   3   2  533.29   15.93
   2   3   2  529.22   15.85
   2   3   2  518.15   16.01
  -3  -3  -2  174.77    5.68
  -3  -3  -2  183.02    5.67
  -3  -3  -2  188.32    5.76
  -3  -3  -2  186.34    5.71
   3   3   2  191.83    5.68
   3   3   2  181.11    5.74
   3   3   2  191.02    5.72
   3   3   2  188.23    5.66
  -4  -3  -2    2.36    0.20
  -4  -3  -2    2.37    0.15
  -4  -3  -2    2.24    0.15
   4   3   2    2.28    0.14
   4   3   2    2.37    0.16
   4   3   2    2.19    0.19
  -5  -3  -2    3.36    0.18
  -5  -3  -2    3.19    0.20
  -5  -3  -2    2.80    0.24
   5   3   2    3.32    0.20
   5   3   2    3.05    0.24
   5   3   2    3.31    0.20
  -6  -3  -2    0.86    0.11
  -6  -3  -2    1.04    0.14
  -6  -3  -2    0.81    0.16
   6   3   2    0.91    0.13
   6   3   2    0.76    0.15
   6   3   2    0.99    0.13
  -7  -3  -2   13.42    0.58
  -7  -3  -2   13.68    0.63
  -7  -3  -2   13.83    0.58
   7   3   2   13.56    0.58
  -8  -3  -2   36.43    1.32
  -8  -3  -2   37.88    1.34
  -8  -3  -2   35.79    1.36
   8   3   2   36.73    1.35
   8   3   2   37.81    1.33
  -9  -3  -2   19.99    0.86
  -9  -3  -2   20.64    0.83
  -9  -3  -2   19.50    0.74
  -9  -3  -2   19.39    0.84
   9   3   2   18.61    0.84
   9   3   2   19.31    0.82
 -10  -3  -2    0.26    0.19
 -10  -3  -2   -0.31    0.18
 -10  -3  -2    0.15    0.18
 -10  -3  -2   -0.06    0.16
  10   3   2    0.12    0.15
  10   3   2   -0.11    0.19
 -11  -3  -2   -0.06    0.18
 -11  -3  -2   -0.08    0.20
 -11  -3  -2   -0.14    0.22
 -11  -3  -2    0.01    0.21
  11   3   2    0.18    0.16
 -12  -3  -2    0.14    0.23
 -12  -3  -2    0.31    0.27
 -12  -3  -2    0.04    0.25
  12   3   2    0.37    0.20
  12   3   2   -0.11    0.29
 -13  -3  -2   -0.04    0.29
 -13  -3  -2   -0.02    0.33
 -13  -3  -2    0.02    0.32
  13   3   2    0.30    0.34
  13   3   2   -0.59    0.26
  14   3   2    0.90    0.36
  11  -4  -2    2.46    0.43
 -11   4   2    1.63    0.42
  10  -4  -2    0.53    0.30
 -10   4   2   -0.18    0.34
   9  -4  -2    0.30    0.23
  -9   4   2   -0.16    0.30
  -9   4   2    0.09    0.27
   8  -4  -2    0.10    0.17
   8  -4  -2   -0.29    0.24
  -8   4   2    0.03    0.24
  -8   4   2    0.07    0.24
   7  -4  -2    1.31    0.20
   7  -4  -2    0.85    0.25
  -7   4   2    1.32    0.27
  -7   4   2    1.33    0.25
  -7   4   2    1.17    0.23
   6  -4  -2    2.18    0.32
   6  -4  -2    1.57    0.22
  -6   4   2    1.79    0.29
  -6   4   2    1.51    0.23
  -6   4   2    1.77    0.26
   5  -4  -2   12.36    0.53
  -5   4   2   12.20    0.55
  -5   4   2   11.68    0.54
  -5   4   2   12.37    0.55
  -5   4   2   11.49    0.58
   4  -4  -2    0.05    0.07
  -4   4   2   -0.06    0.09
  -4   4   2    0.10    0.10
  -4   4   2   -0.04    0.11
  -4   4   2    0.04    0.11
   3  -4  -2    0.36    0.08
   3  -4  -2    0.28    0.08
   3  -4  -2    0.22    0.11
  -3   4   2    0.22    0.11
  -3   4   2    0.15    0.10
  -3   4   2    0.35    0.11
  -3   4   2    0.27    0.08
   2  -4  -2   57.16    1.77
   2  -4  -2   54.04    1.69
   2  -4  -2   52.36    1.73
  -2   4   2   52.27    1.75
  -2   4   2   49.43    1.69
  -2   4   2   53.21    1.75
  -2   4   2   51.19    1.75
   1  -4  -2    4.37    0.25
   1  -4  -2    4.30    0.25
   1  -4  -2    4.36    0.19
  -1   4   2    4.54    0.24
  -1   4   2    4.25    0.20
  -1   4   2    4.30    0.25
  -1   4   2    4.06    0.25
   0  -4  -2    1.14    0.08
   0  -4  -2    1.36    0.14
   0  -4  -2    1.50    0.13
   0   4   2    1.54    0.14
   0   4   2    1.36    0.13
   0   4   2    1.27    0.12
   0   4   2    1.37    0.15
  -1  -4  -2    0.00    0.06
  -1  -4  -2    0.10    0.06
   1   4   2    0.14    0.07
   1   4   2    0.09    0.07
   1   4   2    0.11    0.06
   1   4   2    0.07    0.05
  -2  -4  -2   30.68    0.95
  -2  -4  -2   27.98    1.02
   2   4   2   30.42    1.05
   2   4   2   30.99    1.00
   2   4   2   30.49    0.97
   2   4   2   29.57    1.03
  -3  -4  -2    0.27    0.07
  -3  -4  -2    0.28    0.05
  -3  -4  -2    0.35    0.10
  -3  -4  -2    0.17    0.07
   3   4   2    0.24    0.08
   3   4   2    0.25    0.05
  -4  -4  -2   40.89    1.38
  -4  -4  -2   40.66    1.33
  -4  -4  -2   41.97    1.44
  -4  -4  -2   42.06    1.35
   4   4   2   42.60    1.39
   4   4   2   41.29    1.35
  -5  -4  -2   10.06    0.42
  -5  -4  -2   10.32    0.49
  -5  -4  -2    9.83    0.37
  -5  -4  -2    9.86    0.42
   5   4   2    9.41    0.42
   5   4   2    9.79    0.46
   5   4   2   10.40    0.42
  -6  -4  -2   27.73    0.98
  -6  -4  -2   28.52    1.06
  -6  -4  -2   27.31    0.95
   6   4   2   29.76    0.98
   6   4   2   24.92    1.02
   6   4   2   28.75    0.99
  -7  -4  -2   39.94    1.43
  -7  -4  -2   39.74    1.47
  -7  -4  -2   40.15    1.41
   7   4   2   40.84    1.41
   7   4   2   43.16    1.37
  -8  -4  -2   -0.08    0.10
  -8  -4  -2    0.13    0.12
  -8  -4  -2    0.03    0.15
   8   4   2    0.22    0.10
   8   4   2    0.13    0.13
  -9  -4  -2   32.63    1.22
  -9  -4  -2   31.92    1.24
  -9  -4  -2   32.80    1.23
   9   4   2   31.74    1.22
   9   4   2   31.92    1.20
 -10  -4  -2    5.08    0.43
 -10  -4  -2    4.74    0.41
 -10  -4  -2    5.48    0.44
  10   4   2    5.36    0.44
 -11  -4  -2    0.13    0.21
 -11  -4  -2    0.49    0.21
 -11  -4  -2    0.04    0.21
  11   4   2    0.38    0.23
  11   4   2    0.57    0.21
 -12  -4  -2    0.05    0.27
 -12  -4  -2    0.82    0.29
  12   4   2    0.86    0.23
  12   4   2    0.54    0.27
 -13  -4  -2    0.10    0.29
 -13  -4  -2   -0.09    0.31
  13   4   2    0.04    0.35
  13   4   2    0.08    0.24
  14   4   2    2.25    0.39
 -10   5   2    2.52    0.52
   9  -5  -2    0.40    0.37
   9  -5  -2    0.64    0.26
  -9   5   2    0.67    0.38
  -9   5   2    0.22    0.29
   8  -5  -2    0.86    0.37
   8  -5  -2    1.00    0.24
  -8   5   2    0.93    0.27
  -8   5   2    0.87    0.30
   7  -5  -2    3.98    0.45
   7  -5  -2    3.60    0.35
  -7   5   2    3.77    0.41
  -7   5   2    3.47    0.41
   6  -5  -2    1.98    0.30
   6  -5  -2    1.87    0.22
  -6   5   2    2.09    0.32
  -6   5   2    2.27    0.31
  -6   5   2    2.01    0.26
   5  -5  -2    0.64    0.20
   5  -5  -2    0.81    0.15
  -5   5   2    0.73    0.20
  -5   5   2    0.92    0.20
  -5   5   2    0.97    0.21
   4  -5  -2    7.95    0.39
  -4   5   2    8.48    0.44
  -4   5   2    8.38    0.40
  -4   5   2    8.41    0.46
  -4   5   2    7.67    0.44
   3  -5  -2    0.58    0.14
   3  -5  -2    0.58    0.10
  -3   5   2    0.67    0.14
  -3   5   2    0.62    0.14
  -3   5   2    0.55    0.13
  -3   5   2    0.50    0.10
   2  -5  -2    0.76    0.10
   2  -5  -2    0.78    0.15
  -2   5   2    0.72    0.14
  -2   5   2    0.83    0.16
  -2   5   2    0.79    0.14
  -2   5   2    0.81    0.10
   1  -5  -2   14.02    0.62
   1  -5  -2   15.54    0.52
   1  -5  -2   15.59    0.59
  -1   5   2   14.76    0.52
  -1   5   2   14.72    0.60
  -1   5   2   15.41    0.60
  -1   5   2   15.21    0.62
   0  -5  -2    4.97    0.30
   0  -5  -2    5.28    0.19
   0  -5  -2    5.16    0.27
   0   5   2    5.14    0.28
   0   5   2    5.16    0.26
   0   5   2    5.47    0.28
   0   5   2    4.92    0.30
  -1  -5  -2   72.03    2.31
   1   5   2   70.71    2.29
   1   5   2   73.80    2.30
   1   5   2   69.11    2.25
   1   5   2   70.41    2.31
  -2  -5  -2    8.44    0.40
  -2  -5  -2    8.49    0.29
   2   5   2    8.77    0.39
   2   5   2    8.63    0.34
   2   5   2    8.73    0.37
   2   5   2    8.42    0.40
  -3  -5  -2    7.93    0.38
  -3  -5  -2    8.71    0.41
  -3  -5  -2    7.97    0.30
   3   5   2    8.42    0.31
   3   5   2    8.29    0.31
   3   5   2    8.38    0.39
  -4  -5  -2  113.47    3.68
  -4  -5  -2  117.47    3.62
  -4  -5  -2  116.94    3.73
   4   5   2  120.25    3.62
   4   5   2  116.35    3.69
  -5  -5  -2    1.97    0.21
  -5  -5  -2    2.17    0.24
  -5  -5  -2    2.30    0.17
  -5  -5  -2    2.25    0.18
   5   5   2    2.33    0.16
   5   5   2    2.09    0.20
  -6  -5  -2    2.37    0.20
  -6  -5  -2    2.63    0.27
  -6  -5  -2    2.52    0.19
  -6  -5  -2    2.69    0.23
  -6  -5  -2    2.84    0.19
   6   5   2    2.49    0.21
   6   5   2    2.36    0.19
  -7  -5  -2   33.60    1.18
  -7  -5  -2   33.64    1.22
  -7  -5  -2   32.84    1.25
   7   5   2   32.35    1.17
   7   5   2   33.15    1.16
  -8  -5  -2   55.12    1.92
  -8  -5  -2   53.76    1.84
  -8  -5  -2   51.63    1.87
   8   5   2   54.53    1.84
   8   5   2   56.92    1.81
   8   5   2   52.27    1.86
  -9  -5  -2   -0.04    0.17
  -9  -5  -2    0.04    0.16
  -9  -5  -2    0.18    0.14
   9   5   2   -0.26    0.11
   9   5   2    0.02    0.16
   9   5   2    0.02    0.12
 -10  -5  -2    7.19    0.48
 -10  -5  -2    7.63    0.54
 -10  -5  -2    7.48    0.51
  10   5   2    7.28    0.46
 -11  -5  -2    2.53    0.34
 -11  -5  -2    2.11    0.33
 -11  -5  -2    2.34    0.35
  11   5   2    3.14    0.35
 -12  -5  -2    0.05    0.26
 -12  -5  -2    0.24    0.27
  12   5   2    0.30    0.19
 -13  -5  -2   -0.45    0.29
 -13  -5  -2   -0.06    0.33
  13   5   2   -0.17    0.24
 -14  -5  -2    2.04    0.49
 -14  -5  -2    2.10    0.42
  14   5   2    1.99    0.37
   9  -6  -2    1.26    0.34
   9  -6  -2   -0.86    0.50
  -9   6   2    1.17    0.36
   8  -6  -2    1.39    0.27
   8  -6  -2    0.84    0.40
   8  -6  -2    0.34    0.42
  -8   6   2    0.97    0.35
  -8   6   2    1.48    0.32
   7  -6  -2    2.13    0.39
   7  -6  -2    2.58    0.30
   7  -6  -2    2.14    0.38
  -7   6   2    2.53    0.36
  -7   6   2    2.28    0.38
   6  -6  -2    0.21    0.25
   6  -6  -2    0.29    0.24
   6  -6  -2    0.20    0.16
  -6   6   2    0.03    0.20
  -6   6   2   -0.07    0.19
  -6   6   2   -0.03    0.16
   5  -6  -2    6.11    0.36
   5  -6  -2    5.51    0.44
   5  -6  -2    5.07    0.45
  -5   6   2    5.59    0.41
  -5   6   2    4.85    0.38
  -5   6   2    5.31    0.41
   4  -6  -2    9.59    0.43
  -4   6   2    9.41    0.52
  -4   6   2    8.77    0.45
  -4   6   2    9.41    0.51
  -4   6   2    9.27    0.50
   3  -6  -2    2.62    0.27
   3  -6  -2    2.74    0.19
  -3   6   2    2.95    0.27
  -3   6   2    2.72    0.23
  -3   6   2    2.49    0.29
  -3   6   2    2.77    0.27
   2  -6  -2    0.20    0.07
   2  -6  -2    0.29    0.13
   2  -6  -2    0.35    0.07
  -2   6   2    0.35    0.14
  -2   6   2    0.26    0.12
  -2   6   2    0.39    0.08
  -2   6   2    0.47    0.13
   1  -6  -2    1.06    0.09
   1  -6  -2    1.01    0.16
   1  -6  -2    0.98    0.17
  -1   6   2    1.40    0.17
  -1   6   2    1.26    0.19
  -1   6   2    1.15    0.11
  -1   6   2    0.99    0.16
   0  -6  -2    9.23    0.45
   0  -6  -2    8.88    0.41
   0  -6  -2    8.70    0.31
   0   6   2    9.04    0.41
   0   6   2    9.78    0.42
   0   6   2    9.17    0.45
   0   6   2    9.09    0.43
  -1  -6  -2   24.94    0.94
   1   6   2   24.94    0.94
   1   6   2   24.14    0.87
   1   6   2   25.29    0.90
   1   6   2   24.74    0.91
  -2  -6  -2  111.62    3.52
   2   6   2  107.60    3.42
   2   6   2  112.00    3.49
   2   6   2  107.43    3.51
  -3  -6  -2   52.97    1.75
  -3  -6  -2   56.49    1.91
   3   6   2   58.38    1.91
   3   6   2   56.42    1.90
   3   6   2   58.03    1.79
  -4  -6  -2   25.24    0.86
  -4  -6  -2   25.88    0.99
  -4  -6  -2   26.08    0.96
   4   6   2   26.03    0.86
   4   6   2   25.84    0.96
  -5  -6  -2   46.32    1.60
  -5  -6  -2   42.75    1.50
  -5  -6  -2   46.96    1.60
  -5  -6  -2   46.12    1.63
   5   6   2   47.62    1.59
   5   6   2   48.06    1.51
  -6  -6  -2   12.47    0.57
  -6  -6  -2   12.41    0.60
   6   6   2   11.88    0.49
   6   6   2   11.72    0.54
  -7  -6  -2    1.03    0.17
  -7  -6  -2    0.91    0.14
  -7  -6  -2    0.81    0.16
  -7  -6  -2    0.89    0.21
   7   6   2    0.87    0.14
   7   6   2    0.96    0.17
  -8  -6  -2    2.68    0.25
  -8  -6  -2    2.67    0.33
  -8  -6  -2    1.81    0.27
   8   6   2    2.25    0.24
   8   6   2    2.34    0.23
  -9  -6  -2    5.77    0.38
  -9  -6  -2    5.16    0.41
  -9  -6  -2    4.92    0.45
   9   6   2    5.82    0.37
   9   6   2    5.26    0.37
 -10  -6  -2   13.50    0.68
 -10  -6  -2   13.86    0.74
 -10  -6  -2   13.44    0.73
  10   6   2   13.50    0.62
  10   6   2   13.94    0.66
 -11  -6  -2    0.02    0.23
 -11  -6  -2    0.34    0.26
 -11  -6  -2    0.03    0.20
  11   6   2    0.43    0.19
 -12  -6  -2    0.44    0.27
 -12  -6  -2    0.50    0.32
 -12  -6  -2    0.30    0.29
  12   6   2    1.01    0.23
 -13  -6  -2    1.33    0.35
 -13  -6  -2   -0.15    0.37
 -14  -6  -2   -0.44    0.36
  14   6   2    0.22    0.32
   9  -7  -2    0.21    0.35
  -9   7   2    0.64    0.40
   8  -7  -2    1.74    0.32
   8  -7  -2    2.10    0.52
   8  -7  -2    1.63    0.48
  -8   7   2    2.04    0.38
  -8   7   2    1.49    0.42
   7  -7  -2    0.92    0.40
   7  -7  -2    0.23    0.22
   7  -7  -2    1.02    0.35
  -7   7   2    0.26    0.27
  -7   7   2    0.48    0.29
   6  -7  -2    0.49    0.27
   6  -7  -2    0.24    0.17
   6  -7  -2    0.10    0.29
  -6   7   2   -0.10    0.24
  -6   7   2   -0.02    0.18
  -6   7   2    0.26    0.22
   5  -7  -2    0.19    0.14
   5  -7  -2   -0.02    0.20
   5  -7  -2   -0.16    0.22
  -5   7   2    0.18    0.18
  -5   7   2   -0.07    0.20
  -5   7   2    0.19    0.17
   4  -7  -2    2.99    0.25
  -4   7   2    2.66    0.32
  -4   7   2    2.40    0.34
  -4   7   2    2.80    0.29
   3  -7  -2   24.11    0.96
   3  -7  -2   26.39    0.90
  -3   7   2   25.69    0.92
  -3   7   2   25.57    1.02
  -3   7   2   25.47    1.03
   2  -7  -2   17.87    0.74
   2  -7  -2   18.63    0.67
   2  -7  -2   20.52    0.68
  -2   7   2   18.82    0.68
  -2   7   2   19.67    0.80
  -2   7   2   20.22    0.83
   1  -7  -2    0.94    0.14
   1  -7  -2    1.02    0.10
   1  -7  -2    1.15    0.17
  -1   7   2    1.29    0.23
  -1   7   2    0.96    0.16
   0  -7  -2   20.31    0.79
   0  -7  -2   20.36    0.81
   0   7   2   23.78    0.83
   0   7   2   23.34    0.84
   0   7   2   22.66    0.89
  -1  -7  -2    9.05    0.43
  -1  -7  -2   10.34    0.50
   1   7   2   10.51    0.46
   1   7   2    9.71    0.44
   1   7   2   10.26    0.51
  -2  -7  -2   -0.09    0.11
   2   7   2   -0.02    0.07
   2   7   2    0.03    0.11
   2   7   2    0.02    0.08
  -3  -7  -2    1.20    0.17
  -3  -7  -2    1.00    0.07
  -3  -7  -2    1.43    0.21
   3   7   2    1.10    0.14
   3   7   2    1.48    0.21
   3   7   2    1.41    0.18
  -4  -7  -2   51.99    1.87
  -4  -7  -2   61.37    2.03
  -4  -7  -2   63.43    2.02
   4   7   2   62.21    2.03
   4   7   2   59.96    1.87
  -5  -7  -2    2.62    0.18
  -5  -7  -2    2.78    0.28
  -5  -7  -2    2.74    0.26
   5   7   2    3.01    0.18
   5   7   2    2.97    0.26
  -6  -7  -2    3.80    0.34
  -6  -7  -2    3.62    0.32
   6   7   2    4.34    0.32
   6   7   2    4.21    0.24
  -7  -7  -2    6.60    0.35
  -7  -7  -2    6.46    0.46
  -7  -7  -2    6.68    0.43
   7   7   2    6.86    0.42
   7   7   2    6.80    0.35
  -8  -7  -2    0.81    0.22
  -8  -7  -2    0.74    0.16
  -8  -7  -2    0.69    0.21
   8   7   2    0.80    0.18
   8   7   2    0.96    0.16
  -9  -7  -2   10.56    0.65
  -9  -7  -2   11.10    0.56
  -9  -7  -2   11.07    0.66
   9   7   2   11.25    0.58
   9   7   2    9.87    0.55
 -10  -7  -2    6.56    0.56
 -10  -7  -2    6.73    0.54
 -10  -7  -2    7.11    0.48
  10   7   2    7.78    0.46
  10   7   2    7.98    0.47
 -11  -7  -2    0.90    0.24
 -11  -7  -2    0.65    0.27
 -11  -7  -2    0.70    0.30
  11   7   2    1.00    0.21
  11   7   2    0.83    0.23
 -12  -7  -2    2.87    0.43
 -12  -7  -2    2.00    0.33
 -12  -7  -2    2.47    0.40
  12   7   2    3.16    0.40
 -13  -7  -2   -0.31    0.34
 -13  -7  -2   -0.02    0.38
 -14  -7  -2    3.42    0.52
  14   7   2    2.80    0.41
   8  -8  -2    1.30    0.36
  -8   8   2    1.57    0.41
   7  -8  -2    0.31    0.45
   7  -8  -2    0.36    0.39
  -7   8   2    0.24    0.33
  -7   8   2    0.20    0.36
  -7   8   2    0.73    0.33
   6  -8  -2    0.98    0.38
   6  -8  -2    0.67    0.22
   6  -8  -2    0.60    0.30
  -6   8   2    1.22    0.28
  -6   8   2    0.48    0.30
  -6   8   2    0.79    0.27
   5  -8  -2    1.32    0.20
   5  -8  -2    0.43    0.25
   5  -8  -2    0.85    0.34
  -5   8   2    0.84    0.22
  -5   8   2    1.45    0.22
  -5   8   2    1.06    0.30
   4  -8  -2   10.95    0.49
  -4   8   2   10.21    0.60
  -4   8   2   10.83    0.65
  -4   8   2   11.18    0.53
   3  -8  -2    0.07    0.09
   3  -8  -2    0.11    0.15
  -3   8   2    0.23    0.20
  -3   8   2    0.06    0.15
  -3   8   2    0.05    0.12
   2  -8  -2    0.00    0.08
   2  -8  -2   -0.06    0.10
   2  -8  -2   -0.07    0.12
  -2   8   2    0.02    0.16
  -2   8   2    0.02    0.14
   1  -8  -2    2.81    0.15
   1  -8  -2    2.83    0.25
   1  -8  -2    2.59    0.24
  -1   8   2    3.23    0.34
  -1   8   2    2.43    0.26
   0  -8  -2    0.15    0.10
   0   8   2    0.20    0.14
   0   8   2   -0.05    0.11
   0   8   2    0.28    0.11
  -1  -8  -2    0.11    0.10
   1   8   2    0.07    0.11
   1   8   2    0.00    0.15
   1   8   2    0.13    0.10
  -2  -8  -2    0.18    0.11
   2   8   2    0.54    0.15
   2   8   2    0.41    0.12
   2   8   2    0.38    0.12
  -3  -8  -2    0.94    0.17
   3   8   2    1.06    0.18
   3   8   2    0.84    0.12
   3   8   2    1.11    0.21
  -4  -8  -2   11.96    0.44
   4   8   2   13.06    0.61
   4   8   2   12.59    0.60
  -5  -8  -2    4.90    0.36
  -5  -8  -2    4.49    0.35
  -5  -8  -2    4.39    0.23
   5   8   2    4.52    0.35
   5   8   2    4.53    0.23
  -6  -8  -2    7.35    0.33
  -6  -8  -2    7.06    0.45
  -6  -8  -2    6.38    0.45
   6   8   2    7.00    0.43
   6   8   2    7.03    0.33
  -7  -8  -2    1.90    0.26
  -7  -8  -2    1.42    0.25
  -7  -8  -2    1.86    0.20
   7   8   2    1.74    0.25
   7   8   2    1.72    0.19
  -8  -8  -2    2.24    0.34
  -8  -8  -2    1.95    0.25
  -8  -8  -2    1.23    0.25
   8   8   2    1.49    0.24
   8   8   2    2.18    0.23
  -9  -8  -2    0.10    0.14
  -9  -8  -2    0.06    0.22
  -9  -8  -2   -0.14    0.19
   9   8   2   -0.09    0.17
   9   8   2    0.10    0.13
 -10  -8  -2    3.95    0.39
 -10  -8  -2    3.78    0.49
 -10  -8  -2    3.35    0.47
  10   8   2    3.86    0.34
  10   8   2    4.27    0.39
 -11  -8  -2    2.67    0.40
 -11  -8  -2    2.79    0.41
 -11  -8  -2    3.06    0.37
  11   8   2    3.09    0.36
  11   8   2    2.66    0.34
 -12  -8  -2   -0.18    0.31
 -12  -8  -2    0.00    0.31
 -12  -8  -2   -0.54    0.30
  12   8   2    0.33    0.22
  12   8   2    0.41    0.25
 -13  -8  -2    3.18    0.52
  14   8   2    0.57    0.35
   7  -9  -2   -0.28    0.57
   7  -9  -2    0.41    0.30
  -7   9   2    0.34    0.46
  -7   9   2   -0.06    0.31
   6  -9  -2    1.05    0.50
   6  -9  -2   -0.09    0.22
  -6   9   2   -0.23    0.36
  -6   9   2    0.53    0.29
  -6   9   2   -0.13    0.28
   5  -9  -2    1.32    0.40
   5  -9  -2    1.01    0.21
  -5   9   2    0.74    0.34
  -5   9   2    0.76    0.25
  -5   9   2    1.47    0.33
   4  -9  -2    0.66    0.22
   4  -9  -2    0.83    0.16
  -4   9   2    0.75    0.28
  -4   9   2    0.29    0.20
  -4   9   2    0.47    0.20
   3  -9  -2    5.60    0.31
   3  -9  -2    5.14    0.38
  -3   9   2    5.28    0.50
  -3   9   2    6.33    0.46
   2  -9  -2    1.62    0.16
   2  -9  -2    1.45    0.21
   2  -9  -2    1.24    0.16
  -2   9   2    1.09    0.22
  -2   9   2    1.28    0.27
   1  -9  -2    0.77    0.16
  -1   9   2    0.40    0.23
  -1   9   2    0.69    0.18
   0  -9  -2    8.31    0.46
   0   9   2    8.84    0.55
   0   9   2    9.29    0.47
  -1  -9  -2    7.69    0.44
   1   9   2    7.68    0.43
   1   9   2    8.35    0.52
   1   9   2    7.81    0.42
  -2  -9  -2    0.22    0.13
   2   9   2    0.43    0.15
   2   9   2    0.05    0.17
   2   9   2    0.52    0.13
   3   9   2   28.11    1.03
   3   9   2   29.99    1.17
   3   9   2   29.36    1.11
  -4  -9  -2    9.82    0.53
   4   9   2   10.20    0.43
   4   9   2   10.30    0.56
   4   9   2   10.17    0.54
  -5  -9  -2   14.82    0.57
  -5  -9  -2   16.85    0.78
  -5  -9  -2   16.24    0.74
   5   9   2   16.70    0.76
   5   9   2   15.49    0.56
  -6  -9  -2    0.54    0.11
  -6  -9  -2    0.31    0.18
  -6  -9  -2    0.49    0.20
   6   9   2    0.40    0.19
   6   9   2    0.64    0.11
  -7  -9  -2    1.50    0.25
  -7  -9  -2    1.63    0.21
  -7  -9  -2    1.58    0.26
   7   9   2    1.80    0.20
   7   9   2    1.63    0.26
  -8  -9  -2   11.01    0.67
  -8  -9  -2   11.36    0.66
   8   9   2   10.91    0.51
   8   9   2    9.87    0.59
  -9  -9  -2   11.89    0.59
  -9  -9  -2   11.76    0.72
  -9  -9  -2   13.55    0.73
   9   9   2   11.68    0.56
   9   9   2   11.94    0.65
 -10  -9  -2    0.83    0.29
 -10  -9  -2    0.64    0.29
 -10  -9  -2    0.45    0.20
  10   9   2    0.72    0.19
  10   9   2    0.92    0.26
 -11  -9  -2    8.98    0.60
 -11  -9  -2    8.01    0.67
 -11  -9  -2    8.13    0.67
  11   9   2    7.51    0.56
  11   9   2    7.23    0.51
 -12  -9  -2    0.49    0.31
 -12  -9  -2    0.32    0.35
  12   9   2    0.09    0.23
  12   9   2    0.43    0.31
 -13  -9  -2    0.36    0.45
  13   9   2    1.70    0.33
 -14  -9  -2    0.69    0.50
  14   9   2    1.28    0.37
   6 -10  -2    0.46    0.28
  -6  10   2    0.14    0.46
  -6  10   2    0.79    0.37
   5 -10  -2    0.60    0.23
   5 -10  -2    0.85    0.53
  -5  10   2    0.56    0.41
  -5  10   2    0.41    0.28
   4 -10  -2    0.40    0.17
   4 -10  -2    0.28    0.21
  -4  10   2    0.68    0.28
  -4  10   2    0.45    0.33
  -3  10   2    0.50    0.20
  -2  10   2    3.96    0.38
  -2  10   2    4.03    0.51
  -1  10   2    0.00    0.24
  -1  10   2    0.11    0.15
   0 -10  -2    5.92    0.41
   0  10   2    6.57    0.51
   0  10   2    6.04    0.40
  -1 -10  -2    0.78    0.21
   1  10   2    1.19    0.21
   1  10   2    0.64    0.18
   1  10   2    0.60    0.26
  -2 -10  -2   35.41    1.38
   2  10   2   38.85    1.38
   2  10   2   37.79    1.48
   2  10   2   38.55    1.36
  -3 -10  -2   18.50    0.81
   3  10   2   17.69    0.85
   3  10   2   17.40    0.73
   3  10   2   18.99    0.80
  -4 -10  -2    1.57    0.26
   4  10   2    1.66    0.20
   4  10   2    1.76    0.29
   4  10   2    1.47    0.27
  -5 -10  -2    1.59    0.26
   5  10   2    1.54    0.28
   5  10   2    1.87    0.19
   5  10   2    1.80    0.30
  -6 -10  -2    2.00    0.31
  -6 -10  -2    1.77    0.20
  -6 -10  -2    2.35    0.37
   6  10   2    2.16    0.21
   6  10   2    1.48    0.20
   6  10   2    1.27    0.30
  -7 -10  -2    0.31    0.13
  -7 -10  -2    0.15    0.20
  -7 -10  -2    0.33    0.20
   7  10   2    0.47    0.13
   7  10   2    0.76    0.22
   7  10   2    0.58    0.12
  -8 -10  -2   -0.23    0.21
  -8 -10  -2   -0.04    0.21
  -8 -10  -2   -0.21    0.13
   8  10   2   -0.01    0.21
   8  10   2   -0.08    0.12
  -9 -10  -2    0.33    0.19
  -9 -10  -2    0.16    0.27
  -9 -10  -2   -0.03    0.27
   9  10   2    0.72    0.16
   9  10   2    0.75    0.25
 -10 -10  -2   -0.06    0.30
 -10 -10  -2   -0.25    0.20
  10  10   2    0.12    0.17
  10  10   2    0.06    0.23
 -11 -10  -2    1.49    0.39
 -11 -10  -2    1.54    0.30
  11  10   2    1.89    0.36
  11  10   2    1.49    0.28
 -12 -10  -2   -0.48    0.31
 -12 -10  -2   -0.22    0.39
  12  10   2    0.49    0.33
  12  10   2    0.31    0.24
 -13 -10  -2    0.57    0.45
  13  10   2    0.11    0.34
  13  10   2    0.49    0.28
 -14 -10  -2    0.35    0.54
  14  10   2    0.57    0.36
  -5  11   2   -0.50    0.47
  -5  11   2    0.09    0.30
  -4  11   2    9.70    0.69
  -4  11   2    8.14    0.81
  -3  11   2    0.98    0.37
  -3  11   2    1.10    0.32
  -2  11   2    0.16    0.33
   1 -11  -2    4.86    0.39
  -1  11   2    4.84    0.42
  -1  11   2    5.47    0.57
   0 -11  -2   -0.17    0.19
   0  11   2    0.06    0.26
   0  11   2   -0.15    0.18
  -1 -11  -2    0.64    0.22
   1  11   2    0.57    0.18
   1  11   2    0.85    0.17
   1  11   2    0.74    0.28
  -2 -11  -2    5.25    0.45
   2  11   2    5.68    0.41
   2  11   2    5.43    0.50
   2  11   2    4.81    0.37
  -3 -11  -2    3.35    0.41
   3  11   2    2.62    0.35
   3  11   2    3.06    0.41
   3  11   2    2.35    0.28
  -4 -11  -2    7.08    0.55
   4  11   2    7.80    0.52
   4  11   2    7.74    0.42
  -5 -11  -2    2.13    0.33
   5  11   2    2.74    0.37
   5  11   2    2.70    0.26
  -6 -11  -2    1.84    0.32
   6  11   2    2.71    0.26
   6  11   2    2.45    0.35
  -7 -11  -2    6.30    0.60
  -7 -11  -2    6.83    0.58
   7  11   2    6.24    0.32
   7  11   2    6.58    0.35
  -8 -11  -2    1.26    0.30
  -8 -11  -2    1.49    0.22
  -8 -11  -2    1.77    0.33
   8  11   2    1.44    0.20
  -9 -11  -2    0.36    0.27
  -9 -11  -2    0.18    0.31
  -9 -11  -2    0.08    0.19
   9  11   2    0.23    0.15
 -10 -11  -2    0.57    0.24
 -10 -11  -2    0.50    0.34
  10  11   2   -0.09    0.18
 -11 -11  -2    1.94    0.35
 -11 -11  -2    1.85    0.46
  11  11   2    2.05    0.29
 -12 -11  -2   -0.36    0.33
 -12 -11  -2   -0.04    0.41
  12  11   2   -0.01    0.26
 -13 -11  -2    0.30    0.51
  13  11   2   -0.07    0.31
  13  11   2   -0.25    0.40
  -4  12   2    0.40    0.27
  -4  12   2    0.72    0.51
  -3  12   2    0.27    0.25
  -3  12   2    0.15    0.45
  -2  12   2    7.86    0.76
  -2  12   2    9.20    0.65
   1 -12  -2    1.16    0.25
  -1  12   2    1.12    0.37
   0 -12  -2    1.28    0.27
   0  12   2    0.68    0.33
   0  12   2    1.25    0.28
  -1 -12  -2   -0.09    0.24
   1  12   2    0.26    0.19
   1  12   2    0.46    0.32
  -2 -12  -2    4.25    0.47
   2  12   2    2.67    0.37
   2  12   2    3.66    0.36
   2  12   2    4.60    0.54
  -3 -12  -2    0.94    0.28
   3  12   2    0.53    0.30
   3  12   2    0.94    0.21
   3  12   2    0.81    0.23
  -4 -12  -2    0.96    0.30
   4  12   2    1.10    0.20
   4  12   2    0.87    0.31
   4  12   2    1.36    0.28
  -5 -12  -2    1.07    0.31
   5  12   2    1.00    0.33
   5  12   2    1.21    0.20
   5  12   2    1.26    0.30
  -6 -12  -2    0.42    0.28
  -6 -12  -2    0.57    0.28
   6  12   2    0.06    0.26
   6  12   2    0.24    0.16
   6  12   2    0.20    0.24
  -7 -12  -2    2.74    0.45
  -7 -12  -2    2.79    0.46
   7  12   2    3.05    0.30
   7  12   2    2.68    0.40
   7  12   2    3.62    0.52
  -8 -12  -2    2.40    0.40
  -8 -12  -2    2.15    0.39
  -8 -12  -2    2.71    0.32
   8  12   2    3.46    0.48
   8  12   2    2.27    0.29
   8  12   2    2.72    0.26
  -9 -12  -2    6.62    0.70
  -9 -12  -2    5.86    0.47
   9  12   2    5.64    0.61
   9  12   2    5.98    0.40
 -10 -12  -2   -0.08    0.36
 -10 -12  -2    0.50    0.28
  10  12   2    0.31    0.20
  10  12   2    0.31    0.31
 -11 -12  -2   -0.38    0.32
 -11 -12  -2    0.18    0.41
  11  12   2    0.04    0.34
 -12 -12  -2    1.22    0.43
 -12 -12  -2    1.27    0.48
  12  12   2    1.68    0.33
  12  12   2    1.93    0.45
 -13 -12  -2    2.06    0.62
  13  12   2    1.66    0.41
  13  12   2    1.53    0.51
  -3  13   2    1.29    0.35
  -3  13   2    0.21    0.55
  -2  13   2    3.94    0.54
  -1  13   2    4.39    0.53
  -1  13   2    3.81    0.58
   0 -13  -2    0.79    0.31
   0  13   2    1.79    0.43
   0  13   2    1.53    0.36
  -1 -13  -2    1.95    0.38
   1  13   2    1.51    0.43
   1  13   2    1.86    0.31
  -2 -13  -2    4.20    0.58
   2  13   2    4.61    0.42
   2  13   2    4.64    0.67
   2  13   2    3.87    0.39
  -3 -13  -2    2.78    0.43
   3  13   2    3.41    0.37
   3  13   2    3.04    0.43
   3  13   2    4.57    0.58
  -4 -13  -2    3.13    0.43
   4  13   2    3.32    0.36
   4  13   2    3.31    0.41
   4  13   2    3.95    0.55
  -5 -13  -2    1.08    0.34
   5  13   2    1.26    0.36
   5  13   2    0.67    0.28
   5  13   2    1.06    0.21
  -6 -13  -2    2.70    0.46
  -6 -13  -2    2.39    0.43
   6  13   2    2.50    0.28
   6  13   2    2.31    0.39
   6  13   2    3.46    0.48
  -7 -13  -2    2.15    0.45
  -7 -13  -2    1.93    0.43
   7  13   2    1.55    0.39
   7  13   2    2.37    0.27
   7  13   2    1.84    0.40
  -8 -13  -2    1.32    0.47
   8  13   2    1.82    0.44
   8  13   2    1.78    0.24
   8  13   2    0.85    0.33
  -9 -13  -2   -0.31    0.40
  -9 -13  -2   -0.26    0.23
   9  13   2    0.22    0.34
   9  13   2    0.17    0.18
 -10 -13  -2    0.03    0.30
 -10 -13  -2    0.76    0.41
  10  13   2    0.12    0.39
  10  13   2    0.50    0.21
 -11 -13  -2    0.63    0.51
 -11 -13  -2    0.79    0.36
  11  13   2    0.36    0.42
  11  13   2   -0.04    0.25
 -12 -13  -2    8.27    0.89
  12  13   2    6.94    0.64
  12  13   2    7.27    0.86
  -1  14   2    0.31    0.54
  -1  14   2    1.05    0.34
   0  14   2    1.59    0.51
   0  14   2    2.19    0.39
  -1 -14  -2    0.49    0.38
   1  14   2    0.38    0.27
   1  14   2    0.73    0.43
  -2 -14  -2    3.60    0.52
   2  14   2    3.32    0.52
  -3 -14  -2    5.35    0.73
   3  14   2    6.96    0.51
   3  14   2    4.88    0.52
  -4 -14  -2    3.30    0.48
   4  14   2    3.80    0.42
   4  14   2    3.85    0.52
  -5 -14  -2    5.13    0.61
   5  14   2    5.98    0.59
   5  14   2    4.74    0.45
  -6 -14  -2    1.67    0.43
   6  14   2    1.79    0.52
   6  14   2    1.45    0.26
   6  14   2    1.95    0.38
   7  14   2    0.06    0.45
   7  14   2    0.26    0.36
   7  14   2    0.24    0.23
   8  14   2    2.55    0.48
   8  14   2    3.14    0.41
   9  14   2   -0.29    0.38
 -10 -14  -2    0.26    0.49
  10  14   2    0.65    0.24
 -11 -14  -2    1.35    0.55
  11  14   2    0.44    0.28
   1  15   2    2.50    0.43
   1  15   2    2.11    0.59
  -2 -15  -2    0.71    0.48
   2  15   2    0.61    0.35
   2  15   2    0.79    0.55
  -3 -15  -2   -0.10    0.47
   3  15   2    0.16    0.28
   3  15   2    0.32    0.50
  -4 -15  -2    0.17    0.52
   4  15   2    1.56    0.51
   4  15   2    1.71    0.38
   5  15   2    1.98    0.34
   5  15   2    1.65    0.42
   5  15   2    1.62    0.50
  -6 -15  -2    5.91    0.81
   6  15   2    5.52    0.50
   6  15   2    5.34    0.69
   6  15   2    4.15    0.62
  -7 -15  -2    0.67    0.53
   7  15   2   -0.48    0.42
   7  15   2   -0.20    0.27
   7  15   2   -0.32    0.39
  -8 -15  -2   -0.41    0.55
   8  15   2    0.20    0.44
   8  15   2   -0.25    0.29
   8  15   2    0.68    0.51
  -9 -15  -2   -0.51    0.50
   9  15   2    0.29    0.32
   9  15   2    0.37    0.45
   9  15   2    0.55    0.50
 -10 -15  -2    1.25    0.63
  10  15   2   -0.48    0.50
  10  15   2    0.38    0.50
   4  16   2    0.18    0.33
   5  16   2    0.17    0.32
   6  16   2    1.20    0.34
   7  16   2    0.12    0.33
   7  16   2    0.25    0.51
   8  16   2    2.53    0.59
   8  16   2    2.76    0.42
   8  15  -3    2.48    0.63
   7  15  -3    1.18    0.53
   6  15  -3    2.25    0.58
   6  15  -3    3.16    0.46
   5  15  -3    0.11    0.48
   4  15  -3    7.76    0.93
   3  15  -3   -0.52    0.49
   2  15  -3   -0.25    0.50
  -2 -15   3    0.25    0.61
   1  15  -3    1.48    0.33
   1  15  -3   -0.11    0.61
  10  14  -3    0.01    0.32
  10  14  -3   -0.05    0.48
   9  14  -3    0.11    0.46
   9  14  -3    0.24    0.24
   8  14  -3    0.33    0.45
   8  14  -3    0.57    0.21
   7  14  -3    1.20    0.18
   7  14  -3    2.31    0.52
   6  14  -3    1.08    0.44
   5  14  -3    0.17    0.39
   5  14  -3    0.29    0.29
   4  14  -3    3.22    0.45
   4  14  -3    3.36    0.49
   3  14  -3    1.17    0.23
   3  14  -3    0.68    0.41
  -3 -14   3    0.90    0.46
   2  14  -3    1.27    0.42
  -2 -14   3    0.79    0.47
   1  14  -3    0.44    0.44
  -1 -14   3    0.63    0.44
   0  14  -3   -0.16    0.45
   0  14  -3   -0.20    0.23
  -1  14  -3    0.14    0.28
  -1  14  -3    0.03    0.50
  11  13  -3    0.18    0.30
  11  13  -3    0.12    0.49
 -11 -13   3   -0.69    0.55
  10  13  -3    0.38    0.44
  10  13  -3   -0.05    0.25
 -10 -13   3   -0.22    0.48
   9  13  -3   -0.01    0.22
   9  13  -3   -0.46    0.38
  -9 -13   3   -0.20    0.39
   8  13  -3    0.02    0.17
   8  13  -3    0.52    0.37
  -8 -13   3    0.51    0.40
   7  13  -3    1.50    0.40
   7  13  -3    1.51    0.20
   6  13  -3    0.22    0.30
   6  13  -3    0.15    0.13
   5  13  -3    5.11    0.60
  -5 -13   3    3.55    0.52
   4  13  -3    0.28    0.23
   4  13  -3   -0.34    0.33
  -4 -13   3    0.03    0.35
   3  13  -3   -0.30    0.32
   3  13  -3   -0.16    0.19
  -3 -13   3   -0.29    0.33
   2  13  -3   -0.32    0.33
  -2 -13   3    0.37    0.34
   1  13  -3    0.58    0.36
  -1 -13   3    0.00    0.36
   0  13  -3    0.48    0.35
   0 -13   3    0.38    0.36
  -1  13  -3    0.11    0.24
   1 -13   3    1.01    0.36
  -2  13  -3    0.04    0.26
  -2  13  -3   -0.33    0.41
  -3  13  -3   -0.02    0.51
  -3  13  -3    0.36    0.26
  12  12  -3    1.56    0.50
  11  12  -3   -0.32    0.28
  11  12  -3   -0.22    0.40
 -11 -12   3    0.80    0.49
  10  12  -3    4.09    0.48
  10  12  -3    5.14    0.66
 -10 -12   3    6.81    0.79
   9  12  -3    0.17    0.20
   9  12  -3    0.59    0.34
  -9 -12   3    0.02    0.31
   8  12  -3    5.41    0.63
   8  12  -3    4.75    0.40
  -8 -12   3    6.14    0.65
   7  12  -3    2.73    0.30
   7  12  -3    2.88    0.46
   6  12  -3   -0.03    0.12
   6  12  -3    0.19    0.29
  -6 -12   3   -0.15    0.30
   5  12  -3    3.76    0.54
   5  12  -3    3.25    0.23
  -5 -12   3    3.72    0.54
   4  12  -3    0.23    0.29
  -4 -12   3   -0.01    0.27
   3  12  -3    9.37    0.70
   3  12  -3    8.68    0.49
  -3 -12   3    7.84    0.67
   2  12  -3    1.55    0.19
   2  12  -3    1.87    0.36
  -2 -12   3    1.50    0.35
   1  12  -3    0.13    0.31
  -1 -12   3   -0.04    0.27
   0  12  -3    2.88    0.47
   0 -12   3    4.41    0.55
  -1  12  -3    0.90    0.36
   1 -12   3    1.52    0.32
  -2  12  -3    0.57    0.39
  -2  12  -3    0.18    0.23
   2 -12   3    0.31    0.29
  -3  12  -3    0.50    0.37
  -3  12  -3    0.59    0.26
  -4  12  -3   -0.53    0.42
  -4  12  -3    0.38    0.24
  12  11  -3   -0.04    0.39
 -12 -11   3    0.10    0.47
  11  11  -3    4.71    0.53
  11  11  -3    4.43    0.63
 -11 -11   3    4.69    0.56
  10  11  -3    7.08    0.67
  10  11  -3    7.58    0.56
 -10 -11   3    8.72    0.73
   9  11  -3    6.75    0.63
   9  11  -3    7.45    0.50
  -9 -11   3    6.91    0.64
   8  11  -3    3.86    0.35
   8  11  -3    3.62    0.47
  -8 -11   3    3.44    0.49
  -8 -11   3    4.32    0.52
   7  11  -3    0.09    0.29
   7  11  -3    0.01    0.15
  -7 -11   3    0.31    0.28
   6  11  -3    1.68    0.34
   6  11  -3    1.89    0.24
  -6 -11   3    1.36    0.32
   5  11  -3    0.31    0.24
   5  11  -3    0.04    0.10
  -5 -11   3    0.00    0.23
   4  11  -3    1.22    0.13
   4  11  -3    1.92    0.33
  -4 -11   3    1.01    0.28
   3  11  -3    3.18    0.43
  -3 -11   3    2.06    0.35
   2  11  -3    0.92    0.28
   2  11  -3    1.32    0.19
  -2 -11   3    0.69    0.27
   1  11  -3    0.59    0.27
  -1 -11   3    0.67    0.25
   0  11  -3    0.87    0.33
   0 -11   3    0.93    0.26
  -1  11  -3    0.01    0.26
  -2  11  -3   -0.18    0.29
   2 -11   3   -0.48    0.38
   2 -11   3    0.25    0.23
  -3  11  -3    3.56    0.29
  -3  11  -3    3.71    0.48
  -3  11  -3    4.21    0.41
  -4  11  -3    1.73    0.23
  -4  11  -3    1.18    0.26
  -4  11  -3    1.81    0.41
  -5  11  -3    0.47    0.27
  -5  11  -3    0.63    0.43
  -6  11  -3    1.12    0.34
  -6  11  -3    1.73    0.53
  12  10  -3    1.03    0.36
 -12 -10   3    1.62    0.50
 -12 -10   3    1.10    0.44
  11  10  -3   -0.17    0.24
  11  10  -3   -0.43    0.29
 -11 -10   3   -0.47    0.36
 -11 -10   3   -0.75    0.40
  10  10  -3    9.86    0.59
  10  10  -3    7.81    0.64
 -10 -10   3    8.44    0.69
 -10 -10   3   10.85    0.73
   9  10  -3    1.40    0.31
   9  10  -3    1.96    0.26
  -9 -10   3    1.36    0.31
  -9 -10   3    1.24    0.35
  -9 -10   3    1.83    0.32
   8  10  -3    3.89    0.48
   8  10  -3    3.36    0.34
  -8 -10   3    3.68    0.53
  -8 -10   3    3.72    0.46
   7  10  -3    6.30    0.53
   7  10  -3    6.26    0.39
  -7 -10   3    5.63    0.56
   6  10  -3   33.88    1.18
   6  10  -3   33.67    1.34
  -6 -10   3   32.35    1.37
   5  10  -3    3.53    0.25
   5  10  -3    3.04    0.43
  -5 -10   3    3.30    0.43
   4  10  -3    8.43    0.37
   4  10  -3    7.61    0.59
  -4 -10   3    8.79    0.57
   3  10  -3    3.54    0.21
   3  10  -3    3.65    0.46
  -3 -10   3    4.07    0.42
   2  10  -3    2.03    0.36
   2  10  -3    2.17    0.14
   2  10  -3    1.65    0.23
   2  10  -3    1.49    0.14
  -2 -10   3    1.57    0.28
   1  10  -3   10.61    0.66
  -1 -10   3   10.59    0.61
   0  10  -3    0.54    0.25
  -1  10  -3    0.38    0.08
   1 -10   3    0.48    0.20
  -2  10  -3    4.70    0.25
  -2  10  -3    4.10    0.54
   2 -10   3    4.19    0.40
  -3  10  -3    3.78    0.50
  -3  10  -3    4.27    0.29
  -3  10  -3    4.46    0.37
   3 -10   3    3.48    0.37
   3 -10   3    3.85    0.50
  -4  10  -3    2.47    0.43
  -4  10  -3    2.37    0.31
   4 -10   3    2.09    0.45
  -5  10  -3    4.91    0.61
  -5  10  -3    5.78    0.44
  -5  10  -3    5.46    0.49
  -6  10  -3    0.30    0.36
  -6  10  -3    0.22    0.26
  -7  10  -3   -0.49    0.45
  -7  10  -3    0.34    0.27
  13   9  -3    0.30    0.34
  12   9  -3    0.26    0.30
 -12  -9   3    0.61    0.35
  11   9  -3    2.03    0.34
  11   9  -3    1.83    0.30
 -11  -9   3    2.05    0.37
 -11  -9   3    2.50    0.45
  10   9  -3    7.68    0.52
  10   9  -3    6.47    0.53
 -10  -9   3    7.08    0.60
 -10  -9   3    6.98    0.70
 -10  -9   3    6.77    0.60
   9   9  -3   10.88    0.59
   9   9  -3   10.78    0.63
  -9  -9   3   10.90    0.65
  -9  -9   3   10.82    0.75
  -9  -9   3   11.22    0.67
   8   9  -3    1.78    0.23
   8   9  -3    1.83    0.32
  -8  -9   3    1.20    0.26
  -8  -9   3    1.45    0.31
  -8  -9   3    1.55    0.26
   7   9  -3    1.24    0.27
   7   9  -3    1.03    0.18
  -7  -9   3    0.91    0.21
  -7  -9   3    1.07    0.27
   6   9  -3    0.45    0.14
   6   9  -3    0.13    0.27
  -6  -9   3    0.65    0.23
   5   9  -3    1.53    0.28
   5   9  -3    1.24    0.16
  -5  -9   3    0.94    0.23
   4   9  -3    7.99    0.52
   4   9  -3    7.53    0.35
  -4  -9   3    8.10    0.52
   3   9  -3    0.47    0.20
   3   9  -3    0.38    0.08
  -3  -9   3    0.25    0.16
   2   9  -3    0.89    0.23
   2   9  -3    0.60    0.08
  -2  -9   3    0.37    0.17
   1   9  -3    1.66    0.28
   1   9  -3    1.57    0.13
   1   9  -3    1.54    0.13
   1   9  -3    1.96    0.17
   0   9  -3    0.01    0.06
   0   9  -3    0.20    0.20
   0  -9   3    0.00    0.15
  -1   9  -3    5.42    0.55
  -1   9  -3    5.28    0.25
   1  -9   3    5.72    0.40
  -2   9  -3    9.70    0.40
  -2   9  -3   10.29    0.62
  -3   9  -3    4.54    0.48
   3  -9   3    4.32    0.57
   3  -9   3    4.51    0.34
  -4   9  -3    3.77    0.34
  -4   9  -3    4.05    0.47
  -4   9  -3    3.76    0.31
   4  -9   3    3.54    0.49
  -5   9  -3    0.20    0.26
  -5   9  -3    0.09    0.18
   5  -9   3    0.56    0.45
  -6   9  -3    1.99    0.30
  -6   9  -3    2.75    0.43
  -6   9  -3    2.16    0.38
  -7   9  -3    0.78    0.37
  -7   9  -3    0.83    0.30
  -7   9  -3    0.88    0.30
  -8   9  -3    0.82    0.30
  13   8  -3   -0.43    0.32
  12   8  -3    0.00    0.24
  11   8  -3   -0.18    0.21
  11   8  -3   -0.03    0.21
 -11  -8   3    0.18    0.28
 -11  -8   3   -0.21    0.33
  10   8  -3    3.66    0.41
  10   8  -3    3.43    0.40
 -10  -8   3    4.04    0.52
 -10  -8   3    3.41    0.45
 -10  -8   3    4.15    0.47
   9   8  -3    0.65    0.21
   9   8  -3    0.56    0.19
  -9  -8   3    0.83    0.31
  -9  -8   3    1.03    0.24
  -9  -8   3    0.90    0.25
   8   8  -3    2.51    0.36
   8   8  -3    2.95    0.31
  -8  -8   3    2.14    0.29
  -8  -8   3    2.83    0.36
  -8  -8   3    1.70    0.31
   7   8  -3    0.46    0.25
   7   8  -3    0.35    0.14
  -7  -8   3    0.14    0.17
  -7  -8   3    0.13    0.16
  -7  -8   3    0.55    0.22
   6   8  -3    0.19    0.11
   6   8  -3    0.10    0.15
  -6  -8   3    0.12    0.12
  -6  -8   3    0.18    0.18
   5   8  -3   -0.02    0.15
   5   8  -3   -0.12    0.12
   5   8  -3    0.06    0.09
  -5  -8   3    0.02    0.16
   4   8  -3   10.84    0.57
   4   8  -3   11.02    0.45
   4   8  -3   11.34    0.58
  -4  -8   3   11.09    0.59
   3   8  -3   28.91    0.98
   3   8  -3   29.33    1.13
  -3  -8   3   29.23    1.13
   2   8  -3   22.59    0.78
   2   8  -3   23.39    0.93
  -2  -8   3   23.90    0.96
   1   8  -3    0.07    0.06
   1   8  -3   -0.03    0.14
   1   8  -3    0.00    0.11
  -1  -8   3   -0.05    0.11
   0   8  -3   -0.12    0.11
   0   8  -3   -0.10    0.14
   0   8  -3    0.02    0.06
   0  -8   3    0.06    0.12
  -1   8  -3   16.97    0.62
  -1   8  -3   19.00    0.82
  -2   8  -3   10.16    0.58
  -2   8  -3   10.12    0.41
   2  -8   3   10.60    0.49
  -3   8  -3   10.56    0.61
   3  -8   3   10.59    0.68
   3  -8   3    9.20    0.46
  -4   8  -3   -0.13    0.13
  -4   8  -3   -0.01    0.12
  -4   8  -3   -0.02    0.19
   4  -8   3    0.09    0.26
  -5   8  -3   15.29    0.68
  -5   8  -3   15.26    0.78
  -5   8  -3   15.42    0.73
   5  -8   3   15.52    0.94
  -6   8  -3    3.04    0.35
  -6   8  -3    2.81    0.38
  -6   8  -3    2.64    0.38
   6  -8   3    3.42    0.56
  -7   8  -3    0.84    0.27
  -7   8  -3    0.86    0.27
  -7   8  -3    0.58    0.29
   7  -8   3    0.96    0.49
  -8   8  -3    0.08    0.32
  -8   8  -3    0.55    0.29
  -8   8  -3    0.33    0.33
  -9   8  -3    0.67    0.34
  13   7  -3   -0.79    0.31
  12   7  -3   -0.30    0.19
  12   7  -3   -0.56    0.25
  11   7  -3   -0.22    0.20
  11   7  -3    0.02    0.18
 -11  -7   3   -0.68    0.33
  10   7  -3   -0.02    0.17
  10   7  -3   -0.14    0.16
 -10  -7   3    0.05    0.30
 -10  -7   3    0.06    0.20
 -10  -7   3   -0.20    0.27
 -10  -7   3    0.43    0.26
   9   7  -3    2.36    0.28
   9   7  -3    2.28    0.31
  -9  -7   3    3.50    0.40
  -9  -7   3    2.62    0.32
  -9  -7   3    1.63    0.31
   8   7  -3    4.75    0.37
   8   7  -3    4.89    0.38
  -8  -7   3    4.58    0.38
  -8  -7   3    5.13    0.39
  -8  -7   3    4.15    0.45
   7   7  -3    1.51    0.25
   7   7  -3    1.18    0.17
  -7  -7   3    1.25    0.20
  -7  -7   3    1.34    0.23
  -7  -7   3    1.51    0.26
   6   7  -3    0.01    0.13
   6   7  -3    0.16    0.15
   6   7  -3    0.27    0.11
  -6  -7   3    0.42    0.16
  -6  -7   3    0.18    0.13
   5   7  -3    3.30    0.24
   5   7  -3    3.80    0.35
  -5  -7   3    3.63    0.36
   4   7  -3    0.37    0.14
   4   7  -3    0.33    0.09
  -4  -7   3    0.40    0.14
   3   7  -3    0.07    0.11
   3   7  -3    0.07    0.06
  -3  -7   3   -0.03    0.10
   2   7  -3    0.96    0.16
   2   7  -3    1.21    0.13
  -2  -7   3    0.91    0.17
   1   7  -3    1.64    0.21
   1   7  -3    1.77    0.13
  -1  -7   3    1.45    0.22
   0   7  -3   23.33    0.86
   0   7  -3   22.34    0.76
  -1   7  -3    0.74    0.10
  -1   7  -3    0.90    0.15
   1  -7   3    0.96    0.15
  -2   7  -3   17.32    0.75
  -2   7  -3   17.05    0.60
   2  -7   3   15.59    0.64
  -3   7  -3    0.55    0.18
   3  -7   3    0.13    0.11
   3  -7   3   -0.15    0.19
  -4   7  -3    9.31    0.61
  -4   7  -3   10.20    0.46
   4  -7   3    9.90    0.67
  -5   7  -3    0.16    0.15
  -5   7  -3   -0.11    0.18
   5  -7   3    0.09    0.29
  -6   7  -3    4.50    0.42
  -6   7  -3    3.83    0.36
  -6   7  -3    4.04    0.37
   6  -7   3    4.93    0.63
  -7   7  -3    6.09    0.49
  -7   7  -3    5.08    0.48
  -7   7  -3    5.65    0.45
   7  -7   3    5.87    0.47
   7  -7   3    6.28    0.72
  -8   7  -3    1.58    0.33
  -8   7  -3    1.77    0.33
  -8   7  -3    1.41    0.30
   8  -7   3    1.61    0.26
   8  -7   3    1.66    0.54
   8  -7   3    1.38    0.30
  -9   7  -3    0.95    0.37
  -9   7  -3    0.87    0.34
   9  -7   3    0.42    0.31
  13   6  -3    1.09    0.35
  12   6  -3   -0.18    0.24
 -12  -6   3    0.20    0.41
  11   6  -3    1.53    0.29
  11   6  -3    1.60    0.20
 -11  -6   3    1.70    0.38
  10   6  -3   -0.20    0.18
  10   6  -3    0.13    0.15
 -10  -6   3    0.14    0.27
 -10  -6   3    0.19    0.24
 -10  -6   3    0.41    0.26
   9   6  -3   -0.07    0.14
  -9  -6   3   -0.33    0.21
  -9  -6   3    0.27    0.23
  -9  -6   3    0.03    0.19
   8   6  -3    4.68    0.38
   8   6  -3    5.00    0.38
  -8  -6   3    4.82    0.46
  -8  -6   3    4.81    0.41
  -8  -6   3    4.86    0.37
   7   6  -3    3.75    0.32
   7   6  -3    3.27    0.29
  -7  -6   3    3.68    0.31
  -7  -6   3    3.61    0.36
  -7  -6   3    4.36    0.33
   6   6  -3   17.33    0.69
   6   6  -3   16.84    0.77
  -6  -6   3   17.12    0.69
  -6  -6   3   16.88    0.70
  -6  -6   3   16.91    0.76
   5   6  -3    0.55    0.11
   5   6  -3    0.33    0.12
  -5  -6   3    0.32    0.15
  -5  -6   3    0.19    0.11
   4   6  -3   35.12    1.29
   4   6  -3   35.57    1.20
  -4  -6   3   35.91    1.30
   3   6  -3    0.23    0.07
   3   6  -3    0.16    0.11
  -3  -6   3    0.14    0.10
   2   6  -3   56.16    1.75
   2   6  -3   53.87    1.85
  -2  -6   3   54.70    1.86
   1   6  -3    7.19    0.37
   0   6  -3    4.17    0.26
   0  -6   3    3.92    0.26
  -1   6  -3   37.27    1.28
  -1   6  -3   37.90    1.23
   1  -6   3   38.94    1.30
  -2   6  -3    8.65    0.35
  -2   6  -3    8.49    0.37
   2  -6   3    8.13    0.39
  -3   6  -3   27.62    0.90
  -3   6  -3   26.30    1.01
  -3   6  -3   26.65    0.93
   3  -6   3   27.65    1.10
   3  -6   3   24.79    0.91
  -4   6  -3    0.97    0.14
  -4   6  -3    1.17    0.22
   4  -6   3    0.84    0.28
  -5   6  -3   43.38    1.51
  -5   6  -3   43.63    1.57
  -5   6  -3   43.29    1.56
   5  -6   3   45.16    1.53
   5  -6   3   45.15    1.71
  -6   6  -3    0.70    0.18
  -6   6  -3    0.70    0.20
  -6   6  -3    0.65    0.16
   6  -6   3    0.73    0.29
   6  -6   3    0.77    0.18
  -7   6  -3    0.15    0.16
  -7   6  -3    0.14    0.19
  -7   6  -3    0.48    0.19
   7  -6   3    0.44    0.20
   7  -6   3    0.14    0.30
  -8   6  -3    0.65    0.27
  -8   6  -3    0.71    0.22
  -8   6  -3    0.73    0.23
   8  -6   3    0.80    0.25
   8  -6   3    1.17    0.42
  -9   6  -3   -0.07    0.23
  -9   6  -3    0.14    0.31
  -9   6  -3    0.71    0.27
   9  -6   3    0.32    0.27
   9  -6   3   -0.42    0.48
 -10   6  -3    0.52    0.30
  10  -6   3    0.97    0.37
 -13  -5   3    3.51    0.62
  12   5  -3    0.00    0.22
 -12  -5   3    0.71    0.42
  11   5  -3    1.23    0.26
 -11  -5   3    1.57    0.38
  10   5  -3    0.89    0.14
  10   5  -3    0.59    0.18
 -10  -5   3    0.81    0.28
 -10  -5   3    0.57    0.25
   9   5  -3   10.45    0.48
  -9  -5   3   11.15    0.66
  -9  -5   3   11.56    0.65
  -9  -5   3   12.13    0.60
   8   5  -3    3.39    0.32
   8   5  -3    4.00    0.28
  -8  -5   3    3.59    0.36
  -8  -5   3    3.53    0.36
  -8  -5   3    2.99    0.36
   7   5  -3    1.94    0.27
   7   5  -3    1.88    0.24
  -7  -5   3    2.10    0.29
  -7  -5   3    2.17    0.24
  -7  -5   3    2.53    0.27
   6   5  -3    5.46    0.33
   6   5  -3    5.39    0.38
  -6  -5   3    5.27    0.32
  -6  -5   3    5.58    0.35
  -6  -5   3    5.14    0.37
   5   5  -3   12.52    0.53
   5   5  -3   12.93    0.59
  -5  -5   3   12.86    0.60
  -5  -5   3   12.57    0.54
   4   5  -3    2.42    0.18
   4   5  -3    2.10    0.23
  -4  -5   3    2.17    0.23
   3   5  -3   11.13    0.44
   3   5  -3   11.20    0.54
  -3  -5   3   10.96    0.51
   2   5  -3    7.57    0.32
   2   5  -3    8.01    0.40
   1   5  -3   55.48    1.84
  -1  -5   3   55.99    1.85
   0   5  -3   56.00    1.83
   0  -5   3   55.38    1.83
  -1   5  -3   10.60    0.43
  -1   5  -3   10.36    0.39
   1  -5   3   10.03    0.43
  -2   5  -3   11.20    0.44
  -2   5  -3   11.55    0.45
   2  -5   3   11.21    0.46
   2  -5   3   12.41    0.57
  -3   5  -3    5.39    0.27
  -3   5  -3    5.67    0.25
   3  -5   3    5.59    0.39
   3  -5   3    4.42    0.26
  -4   5  -3   22.52    0.83
   4  -5   3   22.62    0.97
   4  -5   3   23.45    0.85
  -5   5  -3    0.15    0.11
  -5   5  -3    0.17    0.13
  -5   5  -3   -0.04    0.10
   5  -5   3    0.23    0.13
   5  -5   3    0.17    0.19
  -6   5  -3   11.46    0.56
  -6   5  -3   10.48    0.56
  -6   5  -3   11.90    0.55
   6  -5   3   12.17    0.72
   6  -5   3   11.28    0.56
  -7   5  -3    1.83    0.24
  -7   5  -3    2.60    0.28
  -7   5  -3    2.20    0.29
   7  -5   3    1.90    0.36
   7  -5   3    2.63    0.31
  -8   5  -3    0.23    0.17
  -8   5  -3    0.26    0.22
  -8   5  -3    0.25    0.18
   8  -5   3    0.50    0.20
   8  -5   3    0.27    0.35
  -9   5  -3    0.28    0.21
  -9   5  -3    0.21    0.18
  -9   5  -3    0.32    0.27
   9  -5   3   -0.41    0.38
   9  -5   3    0.79    0.25
 -10   5  -3    1.00    0.30
  10  -5   3    0.76    0.55
  10  -5   3    1.84    0.35
 -11   5  -3    2.83    0.45
  11  -5   3    2.00    0.44
  13   4  -3    0.53    0.32
 -12  -4   3    2.04    0.41
 -12  -4   3    1.91    0.45
  11   4  -3    1.38    0.26
 -11  -4   3    1.65    0.37
 -11  -4   3    1.54    0.35
  10   4  -3   16.56    0.79
 -10  -4   3   16.96    0.84
 -10  -4   3   16.58    0.80
 -10  -4   3   16.46    0.84
   9   4  -3    1.18    0.22
   9   4  -3    1.39    0.15
  -9  -4   3    1.38    0.30
  -9  -4   3    1.88    0.28
  -9  -4   3    1.81    0.28
  -9  -4   3    1.94    0.33
   8   4  -3   -0.05    0.11
   8   4  -3    0.13    0.11
  -8  -4   3    0.11    0.16
  -8  -4   3   -0.08    0.16
  -8  -4   3    0.11    0.18
  -8  -4   3    0.02    0.19
   7   4  -3   11.10    0.53
   7   4  -3   11.12    0.55
  -7  -4   3   11.43    0.55
  -7  -4   3   10.77    0.54
  -7  -4   3   10.84    0.57
   6   4  -3    0.16    0.08
   6   4  -3    0.02    0.09
  -6  -4   3    0.17    0.09
  -6  -4   3    0.08    0.10
   5   4  -3    5.62    0.30
   5   4  -3    5.38    0.34
  -5  -4   3    5.29    0.28
  -5  -4   3    5.51    0.32
  -5  -4   3    5.33    0.34
   4   4  -3    0.70    0.16
   4   4  -3    0.60    0.11
  -4  -4   3    0.57    0.13
   3   4  -3   39.78    1.32
  -3  -4   3   39.93    1.32
   2   4  -3    2.85    0.21
   2   4  -3    2.81    0.17
  -2  -4   3    2.92    0.21
   1   4  -3   41.18    1.40
  -1  -4   3   42.46    1.41
   0   4  -3   25.27    0.88
   0  -4   3   25.36    0.89
  -1   4  -3    0.38    0.08
  -1   4  -3    0.39    0.07
   1  -4   3    0.55    0.10
  -2   4  -3    1.87    0.20
   2  -4   3    1.99    0.17
  -3   4  -3   56.88    1.78
  -3   4  -3   55.01    1.82
   3  -4   3   59.06    1.95
   3  -4   3   55.22    1.80
   4  -4   3    1.95    0.18
   4  -4   3    1.83    0.26
  -5   4  -3    0.56    0.12
   5  -4   3    0.34    0.11
  -6   4  -3    0.07    0.13
  -6   4  -3    0.07    0.11
  -6   4  -3   -0.02    0.11
   6  -4   3   -0.09    0.11
   6  -4   3    0.08    0.17
  -7   4  -3    7.90    0.47
  -7   4  -3    7.92    0.46
  -7   4  -3    8.03    0.40
   7  -4   3    8.68    0.61
   7  -4   3    8.15    0.46
  -8   4  -3    0.66    0.15
  -8   4  -3    0.61    0.18
  -8   4  -3    0.42    0.21
   8  -4   3    0.32    0.27
   8  -4   3    0.61    0.17
  -9   4  -3   -0.02    0.20
  -9   4  -3   -0.09    0.24
  -9   4  -3    0.05    0.13
   9  -4   3    0.36    0.34
   9  -4   3    0.18    0.20
 -10   4  -3    2.74    0.39
 -10   4  -3    1.98    0.39
  10  -4   3    1.89    0.51
  10  -4   3    2.65    0.35
 -11   4  -3    1.88    0.36
  11  -4   3    1.14    0.52
 -13  -3   3    2.72    0.48
  12   3  -3   -0.54    0.23
 -12  -3   3   -0.38    0.30
 -12  -3   3    0.05    0.40
 -11  -3   3    3.27    0.44
 -11  -3   3    3.13    0.42
  10   3  -3   19.79    0.86
 -10  -3   3   18.73    0.89
 -10  -3   3   17.94    0.86
 -10  -3   3   17.15    0.89
   9   3  -3    4.08    0.36
  -9  -3   3    4.00    0.39
  -9  -3   3    3.99    0.41
  -9  -3   3    3.41    0.39
  -9  -3   3    3.43    0.33
   8   3  -3   22.75    0.80
   8   3  -3   25.15    0.98
  -8  -3   3   24.11    0.98
  -8  -3   3   23.40    0.98
  -8  -3   3   23.51    0.96
  -8  -3   3   24.14    0.92
   7   3  -3    1.15    0.18
   7   3  -3    1.08    0.20
  -7  -3   3    0.90    0.19
  -7  -3   3    0.90    0.19
  -7  -3   3    0.69    0.17
  -7  -3   3    0.93    0.21
   6   3  -3    6.93    0.37
   6   3  -3    6.39    0.38
  -6  -3   3    6.41    0.38
  -6  -3   3    6.99    0.40
  -6  -3   3    6.07    0.37
   5   3  -3   -0.01    0.06
   5   3  -3    0.01    0.08
  -5  -3   3    0.07    0.08
  -5  -3   3   -0.02    0.08
  -5  -3   3    0.09    0.13
   4   3  -3   13.39    0.57
   4   3  -3   12.88    0.53
   3   3  -3    0.30    0.08
   3   3  -3    0.34    0.07
  -3  -3   3    0.35    0.08
  -3  -3   3    0.27    0.09
   2   3  -3   57.62    1.82
   2   3  -3   57.61    1.86
  -2  -3   3   55.63    1.86
   1   3  -3  174.58    5.25
  -1  -3   3  164.69    5.25
   0   3  -3   28.94    0.93
   0  -3   3   25.63    0.93
  -1   3  -3    1.63    0.09
  -1   3  -3    1.61    0.13
   1  -3   3    1.61    0.17
   1  -3   3    1.78    0.14
  -2   3  -3   15.83    0.56
  -2   3  -3   14.17    0.55
   2  -3   3   14.81    0.56
   2  -3   3   16.43    0.65
   2  -3   3   16.98    0.52
  -3   3  -3    2.13    0.19
  -3   3  -3    2.70    0.16
   3  -3   3    2.46    0.19
   3  -3   3    2.58    0.17
   4  -3   3    0.31    0.13
   4  -3   3    0.42    0.09
  -5   3  -3    0.56    0.11
   5  -3   3    0.77    0.15
   5  -3   3    0.79    0.14
  -6   3  -3   11.08    0.49
  -6   3  -3   10.42    0.45
   6  -3   3    9.94    0.59
   6  -3   3   11.13    0.51
  -7   3  -3    7.77    0.42
  -7   3  -3    7.01    0.34
  -7   3  -3    6.95    0.41
   7  -3   3    7.49    0.54
   7  -3   3    7.60    0.43
  -8   3  -3    5.71    0.29
  -8   3  -3    5.68    0.40
  -8   3  -3    5.05    0.40
   8  -3   3    6.30    0.42
   8  -3   3    6.03    0.55
  -9   3  -3    3.91    0.44
  -9   3  -3    3.97    0.38
   9  -3   3    4.08    0.56
   9  -3   3    4.82    0.42
 -10   3  -3    0.16    0.21
 -10   3  -3   -0.22    0.26
  10  -3   3   -0.15    0.34
  10  -3   3    0.26    0.23
 -11   3  -3    0.59    0.27
  11  -3   3    0.28    0.47
  11  -3   3    0.17    0.28
 -12   3  -3    0.16    0.33
  12  -3   3    0.40    0.35
 -13  -2   3    0.39    0.40
  12   2  -3   -0.32    0.25
 -12  -2   3    0.24    0.34
  11   2  -3    0.26    0.22
 -11  -2   3    1.06    0.31
 -11  -2   3    0.72    0.29
  10   2  -3    0.81    0.23
 -10  -2   3    1.23    0.29
 -10  -2   3    0.64    0.25
 -10  -2   3    0.26    0.24
 -10  -2   3    0.66    0.21
   9   2  -3    9.40    0.54
  -9  -2   3    9.80    0.58
  -9  -2   3    8.95    0.58
  -9  -2   3    9.74    0.49
  -9  -2   3    9.55    0.57
   8   2  -3   42.31    1.51
  -8  -2   3   42.21    1.44
  -8  -2   3   41.02    1.48
  -8  -2   3   40.47    1.51
  -8  -2   3   40.39    1.50
   7   2  -3   39.64    1.42
   7   2  -3   40.65    1.40
  -7  -2   3   40.23    1.44
  -7  -2   3   38.27    1.41
  -7  -2   3   39.08    1.42
  -7  -2   3   40.60    1.39
   6   2  -3   32.42    1.18
   6   2  -3   34.43    1.19
  -6  -2   3   32.97    1.19
  -6  -2   3   32.27    1.19
  -6  -2   3   33.57    1.21
  -6  -2   3   33.62    1.21
   5   2  -3   32.41    1.15
   5   2  -3   31.98    1.14
  -5  -2   3   33.26    1.16
  -5  -2   3   32.76    1.16
  -5  -2   3   32.19    1.15
   4   2  -3    9.73    0.42
   4   2  -3    9.31    0.42
  -4  -2   3    9.41    0.43
  -4  -2   3    9.02    0.43
   3   2  -3    0.51    0.10
   3   2  -3    0.29    0.07
  -3  -2   3    0.30    0.07
  -3  -2   3    0.48    0.10
  -3  -2   3    0.49    0.11
   2   2  -3   49.58    1.65
   2   2  -3   51.86    1.63
   1   2  -3    3.28    0.19
  -1  -2   3    3.03    0.19
   0   2  -3  291.93    8.78
   0  -2   3  272.37    8.63
   0  -2   3  282.25    8.64
  -1   2  -3    1.06    0.10
  -1   2  -3    1.18    0.08
   1  -2   3    1.07    0.08
   1  -2   3    0.88    0.12
   1  -2   3    0.86    0.10
  -2   2  -3   19.04    0.65
  -2   2  -3   18.79    0.64
  -2   2  -3   18.43    0.70
   2  -2   3   18.26    0.65
   2  -2   3   18.08    0.71
   2  -2   3   19.09    0.63
  -3   2  -3    6.25    0.28
  -3   2  -3    6.36    0.34
  -3   2  -3    6.70    0.28
   3  -2   3    5.78    0.34
   3  -2   3    6.82    0.30
  -4   2  -3   19.70    0.80
  -4   2  -3   20.72    0.68
  -4   2  -3   19.26    0.74
   4  -2   3   19.52    0.83
   4  -2   3   19.93    0.75
  -5   2  -3    1.03    0.14
  -5   2  -3    1.46    0.15
  -5   2  -3    1.26    0.19
   5  -2   3    1.48    0.17
   5  -2   3    1.59    0.24
  -6   2  -3    2.86    0.23
  -6   2  -3    2.69    0.21
   6  -2   3    2.61    0.23
   6  -2   3    2.83    0.32
  -7   2  -3    2.87    0.24
  -7   2  -3    2.98    0.19
  -7   2  -3    2.65    0.26
   7  -2   3    3.07    0.27
   7  -2   3    3.28    0.38
  -8   2  -3    3.68    0.30
  -8   2  -3    3.49    0.35
   8  -2   3    3.57    0.36
   8  -2   3    3.28    0.43
  -9   2  -3   -0.12    0.17
  -9   2  -3    0.06    0.18
   9  -2   3   -0.26    0.24
 -10   2  -3    0.24    0.24
 -10   2  -3    0.03    0.20
  10  -2   3   -0.15    0.18
  10  -2   3    0.03    0.32
 -11   2  -3    0.82    0.27
  11  -2   3    0.96    0.27
  11  -2   3    0.90    0.45
 -12   2  -3    2.08    0.40
  12  -2   3    1.79    0.37
  12  -2   3    2.51    0.55
  12   1  -3    1.23    0.33
 -12  -1   3    1.28    0.37
  11   1  -3   -0.45    0.21
 -11  -1   3    0.49    0.28
 -11  -1   3   -0.04    0.27
 -11  -1   3    0.19    0.22
  10   1  -3    0.38    0.22
 -10  -1   3   -0.29    0.23
 -10  -1   3    0.43    0.27
 -10  -1   3    0.36    0.20
   9   1  -3   -0.32    0.14
  -9  -1   3   -0.21    0.20
  -9  -1   3    0.15    0.19
  -9  -1   3    0.17    0.18
  -9  -1   3   -0.04    0.18
   8   1  -3    2.47    0.30
  -8  -1   3    2.02    0.27
  -8  -1   3    2.59    0.32
  -8  -1   3    2.70    0.35
  -8  -1   3    2.62    0.31
   7   1  -3    5.58    0.34
   7   1  -3    5.54    0.37
  -7  -1   3    5.95    0.37
  -7  -1   3    6.14    0.37
  -7  -1   3    6.19    0.39
  -7  -1   3    5.86    0.39
   6   1  -3   14.95    0.61
   6   1  -3   14.56    0.63
  -6  -1   3   14.97    0.63
  -6  -1   3   15.11    0.64
  -6  -1   3   14.65    0.64
   5   1  -3    3.74    0.25
   5   1  -3    3.78    0.25
  -5  -1   3    3.73    0.27
  -5  -1   3    3.55    0.25
  -5  -1   3    3.52    0.25
  -5  -1   3    3.70    0.27
   4   1  -3    0.34    0.10
   4   1  -3    0.28    0.09
  -4  -1   3    0.24    0.08
  -4  -1   3    0.29    0.12
  -4  -1   3    0.23    0.12
   3   1  -3    2.88    0.18
   3   1  -3    3.00    0.19
  -3  -1   3    2.96    0.22
  -3  -1   3    3.25    0.20
  -3  -1   3    3.09    0.23
  -3  -1   3    3.32    0.20
   2   1  -3    2.08    0.15
   2   1  -3    1.94    0.13
  -2  -1   3    1.73    0.13
  -2  -1   3    1.92    0.15
  -2  -1   3    2.01    0.17
   1   1  -3    2.97    0.16
   1   1  -3    3.29    0.18
  -1  -1   3    2.63    0.14
  -1  -1   3    3.12    0.18
   0   1  -3    2.97    0.17
   0   1  -3    3.01    0.16
   0   1  -3    3.18    0.17
   0  -1   3    2.96    0.17
   0  -1   3    2.80    0.16
  -1   1  -3   14.13    0.52
  -1   1  -3   15.72    0.51
  -1   1  -3   13.70    0.53
   1  -1   3   14.19    0.54
   1  -1   3   14.17    0.52
  -2   1  -3    1.72    0.15
  -2   1  -3    1.86    0.12
  -2   1  -3    1.95    0.14
   2  -1   3    2.03    0.13
   2  -1   3    2.09    0.14
  -3   1  -3   33.01    1.12
  -3   1  -3   32.87    1.17
  -3   1  -3   36.51    1.12
   3  -1   3   36.54    1.13
   3  -1   3   30.84    1.17
  -4   1  -3    7.41    0.34
  -4   1  -3    7.54    0.39
  -4   1  -3    8.73    0.34
   4  -1   3    8.22    0.36
   4  -1   3    7.88    0.41
  -5   1  -3   14.18    0.55
  -5   1  -3   12.79    0.58
   5  -1   3   13.70    0.55
   5  -1   3   12.84    0.49
  -6   1  -3   19.17    0.74
  -6   1  -3   19.27    0.70
  -6   1  -3   18.12    0.77
   6  -1   3   17.85    0.81
   6  -1   3   19.85    0.74
  -7   1  -3   14.90    0.60
  -7   1  -3   14.56    0.68
  -7   1  -3   14.82    0.65
   7  -1   3   15.28    0.65
   7  -1   3   15.50    0.73
  -8   1  -3    0.32    0.11
  -8   1  -3    0.18    0.13
  -8   1  -3    0.38    0.17
  -8   1  -3    0.41    0.14
   8  -1   3    0.36    0.13
   8  -1   3    0.51    0.18
  -9   1  -3   -0.06    0.15
  -9   1  -3   -0.04    0.16
  -9   1  -3   -0.02    0.11
   9  -1   3    0.09    0.23
   9  -1   3    0.02    0.14
 -10   1  -3    0.24    0.22
 -10   1  -3    0.39    0.18
  10  -1   3    0.34    0.30
  10  -1   3    0.12    0.17
 -11   1  -3    3.93    0.42
  11  -1   3    4.03    0.61
  11  -1   3    4.56    0.47
 -12   1  -3    0.26    0.28
  12  -1   3    0.90    0.31
  12  -1   3    0.02    0.47
 -13   1  -3    4.41    0.55
  13  -1   3    5.54    0.71
  12   0  -3    0.93    0.33
 -11   0   3    0.64    0.32
 -11   0   3    1.39    0.31
 -11   0   3    1.39    0.28
  10   0  -3    0.16    0.19
 -10   0   3   -0.40    0.29
 -10   0   3    0.09    0.26
 -10   0   3    0.20    0.21
 -10   0   3    0.14    0.20
   9   0  -3    6.07    0.45
  -9   0   3    5.71    0.42
  -9   0   3    5.82    0.49
  -9   0   3    4.90    0.38
  -9   0   3    5.47    0.45
   8   0  -3   10.89    0.56
  -8   0   3    9.79    0.58
  -8   0   3   10.64    0.59
  -8   0   3   10.87    0.52
   7   0  -3    1.26    0.20
  -7   0   3    1.57    0.26
  -7   0   3    1.52    0.23
  -7   0   3    1.39    0.22
  -7   0   3    1.66    0.22
   6   0  -3    2.75    0.24
   6   0  -3    2.97    0.23
   6   0  -3    2.45    0.14
  -6   0   3    2.92    0.27
  -6   0   3    2.90    0.26
  -6   0   3    2.70    0.27
  -6   0   3    2.85    0.24
   5   0  -3    6.22    0.31
   5   0  -3    5.79    0.26
   5   0  -3    6.09    0.33
  -5   0   3    6.44    0.35
  -5   0   3    6.18    0.35
  -5   0   3    5.97    0.34
  -5   0   3    5.80    0.31
   4   0  -3    3.31    0.23
   4   0  -3    3.71    0.23
  -4   0   3    2.94    0.24
  -4   0   3    3.09    0.23
  -4   0   3    3.16    0.21
  -4   0   3    3.02    0.23
   3   0  -3   19.05    0.70
   3   0  -3   19.91    0.69
  -3   0   3   18.56    0.71
  -3   0   3   20.14    0.74
  -3   0   3   19.46    0.73
  -3   0   3   20.20    0.70
   2   0  -3    1.50    0.12
   2   0  -3    1.41    0.12
  -2   0   3    1.16    0.11
  -2   0   3    1.53    0.13
  -2   0   3    1.54    0.16
  -2   0   3    1.66    0.15
   1   0  -3  202.52    6.23
   1   0  -3  196.52    6.22
  -1   0   3  202.69    6.24
  -1   0   3  206.97    6.27
  -1   0   3  207.58    6.25
   0   0  -3    0.02    0.05
   0   0  -3    0.00    0.04
   0   0   3   -0.03    0.04
   0   0   3   -0.04    0.05
   0   0   3    0.06    0.04
  -1   0  -3    1.73    0.13
  -1   0  -3    1.72    0.12
  -1   0  -3    1.67    0.13
   1   0   3    1.74    0.13
   1   0   3    1.85    0.12
  -2   0  -3  129.34    3.83
  -2   0  -3  118.41    3.85
  -2   0  -3  118.14    3.80
   2   0   3  130.11    3.83
   2   0   3  121.34    3.86
  -3   0  -3    2.89    0.17
  -3   0  -3    3.33    0.22
   3   0   3    3.24    0.18
   3   0   3    3.08    0.22
  -4   0  -3   41.62    1.41
  -4   0  -3   38.59    1.34
   4   0   3   41.70    1.35
   4   0   3   41.77    1.42
  -5   0  -3  118.97    3.84
   5   0   3  122.31    3.79
   5   0   3  119.51    3.85
  -6   0  -3    1.76    0.22
  -6   0  -3    1.83    0.18
  -6   0  -3    1.74    0.16
   6   0   3    2.15    0.19
   6   0   3    1.74    0.26
  -7   0  -3   17.88    0.77
  -7   0  -3   18.76    0.68
  -7   0  -3   17.78    0.73
   7   0   3   18.26    0.73
   7   0   3   16.90    0.79
  -8   0  -3    8.11    0.44
  -8   0  -3    7.83    0.40
  -8   0  -3    7.67    0.38
  -8   0  -3    7.58    0.46
   8   0   3    8.17    0.53
   8   0   3    8.18    0.44
  -9   0  -3   14.66    0.61
  -9   0  -3   14.90    0.64
  -9   0  -3   14.44    0.69
  -9   0  -3   14.43    0.71
   9   0   3   15.22    0.70
 -10   0  -3    9.14    0.52
 -10   0  -3    9.40    0.59
 -10   0  -3    9.62    0.60
  10   0   3    9.60    0.56
  10   0   3   10.04    0.65
 -11   0  -3   -0.19    0.21
 -11   0  -3    0.31    0.27
  11   0   3    0.01    0.33
  11   0   3    0.32    0.22
 -12   0  -3    1.40    0.33
  12   0   3    1.64    0.42
 -13   0  -3    0.31    0.32
  13   0   3   -0.34    0.32
  12  -1  -3   -0.10    0.34
 -12   1   3    0.80    0.39
  11  -1  -3    1.01    0.29
 -11   1   3    0.99    0.32
  10  -1  -3   -0.42    0.20
 -10   1   3    0.02    0.25
 -10   1   3    0.05    0.22
   9  -1  -3    1.54    0.26
  -9   1   3    1.57    0.24
  -9   1   3    1.15    0.28
  -9   1   3    0.74    0.26
  -9   1   3    1.75    0.26
   8  -1  -3    7.95    0.47
  -8   1   3    7.47    0.44
  -8   1   3    7.55    0.51
  -8   1   3    7.79    0.43
  -8   1   3    6.98    0.50
   7  -1  -3    6.33    0.39
  -7   1   3    6.13    0.38
  -7   1   3    5.66    0.43
  -7   1   3    5.74    0.34
  -7   1   3    6.04    0.42
   6  -1  -3   16.18    0.67
   6  -1  -3   13.17    0.52
   6  -1  -3   16.00    0.59
  -6   1   3   15.95    0.70
  -6   1   3   15.76    0.67
  -6   1   3   15.87    0.65
  -6   1   3   15.62    0.60
   5  -1  -3    7.15    0.30
   5  -1  -3    7.56    0.34
   5  -1  -3    7.94    0.39
  -5   1   3    7.61    0.39
  -5   1   3    7.75    0.42
  -5   1   3    7.43    0.39
  -5   1   3    7.60    0.35
   4  -1  -3   47.50    1.59
   4  -1  -3   48.38    1.54
   4  -1  -3   45.49    1.53
  -4   1   3   47.98    1.63
  -4   1   3   48.70    1.61
  -4   1   3   46.65    1.59
  -4   1   3   48.77    1.56
   3  -1  -3   63.14    2.20
   3  -1  -3   68.32    2.23
   3  -1  -3   73.74    2.21
  -3   1   3   73.87    2.22
  -3   1   3   70.83    2.27
  -3   1   3   70.15    2.27
  -3   1   3   69.25    2.24
   2  -1  -3   45.60    1.42
   2  -1  -3   43.21    1.42
  -2   1   3   43.29    1.42
  -2   1   3   42.08    1.42
  -2   1   3   44.90    1.46
   1  -1  -3  211.54    6.78
   1  -1  -3  214.70    6.71
   1  -1  -3  216.04    6.73
   1  -1  -3  220.56    6.79
  -1   1   3  224.91    6.77
  -1   1   3  230.02    6.79
  -1   1   3  223.21    6.75
   0  -1  -3   28.36    0.97
   0  -1  -3   27.32    0.94
   0  -1  -3   28.34    0.97
   0   1   3   28.62    0.95
   0   1   3   27.23    0.93
   0   1   3   28.14    0.96
   0   1   3   29.81    0.95
   0   1   3   29.60    0.97
  -1  -1  -3    0.24    0.07
  -1  -1  -3    0.16    0.06
  -1  -1  -3    0.15    0.07
   1   1   3    0.19    0.08
   1   1   3    0.23    0.06
   1   1   3    0.40    0.07
   1   1   3    0.22    0.07
  -2  -1  -3   97.57    2.93
  -2  -1  -3   92.98    2.94
  -2  -1  -3   91.99    2.88
   2   1   3   96.48    2.93
   2   1   3   86.09    2.93
   2   1   3   93.59    2.90
  -3  -1  -3  239.36    7.39
  -3  -1  -3  249.66    7.46
   3   1   3  260.67    7.61
   3   1   3  217.49    7.44
  -4  -1  -3   69.75    2.22
  -4  -1  -3   68.35    2.28
   4   1   3   68.02    2.28
   4   1   3   72.54    2.22
  -5  -1  -3   15.15    0.53
  -5  -1  -3   13.93    0.58
  -5  -1  -3   15.00    0.63
  -5  -1  -3   14.27    0.50
   5   1   3   14.98    0.63
   5   1   3   13.95    0.56
  -6  -1  -3    3.68    0.24
  -6  -1  -3    3.56    0.29
  -6  -1  -3    3.51    0.20
  -6  -1  -3    3.84    0.18
   6   1   3    3.73    0.24
   6   1   3    3.34    0.31
  -7  -1  -3   53.50    1.63
  -7  -1  -3   51.70    1.82
  -7  -1  -3   52.09    1.78
  -7  -1  -3   51.61    1.70
   7   1   3   52.39    1.83
   7   1   3   52.11    1.77
  -8  -1  -3    5.64    0.31
  -8  -1  -3    5.37    0.39
  -8  -1  -3    5.99    0.35
   8   1   3    5.66    0.42
   8   1   3    5.61    0.36
  -9  -1  -3    0.73    0.20
  -9  -1  -3    1.00    0.19
  -9  -1  -3    0.55    0.18
  -9  -1  -3    0.79    0.16
   9   1   3    0.51    0.15
   9   1   3    0.77    0.24
 -10  -1  -3   14.78    0.74
 -10  -1  -3   14.36    0.64
 -10  -1  -3   14.04    0.72
 -10  -1  -3   14.49    0.65
  10   1   3   14.35    0.78
  10   1   3   15.66    0.72
 -11  -1  -3    5.14    0.43
 -11  -1  -3    5.26    0.48
 -11  -1  -3    4.92    0.50
 -11  -1  -3    4.66    0.40
  11   1   3    5.20    0.57
  11   1   3    5.38    0.44
 -12  -1  -3    0.15    0.25
 -12  -1  -3    0.00    0.23
  12   1   3    0.00    0.24
  12   1   3    0.10    0.36
 -13  -1  -3   -0.02    0.30
  13   1   3   -0.33    0.42
  13   1   3    0.41    0.30
  11  -2  -3    3.14    0.43
 -11   2   3    4.46    0.59
  10  -2  -3    4.68    0.50
 -10   2   3    4.09    0.42
 -10   2   3    4.39    0.55
   9  -2  -3    3.19    0.39
  -9   2   3    3.29    0.41
  -9   2   3    3.50    0.46
  -9   2   3    3.84    0.38
  -8   2   3    2.96    0.36
  -8   2   3    4.06    0.33
  -8   2   3    4.33    0.42
   7  -2  -3    1.22    0.22
  -7   2   3    1.23    0.23
  -7   2   3    0.65    0.19
  -7   2   3    0.93    0.22
   6  -2  -3   14.85    0.64
  -6   2   3   13.67    0.67
  -6   2   3   14.46    0.65
  -6   2   3   14.07    0.55
  -6   2   3   14.43    0.63
   5  -2  -3    2.11    0.21
   5  -2  -3    2.40    0.17
   5  -2  -3    2.32    0.16
  -5   2   3    2.65    0.25
  -5   2   3    2.45    0.26
  -5   2   3    2.23    0.19
  -5   2   3    2.85    0.24
   4  -2  -3    2.27    0.18
   4  -2  -3    2.42    0.16
   4  -2  -3    2.57    0.19
   4  -2  -3    2.23    0.17
  -4   2   3    2.48    0.23
  -4   2   3    2.16    0.20
  -4   2   3    2.49    0.19
  -4   2   3    2.35    0.22
   3  -2  -3    4.92    0.26
   3  -2  -3    4.54    0.25
   3  -2  -3    5.17    0.23
  -3   2   3    4.84    0.25
  -3   2   3    4.41    0.29
  -3   2   3    4.46    0.26
  -3   2   3    4.88    0.29
   2  -2  -3    0.92    0.10
   2  -2  -3    1.04    0.12
   2  -2  -3    0.94    0.11
  -2   2   3    0.99    0.13
  -2   2   3    0.96    0.14
  -2   2   3    1.08    0.12
  -2   2   3    1.08    0.13
   1  -2  -3   19.83    0.76
   1  -2  -3   20.68    0.70
   1  -2  -3   20.00    0.73
   1  -2  -3   21.47    0.71
  -1   2   3   20.54    0.75
  -1   2   3   20.68    0.75
  -1   2   3   21.76    0.74
   0  -2  -3   38.41    1.35
   0  -2  -3   40.39    1.34
   0  -2  -3   40.82    1.37
   0   2   3   41.01    1.36
   0   2   3   44.96    1.38
   0   2   3   42.01    1.34
  -1  -2  -3  338.16   10.11
  -1  -2  -3  321.91   10.04
  -1  -2  -3  317.65   10.10
  -1  -2  -3  321.22   10.28
   1   2   3  329.83   10.04
   1   2   3  324.47   10.16
   1   2   3  351.49   10.02
   1   2   3  320.25   10.03
   1   2   3  333.52   10.12
  -2  -2  -3  111.65    3.79
  -2  -2  -3  122.24    3.80
  -2  -2  -3  124.63    3.78
  -2  -2  -3  117.86    3.73
  -2  -2  -3  121.07    3.75
   2   2   3  127.36    3.80
   2   2   3  121.62    3.74
   2   2   3  125.52    3.72
   2   2   3  119.74    3.78
  -3  -2  -3   12.85    0.46
  -3  -2  -3   12.57    0.46
  -3  -2  -3   11.98    0.52
  -3  -2  -3   13.60    0.48
   3   2   3   13.28    0.46
   3   2   3   10.92    0.50
   3   2   3   12.30    0.43
  -4  -2  -3   22.92    0.76
  -4  -2  -3   21.75    0.76
  -4  -2  -3   21.62    0.83
   4   2   3   20.89    0.82
   4   2   3   22.22    0.77
  -5  -2  -3    3.04    0.26
  -5  -2  -3    3.45    0.18
   5   2   3    3.06    0.25
   5   2   3    3.36    0.21
  -6  -2  -3    4.88    0.22
  -6  -2  -3    4.60    0.27
  -6  -2  -3    4.47    0.33
   6   2   3    4.03    0.31
   6   2   3    4.95    0.28
  -7  -2  -3    0.19    0.09
  -7  -2  -3    0.20    0.13
  -7  -2  -3    0.12    0.05
   7   2   3    0.16    0.09
   7   2   3    0.11    0.13
  -8  -2  -3    0.00    0.10
  -8  -2  -3    0.03    0.11
  -8  -2  -3    0.05    0.14
   8   2   3   -0.01    0.08
   8   2   3   -0.07    0.14
  -9  -2  -3    0.49    0.19
  -9  -2  -3    0.62    0.16
  -9  -2  -3    0.36    0.14
  -9  -2  -3    0.34    0.15
   9   2   3    0.68    0.16
   9   2   3    0.42    0.20
 -10  -2  -3    0.10    0.18
 -10  -2  -3    0.13    0.20
 -10  -2  -3    0.30    0.17
 -10  -2  -3    0.47    0.20
  10   2   3    0.07    0.15
  10   2   3    0.12    0.23
 -11  -2  -3    2.93    0.40
 -11  -2  -3    3.00    0.42
 -11  -2  -3    2.90    0.35
 -11  -2  -3    3.11    0.35
  11   2   3    2.68    0.38
  11   2   3    3.06    0.36
 -12  -2  -3    0.07    0.25
 -12  -2  -3    0.29    0.25
 -12  -2  -3   -0.13    0.23
  12   2   3    0.17    0.32
  12   2   3    0.33    0.21
 -13  -2  -3    1.30    0.34
 -13  -2  -3    1.11    0.35
 -13  -2  -3    1.42    0.35
  13   2   3    0.98    0.41
  13   2   3    1.26    0.29
 -14  -2  -3   -0.50    0.42
  11  -3  -3    0.52    0.36
 -11   3   3    0.25    0.38
  10  -3  -3    0.12    0.25
   9  -3  -3   -0.24    0.21
  -9   3   3   -0.06    0.31
  -9   3   3    0.07    0.21
  -9   3   3    0.12    0.27
   8  -3  -3    0.30    0.17
  -8   3   3    0.24    0.23
  -8   3   3    0.56    0.24
  -8   3   3    0.33    0.21
   7  -3  -3    4.70    0.37
   7  -3  -3    3.79    0.37
  -7   3   3    4.27    0.41
  -7   3   3    4.15    0.42
  -7   3   3    5.13    0.37
   6  -3  -3    6.90    0.40
   6  -3  -3    6.32    0.40
  -6   3   3    6.92    0.46
  -6   3   3    7.03    0.41
  -6   3   3    6.45    0.42
   5  -3  -3    0.88    0.13
   5  -3  -3    0.97    0.16
   5  -3  -3    1.14    0.16
  -5   3   3    0.82    0.17
  -5   3   3    1.13    0.20
   4  -3  -3    0.34    0.09
   4  -3  -3    0.39    0.10
  -4   3   3    0.36    0.11
  -4   3   3    0.22    0.11
  -4   3   3    0.28    0.11
   3  -3  -3    2.07    0.15
   3  -3  -3    2.06    0.17
   3  -3  -3    2.13    0.17
  -3   3   3    2.50    0.21
  -3   3   3    2.19    0.21
  -3   3   3    2.23    0.20
  -3   3   3    1.97    0.18
   2  -3  -3   37.20    1.18
   2  -3  -3   37.73    1.28
   2  -3  -3   34.88    1.19
   2  -3  -3   36.45    1.21
  -2   3   3   36.11    1.24
  -2   3   3   34.31    1.19
  -2   3   3   36.18    1.25
  -2   3   3   35.77    1.25
   1  -3  -3   10.94    0.45
   1  -3  -3   11.85    0.44
   1  -3  -3   10.85    0.41
   1  -3  -3   11.02    0.48
  -1   3   3   11.29    0.47
  -1   3   3   10.96    0.46
  -1   3   3   11.23    0.47
   0  -3  -3    4.53    0.24
   0  -3  -3    4.39    0.19
   0  -3  -3    3.92    0.24
   0   3   3    4.96    0.26
   0   3   3    4.28    0.24
   0   3   3    4.33    0.24
  -1  -3  -3    0.65    0.10
  -1  -3  -3    0.60    0.10
  -1  -3  -3    0.45    0.08
   1   3   3    0.69    0.11
   1   3   3    0.49    0.09
   1   3   3    0.50    0.09
   1   3   3    0.73    0.10
  -2  -3  -3  214.45    6.66
  -2  -3  -3  204.71    6.68
  -2  -3  -3  210.33    6.60
  -2  -3  -3  208.46    6.64
  -2  -3  -3  213.73    6.68
   2   3   3  237.85    6.70
   2   3   3  191.47    6.66
   2   3   3  224.60    6.63
   2   3   3  232.51    6.61
   2   3   3  224.72    6.68
  -3  -3  -3  211.34    6.54
  -3  -3  -3  224.01    6.50
  -3  -3  -3  199.80    6.45
  -3  -3  -3  205.21    6.46
   3   3   3  216.90    6.45
   3   3   3  219.34    6.52
   3   3   3  218.16    6.46
   3   3   3  192.78    6.52
  -4  -3  -3    7.29    0.31
  -4  -3  -3    7.38    0.38
  -4  -3  -3    8.03    0.33
  -4  -3  -3    7.83    0.34
   4   3   3    7.57    0.39
   4   3   3    7.76    0.33
   4   3   3    8.03    0.36
  -5  -3  -3   15.78    0.59
  -5  -3  -3   15.55    0.57
  -5  -3  -3   15.55    0.66
   5   3   3   16.60    0.61
   5   3   3   14.94    0.65
   5   3   3   15.48    0.59
  -6  -3  -3   29.33    0.97
  -6  -3  -3   29.63    1.02
  -6  -3  -3   28.30    1.09
   6   3   3   27.94    1.02
  -7  -3  -3    1.93    0.20
  -7  -3  -3    1.82    0.15
  -7  -3  -3    2.20    0.26
   7   3   3    1.94    0.25
   7   3   3    1.92    0.19
  -8  -3  -3    0.08    0.11
  -8  -3  -3   -0.02    0.13
  -8  -3  -3    0.07    0.11
   8   3   3    0.01    0.15
   8   3   3    0.07    0.09
  -9  -3  -3    0.12    0.14
  -9  -3  -3    0.35    0.15
  -9  -3  -3    0.12    0.16
   9   3   3    0.32    0.13
   9   3   3    0.06    0.16
 -10  -3  -3    3.17    0.36
 -10  -3  -3    2.76    0.37
 -10  -3  -3    2.17    0.32
  10   3   3    2.13    0.32
 -11  -3  -3    1.53    0.29
 -11  -3  -3    1.54    0.27
 -11  -3  -3    1.50    0.26
  11   3   3    1.76    0.31
  11   3   3    1.25    0.25
 -12  -3  -3    0.30    0.27
 -12  -3  -3   -0.27    0.23
  12   3   3    0.40    0.23
  12   3   3    0.11    0.29
 -13  -3  -3    0.19    0.31
 -13  -3  -3    0.18    0.29
  13   3   3   -0.06    0.26
  13   3   3    0.27    0.39
 -14  -3  -3    1.47    0.43
  14   3   3    2.33    0.43
 -10   4   3   -0.07    0.35
   9  -4  -3    0.73    0.25
   9  -4  -3    0.27    0.31
  -9   4   3    0.70    0.35
   8  -4  -3    1.66    0.31
   8  -4  -3    2.10    0.31
  -8   4   3    2.25    0.36
  -8   4   3    2.62    0.35
  -8   4   3    2.33    0.34
  -7   4   3    0.00    0.21
  -7   4   3   -0.15    0.17
  -7   4   3   -0.22    0.20
   6  -4  -3    2.16    0.27
   6  -4  -3    2.36    0.32
  -6   4   3    2.01    0.28
  -6   4   3    1.80    0.30
  -6   4   3    2.35    0.29
   5  -4  -3    7.32    0.39
  -5   4   3    7.12    0.41
  -5   4   3    6.57    0.43
   4  -4  -3    0.10    0.10
   4  -4  -3    0.04    0.09
  -4   4   3   -0.04    0.12
  -4   4   3    0.05    0.10
  -4   4   3    0.09    0.14
  -4   4   3    0.04    0.12
   3  -4  -3    3.39    0.23
   3  -4  -3    2.99    0.29
   3  -4  -3    3.61    0.22
  -3   4   3    3.11    0.25
  -3   4   3    3.46    0.27
  -3   4   3    3.28    0.26
   2  -4  -3    3.50    0.24
   2  -4  -3    3.73    0.20
   2  -4  -3    4.25    0.28
   2  -4  -3    3.68    0.21
  -2   4   3    3.66    0.25
  -2   4   3    3.70    0.21
  -2   4   3    3.54    0.26
  -2   4   3    3.57    0.25
   1  -4  -3    2.34    0.20
   1  -4  -3    2.09    0.13
   1  -4  -3    2.05    0.17
  -1   4   3    2.09    0.20
  -1   4   3    2.13    0.20
  -1   4   3    2.36    0.19
   0  -4  -3    2.74    0.20
   0  -4  -3    2.35    0.18
   0  -4  -3    2.58    0.13
   0   4   3    2.64    0.21
   0   4   3    2.58    0.17
   0   4   3    2.75    0.20
   0   4   3    2.46    0.20
  -1  -4  -3    4.26    0.25
  -1  -4  -3    4.67    0.25
   1   4   3    4.48    0.22
   1   4   3    4.99    0.27
   1   4   3    4.72    0.26
   1   4   3    4.49    0.25
  -2  -4  -3   33.11    1.15
  -2  -4  -3   35.89    1.24
  -2  -4  -3   35.63    1.25
   2   4   3   36.98    1.25
   2   4   3   37.46    1.26
   2   4   3   37.60    1.18
   2   4   3   38.49    1.21
  -3  -4  -3   23.01    0.82
  -3  -4  -3   21.01    0.79
  -3  -4  -3   22.51    0.76
  -3  -4  -3   22.35    0.86
   3   4   3   24.09    0.87
   3   4   3   23.62    0.79
   3   4   3   23.34    0.84
   3   4   3   23.88    0.75
  -4  -4  -3   11.74    0.44
  -4  -4  -3   12.34    0.54
  -4  -4  -3   11.22    0.47
  -4  -4  -3   11.00    0.44
   4   4   3   11.63    0.51
   4   4   3   11.87    0.42
   4   4   3   11.59    0.44
   4   4   3   11.75    0.49
  -5  -4  -3    0.29    0.10
  -5  -4  -3    0.28    0.10
  -5  -4  -3    0.34    0.12
   5   4   3    0.20    0.11
   5   4   3    0.42    0.10
   5   4   3    0.23    0.12
  -6  -4  -3   10.07    0.53
  -6  -4  -3   10.88    0.45
  -6  -4  -3   10.14    0.43
   6   4   3   11.18    0.47
   6   4   3    9.63    0.44
  -7  -4  -3    6.77    0.36
  -7  -4  -3    6.60    0.43
  -7  -4  -3    5.95    0.31
   7   4   3    7.34    0.37
   7   4   3    6.79    0.35
   7   4   3    6.73    0.41
  -8  -4  -3    8.73    0.45
  -8  -4  -3    8.65    0.46
  -8  -4  -3    8.01    0.51
   8   4   3    7.84    0.49
   8   4   3    8.83    0.44
  -9  -4  -3    8.57    0.48
  -9  -4  -3    8.04    0.53
  -9  -4  -3    8.86    0.49
   9   4   3    8.40    0.51
   9   4   3    8.79    0.47
 -10  -4  -3    1.09    0.24
 -10  -4  -3    0.76    0.22
 -10  -4  -3    0.89    0.20
  10   4   3    1.39    0.28
  10   4   3    0.84    0.18
 -11  -4  -3    9.02    0.60
 -11  -4  -3   10.15    0.64
 -11  -4  -3    9.96    0.62
  11   4   3    8.78    0.56
  11   4   3    9.82    0.64
 -12  -4  -3    0.02    0.24
 -12  -4  -3    0.12    0.26
  12   4   3    0.67    0.29
  12   4   3    0.30    0.21
 -13  -4  -3    0.22    0.32
 -13  -4  -3   -0.14    0.32
  13   4   3    0.19    0.23
  13   4   3    0.11    0.36
 -14  -4  -3   -0.44    0.36
  14   4   3    0.12    0.29
  10  -5  -3    1.89    0.40
 -10   5   3    2.09    0.52
   9  -5  -3    0.68    0.29
   9  -5  -3    0.97    0.38
  -9   5   3    0.60    0.38
   8  -5  -3    1.61    0.29
  -8   5   3    1.92    0.38
   7  -5  -3    0.35    0.24
   7  -5  -3    0.02    0.17
  -7   5   3    0.01    0.23
  -7   5   3   -0.13    0.23
  -7   5   3    0.12    0.22
   6  -5  -3    1.85    0.24
   6  -5  -3    2.84    0.38
  -6   5   3    2.49    0.34
  -6   5   3    1.96    0.28
  -6   5   3    2.23    0.29
   5  -5  -3   15.61    0.66
   5  -5  -3   15.67    0.71
   5  -5  -3   14.42    0.75
  -5   5   3   14.99    0.70
  -5   5   3   15.15    0.70
  -5   5   3   14.70    0.74
  -5   5   3   16.31    0.68
   4  -5  -3    3.73    0.35
   4  -5  -3    4.16    0.27
  -4   5   3    4.09    0.34
  -4   5   3    3.82    0.30
  -4   5   3    3.74    0.32
  -4   5   3    3.96    0.31
   3  -5  -3    9.44    0.41
  -3   5   3    9.12    0.48
  -3   5   3    9.15    0.48
  -3   5   3    8.77    0.46
   2  -5  -3   51.87    1.64
   2  -5  -3   52.18    1.65
   2  -5  -3   50.65    1.75
  -2   5   3   52.78    1.76
  -2   5   3   50.03    1.74
  -2   5   3   50.02    1.66
  -2   5   3   50.56    1.74
   1  -5  -3   37.27    1.31
   1  -5  -3   37.57    1.21
   1  -5  -3   38.47    1.33
  -1   5   3   37.99    1.32
  -1   5   3   36.65    1.30
  -1   5   3   36.63    1.30
   0  -5  -3   18.87    0.62
   0  -5  -3   19.05    0.73
   0   5   3   19.00    0.71
   0   5   3   18.03    0.72
   0   5   3   17.80    0.75
   0   5   3   19.71    0.73
  -1  -5  -3    2.15    0.19
   1   5   3    2.25    0.19
   1   5   3    2.10    0.20
   1   5   3    2.28    0.16
   1   5   3    1.92    0.18
  -2  -5  -3   20.98    0.70
  -2  -5  -3   21.37    0.82
   2   5   3   21.41    0.75
   2   5   3   22.09    0.79
   2   5   3   23.20    0.83
  -3  -5  -3  176.86    5.60
  -3  -5  -3  167.36    5.46
  -3  -5  -3  181.35    5.56
   3   5   3  183.24    5.61
   3   5   3  180.70    5.47
   3   5   3  178.78    5.58
   3   5   3  181.49    5.52
  -4  -5  -3   -0.03    0.07
  -4  -5  -3    0.07    0.05
  -4  -5  -3   -0.09    0.08
   4   5   3    0.09    0.06
   4   5   3   -0.03    0.08
  -5  -5  -3  174.91    5.84
  -5  -5  -3  187.43    5.90
  -5  -5  -3  190.74    5.98
  -5  -5  -3  196.18    5.86
   5   5   3  195.41    5.86
   5   5   3  194.69    5.92
  -6  -5  -3    0.99    0.14
  -6  -5  -3    0.56    0.10
  -6  -5  -3    0.74    0.13
  -6  -5  -3    0.85    0.18
   6   5   3    0.97    0.15
   6   5   3    0.85    0.16
   6   5   3    0.95    0.14
  -7  -5  -3   10.93    0.58
  -7  -5  -3   11.14    0.49
  -7  -5  -3   10.95    0.48
   7   5   3   11.15    0.56
   7   5   3   10.72    0.49
   7   5   3   11.66    0.51
  -8  -5  -3   39.00    1.38
  -8  -5  -3   39.01    1.42
  -8  -5  -3   38.02    1.47
   8   5   3   40.98    1.37
   8   5   3   38.33    1.43
   8   5   3   38.47    1.37
  -9  -5  -3    1.20    0.21
  -9  -5  -3    1.12    0.25
  -9  -5  -3    0.89    0.18
   9   5   3    0.85    0.18
 -10  -5  -3   -0.06    0.21
 -10  -5  -3   -0.26    0.15
 -10  -5  -3   -0.04    0.18
  10   5   3   -0.06    0.12
  10   5   3    0.05    0.19
 -11  -5  -3    5.62    0.51
 -11  -5  -3    4.65    0.50
 -11  -5  -3    5.82    0.48
  11   5   3    5.12    0.44
  11   5   3    4.90    0.49
 -12  -5  -3    0.35    0.28
 -12  -5  -3    0.31    0.28
 -12  -5  -3   -0.04    0.28
  12   5   3    0.30    0.27
  12   5   3    0.26    0.20
 -13  -5  -3    1.86    0.39
 -13  -5  -3    1.47    0.39
  13   5   3    1.46    0.40
 -14  -5  -3    0.01    0.40
 -14  -5  -3   -0.37    0.35
  14   5   3   -0.09    0.31
   9  -6  -3    3.64    0.72
   9  -6  -3    5.06    0.61
  -9   6   3    4.01    0.59
   8  -6  -3    1.66    0.48
   8  -6  -3    0.81    0.38
   8  -6  -3    1.11    0.30
  -8   6   3    1.09    0.34
   7  -6  -3    8.12    0.70
   7  -6  -3    7.42    0.66
   7  -6  -3    8.02    0.52
  -7   6   3    8.36    0.61
  -7   6   3    8.16    0.62
   6  -6  -3    2.25    0.35
   6  -6  -3    1.73    0.24
   6  -6  -3    2.27    0.39
  -6   6   3    1.70    0.32
  -6   6   3    2.06    0.31
  -6   6   3    2.06    0.28
   5  -6  -3    1.45    0.21
   5  -6  -3    1.46    0.28
   5  -6  -3    2.35    0.39
  -5   6   3    1.52    0.26
  -5   6   3    1.65    0.26
  -5   6   3    1.54    0.28
  -5   6   3    1.92    0.24
   4  -6  -3    4.91    0.41
   4  -6  -3    4.52    0.30
  -4   6   3    4.52    0.40
  -4   6   3    4.91    0.39
  -4   6   3    5.27    0.35
  -4   6   3    4.63    0.39
   3  -6  -3    2.84    0.27
   3  -6  -3    2.99    0.21
  -3   6   3    2.78    0.27
  -3   6   3    2.93    0.28
  -3   6   3    2.97    0.30
   2  -6  -3    1.03    0.13
   2  -6  -3    0.77    0.15
   2  -6  -3    0.77    0.13
   2  -6  -3    0.84    0.18
  -2   6   3    0.93    0.13
  -2   6   3    0.91    0.15
  -2   6   3    0.79    0.16
  -2   6   3    0.76    0.19
   1  -6  -3   11.44    0.41
   1  -6  -3   11.11    0.51
   1  -6  -3   10.48    0.50
  -1   6   3   11.24    0.51
  -1   6   3   10.42    0.52
  -1   6   3   10.42    0.49
   0  -6  -3    0.84    0.08
   0  -6  -3    0.65    0.13
   0  -6  -3    0.86    0.14
   0   6   3    0.80    0.16
   0   6   3    0.75    0.13
   0   6   3    0.96    0.15
   0   6   3    0.65    0.14
  -1  -6  -3   81.22    2.63
  -1  -6  -3   82.29    2.65
   1   6   3   78.10    2.59
   1   6   3   80.76    2.66
   1   6   3   82.90    2.64
   1   6   3   80.46    2.62
  -2  -6  -3    0.59    0.15
  -2  -6  -3    0.39    0.05
   2   6   3    0.75    0.13
   2   6   3    0.35    0.11
   2   6   3    0.59    0.12
  -3  -6  -3   14.29    0.63
  -3  -6  -3   13.54    0.48
  -3  -6  -3   14.48    0.62
   3   6   3   14.70    0.63
   3   6   3   14.22    0.52
   3   6   3   14.64    0.57
   3   6   3   14.79    0.63
  -4  -6  -3  347.34   11.45
  -4  -6  -3  386.00   11.55
  -4  -6  -3  369.31   11.59
   4   6   3  370.01   11.55
   4   6   3  383.63   11.42
   4   6   3  393.39   11.61
   4   6   3  377.58   11.46
  -5  -6  -3   19.82    0.83
  -5  -6  -3   18.54    0.70
  -5  -6  -3   19.97    0.78
   5   6   3   20.34    0.79
   5   6   3   20.21    0.70
  -6  -6  -3   15.00    0.63
  -6  -6  -3   14.02    0.69
   6   6   3   15.71    0.59
   6   6   3   15.50    0.65
  -7  -6  -3    0.24    0.12
  -7  -6  -3    0.22    0.16
  -7  -6  -3    0.38    0.11
  -7  -6  -3    0.19    0.16
   7   6   3    0.17    0.09
   7   6   3    0.38    0.13
  -8  -6  -3    1.90    0.23
  -8  -6  -3    2.52    0.30
  -8  -6  -3    3.02    0.39
   8   6   3    2.57    0.27
   8   6   3    2.16    0.23
  -9  -6  -3   16.06    0.79
  -9  -6  -3   17.90    0.86
  -9  -6  -3   18.43    0.76
   9   6   3   17.73    0.75
   9   6   3   17.87    0.75
 -10  -6  -3    5.05    0.41
 -10  -6  -3    5.23    0.48
 -10  -6  -3    4.44    0.45
  10   6   3    4.71    0.37
 -11  -6  -3    1.39    0.34
 -11  -6  -3    1.13    0.26
 -11  -6  -3    1.15    0.31
  11   6   3    0.83    0.20
 -12  -6  -3    0.58    0.29
 -12  -6  -3    0.28    0.28
 -12  -6  -3    0.30    0.26
  12   6   3    0.22    0.20
 -13  -6  -3   -0.12    0.33
 -13  -6  -3    0.02    0.35
 -14  -6  -3    0.42    0.40
 -14  -6  -3   -0.43    0.44
  14   6   3    0.93    0.31
   8  -7  -3    1.92    0.58
   8  -7  -3    1.85    0.51
   8  -7  -3    2.51    0.36
  -8   7   3    2.07    0.43
  -8   7   3    1.98    0.47
   7  -7  -3    0.68    0.38
   7  -7  -3    0.20    0.40
  -7   7   3    0.16    0.25
  -7   7   3    0.14    0.30
   6  -7  -3    5.42    0.42
   6  -7  -3    6.46    0.60
   6  -7  -3    6.44    0.61
  -6   7   3    5.45    0.51
  -6   7   3    5.69    0.54
  -6   7   3    5.10    0.50
   5  -7  -3    2.76    0.42
   5  -7  -3    2.82    0.39
   5  -7  -3    2.89    0.29
  -5   7   3    2.92    0.36
  -5   7   3    2.99    0.42
  -5   7   3    2.56    0.35
   4  -7  -3    6.50    0.35
   4  -7  -3    6.41    0.48
  -4   7   3    6.37    0.48
  -4   7   3    6.44    0.44
  -4   7   3    6.74    0.39
  -4   7   3    6.05    0.44
   3  -7  -3    0.99    0.14
  -3   7   3    0.97    0.23
  -3   7   3    0.73    0.23
  -3   7   3    0.63    0.18
   2  -7  -3   30.40    1.09
   2  -7  -3   33.39    1.22
   2  -7  -3   34.44    1.10
   2  -7  -3   33.10    1.12
  -2   7   3   32.81    1.24
  -2   7   3   34.54    1.27
  -2   7   3   32.61    1.23
   1  -7  -3   -0.02    0.06
   1  -7  -3   -0.03    0.15
   1  -7  -3    0.11    0.13
  -1   7   3    0.16    0.11
  -1   7   3    0.08    0.11
  -1   7   3    0.14    0.14
   0  -7  -3    1.23    0.18
   0  -7  -3    1.57    0.23
   0   7   3    1.29    0.19
   0   7   3    1.24    0.20
   0   7   3    1.16    0.18
   0   7   3    1.03    0.19
  -1  -7  -3   17.43    0.73
   1   7   3   16.52    0.70
   1   7   3   16.83    0.74
   1   7   3   16.74    0.67
   1   7   3   17.60    0.71
  -2  -7  -3   57.40    1.95
   2   7   3   56.44    1.91
   2   7   3   57.62    1.97
   2   7   3   55.14    1.86
   2   7   3   59.18    1.94
  -3  -7  -3   19.39    0.70
  -3  -7  -3   22.80    0.88
   3   7   3   22.50    0.78
   3   7   3   22.18    0.89
   3   7   3   23.02    0.88
  -4  -7  -3    1.96    0.13
  -4  -7  -3    2.01    0.24
  -4  -7  -3    2.81    0.27
   4   7   3    2.02    0.23
   4   7   3    2.56    0.26
  -5  -7  -3    7.54    0.45
  -5  -7  -3    7.28    0.32
  -5  -7  -3    7.75    0.43
   5   7   3    7.65    0.31
   5   7   3    7.27    0.42
   5   7   3    7.70    0.33
  -6  -7  -3    0.13    0.13
  -6  -7  -3    0.37    0.15
   6   7   3    0.32    0.13
   6   7   3    0.03    0.08
  -7  -7  -3    0.11    0.09
  -7  -7  -3    0.13    0.13
  -7  -7  -3    0.36    0.17
  -7  -7  -3   -0.02    0.12
   7   7   3    0.04    0.13
   7   7   3    0.07    0.09
  -8  -7  -3    0.28    0.19
  -8  -7  -3    0.40    0.13
  -8  -7  -3    0.33    0.17
   8   7   3    0.29    0.12
   8   7   3    0.31    0.16
  -9  -7  -3   16.66    0.85
  -9  -7  -3   17.25    0.75
  -9  -7  -3   16.39    0.83
   9   7   3   16.78    0.75
   9   7   3   17.48    0.77
 -10  -7  -3    1.15    0.28
 -10  -7  -3    1.20    0.24
 -10  -7  -3    1.12    0.29
  10   7   3    1.27    0.23
  10   7   3    1.28    0.27
 -11  -7  -3   -0.08    0.24
 -11  -7  -3    0.12    0.25
 -11  -7  -3    0.11    0.20
  11   7   3    0.02    0.16
 -12  -7  -3    0.33    0.29
 -12  -7  -3    0.33    0.31
 -12  -7  -3    0.91    0.35
  12   7   3    0.64    0.22
 -13  -7  -3    0.22    0.36
 -13  -7  -3    0.55    0.36
  13   7   3    0.77    0.26
 -14  -7  -3    0.33    0.42
  14   7   3    0.27    0.32
   8  -8  -3    0.32    0.34
  -8   8   3    0.19    0.36
   7  -8  -3    0.15    0.26
   7  -8  -3    0.42    0.47
   7  -8  -3    0.13    0.46
  -7   8   3   -0.51    0.34
  -7   8   3    0.79    0.34
   6  -8  -3   -0.06    0.19
   6  -8  -3    0.17    0.39
   6  -8  -3    0.41    0.34
  -6   8   3   -0.02    0.25
  -6   8   3   -0.58    0.25
  -6   8   3    0.26    0.34
   5  -8  -3    0.29    0.16
   5  -8  -3    0.10    0.25
   5  -8  -3    0.04    0.31
  -5   8   3    0.23    0.27
  -5   8   3    0.15    0.21
  -5   8   3   -0.24    0.21
   4  -8  -3    0.88    0.24
   4  -8  -3    1.18    0.18
  -4   8   3    0.68    0.20
  -4   8   3    0.93    0.28
  -4   8   3    0.59    0.27
   3  -8  -3    2.28    0.34
   3  -8  -3    2.88    0.22
  -3   8   3    2.15    0.30
  -3   8   3    2.47    0.34
   2  -8  -3    0.02    0.11
   2  -8  -3    0.11    0.09
  -2   8   3    0.08    0.14
  -2   8   3   -0.26    0.20
   1  -8  -3    5.94    0.25
   1  -8  -3    5.80    0.33
   1  -8  -3    5.76    0.38
  -1   8   3    6.21    0.46
  -1   8   3    6.24    0.39
   0  -8  -3   20.94    0.85
   0  -8  -3   21.47    0.91
   0   8   3   20.91    0.85
   0   8   3   21.84    0.85
   0   8   3   21.74    0.92
  -1  -8  -3   -0.07    0.15
   1   8   3    0.04    0.15
   1   8   3    0.04    0.10
   1   8   3   -0.07    0.11
  -2  -8  -3    4.59    0.36
   2   8   3    4.03    0.31
   2   8   3    4.51    0.37
   2   8   3    4.21    0.27
  -3  -8  -3    0.25    0.14
   3   8   3    0.36    0.13
   3   8   3    0.14    0.10
   3   8   3    0.34    0.15
  -4  -8  -3   28.73    1.09
  -4  -8  -3   25.29    0.90
  -4  -8  -3   27.94    1.11
   4   8   3   28.69    1.11
   4   8   3   28.45    1.10
   4   8   3   28.12    0.96
  -5  -8  -3    0.08    0.14
  -5  -8  -3    0.06    0.14
  -5  -8  -3    0.06    0.07
   5   8   3    0.05    0.15
   5   8   3   -0.01    0.07
   5   8   3    0.16    0.13
  -6  -8  -3    3.25    0.35
  -6  -8  -3    3.07    0.32
  -6  -8  -3    3.64    0.32
  -6  -8  -3    3.55    0.22
   6   8   3    3.38    0.22
   6   8   3    3.49    0.33
  -7  -8  -3    0.04    0.14
  -7  -8  -3   -0.01    0.14
  -7  -8  -3    0.19    0.10
   7   8   3    0.08    0.14
   7   8   3    0.11    0.09
  -8  -8  -3   26.29    1.10
  -8  -8  -3   26.97    1.16
   8   8   3   25.74    0.98
   8   8   3   27.53    1.07
  -9  -8  -3    4.13    0.35
  -9  -8  -3    3.21    0.42
  -9  -8  -3    4.73    0.49
   9   8   3    4.12    0.33
   9   8   3    4.91    0.41
 -10  -8  -3    4.55    0.47
 -10  -8  -3    5.06    0.54
 -10  -8  -3    4.76    0.42
  10   8   3    5.37    0.40
  10   8   3    5.35    0.45
 -11  -8  -3    4.73    0.45
 -11  -8  -3    4.53    0.54
 -11  -8  -3    3.89    0.53
  11   8   3    5.13    0.43
  11   8   3    4.73    0.45
 -12  -8  -3    0.19    0.33
 -12  -8  -3    0.64    0.27
 -12  -8  -3    0.34    0.33
  12   8   3    0.12    0.23
 -13  -8  -3    1.46    0.45
  13   8   3    1.26    0.29
 -14  -8  -3    1.19    0.48
  14   8   3    1.82    0.37
   7  -9  -3    0.05    0.33
  -7   9   3    0.93    0.37
   6  -9  -3    0.65    0.26
   6  -9  -3    0.94    0.50
  -6   9   3    0.96    0.44
  -6   9   3    0.84    0.32
  -6   9   3    0.79    0.36
   5  -9  -3    0.09    0.18
   5  -9  -3    0.39    0.38
   5  -9  -3   -0.13    0.29
  -5   9   3    0.26    0.25
  -5   9   3    0.63    0.27
  -5   9   3    0.08    0.33
   4  -9  -3    0.21    0.15
   4  -9  -3    0.19    0.23
  -4   9   3    0.01    0.28
  -4   9   3   -0.03    0.20
   3  -9  -3    0.89    0.14
   3  -9  -3    0.84    0.24
  -3   9   3    0.85    0.22
  -3   9   3    0.77    0.28
   2  -9  -3    0.83    0.15
   2  -9  -3    0.76    0.11
  -2   9   3    0.65    0.19
  -2   9   3    0.80    0.23
   1  -9  -3    0.22    0.14
   1  -9  -3    0.22    0.17
  -1   9   3    0.29    0.21
  -1   9   3    0.31    0.15
   0  -9  -3    5.83    0.37
   0   9   3    5.48    0.38
   0   9   3    6.49    0.48
  -1  -9  -3   16.08    0.69
   1   9   3   16.12    0.70
   1   9   3   16.14    0.71
   1   9   3   16.99    0.80
  -2  -9  -3   21.15    0.88
   2   9   3   21.68    0.85
   2   9   3   23.27    0.91
   2   9   3   22.41    0.97
  -3  -9  -3   40.17    1.49
  -3  -9  -3   42.00    1.54
   3   9   3   41.45    1.56
   3   9   3   42.07    1.51
   3   9   3   41.64    1.42
  -4  -9  -3    1.43    0.24
  -4  -9  -3    1.14    0.20
   4   9   3    1.21    0.23
   4   9   3    1.39    0.24
   4   9   3    1.39    0.17
  -5  -9  -3   50.81    1.82
  -5  -9  -3   50.09    1.75
  -5  -9  -3   43.37    1.55
   5   9   3   49.86    1.60
   5   9   3   49.50    1.79
   5   9   3   49.23    1.78
  -6  -9  -3   10.38    0.60
  -6  -9  -3   10.58    0.57
  -6  -9  -3    9.78    0.42
   6   9   3    9.86    0.57
   6   9   3    9.66    0.41
   6   9   3    9.83    0.42
  -7  -9  -3   22.87    1.02
  -7  -9  -3   23.17    0.98
  -7  -9  -3   20.77    0.82
   7   9   3   22.07    0.96
   7   9   3   22.41    0.82
  -8  -9  -3    4.34    0.31
  -8  -9  -3    4.18    0.43
  -8  -9  -3    3.84    0.46
   8   9   3    4.27    0.32
   8   9   3    3.91    0.40
  -9  -9  -3   27.00    1.02
  -9  -9  -3   26.09    1.16
  -9  -9  -3   25.92    1.18
   9   9   3   26.45    1.01
   9   9   3   26.38    1.11
 -10  -9  -3    9.04    0.54
 -10  -9  -3    8.95    0.66
 -10  -9  -3    9.44    0.67
  10   9   3    8.31    0.58
  10   9   3    8.48    0.51
 -11  -9  -3    0.97    0.35
 -11  -9  -3    0.69    0.23
 -11  -9  -3   -0.19    0.29
  11   9   3    0.27    0.20
  11   9   3    0.25    0.25
 -12  -9  -3    0.55    0.29
 -12  -9  -3    0.93    0.40
  12   9   3    0.56    0.26
  12   9   3    1.05    0.32
 -13  -9  -3   -0.43    0.42
  13   9   3    0.27    0.26
 -14  -9  -3   -0.44    0.52
  14   9   3    0.82    0.36
  -6  10   3    1.23    0.52
  -6  10   3   -0.33    0.36
   5 -10  -3   -0.41    0.45
   5 -10  -3    0.21    0.21
  -5  10   3   -0.17    0.42
  -5  10   3    0.74    0.32
   4 -10  -3    0.21    0.17
   4 -10  -3   -0.39    0.25
  -4  10   3    0.29    0.37
  -4  10   3   -0.25    0.27
   3 -10  -3    0.34    0.13
  -3  10   3    0.46    0.32
   2 -10  -3    0.07    0.13
  -2  10   3   -0.04    0.18
  -1  10   3    0.43    0.26
  -1  10   3    0.24    0.20
   0 -10  -3   -0.16    0.15
   0  10   3    0.30    0.22
   0  10   3   -0.26    0.16
  -1 -10  -3    0.13    0.16
   1  10   3    0.12    0.21
   1  10   3    0.21    0.14
   1  10   3    0.21    0.14
  -2 -10  -3    1.83    0.27
   2  10   3    1.63    0.23
   2  10   3    2.00    0.30
   2  10   3    1.99    0.38
  -3 -10  -3    0.88    0.21
   3  10   3    0.79    0.25
   3  10   3    0.66    0.15
   3  10   3    0.78    0.20
  -4 -10  -3   14.88    0.72
   4  10   3   15.13    0.63
   4  10   3   15.42    0.79
   4  10   3   15.22    0.73
  -5 -10  -3   10.80    0.41
  -5 -10  -3   12.48    0.70
  -5 -10  -3   12.26    0.65
   5  10   3   12.16    0.51
   5  10   3   11.30    0.68
   5  10   3   11.38    0.65
  -6 -10  -3   14.44    0.75
  -6 -10  -3   14.25    0.78
  -6 -10  -3   13.27    0.54
   6  10   3   14.97    0.78
   6  10   3   14.03    0.78
   6  10   3   14.33    0.56
  -7 -10  -3    0.56    0.23
  -7 -10  -3    1.11    0.30
   7  10   3    0.64    0.13
   7  10   3    0.77    0.23
  -8 -10  -3    6.49    0.53
  -8 -10  -3    6.15    0.55
  -8 -10  -3    6.62    0.39
   8  10   3    6.68    0.37
   8  10   3    7.22    0.53
  -9 -10  -3    0.33    0.25
  -9 -10  -3   -0.20    0.21
  -9 -10  -3   -0.09    0.16
   9  10   3    0.50    0.25
   9  10   3    0.32    0.16
 -10 -10  -3    2.00    0.39
 -10 -10  -3    1.41    0.27
 -10 -10  -3    1.15    0.30
  10  10   3    2.02    0.26
  10  10   3    2.01    0.35
 -11 -10  -3    2.13    0.33
 -11 -10  -3    2.49    0.43
  11  10   3    1.77    0.36
  11  10   3    2.34    0.31
 -12 -10  -3    0.37    0.38
 -12 -10  -3    1.15    0.34
  12  10   3    0.78    0.27
  12  10   3    0.48    0.33
 -13 -10  -3    0.52    0.45
  13  10   3   -0.05    0.28
  13  10   3    0.03    0.39
 -14 -10  -3    1.17    0.57
  14  10   3    1.25    0.40
  -5  11   3    0.37    0.34
  -5  11   3   -0.21    0.52
  -4  11   3    0.16    0.43
  -4  11   3    0.79    0.31
  -3  11   3    1.44    0.40
  -3  11   3    0.56    0.26
  -2  11   3    0.81    0.35
   1 -11  -3    0.12    0.19
  -1  11   3    0.29    0.30
  -1  11   3    0.36    0.22
   0 -11  -3    0.52    0.20
   0  11   3    0.50    0.21
   0  11   3    0.67    0.30
  -1 -11  -3   -0.04    0.20
   1  11   3    0.41    0.26
   1  11   3    0.47    0.18
   1  11   3    0.16    0.17
  -2 -11  -3    0.12    0.21
   2  11   3   -0.04    0.23
   2  11   3    0.16    0.18
   2  11   3    0.09    0.17
  -3 -11  -3   31.71    1.24
   3  11   3   30.14    1.21
   3  11   3   31.18    1.32
   3  11   3   28.47    1.13
  -4 -11  -3    0.51    0.21
   4  11   3    0.80    0.22
   4  11   3    0.58    0.17
   4  11   3    0.52    0.26
  -5 -11  -3    4.48    0.50
  -5 -11  -3    2.80    0.42
   5  11   3    3.70    0.31
   5  11   3    3.98    0.40
  -6 -11  -3   11.66    0.46
  -6 -11  -3   13.18    0.78
  -6 -11  -3   12.11    0.70
   6  11   3   11.90    0.69
   6  11   3   11.72    0.52
  -7 -11  -3    1.22    0.32
  -7 -11  -3    0.95    0.17
  -7 -11  -3    1.20    0.27
   7  11   3    1.12    0.17
   7  11   3    1.15    0.28
  -8 -11  -3    0.78    0.18
  -8 -11  -3    1.13    0.30
  -8 -11  -3    1.17    0.29
   8  11   3    0.69    0.16
  -9 -11  -3    0.90    0.33
  -9 -11  -3    0.81    0.20
  -9 -11  -3    0.46    0.26
   9  11   3    0.57    0.16
 -10 -11  -3    0.49    0.35
 -10 -11  -3    0.38    0.24
  10  11   3    0.57    0.21
 -11 -11  -3   -0.07    0.27
 -11 -11  -3    0.42    0.40
 -12 -11  -3    0.61    0.42
 -12 -11  -3    0.00    0.34
  12  11   3    0.26    0.27
 -13 -11  -3    0.49    0.54
  13  11   3    0.08    0.31
  -4  12   3    0.53    0.32
  -4  12   3    1.49    0.60
  -3  12   3    0.04    0.42
  -3  12   3   -0.12    0.27
  -2  12   3    1.22    0.32
  -2  12   3    0.16    0.42
   1 -12  -3   -0.01    0.22
  -1  12   3    0.44    0.35
  -1  12   3    0.25    0.27
   0 -12  -3    0.52    0.27
   0  12   3    1.10    0.26
   0  12   3    1.38    0.38
  -1 -12  -3    2.46    0.35
   1  12   3    2.53    0.44
   1  12   3    2.06    0.32
  -2 -12  -3    3.13    0.39
   2  12   3    2.50    0.39
   2  12   3    2.56    0.33
   2  12   3    3.13    0.36
  -3 -12  -3    1.21    0.30
   3  12   3    1.03    0.26
   3  12   3    0.81    0.21
   3  12   3    1.03    0.31
  -4 -12  -3    1.62    0.34
   4  12   3    1.60    0.25
   4  12   3    1.34    0.35
   4  12   3    1.73    0.31
  -5 -12  -3    0.64    0.26
  -5 -12  -3    0.08    0.26
   5  12   3    0.42    0.18
   5  12   3    0.19    0.23
   5  12   3   -0.18    0.26
  -6 -12  -3    4.66    0.58
  -6 -12  -3    3.35    0.51
   6  12   3    4.08    0.51
   6  12   3    4.22    0.48
   6  12   3    3.83    0.34
  -7 -12  -3   -0.27    0.13
  -7 -12  -3   -0.31    0.24
  -7 -12  -3   -0.26    0.25
   7  12   3   -0.06    0.25
   7  12   3    0.35    0.28
   7  12   3   -0.02    0.17
  -8 -12  -3    4.49    0.35
  -8 -12  -3    4.15    0.61
  -8 -12  -3    2.63    0.44
   8  12   3    4.62    0.54
   8  12   3    2.97    0.50
  -9 -12  -3    2.29    0.41
   9  12   3    2.61    0.45
   9  12   3    2.12    0.26
 -10 -12  -3    0.24    0.23
 -10 -12  -3    0.35    0.37
  10  12   3    0.40    0.20
  10  12   3    0.24    0.33
 -11 -12  -3    0.53    0.44
 -11 -12  -3   -0.02    0.28
  11  12   3    0.78    0.41
  11  12   3    0.31    0.23
 -12 -12  -3    0.00    0.36
 -12 -12  -3    0.76    0.47
  12  12   3    0.08    0.27
  12  12   3   -0.39    0.40
 -13 -12  -3    0.60    0.52
  13  12   3    0.45    0.36
  13  12   3    0.35    0.49
  -2  13   3    3.60    0.65
  -2  13   3    3.39    0.49
  -1  13   3    1.05    0.33
   0 -13  -3    2.16    0.36
   0  13   3    2.94    0.53
   0  13   3    2.88    0.41
  -1 -13  -3    0.32    0.31
   1  13   3    0.30    0.24
   1  13   3    0.51    0.35
  -2 -13  -3    2.27    0.39
   2  13   3    2.82    0.38
   2  13   3    2.01    0.30
   2  13   3    1.82    0.43
  -3 -13  -3   -0.02    0.30
   3  13   3    0.32    0.21
   3  13   3   -0.16    0.26
   3  13   3   -0.22    0.34
  -4 -13  -3    4.49    0.59
   4  13   3    4.66    0.52
   4  13   3    4.23    0.58
   4  13   3    4.19    0.39
  -5 -13  -3    0.03    0.30
  -5 -13  -3    0.17    0.31
   5  13   3    0.61    0.21
   5  13   3    0.36    0.28
   5  13   3    0.26    0.31
  -6 -13  -3    2.07    0.43
  -6 -13  -3    2.63    0.41
   6  13   3    2.46    0.41
   6  13   3    2.71    0.32
   6  13   3    2.32    0.40
  -7 -13  -3    0.17    0.33
  -7 -13  -3    0.08    0.36
   7  13   3    0.73    0.23
   7  13   3    0.58    0.36
  -8 -13  -3    3.32    0.51
   8  13   3    3.53    0.58
   8  13   3    3.34    0.39
   8  13   3    2.90    0.45
  -9 -13  -3    0.06    0.22
  -9 -13  -3    0.50    0.38
   9  13   3   -0.04    0.34
   9  13   3    0.17    0.32
 -10 -13  -3    0.93    0.29
 -10 -13  -3   -0.17    0.40
  10  13   3    0.74    0.39
  10  13   3    0.90    0.22
 -11 -13  -3    0.87    0.36
 -11 -13  -3    0.95    0.50
  11  13   3    1.11    0.45
  11  13   3    0.94    0.26
 -12 -13  -3    0.49    0.45
  12  13   3    0.45    0.49
  12  13   3    1.44    0.32
  -1  14   3    3.17    0.47
  -1  14   3    2.18    0.64
   0  14   3    0.23    0.30
   0  14   3   -0.22    0.49
  -1 -14  -3    2.67    0.47
   1  14   3    4.42    0.54
   1  14   3    3.07    0.58
  -2 -14  -3   -0.16    0.38
   2  14   3    0.62    0.40
  -3 -14  -3    4.17    0.54
   3  14   3    4.21    0.58
   3  14   3    3.69    0.44
   3  14   3    4.65    0.49
  -4 -14  -3    0.83    0.40
   4  14   3    0.85    0.34
   4  14   3    1.64    0.32
  -5 -14  -3    3.52    0.52
   5  14   3    3.25    0.46
   5  14   3    3.35    0.43
   6  14   3    0.45    0.33
   6  14   3    0.16    0.24
   7  14   3    0.65    0.36
   7  14   3    0.64    0.27
   8  14   3    0.14    0.27
   8  14   3    0.16    0.36
  -9 -14  -3    1.64    0.55
   9  14   3    1.02    0.43
 -10 -14  -3    0.97    0.49
  10  14   3   -0.36    0.43
 -11 -14  -3    0.28    0.55
  11  14   3   -0.16    0.51
  11  14   3   -0.06    0.53
  11  14   3    0.23    0.27
   1  15   3    0.29    0.31
   1  15   3    0.63    0.60
   2  15   3    0.70    0.32
   2  15   3    0.41    0.52
  -3 -15  -3   -0.70    0.45
   3  15   3    0.76    0.34
   3  15   3   -0.17    0.48
  -4 -15  -3    0.19    0.46
   4  15   3    0.17    0.36
   4  15   3    0.58    0.50
  -5 -15  -3    2.36    0.54
   5  15   3    2.12    0.45
   5  15   3    1.90    0.35
   5  15   3    1.47    0.48
  -6 -15  -3    1.28    0.55
   6  15   3   -0.63    0.40
   6  15   3    0.32    0.29
  -7 -15  -3   -0.33    0.51
   7  15   3    1.04    0.46
   7  15   3    0.68    0.31
   7  15   3    0.39    0.42
  -8 -15  -3    0.26    0.47
   8  15   3   -0.15    0.31
   8  15   3    0.81    0.45
   8  15   3   -0.89    0.47
  -9 -15  -3   -0.28    0.51
   9  15   3    0.58    0.48
   9  15   3    1.65    0.50
 -10 -15  -3   -0.88    0.55
  10  15   3   -0.26    0.48
  10  15   3   -0.01    0.53
   4  16   3    1.32    0.39
   5  16   3    0.29    0.35
   6  16   3    1.60    0.37
   6  16   3    1.50    0.51
   7  16   3    0.47    0.36
   7  16   3    0.45    0.50
   8  16   3    0.20    0.53
   8  16   3    0.34    0.38
   7  15  -4    7.05    0.99
   6  15  -4    3.16    0.49
   6  15  -4    3.57    0.62
   5  15  -4    3.01    0.57
   4  15  -4    0.66    0.51
   3  15  -4    8.78    0.95
   2  15  -4   -0.20    0.57
   9  14  -4    0.77    0.51
   9  14  -4    0.86    0.32
   8  14  -4    1.53    0.28
   8  14  -4    2.12    0.50
   7  14  -4    0.24    0.19
   7  14  -4    0.23    0.46
   6  14  -4    2.81    0.57
   5  14  -4    0.25    0.30
   5  14  -4    0.30    0.43
   4  14  -4    4.86    0.62
   4  14  -4    4.02    0.48
   3  14  -4    0.38    0.42
  -3 -14   4    0.50    0.50
   2  14  -4    3.69    0.58
  -2 -14   4    2.43    0.57
   1  14  -4   -0.23    0.43
  -1 -14   4    0.50    0.49
   0  14  -4    0.43    0.46
  -1  14  -4    0.44    0.54
  -1  14  -4   -0.07    0.24
  10  13  -4    0.48    0.31
 -10 -13   4    1.58    0.53
   9  13  -4    6.76    0.77
  -9 -13   4    6.10    0.84
   8  13  -4    0.13    0.22
   8  13  -4   -0.22    0.37
  -8 -13   4    0.53    0.40
   7  13  -4    1.12    0.21
   7  13  -4    0.88    0.42
   6  13  -4    0.01    0.14
   6  13  -4    0.19    0.38
   5  13  -4   -0.35    0.35
   5  13  -4    0.21    0.12
   4  13  -4    1.37    0.28
   4  13  -4    1.78    0.43
  -4 -13   4    2.38    0.45
   3  13  -4    0.27    0.35
   3  13  -4    0.12    0.19
  -3 -13   4    0.00    0.36
   2  13  -4    1.04    0.40
  -2 -13   4    1.04    0.40
   1  13  -4    0.47    0.43
  -1 -13   4    1.17    0.42
   0 -13   4    1.32    0.41
  -1  13  -4    0.16    0.42
   1 -13   4   -0.09    0.38
  -2  13  -4    0.51    0.45
  -2  13  -4   -0.01    0.27
  -3  13  -4    0.08    0.29
  11  12  -4   -0.02    0.30
  11  12  -4    0.17    0.45
 -11 -12   4    1.28    0.51
  10  12  -4   -0.13    0.26
  10  12  -4    0.16    0.40
 -10 -12   4    0.54    0.45
   9  12  -4    3.94    0.51
  -9 -12   4    3.17    0.49
   8  12  -4    0.72    0.20
   8  12  -4    0.63    0.37
  -8 -12   4    0.97    0.36
   7  12  -4    2.60    0.34
   7  12  -4    2.39    0.48
   6  12  -4    0.24    0.15
   6  12  -4    0.50    0.32
  -6 -12   4    0.23    0.35
   5  12  -4    0.38    0.29
   5  12  -4    0.44    0.13
  -5 -12   4   -0.58    0.29
   4  12  -4    0.26    0.11
   4  12  -4    0.76    0.27
  -4 -12   4   -0.05    0.31
   3  12  -4    8.32    0.50
   3  12  -4   10.65    0.74
  -3 -12   4   11.02    0.76
   2  12  -4    3.25    0.27
   2  12  -4    4.03    0.56
  -2 -12   4    3.33    0.46
   1  12  -4    0.16    0.30
  -1 -12   4    0.31    0.34
   0  12  -4    6.00    0.70
   0 -12   4    6.27    0.64
  -1  12  -4    0.28    0.36
  -2  12  -4    0.92    0.39
  -3  12  -4    0.67    0.28
  -3  12  -4    0.77    0.39
  -4  12  -4    0.27    0.29
  12  11  -4    1.16    0.38
  12  11  -4    1.88    0.47
  11  11  -4    0.39    0.28
  11  11  -4    0.31    0.37
 -11 -11   4    1.56    0.45
  10  11  -4    2.06    0.33
  10  11  -4    3.03    0.46
 -10 -11   4    2.52    0.47
   9  11  -4   -0.27    0.30
  -9 -11   4    0.17    0.30
   8  11  -4    1.21    0.24
   8  11  -4    0.92    0.36
  -8 -11   4    1.05    0.32
   7  11  -4    0.83    0.19
   7  11  -4    0.96    0.29
  -7 -11   4    0.15    0.31
   6  11  -4    1.17    0.18
   6  11  -4    1.56    0.31
  -6 -11   4    0.68    0.33
   5  11  -4    0.33    0.31
   5  11  -4    0.21    0.13
  -5 -11   4   -0.15    0.26
   4  11  -4    3.76    0.46
   4  11  -4    3.25    0.25
  -4 -11   4    3.75    0.44
   3  11  -4    2.39    0.20
   3  11  -4    2.31    0.38
  -3 -11   4    2.44    0.38
   2  11  -4    5.16    0.26
   2  11  -4    5.08    0.55
   2  11  -4    5.78    0.26
   2  11  -4    5.92    0.34
  -2 -11   4    6.97    0.57
   1  11  -4    1.76    0.36
  -1 -11   4    1.43    0.31
   0  11  -4    3.93    0.50
   0 -11   4    3.94    0.49
  -1  11  -4    2.53    0.19
  -1  11  -4    4.13    0.52
   1 -11   4    3.78    0.46
  -2  11  -4    1.17    0.37
  -2  11  -4    1.28    0.15
   2 -11   4    1.37    0.29
  -3  11  -4   -0.04    0.31
  -3  11  -4   -0.04    0.16
  -4  11  -4    1.23    0.23
  -4  11  -4    1.23    0.40
  -4  11  -4    1.32    0.28
  -5  11  -4    0.09    0.42
  -5  11  -4    1.10    0.30
  -6  11  -4    1.85    0.37
  -6  11  -4    1.47    0.50
  12  10  -4    0.70    0.38
  12  10  -4    0.69    0.33
 -12 -10   4    1.83    0.56
  11  10  -4    0.32    0.33
  11  10  -4    0.36    0.28
 -11 -10   4    0.46    0.35
  10  10  -4    0.49    0.32
  10  10  -4    0.57    0.24
 -10 -10   4    1.18    0.35
 -10 -10   4    0.94    0.34
   9  10  -4    8.21    0.68
   9  10  -4    9.57    0.58
  -9 -10   4    7.77    0.65
   8  10  -4    1.56    0.33
   8  10  -4    1.28    0.23
  -8 -10   4    1.31    0.30
   7  10  -4    2.38    0.31
   7  10  -4    2.64    0.42
  -7 -10   4    2.34    0.38
   6  10  -4    3.87    0.45
   6  10  -4    3.80    0.30
  -6 -10   4    3.41    0.50
   5  10  -4   17.29    0.87
   5  10  -4   17.40    0.68
  -5 -10   4   17.13    0.88
   4  10  -4    1.54    0.17
   4  10  -4    1.91    0.34
  -4 -10   4    1.41    0.28
   3  10  -4    2.44    0.21
   3  10  -4    2.70    0.39
  -3 -10   4    2.36    0.35
   2  10  -4   16.90    0.87
   2  10  -4   16.46    0.61
  -2 -10   4   18.25    0.85
   1  10  -4    4.36    0.23
   1  10  -4    4.19    0.22
  -1 -10   4    4.73    0.46
   0  10  -4    1.21    0.15
   0 -10   4    1.71    0.28
  -1  10  -4    0.33    0.24
  -1  10  -4    0.76    0.11
   1 -10   4    1.24    0.26
  -2  10  -4    6.21    0.34
  -2  10  -4    8.48    0.63
   2 -10   4    8.00    0.70
   2 -10   4    7.63    0.51
  -3  10  -4    3.90    0.54
   3 -10   4    3.09    0.47
  -4  10  -4    1.07    0.32
  -4  10  -4    0.99    0.36
  -4  10  -4    1.38    0.21
  -5  10  -4    1.78    0.38
  -5  10  -4    1.08    0.25
  -5  10  -4    0.77    0.26
  -6  10  -4   -0.10    0.24
  -6  10  -4   -0.02    0.38
  -7  10  -4    3.08    0.54
  -7  10  -4    3.92    0.51
  12   9  -4    1.82    0.35
  12   9  -4    1.23    0.32
 -12  -9   4    2.33    0.51
  11   9  -4    0.26    0.26
  11   9  -4    0.15    0.28
 -11  -9   4    0.70    0.34
  10   9  -4    3.33    0.40
  10   9  -4    2.87    0.40
 -10  -9   4    3.49    0.51
 -10  -9   4    3.94    0.46
   9   9  -4    0.75    0.29
   9   9  -4    1.13    0.24
  -9  -9   4    0.87    0.27
  -9  -9   4    0.89    0.30
  -9  -9   4    0.21    0.31
   8   9  -4    3.09    0.35
   8   9  -4    3.30    0.44
  -8  -9   4    2.29    0.37
  -8  -9   4    3.06    0.39
   7   9  -4    1.32    0.27
   7   9  -4    1.12    0.18
  -7  -9   4    0.48    0.26
   6   9  -4   15.50    0.78
   6   9  -4   16.18    0.67
   6   9  -4   15.69    0.81
  -6  -9   4   15.56    0.82
   5   9  -4    4.87    0.51
   5   9  -4    5.70    0.50
   5   9  -4    5.48    0.33
  -5  -9   4    5.11    0.49
   4   9  -4    5.87    0.47
   4   9  -4    6.30    0.32
  -4  -9   4    5.41    0.48
   3   9  -4    3.70    0.23
   3   9  -4    3.61    0.38
  -3  -9   4    3.18    0.38
   2   9  -4    0.03    0.08
   2   9  -4   -0.02    0.14
  -2  -9   4    0.08    0.16
   1   9  -4    1.33    0.24
   1   9  -4    1.41    0.17
  -1  -9   4    1.32    0.23
   0   9  -4    0.66    0.25
   0   9  -4    0.62    0.10
   0   9  -4    0.73    0.18
   0  -9   4    0.59    0.21
  -1   9  -4    3.84    0.44
  -1   9  -4    3.21    0.21
   1  -9   4    3.62    0.37
  -2   9  -4   11.01    0.65
  -2   9  -4   10.98    0.45
   2  -9   4   11.71    0.73
   2  -9   4   10.41    0.56
  -3   9  -4    0.55    0.15
  -3   9  -4    0.58    0.26
   3  -9   4    0.30    0.32
   3  -9   4    0.43    0.19
  -4   9  -4    1.92    0.34
  -4   9  -4    1.81    0.22
   4  -9   4    1.64    0.40
  -5   9  -4    0.45    0.19
  -5   9  -4    0.30    0.27
   5  -9   4    0.53    0.41
  -6   9  -4    2.43    0.35
  -6   9  -4    2.24    0.31
  -7   9  -4    0.83    0.28
  -7   9  -4    0.86    0.32
  -8   9  -4    0.13    0.27
  12   8  -4    0.29    0.29
  12   8  -4    0.12    0.27
 -12  -8   4   -0.01    0.38
  11   8  -4    0.16    0.23
  11   8  -4   -0.20    0.24
 -11  -8   4    0.14    0.38
  10   8  -4    1.53    0.27
  10   8  -4    1.77    0.29
 -10  -8   4    1.39    0.34
 -10  -8   4    1.54    0.28
 -10  -8   4    0.85    0.39
   9   8  -4    0.16    0.23
   9   8  -4    0.41    0.20
  -9  -8   4    0.48    0.23
  -9  -8   4   -0.27    0.27
  -9  -8   4    0.18    0.26
   8   8  -4    4.95    0.46
   8   8  -4    4.74    0.39
  -8  -8   4    5.36    0.46
  -8  -8   4    3.82    0.50
  -8  -8   4    5.57    0.43
   7   8  -4   11.07    0.54
   7   8  -4   10.46    0.61
   7   8  -4   10.68    0.64
  -7  -8   4   10.00    0.66
  -7  -8   4   11.36    0.58
  -7  -8   4   11.53    0.59
   6   8  -4    3.84    0.40
   6   8  -4    3.45    0.29
  -6  -8   4    3.08    0.40
   5   8  -4    1.68    0.27
   5   8  -4    1.46    0.18
  -5  -8   4    1.33    0.25
   4   8  -4    9.29    0.43
   4   8  -4    9.63    0.55
  -4  -8   4   10.19    0.57
   3   8  -4   18.78    0.81
   3   8  -4   18.38    0.68
  -3  -8   4   17.93    0.82
   2   8  -4    3.66    0.32
   2   8  -4    3.15    0.20
  -2  -8   4    3.32    0.34
   1   8  -4   11.46    0.56
   1   8  -4   11.49    0.45
  -1  -8   4   11.62    0.58
   0   8  -4    3.67    0.21
   0   8  -4    3.95    0.32
   0  -8   4    3.32    0.33
  -1   8  -4    7.62    0.42
  -1   8  -4    7.17    0.32
   1  -8   4    6.96    0.43
  -2   8  -4    2.47    0.32
  -2   8  -4    2.20    0.26
  -2   8  -4    2.42    0.20
   2  -8   4    2.48    0.34
  -3   8  -4    3.60    0.42
   3  -8   4    3.23    0.49
   3  -8   4    2.92    0.30
  -4   8  -4    0.15    0.21
  -4   8  -4    0.02    0.12
   4  -8   4    0.10    0.28
  -5   8  -4    1.80    0.32
  -5   8  -4    1.87    0.24
  -5   8  -4    2.10    0.27
   5  -8   4    1.42    0.39
  -6   8  -4    4.39    0.40
  -6   8  -4    4.42    0.42
  -6   8  -4    4.66    0.50
   6  -8   4    5.80    0.80
  -7   8  -4   -0.12    0.28
  -7   8  -4    0.80    0.25
  -7   8  -4    0.60    0.25
  -8   8  -4    1.71    0.40
  -8   8  -4    0.54    0.36
  -8   8  -4    1.55    0.35
  -9   8  -4    1.28    0.35
  12   7  -4    5.04    0.58
  11   7  -4    1.12    0.23
  11   7  -4    0.72    0.23
 -11  -7   4    1.64    0.44
 -11  -7   4    1.25    0.36
  10   7  -4    0.61    0.22
  10   7  -4    0.70    0.22
 -10  -7   4    0.91    0.37
 -10  -7   4    1.29    0.36
 -10  -7   4    0.90    0.30
   9   7  -4    0.60    0.21
   9   7  -4    0.43    0.18
  -9  -7   4    0.30    0.18
  -9  -7   4    0.25    0.26
  -9  -7   4    0.38    0.22
   8   7  -4    7.11    0.44
   8   7  -4    6.36    0.45
  -8  -7   4    6.60    0.44
  -8  -7   4    5.95    0.47
  -8  -7   4    5.90    0.53
   7   7  -4    0.18    0.17
   7   7  -4    0.21    0.13
  -7  -7   4    0.11    0.20
  -7  -7   4    0.35    0.16
  -7  -7   4    0.15    0.15
   6   7  -4    0.04    0.10
   6   7  -4    0.15    0.16
  -6  -7   4   -0.08    0.15
  -6  -7   4   -0.06    0.13
   5   7  -4   12.68    0.54
   5   7  -4   12.93    0.64
  -5  -7   4   12.15    0.65
   4   7  -4   15.62    0.61
   4   7  -4   14.96    0.71
  -4  -7   4   15.12    0.72
   3   7  -4    1.30    0.22
   3   7  -4    1.19    0.16
  -3  -7   4    1.23    0.20
   2   7  -4    2.90    0.20
   2   7  -4    3.36    0.29
  -2  -7   4    3.00    0.29
   1   7  -4    2.23    0.24
  -1  -7   4    2.40    0.27
   0   7  -4    0.06    0.11
   0  -7   4   -0.02    0.11
  -1   7  -4   17.48    0.64
  -1   7  -4   18.50    0.72
  -2   7  -4    0.10    0.10
  -2   7  -4    0.04    0.07
   2  -7   4   -0.02    0.14
   2  -7   4    0.08    0.12
  -3   7  -4    0.50    0.13
   3  -7   4    0.28    0.21
   3  -7   4    0.17    0.14
  -4   7  -4    4.67    0.45
  -4   7  -4    3.54    0.28
   4  -7   4    4.17    0.49
  -5   7  -4    4.35    0.41
  -5   7  -4    3.86    0.32
   5  -7   4    4.54    0.55
  -6   7  -4    0.11    0.21
  -6   7  -4   -0.07    0.14
  -6   7  -4   -0.03    0.16
   6  -7   4    0.04    0.33
  -7   7  -4    4.95    0.42
  -7   7  -4    4.44    0.45
  -7   7  -4    4.88    0.49
   7  -7   4    5.32    0.73
  -8   7  -4   -0.22    0.25
  -8   7  -4   -0.14    0.27
  -8   7  -4    0.42    0.26
   8  -7   4   -0.42    0.46
  -9   7  -4   -0.34    0.36
  -9   7  -4    0.39    0.27
  -9   7  -4    0.11    0.32
  12   6  -4    3.56    0.43
  11   6  -4    1.80    0.27
  11   6  -4    1.84    0.22
 -11  -6   4    2.97    0.50
 -11  -6   4    3.14    0.41
  10   6  -4    0.13    0.20
  10   6  -4    0.72    0.18
 -10  -6   4    0.38    0.28
 -10  -6   4    1.08    0.32
 -10  -6   4    0.77    0.30
   9   6  -4    5.50    0.44
   9   6  -4    5.68    0.40
  -9  -6   4    4.97    0.54
  -9  -6   4    5.50    0.49
  -9  -6   4    5.60    0.50
   8   6  -4   43.07    1.51
   8   6  -4   44.19    1.56
   8   6  -4   42.98    1.61
  -8  -6   4   41.37    1.64
  -8  -6   4   44.30    1.59
  -8  -6   4   41.96    1.49
   7   6  -4    0.36    0.17
   7   6  -4    0.59    0.15
  -7  -6   4    0.33    0.21
  -7  -6   4    0.52    0.15
  -7  -6   4    0.41    0.15
   6   6  -4    1.75    0.22
   6   6  -4    2.07    0.29
  -6  -6   4    1.58    0.24
  -6  -6   4    1.63    0.22
   5   6  -4    7.11    0.37
   5   6  -4    6.54    0.43
  -5  -6   4    7.01    0.45
   4   6  -4   16.68    0.65
   4   6  -4   16.85    0.73
   3   6  -4   25.42    0.88
   3   6  -4   24.19    0.96
  -3  -6   4   24.74    0.97
   2   6  -4    8.73    0.46
   2   6  -4    8.96    0.38
  -2  -6   4    8.85    0.47
   1   6  -4   10.68    0.51
  -1  -6   4   10.69    0.51
   0   6  -4    4.07    0.28
  -1   6  -4    0.22    0.07
  -1   6  -4    0.05    0.10
   1  -6   4    0.20    0.10
  -2   6  -4    6.93    0.35
  -2   6  -4    6.69    0.31
   2  -6   4    6.81    0.36
   2  -6   4    6.75    0.46
  -3   6  -4    0.70    0.12
   3  -6   4    0.73    0.15
   3  -6   4    0.65    0.20
  -4   6  -4   78.62    2.56
   4  -6   4   80.57    2.77
  -5   6  -4   11.61    0.63
   5  -6   4   11.48    0.73
  -6   6  -4    3.52    0.34
  -6   6  -4    4.17    0.33
  -6   6  -4    4.95    0.38
   6  -6   4    4.49    0.54
  -7   6  -4   -0.13    0.18
  -7   6  -4   -0.07    0.18
  -7   6  -4    0.12    0.16
   7  -6   4   -0.06    0.12
   7  -6   4   -0.10    0.29
  -8   6  -4    1.45    0.31
  -8   6  -4    0.99    0.27
  -8   6  -4    1.68    0.31
   8  -6   4    1.87    0.30
   8  -6   4    0.87    0.50
  -9   6  -4   -0.19    0.26
  -9   6  -4    0.32    0.33
  -9   6  -4   -0.30    0.24
   9  -6   4    0.58    0.28
   9  -6   4   -0.79    0.49
 -10   6  -4    0.80    0.34
  10  -6   4    1.01    0.37
  12   5  -4   -0.36    0.26
 -12  -5   4    1.45    0.49
  11   5  -4    0.68    0.25
 -11  -5   4   -0.05    0.35
 -11  -5   4    0.40    0.29
  10   5  -4    0.62    0.21
  10   5  -4    0.31    0.13
 -10  -5   4    0.65    0.30
 -10  -5   4    0.67    0.28
 -10  -5   4    0.57    0.29
   9   5  -4    8.88    0.54
   9   5  -4    8.18    0.43
  -9  -5   4    8.58    0.61
  -9  -5   4    8.40    0.55
  -9  -5   4    9.24    0.58
   8   5  -4    2.48    0.31
   8   5  -4    1.67    0.28
  -8  -5   4    2.17    0.32
  -8  -5   4    2.56    0.34
  -8  -5   4    2.45    0.37
   7   5  -4    1.13    0.18
   7   5  -4    0.89    0.20
  -7  -5   4    0.80    0.18
  -7  -5   4    0.78    0.21
  -7  -5   4    0.80    0.15
   6   5  -4    5.59    0.39
   6   5  -4    4.66    0.32
  -6  -5   4    4.62    0.38
  -6  -5   4    5.36    0.35
  -6  -5   4    4.91    0.29
   5   5  -4   28.26    1.01
   5   5  -4   27.29    1.06
  -5  -5   4   26.94    1.01
   4   5  -4   21.60    0.80
   4   5  -4   21.44    0.87
  -4  -5   4   21.93    0.88
   3   5  -4   13.27    0.51
   3   5  -4   12.71    0.58
  -3  -5   4   12.47    0.58
   2   5  -4   19.17    0.76
   2   5  -4   18.89    0.69
  -2  -5   4   19.03    0.76
   1   5  -4   13.78    0.59
   0   5  -4    4.32    0.28
   0  -5   4    4.04    0.27
  -1   5  -4   69.71    2.24
   1  -5   4   70.31    2.26
   1  -5   4   68.50    2.34
  -2   5  -4    2.41    0.19
  -2   5  -4    2.23    0.16
   2  -5   4    2.31    0.28
   2  -5   4    2.42    0.21
  -3   5  -4    5.50    0.31
  -3   5  -4    6.36    0.30
   3  -5   4    6.11    0.32
  -4   5  -4    5.09    0.30
  -4   5  -4    5.38    0.26
   4  -5   4    5.73    0.43
  -5   5  -4   59.46    1.94
   5  -5   4   53.27    1.85
   5  -5   4   62.36    2.14
  -6   5  -4    5.39    0.41
  -6   5  -4    5.31    0.35
  -6   5  -4    5.32    0.37
   6  -5   4    5.48    0.51
   6  -5   4    5.01    0.38
  -7   5  -4    2.96    0.32
  -7   5  -4    2.69    0.32
  -7   5  -4    2.74    0.29
   7  -5   4    3.20    0.46
   7  -5   4    3.60    0.35
  -8   5  -4   -0.04    0.16
  -8   5  -4    0.03    0.17
  -8   5  -4   -0.07    0.19
   8  -5   4    0.11    0.20
   8  -5   4   -0.14    0.34
  -9   5  -4    1.46    0.28
  -9   5  -4    1.25    0.31
  -9   5  -4    1.19    0.23
   9  -5   4    0.66    0.40
   9  -5   4    1.41    0.30
  10  -5   4    0.26    0.61
  10  -5   4    2.04    0.39
 -11   5  -4    0.15    0.31
  11  -5   4    0.06    0.38
  12   4  -4   -0.23    0.24
 -12  -4   4    0.24    0.45
 -12  -4   4    0.11    0.34
  11   4  -4    0.31    0.24
 -11  -4   4    0.04    0.26
 -11  -4   4    1.05    0.38
 -11  -4   4    0.17    0.29
  10   4  -4    2.03    0.28
 -10  -4   4    2.02    0.33
 -10  -4   4    2.08    0.35
 -10  -4   4    2.15    0.35
 -10  -4   4    1.76    0.36
   9   4  -4    0.49    0.14
   9   4  -4    0.74    0.21
  -9  -4   4    1.00    0.25
  -9  -4   4    0.51    0.24
  -9  -4   4    0.67    0.25
  -9  -4   4    0.76    0.26
   8   4  -4   21.57    0.90
   8   4  -4   21.92    0.93
  -8  -4   4   21.67    0.91
  -8  -4   4   20.71    0.94
  -8  -4   4   21.57    0.93
   7   4  -4    2.91    0.28
   7   4  -4    2.93    0.31
  -7  -4   4    3.31    0.35
  -7  -4   4    2.95    0.33
  -7  -4   4    3.66    0.31
   6   4  -4    1.06    0.20
   6   4  -4    0.97    0.16
  -6  -4   4    0.99    0.18
   5   4  -4   60.62    1.97
   5   4  -4   57.83    2.01
  -5  -4   4   59.13    1.89
  -5  -4   4   58.67    1.97
  -5  -4   4   58.63    2.02
   4   4  -4    5.33    0.29
   4   4  -4    5.35    0.33
  -4  -4   4    5.63    0.31
  -4  -4   4    5.16    0.34
   3   4  -4   13.45    0.61
   3   4  -4   13.70    0.54
  -3  -4   4   13.42    0.60
   2   4  -4   22.61    0.79
   1   4  -4    2.28    0.19
   0   4  -4   39.59    1.35
   0  -4   4   40.18    1.36
  -1   4  -4    0.32    0.09
  -1   4  -4    0.40    0.06
   1  -4   4    0.45    0.11
   1  -4   4    0.34    0.12
  -2   4  -4    1.43    0.15
  -2   4  -4    2.13    0.17
   2  -4   4    1.92    0.23
   2  -4   4    2.10    0.18
  -3   4  -4   19.07    0.69
  -3   4  -4   19.09    0.68
   3  -4   4   17.52    0.68
   3  -4   4   19.78    0.81
  -4   4  -4   28.51    0.98
  -4   4  -4   29.32    1.03
   4  -4   4   29.45    0.97
   4  -4   4   30.03    1.16
  -5   4  -4   -0.04    0.08
   5  -4   4    0.17    0.19
   5  -4   4   -0.08    0.09
  -6   4  -4    0.66    0.15
   6  -4   4    0.62    0.15
   6  -4   4    1.08    0.27
  -7   4  -4   31.75    1.17
  -7   4  -4   32.56    1.23
  -7   4  -4   32.64    1.23
   7  -4   4   34.41    1.41
   7  -4   4   34.39    1.25
  -8   4  -4    0.13    0.17
  -8   4  -4   -0.16    0.15
  -8   4  -4   -0.08    0.14
   8  -4   4    0.05    0.16
   8  -4   4    0.02    0.31
  -9   4  -4    3.07    0.28
  -9   4  -4    3.15    0.44
  -9   4  -4    3.02    0.36
   9  -4   4    3.98    0.57
   9  -4   4    3.91    0.42
 -10   4  -4    0.72    0.34
 -10   4  -4    0.34    0.25
  10  -4   4    0.75    0.26
  10  -4   4    0.60    0.45
  11  -4   4    1.01    0.51
  12   3  -4   -0.34    0.25
 -12  -3   4    0.11    0.33
 -12  -3   4    1.29    0.46
  11   3  -4    1.33    0.28
 -11  -3   4    1.52    0.34
 -11  -3   4    1.59    0.37
 -11  -3   4    2.27    0.33
  10   3  -4    0.25    0.19
 -10  -3   4    0.19    0.26
 -10  -3   4    0.12    0.23
 -10  -3   4   -0.28    0.26
 -10  -3   4    0.31    0.27
   9   3  -4   12.01    0.64
  -9  -3   4   12.77    0.68
  -9  -3   4   11.53    0.64
  -9  -3   4   11.79    0.69
  -9  -3   4   11.91    0.61
   8   3  -4    0.59    0.20
   8   3  -4    0.78    0.17
  -8  -3   4    0.12    0.19
  -8  -3   4    0.40    0.22
  -8  -3   4    0.59    0.21
  -8  -3   4    0.45    0.18
   7   3  -4    4.48    0.36
   7   3  -4    5.24    0.35
  -7  -3   4    4.83    0.36
  -7  -3   4    5.16    0.38
  -7  -3   4    4.59    0.39
   6   3  -4    1.18    0.17
   6   3  -4    1.89    0.25
  -6  -3   4    1.67    0.27
  -6  -3   4    1.84    0.26
  -6  -3   4    1.89    0.26
  -6  -3   4    2.03    0.24
   5   3  -4   43.59    1.45
   5   3  -4   41.66    1.47
  -5  -3   4   42.18    1.46
  -5  -3   4   42.16    1.46
  -5  -3   4   40.72    1.48
   4   3  -4    3.20    0.25
   4   3  -4    2.85    0.21
  -4  -3   4    3.00    0.25
  -4  -3   4    2.83    0.23
   3   3  -4   89.61    2.77
   3   3  -4   84.94    2.81
   2   3  -4   37.02    1.28
   2   3  -4   38.66    1.25
  -2  -3   4   36.74    1.29
   1   3  -4   32.18    1.11
  -1  -3   4   31.88    1.11
   0   3  -4   22.39    0.79
   0  -3   4   21.25    0.80
   0  -3   4   22.00    0.80
  -1   3  -4  138.75    3.98
  -1   3  -4  129.43    4.03
   1  -3   4  125.24    4.08
   1  -3   4  122.87    4.03
  -2   3  -4   30.06    1.06
  -2   3  -4   31.85    1.08
   2  -3   4   32.04    1.09
   2  -3   4   31.71    1.16
   2  -3   4   33.58    1.04
  -3   3  -4   20.06    0.70
  -3   3  -4   18.85    0.72
   3  -3   4   19.94    0.71
   3  -3   4   20.04    0.82
   3  -3   4   18.73    0.68
  -4   3  -4    4.46    0.24
   4  -3   4    4.55    0.24
   4  -3   4    4.43    0.34
  -5   3  -4    8.41    0.40
  -5   3  -4    8.07    0.35
   5  -3   4    8.20    0.49
   5  -3   4    8.87    0.42
  -6   3  -4    0.36    0.11
   6  -3   4    0.09    0.10
   6  -3   4    0.25    0.20
  -7   3  -4   36.41    1.34
  -7   3  -4   37.33    1.36
   7  -3   4   39.01    1.37
   7  -3   4   38.43    1.51
  -8   3  -4   27.68    1.06
  -8   3  -4   27.62    1.08
  -8   3  -4   25.70    0.95
   8  -3   4   28.04    1.23
   8  -3   4   29.03    1.10
  -9   3  -4    0.03    0.11
  -9   3  -4   -0.08    0.17
  -9   3  -4   -0.07    0.20
   9  -3   4    0.13    0.28
   9  -3   4    0.33    0.18
 -10   3  -4    0.82    0.29
 -10   3  -4    0.24    0.22
  10  -3   4    0.66    0.23
  10  -3   4    0.01    0.37
 -11   3  -4    0.24    0.25
  11  -3   4    0.49    0.49
  11  -3   4    0.52    0.26
  12  -3   4    0.72    0.68
  12  -3   4    0.99    0.38
  12   2  -4   -0.30    0.26
 -12  -2   4   -0.59    0.33
 -11  -2   4    1.70    0.37
 -11  -2   4    1.59    0.31
 -11  -2   4    1.21    0.33
  10   2  -4    0.50    0.21
 -10  -2   4    0.52    0.26
 -10  -2   4    0.40    0.23
 -10  -2   4    0.07    0.28
 -10  -2   4    0.96    0.28
   9   2  -4    8.59    0.53
  -9  -2   4    7.66    0.55
  -9  -2   4    8.42    0.50
  -9  -2   4    8.12    0.54
  -9  -2   4    8.20    0.57
   8   2  -4    7.08    0.45
   8   2  -4    7.40    0.45
   8   2  -4    5.87    0.29
  -8  -2   4    6.83    0.45
  -8  -2   4    7.06    0.48
  -8  -2   4    7.38    0.48
   7   2  -4    2.46    0.27
   7   2  -4    2.75    0.29
  -7  -2   4    2.75    0.31
  -7  -2   4    2.28    0.31
  -7  -2   4    2.95    0.32
  -7  -2   4    2.85    0.32
   6   2  -4   46.64    1.61
   6   2  -4   47.39    1.61
  -6  -2   4   45.83    1.63
  -6  -2   4   46.88    1.63
  -6  -2   4   44.71    1.62
  -6  -2   4   47.50    1.63
   5   2  -4    3.85    0.26
   5   2  -4    3.60    0.27
  -5  -2   4    3.18    0.28
  -5  -2   4    3.71    0.31
  -5  -2   4    4.15    0.28
  -5  -2   4    3.53    0.28
   4   2  -4   19.75    0.77
   4   2  -4   19.79    0.75
  -4  -2   4   19.76    0.76
  -4  -2   4   20.50    0.78
   3   2  -4   32.00    1.13
   3   2  -4   32.08    1.11
  -3  -2   4   33.32    1.14
  -3  -2   4   33.18    1.12
  -3  -2   4   32.39    1.14
   2   2  -4   90.98    2.89
   2   2  -4   93.63    2.87
  -2  -2   4   89.88    2.89
  -2  -2   4   88.92    2.82
   1   2  -4    2.85    0.19
  -1  -2   4    2.82    0.19
  -1  -2   4    2.36    0.16
   0   2  -4   34.61    1.16
   0   2  -4   36.82    1.16
   0  -2   4   33.61    1.16
   0  -2   4   31.91    1.15
  -1   2  -4   21.90    0.77
  -1   2  -4   23.58    0.75
  -1   2  -4   21.55    0.79
   1  -2   4   19.56    0.76
  -2   2  -4   34.48    1.10
  -2   2  -4   32.81    1.18
  -2   2  -4   30.08    1.10
  -2   2  -4   34.09    1.13
   2  -2   4   36.89    1.11
   2  -2   4   33.79    1.13
  -3   2  -4    8.97    0.38
  -3   2  -4    8.91    0.39
   3  -2   4    9.46    0.46
   3  -2   4    9.82    0.38
  -4   2  -4    3.00    0.26
  -4   2  -4    2.60    0.19
   4  -2   4    2.18    0.21
  -5   2  -4    0.54    0.13
  -5   2  -4    1.10    0.15
   5  -2   4    0.85    0.13
   5  -2   4    0.49    0.15
  -6   2  -4    4.46    0.26
  -6   2  -4    4.29    0.34
   6  -2   4    3.60    0.36
   6  -2   4    4.00    0.28
  -7   2  -4    5.30    0.32
  -7   2  -4    5.71    0.30
  -7   2  -4    5.48    0.36
   7  -2   4    5.27    0.45
   7  -2   4    5.36    0.35
  -8   2  -4    0.01    0.14
  -8   2  -4   -0.02    0.12
  -8   2  -4   -0.06    0.14
   8  -2   4    0.02    0.23
   8  -2   4   -0.32    0.15
  -9   2  -4   11.07    0.61
  -9   2  -4   10.26    0.54
   9  -2   4   11.26    0.75
 -10   2  -4    2.04    0.31
 -10   2  -4    1.34    0.31
  10  -2   4    2.16    0.43
  10  -2   4    1.65    0.27
 -11   2  -4    0.83    0.27
  11  -2   4    0.87    0.47
  11  -2   4    0.96    0.26
 -12   2  -4    0.17    0.28
  12  -2   4    0.35    0.31
  12  -2   4    0.09    0.55
 -12  -1   4   -0.13    0.35
  11   1  -4    3.11    0.39
 -11  -1   4    2.90    0.41
 -11  -1   4    2.81    0.44
 -11  -1   4    2.91    0.41
  10   1  -4    4.44    0.43
 -10  -1   4    3.85    0.48
 -10  -1   4    4.16    0.40
 -10  -1   4    3.46    0.47
   9   1  -4    1.74    0.26
  -9  -1   4    1.71    0.28
  -9  -1   4    1.00    0.27
  -9  -1   4    1.31    0.28
   8   1  -4   45.65    1.63
  -8  -1   4   44.15    1.57
  -8  -1   4   44.15    1.58
  -8  -1   4   45.04    1.66
  -8  -1   4   44.57    1.65
   7   1  -4   24.85    0.87
   7   1  -4   26.37    1.02
   7   1  -4   26.41    0.98
  -7  -1   4   26.15    1.01
  -7  -1   4   27.26    1.05
  -7  -1   4   25.46    1.05
  -7  -1   4   26.42    1.01
   6   1  -4   -0.02    0.11
   6   1  -4    0.01    0.12
  -6  -1   4   -0.06    0.15
  -6  -1   4    0.05    0.13
  -6  -1   4    0.02    0.11
  -6  -1   4    0.05    0.12
   5   1  -4   24.70    0.91
   5   1  -4   23.48    0.90
  -5  -1   4   24.13    0.94
  -5  -1   4   25.53    0.93
  -5  -1   4   24.46    0.94
   4   1  -4    6.75    0.35
   4   1  -4    6.72    0.34
  -4  -1   4    6.94    0.36
  -4  -1   4    7.28    0.36
  -4  -1   4    7.21    0.39
  -4  -1   4    6.95    0.38
   3   1  -4    2.73    0.19
   3   1  -4    3.00    0.21
  -3  -1   4    3.01    0.25
  -3  -1   4    3.37    0.23
  -3  -1   4    2.74    0.21
  -3  -1   4    2.72    0.21
   2   1  -4    2.34    0.17
   2   1  -4    2.26    0.16
  -2  -1   4    2.41    0.18
   1   1  -4   41.12    1.33
   1   1  -4   41.16    1.28
  -1  -1   4   40.33    1.28
  -1  -1   4   36.21    1.32
   0   1  -4  501.98   15.58
   0   1  -4  504.44   15.54
   0   1  -4  556.07   15.83
   0  -1   4  494.93   15.58
   0  -1   4  480.01   15.54
  -1   1  -4    5.44    0.27
  -1   1  -4    6.18    0.27
  -1   1  -4    5.14    0.27
   1  -1   4    5.15    0.27
   1  -1   4    4.92    0.27
   1  -1   4    6.28    0.27
  -2   1  -4    0.11    0.05
  -2   1  -4    0.00    0.05
  -2   1  -4    0.02    0.06
   2  -1   4    0.02    0.04
   2  -1   4    0.05    0.06
   2  -1   4   -0.01    0.05
  -3   1  -4   24.00    0.90
  -3   1  -4   28.25    0.93
  -3   1  -4   26.03    0.98
   3  -1   4   25.95    0.98
   3  -1   4   29.30    0.93
  -4   1  -4   18.85    0.78
  -4   1  -4   18.36    0.71
  -4   1  -4   20.83    0.72
   4  -1   4   19.46    0.79
   4  -1   4   20.15    0.72
  -5   1  -4    2.51    0.20
  -5   1  -4    2.61    0.21
  -5   1  -4    2.52    0.25
   5  -1   4    2.80    0.28
   5  -1   4    2.85    0.21
  -6   1  -4    0.25    0.11
  -6   1  -4    0.44    0.12
  -6   1  -4    0.59    0.12
   6  -1   4    0.43    0.10
   6  -1   4    0.44    0.16
  -7   1  -4    6.82    0.39
  -7   1  -4    7.22    0.35
  -7   1  -4    7.36    0.45
   7  -1   4    6.82    0.39
   7  -1   4    7.17    0.50
  -8   1  -4    0.71    0.20
  -8   1  -4    0.72    0.16
  -8   1  -4    0.56    0.16
   8  -1   4    0.86    0.24
   8  -1   4    0.67    0.15
  -9   1  -4    3.25    0.35
  -9   1  -4    2.97    0.29
  -9   1  -4    3.29    0.26
  -9   1  -4    3.15    0.38
  -9   1  -4    2.74    0.31
   9  -1   4    3.64    0.35
   9  -1   4    3.46    0.47
 -10   1  -4    1.23    0.25
 -10   1  -4    1.75    0.27
 -10   1  -4    1.68    0.24
  10  -1   4    1.84    0.42
  10  -1   4    2.18    0.29
 -11   1  -4    0.18    0.22
  11  -1   4    0.22    0.22
  11  -1   4   -0.08    0.40
 -12   1  -4    0.49    0.28
  12  -1   4    0.89    0.47
  12  -1   4    0.56    0.27
 -13   1  -4    1.73    0.38
  13  -1   4    1.70    0.40
  12   0  -4    0.37    0.35
 -12   0   4    1.65    0.42
  11   0  -4   -0.33    0.25
 -11   0   4   -0.11    0.23
 -11   0   4   -0.29    0.31
  10   0  -4    0.23    0.21
 -10   0   4    0.24    0.23
 -10   0   4    0.14    0.27
 -10   0   4    0.73    0.27
   9   0  -4    4.33    0.41
  -9   0   4    5.14    0.53
  -9   0   4    4.81    0.40
  -9   0   4    5.10    0.47
  -9   0   4    3.95    0.42
  -8   0   4   11.29    0.57
  -8   0   4   11.81    0.65
  -8   0   4   10.53    0.56
  -8   0   4   11.28    0.63
   7   0  -4    2.84    0.29
   7   0  -4    3.07    0.27
  -7   0   4    3.41    0.34
  -7   0   4    3.27    0.31
  -7   0   4    3.07    0.34
   6   0  -4    5.94    0.28
   6   0  -4    6.15    0.37
   6   0  -4    6.35    0.35
  -6   0   4    5.89    0.39
  -6   0   4    6.10    0.39
  -6   0   4    6.26    0.39
   5   0  -4    0.74    0.11
   5   0  -4    0.43    0.11
   5   0  -4    0.37    0.10
  -5   0   4    0.54    0.14
  -5   0   4    0.66    0.17
  -5   0   4    0.34    0.11
  -5   0   4    0.39    0.12
   4   0  -4   12.72    0.51
   4   0  -4   12.27    0.52
  -4   0   4   12.55    0.56
  -4   0   4   12.98    0.57
  -4   0   4   12.82    0.54
  -4   0   4   12.21    0.52
   3   0  -4    4.00    0.23
   3   0  -4    3.40    0.22
  -3   0   4    3.52    0.23
  -3   0   4    3.69    0.26
  -3   0   4    3.45    0.25
   2   0  -4    0.30    0.07
   2   0  -4    0.22    0.08
  -2   0   4    0.14    0.06
  -2   0   4    0.18    0.09
  -2   0   4    0.25    0.12
   1   0  -4    1.48    0.11
   1   0  -4    2.18    0.16
   1   0  -4    1.92    0.13
  -1   0   4    1.62    0.15
  -1   0   4    1.72    0.16
  -1   0   4    1.65    0.11
  -1   0   4    1.46    0.17
   0   0  -4   49.36    1.58
   0   0  -4   46.21    1.53
   0   0  -4   46.86    1.55
   0   0   4   47.97    1.54
   0   0   4   49.61    1.55
   0   0   4   46.35    1.56
  -1   0  -4  334.81   10.37
  -1   0  -4  354.59   10.55
  -1   0  -4  318.95   10.38
   1   0   4  360.65   10.57
   1   0   4  329.30   10.31
   1   0   4  326.04   10.32
  -2   0  -4  213.90    7.10
  -2   0  -4  239.54    7.14
  -2   0  -4  238.84    7.08
   2   0   4  217.78    7.11
   2   0   4  240.99    7.09
  -3   0  -4   15.75    0.59
  -3   0  -4   14.54    0.56
  -3   0  -4   15.40    0.63
   3   0   4   16.28    0.60
   3   0   4   15.26    0.63
  -4   0  -4    1.35    0.19
  -4   0  -4    1.37    0.14
   4   0   4    1.36    0.14
   4   0   4    1.52    0.20
  -5   0  -4   68.18    2.32
  -5   0  -4   71.81    2.26
   5   0   4   68.47    2.26
  -6   0  -4    0.28    0.10
  -6   0  -4    0.37    0.16
   6   0   4    0.55    0.15
   6   0   4    0.28    0.09
  -7   0  -4    1.48    0.20
  -7   0  -4    1.50    0.16
  -7   0  -4    1.60    0.24
   7   0   4    1.58    0.21
   7   0   4    1.30    0.27
  -8   0  -4   21.35    0.92
  -8   0  -4   22.07    0.88
  -8   0  -4   21.66    0.81
  -8   0  -4   21.62    0.73
   8   0   4   21.66    0.88
  -9   0  -4    3.17    0.37
  -9   0  -4    3.25    0.33
  -9   0  -4    3.28    0.28
   9   0   4    3.43    0.47
   9   0   4    2.96    0.33
 -10   0  -4    9.19    0.59
 -10   0  -4    9.73    0.62
 -10   0  -4    9.80    0.52
  10   0   4   10.48    0.70
  10   0   4    9.74    0.57
 -11   0  -4    1.24    0.29
 -11   0  -4    1.36    0.29
 -11   0  -4    1.41    0.25
  11   0   4    2.01    0.40
  11   0   4    1.77    0.29
 -12   0  -4    0.72    0.28
  12   0   4    0.50    0.42
 -13   0  -4    1.99    0.37
  13   0   4    1.37    0.35
  13   0   4    1.10    0.54
  11  -1  -4   -0.34    0.29
 -11   1   4    0.04    0.27
  10  -1  -4   -0.04    0.22
 -10   1   4    0.14    0.30
 -10   1   4    0.16    0.24
   9  -1  -4    0.13    0.18
  -9   1   4    0.00    0.23
  -9   1   4    0.19    0.28
  -9   1   4   -0.08    0.21
   8  -1  -4    3.81    0.36
  -8   1   4    3.20    0.40
  -8   1   4    3.61    0.35
  -8   1   4    3.67    0.44
   7  -1  -4    2.38    0.31
   7  -1  -4    2.08    0.26
  -7   1   4    2.05    0.30
  -7   1   4    1.90    0.28
  -7   1   4    1.94    0.28
  -7   1   4    2.69    0.35
   6  -1  -4   28.17    0.99
   6  -1  -4   25.28    0.92
   6  -1  -4   28.62    1.06
  -6   1   4   28.79    1.08
  -6   1   4   27.71    1.11
  -6   1   4   28.67    1.06
  -6   1   4   27.83    1.01
   5  -1  -4    0.54    0.13
   5  -1  -4    0.56    0.09
   5  -1  -4    0.59    0.12
  -5   1   4    0.61    0.16
  -5   1   4    0.65    0.13
  -5   1   4    0.55    0.17
   4  -1  -4   55.21    1.80
   4  -1  -4   50.60    1.76
   4  -1  -4   55.21    1.77
  -4   1   4   54.11    1.81
  -4   1   4   56.15    1.85
  -4   1   4   54.76    1.86
  -4   1   4   54.10    1.78
   3  -1  -4   10.88    0.46
   3  -1  -4   11.12    0.46
   3  -1  -4   11.31    0.45
  -3   1   4   11.18    0.47
  -3   1   4   10.94    0.51
  -3   1   4   10.69    0.50
   2  -1  -4   32.12    1.10
   2  -1  -4   32.97    1.10
  -2   1   4   33.17    1.14
  -2   1   4   33.27    1.11
  -2   1   4   31.77    1.10
  -2   1   4   32.38    1.15
   1  -1  -4  198.82    6.14
   1  -1  -4  189.13    6.20
   1  -1  -4  193.84    6.13
  -1   1   4  202.01    6.15
  -1   1   4  210.17    6.20
  -1   1   4  202.57    6.18
   0  -1  -4  194.36    6.09
   0  -1  -4  199.12    6.10
   0  -1  -4  188.50    6.14
   0  -1  -4  196.21    6.14
   0   1   4  200.64    6.11
   0   1   4  195.19    6.08
   0   1   4  198.16    6.11
   0   1   4  206.86    6.14
   0   1   4  200.54    6.14
  -1  -1  -4  842.53   26.49
  -1  -1  -4  863.49   26.42
  -1  -1  -4  878.65   26.75
   1   1   4  849.03   26.19
   1   1   4  863.89   26.60
   1   1   4  861.74   26.40
  -2  -1  -4  167.10    5.18
  -2  -1  -4  160.70    5.16
   2   1   4  171.39    5.17
   2   1   4  177.37    5.16
   2   1   4  156.25    5.18
  -3  -1  -4   41.76    1.44
  -3  -1  -4   40.55    1.36
   3   1   4   38.88    1.43
   3   1   4   46.62    1.43
  -4  -1  -4   12.86    0.50
  -4  -1  -4   12.48    0.56
   4   1   4   12.70    0.56
   4   1   4   12.96    0.50
  -5  -1  -4   18.26    0.76
   5   1   4   18.70    0.70
   5   1   4   18.44    0.77
  -6  -1  -4   27.46    1.10
  -6  -1  -4   28.69    0.95
  -6  -1  -4   30.41    0.99
  -6  -1  -4   29.28    1.04
   6   1   4   29.07    1.14
   6   1   4   28.39    1.04
  -7  -1  -4   24.03    1.00
  -7  -1  -4   25.76    0.85
  -7  -1  -4   24.54    0.94
   7   1   4   24.06    0.93
   7   1   4   25.72    1.03
  -8  -1  -4    1.40    0.25
  -8  -1  -4    1.51    0.13
  -8  -1  -4    1.35    0.18
  -8  -1  -4    1.57    0.21
   8   1   4    1.53    0.26
   8   1   4    1.43    0.20
  -9  -1  -4    1.04    0.19
  -9  -1  -4    1.04    0.23
  -9  -1  -4    1.03    0.18
  -9  -1  -4    0.64    0.16
   9   1   4    0.67    0.17
   9   1   4    1.14    0.29
 -10  -1  -4    5.26    0.43
 -10  -1  -4    4.75    0.37
 -10  -1  -4    4.90    0.45
 -10  -1  -4    5.20    0.36
  10   1   4    5.22    0.53
  10   1   4    5.07    0.41
 -11  -1  -4    0.38    0.19
 -11  -1  -4    0.35    0.22
 -11  -1  -4   -0.06    0.24
 -11  -1  -4    0.36    0.20
  11   1   4    0.19    0.29
  11   1   4    0.33    0.17
 -12  -1  -4   -0.05    0.29
 -12  -1  -4    0.12    0.25
 -12  -1  -4   -0.29    0.23
  12   1   4    0.13    0.23
  12   1   4    0.50    0.40
 -13  -1  -4    0.02    0.30
  13   1   4    0.48    0.30
  13   1   4   -0.05    0.47
 -14  -1  -4    1.01    0.41
  11  -2  -4    0.09    0.33
 -11   2   4    0.38    0.36
  10  -2  -4    0.82    0.29
 -10   2   4    1.54    0.31
   9  -2  -4    0.77    0.24
  -9   2   4   -0.75    0.29
  -9   2   4    0.08    0.25
  -9   2   4    0.23    0.22
   8  -2  -4    7.01    0.47
  -8   2   4    7.42    0.56
  -8   2   4    6.88    0.47
  -8   2   4    6.49    0.55
   7  -2  -4    4.75    0.38
  -7   2   4    4.43    0.43
  -7   2   4    5.14    0.39
  -7   2   4    5.34    0.44
  -7   2   4    4.66    0.35
   6  -2  -4    7.38    0.41
   6  -2  -4    7.89    0.35
   6  -2  -4    6.07    0.32
  -6   2   4    7.96    0.46
  -6   2   4    7.79    0.49
  -6   2   4    7.41    0.44
  -6   2   4    7.48    0.38
   5  -2  -4    8.82    0.41
   5  -2  -4   10.56    0.43
   5  -2  -4   10.29    0.48
  -5   2   4   10.74    0.52
  -5   2   4   10.22    0.45
  -5   2   4   10.27    0.54
  -5   2   4   10.71    0.52
   4  -2  -4   24.97    0.93
   4  -2  -4   25.54    0.89
  -4   2   4   26.01    0.98
  -4   2   4   26.11    0.95
  -4   2   4   24.84    0.99
  -4   2   4   26.79    0.91
   3  -2  -4    5.46    0.29
   3  -2  -4    5.45    0.27
   3  -2  -4    5.53    0.29
  -3   2   4    5.56    0.33
  -3   2   4    5.41    0.30
  -3   2   4    5.59    0.34
   2  -2  -4   12.95    0.49
   2  -2  -4   12.05    0.49
   2  -2  -4   12.79    0.51
  -2   2   4   11.49    0.49
  -2   2   4   12.71    0.55
  -2   2   4   12.63    0.54
  -2   2   4   13.48    0.51
   1  -2  -4   63.00    2.07
   1  -2  -4   58.74    2.11
   1  -2  -4   70.71    2.18
   1  -2  -4   65.92    2.08
   1  -2  -4   67.11    2.10
  -1   2   4   65.02    2.13
  -1   2   4   68.46    2.15
   0  -2  -4   59.47    1.95
   0  -2  -4   56.60    1.92
   0  -2  -4   59.56    1.90
   0  -2  -4   59.08    1.90
   0   2   4   60.46    1.95
   0   2   4   58.64    1.91
  -1  -2  -4    8.87    0.37
  -1  -2  -4    7.77    0.37
  -1  -2  -4    7.37    0.36
   1   2   4    8.66    0.35
   1   2   4    8.01    0.36
   1   2   4    8.57    0.37
   1   2   4    8.56    0.38
  -2  -2  -4   59.76    1.94
  -2  -2  -4   56.32    1.92
  -2  -2  -4   59.78    1.91
  -2  -2  -4   58.75    1.94
   2   2   4   56.93    1.93
   2   2   4   60.73    1.94
   2   2   4   60.49    1.87
   2   2   4   61.07    1.90
  -3  -2  -4  128.74    3.91
  -3  -2  -4  122.09    3.95
  -3  -2  -4  124.30    3.88
  -3  -2  -4  126.27    3.86
   3   2   4  127.16    3.86
   3   2   4  117.90    3.93
   3   2   4  126.69    3.94
  -4  -2  -4   34.51    1.26
  -4  -2  -4   35.62    1.18
  -4  -2  -4   35.09    1.19
   4   2   4   34.88    1.25
   4   2   4   36.09    1.18
  -5  -2  -4    0.73    0.15
  -5  -2  -4    0.63    0.11
   5   2   4    0.62    0.11
   5   2   4    0.65    0.14
  -6  -2  -4    0.28    0.10
  -6  -2  -4    0.05    0.12
  -6  -2  -4    0.06    0.07
   6   2   4    0.16    0.08
  -7  -2  -4   22.22    0.76
  -7  -2  -4   21.14    0.90
   7   2   4   22.08    0.92
   7   2   4   21.05    0.83
  -8  -2  -4   28.94    1.08
  -8  -2  -4   28.11    1.14
  -8  -2  -4   28.90    0.95
   8   2   4   28.90    1.08
   8   2   4   28.03    1.15
  -9  -2  -4   -0.16    0.12
  -9  -2  -4    0.09    0.15
  -9  -2  -4    0.09    0.16
  -9  -2  -4    0.03    0.12
   9   2   4   -0.03    0.11
 -10  -2  -4    2.11    0.26
 -10  -2  -4    1.72    0.26
 -10  -2  -4    2.22    0.26
 -10  -2  -4    2.78    0.38
  10   2   4    2.10    0.33
  10   2   4    2.41    0.31
 -11  -2  -4    2.10    0.27
 -11  -2  -4    1.31    0.27
 -11  -2  -4    1.13    0.27
 -11  -2  -4    1.24    0.28
  11   2   4    1.43    0.23
  11   2   4    1.37    0.33
 -12  -2  -4    5.08    0.54
 -12  -2  -4    5.60    0.50
 -12  -2  -4    4.95    0.44
  12   2   4    5.01    0.49
  12   2   4    4.74    0.63
 -13  -2  -4    4.14    0.49
 -13  -2  -4    3.68    0.43
 -13  -2  -4    4.43    0.61
  13   2   4    3.54    0.53
  13   2   4    4.07    0.54
  11  -3  -4    1.81    0.39
 -11   3   4    2.88    0.47
 -10   3   4    2.07    0.37
 -10   3   4    1.92    0.46
   9  -3  -4   -0.34    0.22
  -9   3   4    0.04    0.23
  -9   3   4    0.05    0.28
  -9   3   4    1.15    0.35
   8  -3  -4    1.80    0.27
  -8   3   4    2.40    0.37
  -8   3   4    1.38    0.29
  -8   3   4    1.16    0.31
   7  -3  -4   19.65    0.86
  -7   3   4   21.18    0.87
  -7   3   4   19.99    0.91
  -7   3   4   20.80    0.96
   6  -3  -4    8.38    0.47
   6  -3  -4    6.90    0.38
  -6   3   4    8.66    0.53
  -6   3   4    8.72    0.50
  -6   3   4    8.18    0.49
   5  -3  -4    4.74    0.24
   5  -3  -4    3.92    0.26
   5  -3  -4    4.21    0.29
   5  -3  -4    4.49    0.30
  -5   3   4    4.92    0.35
  -5   3   4    4.79    0.37
  -5   3   4    4.54    0.34
   4  -3  -4    5.34    0.30
   4  -3  -4    6.35    0.29
   4  -3  -4    6.07    0.34
  -4   3   4    6.34    0.39
  -4   3   4    6.72    0.37
  -4   3   4    6.72    0.39
   3  -3  -4    1.16    0.14
   3  -3  -4    0.91    0.13
   3  -3  -4    0.77    0.12
  -3   3   4    0.97    0.19
  -3   3   4    0.88    0.16
   2  -3  -4    2.61    0.18
   2  -3  -4    1.95    0.20
   2  -3  -4    2.09    0.23
   2  -3  -4    2.22    0.18
  -2   3   4    1.88    0.17
  -2   3   4    2.09    0.21
  -2   3   4    2.34    0.21
   1  -3  -4   98.39    3.16
   1  -3  -4  101.00    3.18
   1  -3  -4  106.92    3.27
   1  -3  -4  103.63    3.21
  -1   3   4  100.67    3.23
  -1   3   4   99.72    3.23
  -1   3   4   98.43    3.22
   0  -3  -4    4.69    0.26
   0  -3  -4    4.46    0.24
   0  -3  -4    4.76    0.28
   0  -3  -4    4.46    0.21
   0   3   4    4.62    0.29
   0   3   4    4.63    0.25
   0   3   4    4.50    0.27
   0   3   4    4.83    0.28
  -1  -3  -4    0.66    0.12
  -1  -3  -4    0.57    0.11
  -1  -3  -4    0.97    0.13
   1   3   4    0.72    0.12
   1   3   4    0.88    0.11
   1   3   4    0.71    0.13
   1   3   4    0.68    0.12
  -2  -3  -4   11.00    0.47
  -2  -3  -4   10.02    0.45
  -2  -3  -4   10.84    0.47
   2   3   4   10.84    0.47
   2   3   4   11.52    0.41
   2   3   4    9.43    0.45
   2   3   4   10.73    0.44
   2   3   4   11.48    0.48
  -3  -3  -4    3.16    0.22
  -3  -3  -4    3.33    0.17
  -3  -3  -4    3.15    0.24
  -3  -3  -4    2.91    0.21
   3   3   4    3.31    0.24
   3   3   4    3.23    0.23
   3   3   4    3.50    0.19
   3   3   4    3.29    0.24
  -4  -3  -4   17.86    0.62
  -4  -3  -4   16.23    0.70
  -4  -3  -4   17.16    0.62
  -4  -3  -4   16.32    0.65
   4   3   4   16.91    0.70
   4   3   4   17.84    0.63
   4   3   4   17.66    0.59
  -5  -3  -4   22.67    0.81
  -5  -3  -4   22.21    0.89
  -5  -3  -4   23.11    0.81
   5   3   4   21.11    0.89
   5   3   4   22.15    0.80
  -6  -3  -4    8.98    0.40
  -6  -3  -4    8.25    0.38
  -6  -3  -4    8.72    0.48
   6   3   4    8.63    0.49
   6   3   4    8.60    0.40
  -7  -3  -4    2.09    0.28
  -7  -3  -4    1.70    0.19
  -7  -3  -4    1.52    0.16
   7   3   4    1.37    0.22
   7   3   4    1.52    0.18
  -8  -3  -4   60.74    2.14
  -8  -3  -4   61.16    1.94
  -8  -3  -4   61.10    2.06
   8   3   4   60.28    2.12
   8   3   4   60.10    2.05
  -9  -3  -4    1.21    0.18
  -9  -3  -4    1.09    0.14
  -9  -3  -4    1.44    0.24
   9   3   4    0.88    0.17
 -10  -3  -4    2.57    0.39
 -10  -3  -4    2.67    0.33
 -10  -3  -4    2.02    0.27
  10   3   4    2.66    0.38
 -11  -3  -4    1.52    0.27
 -11  -3  -4    1.73    0.29
 -11  -3  -4    2.26    0.35
  11   3   4    2.18    0.37
  11   3   4    1.94    0.31
 -12  -3  -4    2.62    0.36
 -12  -3  -4    2.28    0.36
  12   3   4    2.19    0.30
  12   3   4    2.42    0.40
 -13  -3  -4    0.12    0.33
 -13  -3  -4   -0.14    0.28
  13   3   4   -0.06    0.25
  13   3   4    0.38    0.39
 -14  -3  -4    6.57    0.73
  14   3   4    6.48    0.69
  10  -4  -4    0.15    0.32
 -10   4   4    0.06    0.40
   9  -4  -4   -0.02    0.25
  -9   4   4   -0.06    0.35
   8  -4  -4   -0.31    0.18
  -8   4   4    0.79    0.29
  -8   4   4   -0.05    0.21
  -8   4   4   -0.01    0.27
   7  -4  -4    5.34    0.43
  -7   4   4    5.17    0.48
  -7   4   4    5.81    0.44
  -7   4   4    6.81    0.51
   6  -4  -4    4.42    0.36
  -6   4   4    5.00    0.40
  -6   4   4    4.32    0.42
  -6   4   4    6.09    0.43
   5  -4  -4    0.63    0.17
   5  -4  -4    0.64    0.15
   5  -4  -4    0.67    0.15
  -5   4   4    0.85    0.19
  -5   4   4    0.79    0.17
  -5   4   4    0.43    0.19
   4  -4  -4    3.14    0.24
   4  -4  -4    3.03    0.34
   4  -4  -4    3.23    0.24
  -4   4   4    3.28    0.28
  -4   4   4    3.52    0.31
  -4   4   4    3.18    0.31
   3  -4  -4    0.70    0.13
   3  -4  -4    0.57    0.11
   3  -4  -4    0.44    0.11
   3  -4  -4    0.50    0.16
  -3   4   4    0.74    0.16
  -3   4   4    0.36    0.10
  -3   4   4    0.64    0.15
  -3   4   4    0.69    0.18
   2  -4  -4    2.36    0.21
   2  -4  -4    2.41    0.17
   2  -4  -4    2.71    0.20
   2  -4  -4    2.56    0.27
  -2   4   4    2.21    0.22
  -2   4   4    2.56    0.24
  -2   4   4    2.16    0.24
  -2   4   4    2.24    0.18
   1  -4  -4    0.58    0.12
   1  -4  -4    0.54    0.14
   1  -4  -4    0.47    0.14
   1  -4  -4    0.59    0.10
  -1   4   4    0.32    0.13
  -1   4   4    0.58    0.12
  -1   4   4    0.50    0.11
   0  -4  -4   21.04    0.73
   0  -4  -4   22.71    0.84
   0  -4  -4   21.84    0.82
   0   4   4   21.20    0.79
   0   4   4   21.13    0.83
   0   4   4   22.61    0.84
  -1  -4  -4    0.16    0.08
  -1  -4  -4   -0.01    0.07
  -1  -4  -4    0.05    0.07
   1   4   4    0.19    0.09
   1   4   4    0.03    0.07
   1   4   4    0.08    0.09
  -2  -4  -4   19.66    0.76
  -2  -4  -4   18.51    0.75
  -2  -4  -4   19.89    0.75
   2   4   4   20.28    0.69
   2   4   4   19.13    0.71
   2   4   4   19.31    0.76
   2   4   4   19.93    0.76
  -3  -4  -4   -0.01    0.04
  -3  -4  -4   -0.01    0.08
  -3  -4  -4    0.07    0.07
   3   4   4    0.01    0.07
   3   4   4    0.00    0.08
   3   4   4    0.11    0.07
   3   4   4   -0.07    0.08
   3   4   4    0.07    0.06
  -4  -4  -4   12.35    0.47
  -4  -4  -4   11.76    0.51
  -4  -4  -4   10.44    0.48
  -4  -4  -4   12.46    0.57
   4   4   4   12.42    0.56
   4   4   4   13.03    0.57
   4   4   4   12.15    0.53
   4   4   4   12.69    0.46
   4   4   4   12.58    0.47
  -5  -4  -4   28.85    1.00
  -5  -4  -4   26.38    1.04
  -5  -4  -4   31.83    1.04
  -5  -4  -4   29.28    1.13
   5   4   4   31.25    1.09
   5   4   4   30.30    0.97
   5   4   4   29.79    1.03
  -6  -4  -4    1.72    0.17
  -6  -4  -4    1.72    0.25
  -6  -4  -4    2.16    0.19
   6   4   4    2.28    0.22
   6   4   4    1.73    0.24
   6   4   4    1.85    0.17
  -7  -4  -4   13.52    0.55
  -7  -4  -4   14.30    0.68
  -7  -4  -4   13.61    0.58
   7   4   4   13.48    0.66
   7   4   4   14.06    0.58
  -8  -4  -4   20.46    0.80
  -8  -4  -4   19.18    0.72
  -8  -4  -4   19.21    0.88
   8   4   4   19.06    0.86
   8   4   4   19.53    0.79
  -9  -4  -4   18.33    0.77
  -9  -4  -4   17.52    0.85
  -9  -4  -4   16.90    0.66
   9   4   4   18.89    0.77
   9   4   4   17.52    0.85
 -10  -4  -4   20.88    0.97
 -10  -4  -4   22.17    0.92
 -10  -4  -4   20.85    0.91
  10   4   4   21.26    0.91
  10   4   4   21.28    0.97
 -11  -4  -4    4.43    0.45
 -11  -4  -4    4.05    0.50
 -11  -4  -4    4.03    0.44
  11   4   4    4.13    0.49
  11   4   4    3.52    0.40
 -12  -4  -4    0.92    0.29
 -12  -4  -4    0.68    0.28
  12   4   4    0.79    0.23
  12   4   4    0.92    0.33
 -13  -4  -4    0.04    0.34
 -13  -4  -4   -0.22    0.30
  13   4   4   -0.18    0.37
  13   4   4    0.22    0.25
 -14  -4  -4    1.66    0.47
 -14  -4  -4    2.05    0.46
  14   4   4    2.03    0.38
  10  -5  -4   -0.47    0.36
   9  -5  -4    3.75    0.50
  -9   5   4    2.83    0.53
   8  -5  -4    0.24    0.43
   8  -5  -4    0.21    0.33
   8  -5  -4    0.29    0.23
  -8   5   4    0.49    0.23
  -8   5   4    0.10    0.34
   7  -5  -4    5.62    0.50
   7  -5  -4    3.97    0.62
  -7   5   4    5.72    0.51
  -7   5   4    5.49    0.45
  -7   5   4    6.06    0.55
   6  -5  -4   -0.38    0.25
   6  -5  -4   -0.13    0.14
   6  -5  -4   -0.03    0.20
  -6   5   4   -0.09    0.23
  -6   5   4    0.04    0.18
  -6   5   4    0.33    0.20
   5  -5  -4    0.38    0.18
   5  -5  -4    0.55    0.14
   5  -5  -4    0.22    0.23
  -5   5   4    0.23    0.17
  -5   5   4    0.45    0.17
  -5   5   4    0.54    0.20
   4  -5  -4   15.94    0.70
   4  -5  -4   18.21    0.70
   4  -5  -4   17.22    0.81
  -4   5   4   17.53    0.76
  -4   5   4   16.93    0.76
  -4   5   4   17.38    0.78
  -4   5   4   17.29    0.71
   3  -5  -4    9.28    0.51
   3  -5  -4    8.33    0.44
   3  -5  -4    8.67    0.40
   3  -5  -4    8.65    0.37
  -3   5   4    8.51    0.48
  -3   5   4    8.61    0.41
  -3   5   4    8.30    0.49
  -3   5   4    8.41    0.47
   2  -5  -4    2.15    0.28
   2  -5  -4    2.08    0.17
   2  -5  -4    2.19    0.22
   2  -5  -4    2.62    0.21
  -2   5   4    2.30    0.24
  -2   5   4    2.44    0.25
  -2   5   4    2.13    0.26
   1  -5  -4   36.99    1.35
   1  -5  -4   39.61    1.33
   1  -5  -4   37.91    1.24
  -1   5   4   38.32    1.36
  -1   5   4   37.02    1.32
  -1   5   4   36.25    1.33
   0  -5  -4   14.69    0.61
   0  -5  -4   13.73    0.50
   0  -5  -4   14.27    0.61
   0   5   4   14.03    0.62
   0   5   4   13.91    0.57
   0   5   4   14.86    0.62
   0   5   4   13.24    0.59
  -1  -5  -4    0.39    0.13
   1   5   4    0.50    0.17
   1   5   4    0.39    0.10
   1   5   4    0.47    0.13
   1   5   4    0.25    0.10
  -2  -5  -4   16.23    0.67
  -2  -5  -4   15.39    0.66
   2   5   4   16.24    0.68
   2   5   4   16.82    0.68
   2   5   4   15.98    0.63
  -3  -5  -4   41.27    1.30
  -3  -5  -4   38.67    1.43
  -3  -5  -4   40.89    1.42
   3   5   4   40.12    1.42
   3   5   4   40.87    1.44
   3   5   4   41.69    1.32
   3   5   4   39.82    1.36
  -4  -5  -4    7.56    0.45
  -4  -5  -4    8.42    0.37
   4   5   4    8.72    0.50
   4   5   4    7.79    0.43
   4   5   4    7.92    0.36
  -5  -5  -4    1.17    0.19
  -5  -5  -4    0.99    0.13
   5   5   4    0.95    0.16
   5   5   4    0.94    0.13
   5   5   4    1.22    0.13
   5   5   4    1.19    0.18
  -6  -5  -4    0.11    0.14
  -6  -5  -4    0.06    0.13
  -6  -5  -4    0.03    0.07
   6   5   4    0.01    0.06
   6   5   4   -0.12    0.11
   6   5   4   -0.01    0.11
  -7  -5  -4   27.02    0.98
  -7  -5  -4   25.79    0.98
  -7  -5  -4   26.13    1.09
   7   5   4   26.62    0.97
   7   5   4   26.33    1.06
   7   5   4   27.95    1.02
  -8  -5  -4    1.68    0.26
  -8  -5  -4    1.77    0.23
  -8  -5  -4    1.93    0.22
   8   5   4    2.04    0.23
  -9  -5  -4   44.80    1.71
  -9  -5  -4   45.20    1.53
  -9  -5  -4   45.47    1.61
   9   5   4   46.00    1.61
   9   5   4   45.27    1.67
 -10  -5  -4   -0.01    0.18
 -10  -5  -4   -0.16    0.13
 -10  -5  -4    0.11    0.22
  10   5   4    0.30    0.21
  10   5   4    0.07    0.14
 -11  -5  -4   19.74    0.98
 -11  -5  -4   20.24    0.94
 -11  -5  -4   19.75    0.92
  11   5   4   19.86    0.90
  11   5   4   20.24    0.96
 -12  -5  -4    0.63    0.30
 -12  -5  -4    0.44    0.28
 -12  -5  -4    0.59    0.28
  12   5   4    0.57    0.31
  12   5   4    0.55    0.21
 -13  -5  -4    0.63    0.35
 -13  -5  -4    0.69    0.34
  13   5   4    0.13    0.35
 -14  -5  -4    0.03    0.40
 -14  -5  -4   -0.12    0.40
  14   5   4   -0.09    0.44
  14   5   4    0.33    0.30
   9  -6  -4   -0.12    0.32
  -9   6   4   -0.01    0.38
   8  -6  -4    2.70    0.60
   8  -6  -4    1.07    0.41
   8  -6  -4    2.11    0.33
  -8   6   4    1.99    0.40
  -8   6   4    1.97    0.45
   7  -6  -4    4.84    0.44
   7  -6  -4    4.36    0.58
   7  -6  -4    6.28    0.75
  -7   6   4    5.58    0.57
  -7   6   4    5.64    0.44
   6  -6  -4    1.61    0.37
   6  -6  -4    1.00    0.22
   6  -6  -4    1.62    0.31
  -6   6   4    1.06    0.24
  -6   6   4    1.20    0.26
   5  -6  -4    5.65    0.52
   5  -6  -4    4.37    0.35
  -5   6   4    4.62    0.38
  -5   6   4    3.92    0.39
  -5   6   4    4.43    0.41
   4  -6  -4   36.61    1.40
   4  -6  -4   34.53    1.30
   4  -6  -4   36.18    1.25
  -4   6   4   34.94    1.34
  -4   6   4   34.32    1.27
  -4   6   4   35.96    1.36
  -4   6   4   34.97    1.38
   3  -6  -4    3.64    0.37
   3  -6  -4    3.65    0.25
   3  -6  -4    3.68    0.32
  -3   6   4    3.06    0.30
  -3   6   4    3.32    0.32
  -3   6   4    3.70    0.27
  -3   6   4    3.49    0.36
   2  -6  -4    0.55    0.10
   2  -6  -4    0.62    0.18
   2  -6  -4    0.56    0.15
   2  -6  -4    0.58    0.12
  -2   6   4    0.26    0.13
  -2   6   4    0.53    0.17
  -2   6   4    0.45    0.14
   1  -6  -4    0.41    0.14
   1  -6  -4    0.16    0.07
  -1   6   4    0.07    0.12
  -1   6   4    0.20    0.11
  -1   6   4    0.16    0.11
   0  -6  -4   14.70    0.53
   0  -6  -4   15.20    0.65
   0  -6  -4   15.41    0.66
   0   6   4   14.68    0.62
   0   6   4   15.57    0.65
   0   6   4   16.09    0.67
   0   6   4   14.87    0.67
  -1  -6  -4    0.21    0.11
  -1  -6  -4    0.31    0.06
  -1  -6  -4    0.16    0.11
   1   6   4    0.22    0.14
   1   6   4    0.33    0.10
   1   6   4    0.23    0.11
   1   6   4    0.32    0.13
  -2  -6  -4    7.11    0.39
  -2  -6  -4    6.46    0.38
  -2  -6  -4    6.64    0.26
  -2  -6  -4    7.18    0.40
   2   6   4    6.59    0.35
   2   6   4    7.15    0.39
   2   6   4    6.99    0.33
   2   6   4    7.01    0.41
  -3  -6  -4    2.09    0.23
  -3  -6  -4    2.04    0.13
  -3  -6  -4    2.15    0.23
   3   6   4    1.95    0.18
   3   6   4    1.93    0.22
   3   6   4    1.99    0.23
  -4  -6  -4    7.14    0.43
  -4  -6  -4    6.76    0.39
  -4  -6  -4    6.48    0.29
   4   6   4    7.26    0.42
   4   6   4    7.21    0.30
   4   6   4    7.23    0.34
   4   6   4    6.63    0.41
  -5  -6  -4  100.28    3.27
  -5  -6  -4  104.86    3.44
  -5  -6  -4  105.15    3.36
   5   6   4  106.57    3.27
   5   6   4  103.20    3.38
   5   6   4  106.80    3.45
  -6  -6  -4   19.54    0.84
  -6  -6  -4   18.89    0.76
   6   6   4   19.15    0.79
   6   6   4   18.19    0.70
  -7  -6  -4    1.19    0.21
  -7  -6  -4    1.27    0.18
  -7  -6  -4    1.34    0.19
  -7  -6  -4    1.01    0.21
   7   6   4    1.24    0.22
   7   6   4    1.60    0.19
  -8  -6  -4   11.55    0.52
  -8  -6  -4   11.13    0.64
  -8  -6  -4   10.98    0.52
   8   6   4   11.25    0.56
   8   6   4   10.21    0.59
   8   6   4   11.03    0.51
  -9  -6  -4   36.28    1.37
  -9  -6  -4   35.32    1.44
  -9  -6  -4   34.72    1.28
  -9  -6  -4   36.76    1.32
   9   6   4   36.07    1.32
   9   6   4   38.12    1.35
   9   6   4   35.39    1.39
 -10  -6  -4    0.78    0.29
 -10  -6  -4    0.55    0.21
 -10  -6  -4    0.50    0.18
  10   6   4    0.60    0.23
  10   6   4    0.08    0.14
 -11  -6  -4    0.89    0.23
 -11  -6  -4    0.53    0.28
 -11  -6  -4    0.62    0.24
  11   6   4    0.44    0.18
  11   6   4    0.60    0.26
 -12  -6  -4    0.32    0.24
 -12  -6  -4    0.13    0.27
 -12  -6  -4    0.11    0.29
  12   6   4   -0.05    0.19
  12   6   4   -0.26    0.29
 -13  -6  -4    0.56    0.34
 -13  -6  -4    0.61    0.36
  13   6   4    0.06    0.24
 -14  -6  -4    0.78    0.41
 -14  -6  -4   -0.37    0.44
  14   6   4   -0.46    0.29
   8  -7  -4    0.29    0.31
  -8   7   4   -0.59    0.46
  -8   7   4   -0.07    0.34
   7  -7  -4    7.65    0.56
   7  -7  -4    7.57    0.83
   7  -7  -4    6.16    0.73
  -7   7   4    7.42    0.66
  -7   7   4    5.82    0.68
   6  -7  -4   -0.15    0.32
   6  -7  -4   -0.02    0.18
   6  -7  -4    0.56    0.35
  -6   7   4   -0.24    0.27
   5  -7  -4    0.68    0.28
   5  -7  -4    0.53    0.18
   5  -7  -4    0.31    0.29
  -5   7   4    0.56    0.24
  -5   7   4    0.78    0.29
  -5   7   4    0.37    0.20
  -5   7   4    0.44    0.22
   4  -7  -4    1.76    0.21
   4  -7  -4    1.85    0.33
  -4   7   4    1.97    0.25
  -4   7   4    1.99    0.32
  -4   7   4    1.80    0.30
  -4   7   4    1.93    0.32
   3  -7  -4    1.27    0.25
   3  -7  -4    1.75    0.28
   3  -7  -4    1.50    0.19
  -3   7   4    1.25    0.24
  -3   7   4    1.73    0.28
  -3   7   4    1.35    0.27
   2  -7  -4    7.35    0.45
   2  -7  -4    7.11    0.47
   2  -7  -4    7.71    0.38
   2  -7  -4    7.80    0.35
  -2   7   4    6.61    0.48
  -2   7   4    7.40    0.45
  -2   7   4    7.61    0.45
   1  -7  -4    3.68    0.20
   1  -7  -4    3.37    0.31
  -1   7   4    3.64    0.31
  -1   7   4    3.61    0.29
  -1   7   4    3.63    0.36
   0  -7  -4   10.59    0.38
   0   7   4   10.03    0.49
   0   7   4   10.36    0.56
   0   7   4   10.21    0.53
   0   7   4   11.38    0.53
  -1  -7  -4    1.56    0.24
   1   7   4    1.84    0.20
   1   7   4    1.81    0.25
   1   7   4    1.33    0.20
   1   7   4    1.58    0.22
  -2  -7  -4   29.20    1.10
  -2  -7  -4   28.08    0.91
   2   7   4   27.87    1.06
   2   7   4   30.08    1.11
   2   7   4   28.63    1.11
   2   7   4   29.03    1.02
  -3  -7  -4    0.21    0.12
  -3  -7  -4    0.18    0.12
  -3  -7  -4    0.09    0.05
   3   7   4    0.10    0.09
   3   7   4    0.09    0.12
   3   7   4    0.04    0.09
   3   7   4    0.05    0.11
  -4  -7  -4   13.10    0.53
  -4  -7  -4   15.95    0.71
  -4  -7  -4   15.98    0.68
   4   7   4   16.46    0.71
   4   7   4   14.90    0.68
   4   7   4   15.86    0.62
  -5  -7  -4   68.99    2.24
  -5  -7  -4   61.83    2.10
  -5  -7  -4   66.96    2.30
   5   7   4   69.75    2.31
   5   7   4   64.22    2.25
  -6  -7  -4   17.94    0.76
  -6  -7  -4   18.40    0.84
   6   7   4   18.21    0.68
   6   7   4   18.01    0.78
  -7  -7  -4    0.06    0.12
  -7  -7  -4   -0.01    0.09
  -7  -7  -4    0.13    0.18
   7   7   4    0.00    0.13
   7   7   4   -0.07    0.08
  -8  -7  -4   10.75    0.52
  -8  -7  -4   10.67    0.55
  -8  -7  -4   11.78    0.66
   8   7   4   10.72    0.51
   8   7   4   11.61    0.59
  -9  -7  -4    1.61    0.29
  -9  -7  -4    1.75    0.30
  -9  -7  -4    1.90    0.26
   9   7   4    2.36    0.32
   9   7   4    1.95    0.28
 -10  -7  -4    6.69    0.51
 -10  -7  -4    7.55    0.49
 -10  -7  -4    6.67    0.56
  10   7   4    7.58    0.50
  10   7   4    6.76    0.45
 -11  -7  -4    0.29    0.27
 -11  -7  -4    0.54    0.31
 -11  -7  -4    0.27    0.21
  11   7   4    0.51    0.20
 -12  -7  -4    0.71    0.32
 -12  -7  -4   -0.20    0.26
 -12  -7  -4    0.20    0.28
  12   7   4    0.29    0.21
 -13  -7  -4   -0.07    0.37
 -13  -7  -4   -0.75    0.36
  13   7   4   -0.03    0.25
 -14  -7  -4    6.11    0.83
  14   7   4    4.72    0.65
   7  -8  -4    0.67    0.28
   7  -8  -4   -0.11    0.47
  -7   8   4   -0.32    0.39
  -7   8   4    0.09    0.32
   6  -8  -4    0.45    0.41
   6  -8  -4    1.01    0.24
   6  -8  -4    0.77    0.39
  -6   8   4    1.01    0.33
  -6   8   4    0.88    0.32
   5  -8  -4    0.49    0.31
   5  -8  -4    0.34    0.30
   5  -8  -4    0.33    0.19
  -5   8   4    0.39    0.34
  -5   8   4    0.36    0.23
   4  -8  -4    1.52    0.33
   4  -8  -4    1.83    0.24
  -4   8   4    1.38    0.31
  -4   8   4    1.65    0.27
  -4   8   4    2.17    0.34
   3  -8  -4    1.68    0.18
   3  -8  -4    2.02    0.30
  -3   8   4    1.52    0.26
  -3   8   4    1.65    0.31
   2  -8  -4   19.15    0.71
   2  -8  -4   19.73    0.75
   2  -8  -4   20.13    0.87
   2  -8  -4   20.04    0.70
   2  -8  -4   17.26    0.82
  -2   8   4   20.26    0.91
  -2   8   4   19.23    0.86
   1  -8  -4    0.78    0.21
   1  -8  -4    0.88    0.21
   1  -8  -4    0.68    0.10
  -1   8   4    0.72    0.19
  -1   8   4    0.69    0.23
  -1   8   4    0.93    0.22
   0  -8  -4    6.02    0.43
   0  -8  -4    5.55    0.45
   0  -8  -4    5.50    0.23
   0   8   4    5.74    0.44
   0   8   4    5.73    0.39
   0   8   4    5.36    0.37
  -1  -8  -4    5.00    0.38
  -1  -8  -4    5.13    0.39
   1   8   4    5.49    0.42
   1   8   4    5.53    0.34
   1   8   4    5.50    0.36
   1   8   4    5.11    0.36
  -2  -8  -4    0.30    0.16
   2   8   4    0.69    0.13
   2   8   4    0.87    0.18
   2   8   4    0.33    0.15
   2   8   4    0.48    0.15
  -3  -8  -4    1.44    0.23
  -3  -8  -4    0.91    0.20
   3   8   4    0.98    0.20
   3   8   4    1.20    0.20
   3   8   4    1.20    0.23
   3   8   4    1.39    0.19
  -4  -8  -4    5.11    0.23
  -4  -8  -4    4.98    0.38
  -4  -8  -4    5.56    0.41
   4   8   4    6.05    0.41
   4   8   4    5.35    0.29
   4   8   4    4.82    0.39
  -5  -8  -4    8.75    0.50
  -5  -8  -4    8.07    0.35
  -5  -8  -4    8.49    0.52
   5   8   4    8.65    0.50
   5   8   4    8.83    0.52
  -6  -8  -4    2.08    0.18
  -6  -8  -4    2.20    0.33
  -6  -8  -4    2.05    0.29
   6   8   4    2.39    0.19
   6   8   4    2.31    0.29
   6   8   4    1.93    0.30
  -7  -8  -4    0.51    0.12
  -7  -8  -4    0.21    0.17
  -7  -8  -4    0.27    0.15
   7   8   4    0.60    0.12
   7   8   4    0.50    0.19
  -8  -8  -4   16.87    0.77
  -8  -8  -4   17.14    0.80
  -8  -8  -4   16.74    0.86
   8   8   4   16.93    0.69
   8   8   4   16.90    0.78
  -9  -8  -4    0.75    0.24
  -9  -8  -4    0.49    0.16
  -9  -8  -4    0.48    0.22
   9   8   4    0.67    0.16
   9   8   4    0.42    0.22
 -10  -8  -4    0.00    0.18
 -10  -8  -4    0.22    0.21
 -10  -8  -4   -0.10    0.24
  10   8   4    0.19    0.22
  10   8   4    0.00    0.15
 -11  -8  -4    0.10    0.25
 -11  -8  -4   -0.33    0.20
 -11  -8  -4    0.27    0.27
  11   8   4   -0.02    0.18
  11   8   4    0.17    0.25
 -12  -8  -4    0.21    0.31
 -12  -8  -4   -0.07    0.28
  12   8   4    0.35    0.23
 -13  -8  -4    0.98    0.45
  13   8   4    0.29    0.27
 -14  -8  -4    2.68    0.54
  14   8   4    2.48    0.41
   7  -9  -4    0.28    0.32
  -7   9   4    0.05    0.38
   6  -9  -4   -0.27    0.50
   6  -9  -4    0.07    0.25
  -6   9   4   -0.21    0.30
   5  -9  -4    0.39    0.40
   5  -9  -4    0.26    0.19
   5  -9  -4    0.78    0.37
  -5   9   4    0.70    0.30
  -5   9   4    0.99    0.39
   4  -9  -4    0.50    0.17
  -4   9   4    0.34    0.33
   3  -9  -4    0.25    0.24
   3  -9  -4    0.10    0.12
  -3   9   4   -0.12    0.18
  -3   9   4    0.10    0.28
   2  -9  -4    1.10    0.19
   2  -9  -4    0.91    0.17
   2  -9  -4    1.02    0.25
   2  -9  -4    1.20    0.16
  -2   9   4    0.89    0.21
  -2   9   4    0.75    0.25
   1  -9  -4    0.06    0.07
   1  -9  -4    0.02    0.18
  -1   9   4   -0.11    0.20
  -1   9   4    0.05    0.15
   0  -9  -4    0.43    0.18
   0  -9  -4    0.74    0.23
   0   9   4    0.40    0.23
   0   9   4    0.45    0.17
  -1  -9  -4    2.83    0.37
   1   9   4    2.43    0.30
   1   9   4    3.16    0.38
   1   9   4    3.13    0.28
  -2  -9  -4   -0.21    0.18
   2   9   4    0.07    0.18
   2   9   4    0.04    0.13
   2   9   4    0.01    0.14
  -3  -9  -4    2.77    0.34
   3   9   4    3.11    0.36
   3   9   4    3.23    0.27
   3   9   4    3.24    0.32
  -4  -9  -4    8.97    0.54
  -4  -9  -4    9.54    0.57
   4   9   4    8.95    0.56
   4   9   4    9.87    0.55
   4   9   4    9.65    0.45
  -5  -9  -4    1.60    0.15
  -5  -9  -4    2.02    0.30
  -5  -9  -4    1.97    0.32
   5   9   4    2.47    0.30
   5   9   4    2.32    0.22
   5   9   4    1.68    0.26
  -6  -9  -4    8.27    0.38
  -6  -9  -4    8.97    0.58
  -6  -9  -4    9.17    0.53
   6   9   4    8.29    0.53
   6   9   4    8.60    0.56
  -7  -9  -4    7.24    0.55
  -7  -9  -4    6.86    0.48
  -7  -9  -4    6.74    0.36
  -7  -9  -4    7.00    0.49
   7   9   4    6.87    0.36
   7   9   4    7.29    0.51
  -8  -9  -4   10.62    0.68
  -8  -9  -4   10.04    0.63
  -8  -9  -4   10.29    0.49
   8   9   4   10.48    0.62
   8   9   4   10.41    0.49
  -9  -9  -4    0.53    0.24
  -9  -9  -4    0.77    0.27
  -9  -9  -4    1.09    0.19
   9   9   4    1.22    0.27
   9   9   4    1.05    0.19
 -10  -9  -4   16.98    0.79
 -10  -9  -4   16.84    0.96
 -10  -9  -4   17.44    0.92
  10   9   4   18.04    0.79
  10   9   4   18.33    0.87
 -11  -9  -4   -0.13    0.27
 -11  -9  -4    0.10    0.32
 -11  -9  -4    0.52    0.23
  11   9   4    0.55    0.29
  11   9   4    0.48    0.21
 -12  -9  -4    1.99    0.34
 -12  -9  -4    1.95    0.45
  12   9   4    2.18    0.33
 -13  -9  -4    0.89    0.47
  13   9   4    1.85    0.34
 -14  -9  -4    2.82    0.59
  14   9   4    3.22    0.43
  -6  10   4    0.33    0.37
   5 -10  -4    0.23    0.24
   5 -10  -4    0.02    0.49
  -5  10   4    0.79    0.49
  -5  10   4    0.31    0.35
   4 -10  -4    0.13    0.18
   4 -10  -4    0.00    0.33
  -4  10   4    0.10    0.27
  -4  10   4    0.31    0.41
   3 -10  -4    4.34    0.50
   3 -10  -4    4.22    0.31
  -3  10   4    5.11    0.62
   2 -10  -4    2.69    0.34
   2 -10  -4    2.71    0.35
   2 -10  -4    2.65    0.21
   2 -10  -4    2.76    0.29
  -2  10   4    3.01    0.44
  -2  10   4    2.77    0.37
   1 -10  -4    0.17    0.21
   1 -10  -4    0.06    0.17
  -1  10   4    0.03    0.19
   0 -10  -4    0.07    0.16
   0  10   4    0.13    0.23
   0  10   4    0.03    0.15
  -1 -10  -4    1.60    0.26
   1  10   4    1.96    0.32
   1  10   4    1.33    0.24
   1  10   4    1.71    0.25
  -2 -10  -4   27.66    1.07
  -2 -10  -4   27.12    1.16
   2  10   4   27.51    1.10
   2  10   4   26.30    1.17
   2  10   4   26.14    1.04
  -3 -10  -4   12.82    0.71
  -3 -10  -4   12.83    0.65
   3  10   4   12.00    0.57
   3  10   4   11.66    0.71
   3  10   4   12.56    0.66
  -4 -10  -4    0.59    0.22
  -4 -10  -4    0.50    0.17
  -4 -10  -4    0.56    0.20
   4  10   4    0.59    0.16
   4  10   4    0.31    0.22
   4  10   4    0.58    0.21
  -5 -10  -4   52.82    1.82
  -5 -10  -4   59.07    2.07
  -5 -10  -4   61.25    2.17
  -5 -10  -4   59.60    2.11
   5  10   4   57.60    2.12
   5  10   4   59.94    1.93
   5  10   4   58.38    2.11
  -6 -10  -4    6.22    0.55
  -6 -10  -4    7.89    0.55
  -6 -10  -4    8.95    0.56
  -6 -10  -4    7.65    0.34
   6  10   4    6.66    0.54
   6  10   4    7.76    0.39
   6  10   4    7.66    0.57
  -7 -10  -4    0.20    0.26
  -7 -10  -4    0.20    0.20
   7  10   4    0.24    0.22
  -8 -10  -4    2.62    0.38
  -8 -10  -4    3.46    0.46
  -8 -10  -4    3.27    0.29
   8  10   4    2.97    0.41
   8  10   4    3.52    0.29
  -9 -10  -4    1.40    0.30
  -9 -10  -4    2.27    0.30
   9  10   4    2.03    0.28
   9  10   4    1.90    0.33
 -10 -10  -4   -0.05    0.27
 -10 -10  -4    0.09    0.32
 -10 -10  -4    0.09    0.18
  10  10   4    0.17    0.17
  10  10   4    0.01    0.25
 -11 -10  -4    4.55    0.63
 -11 -10  -4    4.76    0.46
  11  10   4    4.35    0.56
 -12 -10  -4    0.35    0.29
 -12 -10  -4    0.48    0.40
  12  10   4    1.15    0.27
  12  10   4    1.06    0.37
 -13 -10  -4    0.99    0.48
  13  10   4    0.98    0.31
 -14 -10  -4    1.27    0.58
  14  10   4    1.94    0.43
  -5  11   4    0.11    0.34
  -5  11   4    0.98    0.59
  -4  11   4    0.34    0.48
  -4  11   4    0.48    0.33
   3 -11  -4    0.36    0.30
   3 -11  -4    0.41    0.15
  -3  11   4    0.45    0.28
  -3  11   4    0.45    0.42
  -2  11   4    1.24    0.31
  -2  11   4    1.55    0.41
   1 -11  -4    3.29    0.39
  -1  11   4    3.40    0.48
  -1  11   4    3.98    0.41
   0 -11  -4    0.41    0.22
   0  11   4    0.22    0.19
   0  11   4    0.72    0.33
  -1 -11  -4    0.29    0.21
   1  11   4    0.36    0.28
   1  11   4    0.15    0.18
   1  11   4    0.47    0.21
  -2 -11  -4   15.44    0.74
   2  11   4   13.09    0.70
   2  11   4   13.84    0.80
   2  11   4   14.58    0.69
  -3 -11  -4   19.03    0.85
   3  11   4   17.42    0.85
   3  11   4   17.85    0.93
   3  11   4   18.03    0.78
  -4 -11  -4   13.92    0.73
  -4 -11  -4   13.60    0.79
   4  11   4   12.50    0.61
   4  11   4   13.00    0.76
   4  11   4   13.68    0.73
  -5 -11  -4    0.25    0.24
  -5 -11  -4   -0.14    0.19
   5  11   4   -0.01    0.20
   5  11   4    0.02    0.21
   5  11   4    0.02    0.17
  -6 -11  -4    8.33    0.37
  -6 -11  -4    9.50    0.61
  -6 -11  -4    8.65    0.66
   6  11   4    9.64    0.46
   6  11   4    9.48    0.62
   6  11   4    8.12    0.61
  -7 -11  -4    2.38    0.24
  -7 -11  -4    2.48    0.42
  -7 -11  -4    2.26    0.36
   7  11   4    2.15    0.34
   7  11   4    3.07    0.42
  -8 -11  -4    0.02    0.25
  -8 -11  -4   -0.06    0.14
  -8 -11  -4    0.14    0.31
   8  11   4   -0.02    0.26
  -9 -11  -4    0.26    0.30
  -9 -11  -4   -0.36    0.24
  -9 -11  -4   -0.18    0.16
   9  11   4    0.09    0.15
   9  11   4   -0.16    0.25
 -10 -11  -4    0.90    0.34
 -10 -11  -4   -0.07    0.21
  10  11   4    0.62    0.31
  10  11   4    0.47    0.19
 -11 -11  -4    0.68    0.36
 -11 -11  -4    0.52    0.29
  11  11   4    1.11    0.38
 -12 -11  -4   -0.15    0.31
 -12 -11  -4    0.26    0.38
  12  11   4    0.07    0.25
  12  11   4    0.29    0.36
 -13 -11  -4    0.12    0.52
  13  11   4    0.65    0.30
 -14 -11  -4   -0.11    0.61
  14  11   4   -0.06    0.38
  -4  12   4    0.84    0.60
  -3  12   4    0.81    0.36
  -3  12   4    0.85    0.50
  -2  12   4    0.96    0.43
  -2  12   4    0.50    0.32
   1 -12  -4   -0.36    0.23
  -1  12   4    0.07    0.40
  -1  12   4    0.07    0.23
   0 -12  -4    0.67    0.27
   0  12   4    0.58    0.25
   0  12   4    0.39    0.37
  -1 -12  -4    0.39    0.27
   1  12   4    0.46    0.22
   1  12   4    0.91    0.34
  -2 -12  -4    1.23    0.29
   2  12   4    0.99    0.25
   2  12   4    0.58    0.31
   2  12   4    1.22    0.25
  -3 -12  -4    3.59    0.50
   3  12   4    3.73    0.52
   3  12   4    3.21    0.37
   3  12   4    3.73    0.44
  -4 -12  -4   -0.01    0.26
  -4 -12  -4   -0.16    0.24
   4  12   4   -0.03    0.19
   4  12   4   -0.26    0.22
  -5 -12  -4   16.42    0.91
  -5 -12  -4   19.75    0.99
   5  12   4   17.46    0.76
   5  12   4   17.07    0.94
   5  12   4   17.94    0.91
  -6 -12  -4    0.37    0.25
  -6 -12  -4   -0.47    0.24
   6  12   4   -0.03    0.25
   6  12   4   -0.15    0.26
   6  12   4    0.09    0.19
  -7 -12  -4   -0.14    0.25
  -7 -12  -4   -0.13    0.29
   7  12   4    0.50    0.20
   7  12   4    0.45    0.27
   7  12   4   -0.07    0.28
  -8 -12  -4    0.68    0.17
  -8 -12  -4    0.41    0.31
  -8 -12  -4    0.52    0.30
   8  12   4    0.77    0.31
   8  12   4    0.73    0.31
  -9 -12  -4    3.15    0.52
   9  12   4    2.86    0.44
   9  12   4    2.29    0.44
 -10 -12  -4    0.14    0.24
 -10 -12  -4    0.00    0.35
  10  12   4    0.68    0.37
  10  12   4    0.17    0.19
 -11 -12  -4    0.61    0.42
 -11 -12  -4    0.96    0.31
  11  12   4    0.94    0.26
  11  12   4    0.22    0.38
 -12 -12  -4    1.46    0.40
 -12 -12  -4    2.65    0.56
  12  12   4    1.67    0.47
  12  12   4    2.02    0.33
  13  12   4    1.98    0.38
  13  12   4    1.56    0.52
  -2  13   4    1.38    0.58
  -2  13   4    2.25    0.41
  -1  13   4    0.35    0.34
   0 -13  -4   -0.30    0.31
   0  13   4   -0.09    0.42
   0  13   4    0.56    0.29
  -1 -13  -4    0.23    0.32
   1  13   4    0.70    0.42
  -2 -13  -4    6.14    0.65
   2  13   4    7.46    0.54
   2  13   4    6.38    0.50
   2  13   4    6.64    0.73
  -3 -13  -4    1.88    0.40
   3  13   4    1.76    0.30
   3  13   4    1.63    0.35
   3  13   4    1.11    0.39
  -4 -13  -4    0.40    0.34
  -4 -13  -4   -0.20    0.29
   4  13   4   -0.24    0.20
   4  13   4   -0.56    0.29
   4  13   4    0.16    0.28
  -5 -13  -4    1.39    0.35
  -5 -13  -4    1.01    0.33
   5  13   4    0.86    0.24
   5  13   4    1.34    0.37
   5  13   4    0.62    0.36
  -6 -13  -4    7.07    0.73
  -6 -13  -4    7.48    0.70
   6  13   4    6.34    0.62
   6  13   4    7.42    0.49
   6  13   4    5.89    0.64
  -7 -13  -4    0.08    0.31
  -7 -13  -4    0.13    0.36
   7  13   4    0.32    0.34
   7  13   4    0.43    0.32
   7  13   4    0.32    0.24
  -8 -13  -4    0.05    0.17
  -8 -13  -4   -0.44    0.36
   8  13   4    0.74    0.37
   8  13   4    0.10    0.31
  -9 -13  -4    4.17    0.43
  -9 -13  -4    4.80    0.63
   9  13   4    4.27    0.58
   9  13   4    4.90    0.64
 -10 -13  -4    2.48    0.48
 -10 -13  -4    2.01    0.32
  10  13   4    2.07    0.48
  10  13   4    1.60    0.44
 -11 -13  -4   -0.07    0.32
  11  13   4    0.57    0.26
  11  13   4    0.26    0.44
  11  13   4    0.10    0.45
 -12 -13  -4    1.25    0.43
 -12 -13  -4    0.36    0.56
  12  13   4    1.80    0.36
  12  13   4    1.99    0.55
  -1  14   4    0.78    0.32
  -1  14   4    1.58    0.63
   0  14   4    0.26    0.32
   0  14   4    0.50    0.53
  -1 -14  -4    1.68    0.46
   1  14   4    3.45    0.46
   1  14   4    2.49    0.60
  -2 -14  -4    0.50    0.42
   2  14   4    0.68    0.31
   2  14   4    1.14    0.45
  -3 -14  -4    3.73    0.53
   3  14   4    2.64    0.40
   3  14   4    3.29    0.55
   3  14   4    3.55    0.44
  -4 -14  -4    0.19    0.39
   4  14   4    0.25    0.34
   4  14   4    0.34    0.26
   4  14   4    0.43    0.44
  -5 -14  -4    0.52    0.40
   5  14   4    0.20    0.25
   5  14   4    0.34    0.33
   6  14   4    0.02    0.25
   7  14   4    0.62    0.36
   7  14   4    1.24    0.28
  -8 -14  -4    0.12    0.47
   8  14   4    0.56    0.29
   8  14   4   -0.07    0.36
  -9 -14  -4    0.27    0.44
   9  14   4    0.01    0.40
 -10 -14  -4    0.22    0.48
 -11 -14  -4    0.97    0.54
  11  14   4    0.20    0.54
  11  14   4   -0.37    0.47
 -12 -14  -4    2.05    0.67
  12  14   4    3.55    0.69
  12  14   4    0.69    0.58
   1  15   4   -0.11    0.63
   1  15   4   -0.27    0.36
   2  15   4    1.15    0.60
   2  15   4    1.80    0.38
  -3 -15  -4   -0.32    0.49
  -3 -15  -4    0.22    0.53
   3  15   4   -0.35    0.51
   3  15   4    0.90    0.34
  -4 -15  -4    1.43    0.58
   4  15   4    0.10    0.47
   4  15   4   -0.59    0.38
  -5 -15  -4    1.46    0.53
   5  15   4    0.06    0.40
   5  15   4    0.86    0.31
   5  15   4    1.73    0.48
  -6 -15  -4    0.48    0.50
   6  15   4   -0.79    0.41
   6  15   4    0.11    0.30
   6  15   4    0.36    0.47
  -7 -15  -4   -0.29    0.48
   7  15   4    0.72    0.48
   7  15   4    1.26    0.47
   7  15   4    0.58    0.32
  -8 -15  -4    0.59    0.56
   8  15   4    0.29    0.34
   8  15   4    0.43    0.46
   8  15   4    0.13    0.51
  -9 -15  -4    1.14    0.62
   9  15   4    0.02    0.55
   9  15   4    0.89    0.50
 -10 -15  -4    2.10    0.62
  10  15   4    1.92    0.60
  10  15   4    1.73    0.62
   5  16   4    0.85    0.38
   6  16   4    1.05    0.38
   6  16   4    2.28    0.54
   7  16   4    0.10    0.51
   7  16   4    1.02    0.39
   8  16   4    0.95    0.54
   6  15  -5    0.26    0.59
   9  14  -5    6.43    0.92
   8  14  -5   -0.42    0.51
   7  14  -5    5.68    0.73
   6  14  -5    7.50    0.87
   5  14  -5   -0.13    0.46
   4  14  -5    1.30    0.30
   4  14  -5    1.16    0.50
   3  14  -5    2.97    0.55
   2  14  -5    0.81    0.49
  -2 -14   5    0.83    0.52
   1  14  -5    0.99    0.49
  -1 -14   5    0.95    0.52
   0  14  -5    0.30    0.47
  -1  14  -5    1.37    0.60
  10  13  -5   -0.07    0.50
  10  13  -5    0.08    0.31
 -10 -13   5   -0.12    0.50
   9  13  -5    0.10    0.27
  -9 -13   5    0.10    0.48
   8  13  -5    0.23    0.23
   7  13  -5    0.13    0.20
   6  13  -5    0.46    0.41
   6  13  -5    0.41    0.19
   5  13  -5    1.12    0.43
   5  13  -5    0.61    0.17
   4  13  -5    1.80    0.47
   4  13  -5    1.16    0.16
  -4 -13   5    1.36    0.46
   3  13  -5    1.43    0.24
  -3 -13   5    2.01    0.48
  -2 -13   5    3.16    0.52
  -1 -13   5    0.08    0.40
   0  13  -5    1.00    0.43
   0 -13   5    1.16    0.40
  -1  13  -5    1.17    0.46
   1 -13   5    1.62    0.45
  -2  13  -5    0.10    0.44
  -3  13  -5    0.65    0.30
  -3  13  -5    0.57    0.50
  11  12  -5   -0.24    0.47
 -11 -12   5    0.75    0.58
  10  12  -5    0.35    0.40
  10  12  -5    0.39    0.29
 -10 -12   5    0.42    0.46
   9  12  -5    0.00    0.26
   9  12  -5    0.06    0.41
  -9 -12   5    0.09    0.38
   8  12  -5    0.31    0.37
   8  12  -5    0.39    0.24
  -8 -12   5   -0.02    0.34
   7  12  -5    0.48    0.36
   7  12  -5    0.19    0.19
   6  12  -5    0.04    0.18
   6  12  -5    0.12    0.34
   5  12  -5    1.11    0.37
   5  12  -5    1.26    0.18
  -5 -12   5    0.64    0.38
   4  12  -5   -0.17    0.31
   4  12  -5    0.47    0.14
  -4 -12   5    0.66    0.37
   3  12  -5    0.94    0.34
   3  12  -5    1.53    0.16
  -3 -12   5    1.67    0.42
   2  12  -5    7.63    0.39
   2  12  -5    8.32    0.70
   2  12  -5    7.76    0.34
  -2 -12   5    8.74    0.75
   1  12  -5    0.11    0.33
  -1 -12   5    0.91    0.36
   0  12  -5    0.48    0.36
   0 -12   5    0.55    0.33
  -1  12  -5    1.73    0.42
   1 -12   5    1.14    0.36
  -2  12  -5    1.98    0.46
   2 -12   5    1.22    0.38
  -3  12  -5   -0.45    0.41
  -4  12  -5    0.93    0.27
  11  11  -5    1.88    0.47
 -11 -11   5    2.17    0.51
  10  11  -5    1.43    0.42
  10  11  -5    0.90    0.30
 -10 -11   5    1.31    0.42
   9  11  -5   -0.08    0.36
   9  11  -5    0.27    0.25
   8  11  -5    0.65    0.24
   8  11  -5    1.00    0.36
  -8 -11   5    0.87    0.34
   7  11  -5    0.16    0.18
   7  11  -5   -0.62    0.27
   6  11  -5    0.98    0.19
   6  11  -5    1.49    0.35
  -6 -11   5    0.73    0.35
   5  11  -5    0.70    0.28
   5  11  -5    0.94    0.18
  -5 -11   5    0.95    0.31
   4  11  -5    0.15    0.13
   4  11  -5    0.40    0.31
  -4 -11   5    0.01    0.25
   3  11  -5    7.32    0.64
   3  11  -5    6.64    0.35
  -3 -11   5    7.36    0.66
   2  11  -5    3.08    0.46
   2  11  -5    2.68    0.23
  -2 -11   5    3.32    0.44
   1  11  -5    1.85    0.20
   1  11  -5    2.01    0.36
   1  11  -5    2.28    0.21
  -1 -11   5    2.72    0.40
   0  11  -5    0.40    0.11
   0  11  -5    0.04    0.27
   0  11  -5    0.61    0.13
   0 -11   5    0.84    0.29
  -1  11  -5    2.64    0.22
  -1  11  -5    2.76    0.44
   1 -11   5    1.90    0.42
   1 -11   5    2.92    0.38
  -2  11  -5    0.03    0.13
  -2  11  -5    0.64    0.37
   2 -11   5   -0.29    0.28
  -3  11  -5    0.08    0.16
  -3  11  -5    0.52    0.35
   3 -11   5   -0.01    0.28
  -4  11  -5    4.75    0.46
  -4  11  -5    4.82    0.43
  -4  11  -5    4.07    0.54
  -5  11  -5    0.45    0.42
  -5  11  -5    0.16    0.27
  -6  11  -5    0.84    0.30
  -6  11  -5   -0.25    0.46
  12  10  -5    0.63    0.35
 -12 -10   5    0.98    0.57
  11  10  -5    0.90    0.39
 -11 -10   5    1.10    0.39
  10  10  -5   -0.29    0.31
  10  10  -5    0.21    0.24
 -10 -10   5    0.04    0.34
   9  10  -5    0.96    0.34
   9  10  -5    0.90    0.26
  -9 -10   5    0.80    0.31
   8  10  -5    0.47    0.30
   8  10  -5    0.11    0.20
  -8 -10   5    0.44    0.27
  -8 -10   5   -0.10    0.36
   7  10  -5    1.16    0.32
   7  10  -5    1.07    0.21
  -7 -10   5    0.22    0.30
   6  10  -5    1.57    0.32
   6  10  -5    1.80    0.40
   6  10  -5    1.69    0.23
  -6 -10   5    1.93    0.38
   5  10  -5    1.73    0.22
   5  10  -5    1.52    0.31
  -5 -10   5    1.66    0.35
   4  10  -5    0.36    0.21
   4  10  -5    0.17    0.13
  -4 -10   5    0.57    0.25
   3  10  -5    2.41    0.24
   3  10  -5    2.54    0.34
  -3 -10   5    2.59    0.35
   2  10  -5   11.47    0.67
   2  10  -5   11.72    0.49
  -2 -10   5   12.94    0.72
   1  10  -5    5.76    0.47
   1  10  -5    4.91    0.29
   1  10  -5    5.02    0.29
   1  10  -5    5.02    0.26
  -1 -10   5    6.57    0.54
   0  10  -5   12.73    0.75
   0  10  -5   12.57    0.51
   0  10  -5   13.41    0.67
   0 -10   5   14.69    0.74
  -1  10  -5    1.22    0.30
  -1  10  -5    1.20    0.16
   1 -10   5    2.03    0.31
   1 -10   5    1.75    0.36
  -2  10  -5    0.78    0.31
   2 -10   5   -0.46    0.32
   2 -10   5    0.51    0.24
  -3  10  -5    1.30    0.34
  -3  10  -5    0.84    0.17
   3 -10   5    0.74    0.26
   3 -10   5    0.79    0.42
  -4  10  -5    0.04    0.17
  -4  10  -5    0.01    0.30
  -5  10  -5    0.26    0.23
  -5  10  -5    0.65    0.24
  -5  10  -5    0.22    0.35
  -6  10  -5    5.32    0.53
  -6  10  -5    6.71    0.74
  -7  10  -5    0.02    0.28
  -7  10  -5   -0.08    0.43
  12   9  -5   -0.30    0.32
 -12  -9   5   -0.47    0.48
  11   9  -5    0.47    0.33
 -11  -9   5    0.10    0.46
  10   9  -5    0.02    0.30
  10   9  -5    0.27    0.24
 -10  -9   5    0.20    0.29
   9   9  -5    1.11    0.26
   9   9  -5    1.94    0.36
  -9  -9   5    2.01    0.33
  -9  -9   5    1.86    0.46
   8   9  -5    0.00    0.24
   8   9  -5   -0.03    0.18
  -8  -9   5   -0.08    0.22
  -8  -9   5   -0.03    0.27
   7   9  -5    6.04    0.53
   7   9  -5    6.53    0.43
   7   9  -5    6.58    0.55
  -7  -9   5    5.61    0.59
   6   9  -5    0.83    0.24
   6   9  -5    0.90    0.18
  -6  -9   5    0.51    0.27
   5   9  -5   18.51    0.74
   5   9  -5   18.95    0.90
  -5  -9   5   17.22    0.90
   4   9  -5   12.99    0.76
   4   9  -5   13.46    0.57
  -4  -9   5   13.79    0.76
   3   9  -5    8.61    0.56
   3   9  -5    8.47    0.41
  -3  -9   5    8.63    0.58
   2   9  -5   12.66    0.65
   2   9  -5   12.19    0.50
  -2  -9   5   11.84    0.66
   1   9  -5    2.77    0.37
   1   9  -5    2.89    0.23
  -1  -9   5    2.88    0.40
   0   9  -5   24.00    0.98
   0   9  -5   22.49    0.82
   0  -9   5   23.22    0.98
  -1   9  -5    2.23    0.20
  -1   9  -5    2.56    0.34
   1  -9   5    3.36    0.37
   1  -9   5    2.23    0.36
  -2   9  -5   10.62    0.64
  -2   9  -5   10.98    0.54
   2  -9   5    9.23    0.72
   2  -9   5   11.27    0.59
  -3   9  -5   11.26    0.51
  -3   9  -5   12.89    0.73
   3  -9   5   10.58    0.60
   3  -9   5   11.57    0.82
  -4   9  -5    8.71    0.44
   4  -9   5    9.69    0.80
   4  -9   5    7.12    0.47
  -5   9  -5    2.38    0.43
  -5   9  -5    2.72    0.35
   5  -9   5    2.78    0.62
  -6   9  -5    0.26    0.31
  -6   9  -5    0.18    0.24
  -6   9  -5    0.66    0.23
  -7   9  -5    0.97    0.35
  -7   9  -5    0.79    0.30
  -7   9  -5    0.67    0.39
  -8   9  -5    0.21    0.42
  -8   9  -5    0.35    0.29
  12   8  -5    0.69    0.32
 -12  -8   5    1.82    0.47
  11   8  -5    1.96    0.34
 -11  -8   5    1.80    0.45
  10   8  -5    0.18    0.22
  10   8  -5    0.32    0.27
 -10  -8   5    0.19    0.34
   9   8  -5    1.28    0.29
   9   8  -5    1.12    0.23
  -9  -8   5    1.45    0.27
  -9  -8   5    1.30    0.30
  -9  -8   5    1.47    0.38
   8   8  -5    0.13    0.17
   8   8  -5   -0.15    0.22
   8   8  -5   -0.20    0.24
  -8  -8   5    0.04    0.25
  -8  -8   5   -0.07    0.18
   7   8  -5    4.08    0.45
   7   8  -5    4.54    0.37
  -7  -8   5    4.38    0.51
   6   8  -5    0.89    0.18
   6   8  -5    1.32    0.30
  -6  -8   5    1.28    0.29
   5   8  -5    6.73    0.49
   5   8  -5    6.78    0.38
  -5  -8   5    7.08    0.53
   4   8  -5    2.99    0.37
   4   8  -5    2.81    0.24
  -4  -8   5    3.69    0.39
   3   8  -5    7.28    0.36
   3   8  -5    6.99    0.47
  -3  -8   5    7.18    0.49
   2   8  -5    2.90    0.24
   2   8  -5    3.37    0.34
  -2  -8   5    3.93    0.36
   1   8  -5   28.72    1.11
  -1  -8   5   28.90    1.14
   0   8  -5    5.28    0.38
   0  -8   5    5.36    0.41
  -1   8  -5    2.79    0.30
  -1   8  -5    3.06    0.22
   1  -8   5    2.94    0.36
   1  -8   5    3.41    0.33
  -2   8  -5    6.20    0.41
   2  -8   5    5.17    0.53
   2  -8   5    4.96    0.39
  -3   8  -5    0.00    0.11
  -3   8  -5   -0.03    0.13
   3  -8   5   -0.45    0.22
  -4   8  -5    3.95    0.30
  -4   8  -5    4.31    0.45
   4  -8   5    3.23    0.34
   4  -8   5    3.56    0.47
  -5   8  -5    0.33    0.17
  -5   8  -5    0.44    0.26
   5  -8   5    0.47    0.40
  -6   8  -5    6.01    0.59
  -6   8  -5    6.45    0.45
  -6   8  -5    6.33    0.45
   6  -8   5    5.94    0.86
  -7   8  -5    0.17    0.29
  -7   8  -5   -0.19    0.25
  -7   8  -5   -0.12    0.19
  -8   8  -5    0.27    0.27
  -8   8  -5   -0.35    0.33
  -8   8  -5    0.51    0.35
  -9   8  -5    1.23    0.37
  12   7  -5   -0.55    0.29
 -12  -7   5    0.03    0.41
  11   7  -5    0.66    0.24
 -11  -7   5    0.66    0.38
  10   7  -5    0.68    0.22
  10   7  -5    0.59    0.25
 -10  -7   5    0.99    0.36
 -10  -7   5    0.62    0.34
 -10  -7   5    0.56    0.31
   9   7  -5    1.45    0.27
   9   7  -5    1.34    0.27
  -9  -7   5    1.29    0.34
  -9  -7   5    1.47    0.30
   8   7  -5    8.96    0.61
   8   7  -5    9.10    0.52
  -8  -7   5    9.52    0.66
  -8  -7   5    9.17    0.50
  -8  -7   5    9.12    0.58
   7   7  -5    8.76    0.59
   7   7  -5    9.18    0.50
  -7  -7   5    9.20    0.50
  -7  -7   5    8.77    0.62
   6   7  -5    5.02    0.43
   6   7  -5    4.89    0.34
  -6  -7   5    4.90    0.45
   5   7  -5    1.09    0.24
   5   7  -5    0.70    0.14
  -5  -7   5    0.76    0.20
   4   7  -5    4.32    0.28
   4   7  -5    4.14    0.37
  -4  -7   5    4.06    0.38
   3   7  -5   26.13    0.94
   3   7  -5   26.64    1.06
  -3  -7   5   26.27    1.07
   2   7  -5   20.08    0.74
   2   7  -5   20.15    0.85
  -2  -7   5   20.08    0.88
   1   7  -5    3.78    0.32
  -1  -7   5    3.55    0.34
   0   7  -5    1.20    0.13
   0   7  -5    1.37    0.21
   0  -7   5    1.20    0.19
  -1   7  -5    3.90    0.24
  -1   7  -5    4.18    0.32
   1  -7   5    4.51    0.33
   1  -7   5    3.73    0.39
  -2   7  -5    3.20    0.29
   2  -7   5    3.31    0.40
  -3   7  -5    0.00    0.13
  -3   7  -5    0.08    0.10
   3  -7   5   -0.42    0.21
   3  -7   5   -0.25    0.15
  -4   7  -5    2.82    0.25
  -4   7  -5    2.83    0.26
   4  -7   5    2.54    0.41
   4  -7   5    2.23    0.28
  -5   7  -5    0.87    0.18
  -5   7  -5    1.06    0.24
   5  -7   5    1.48    0.39
  -6   7  -5    1.84    0.24
  -6   7  -5    2.19    0.34
   6  -7   5    1.31    0.47
  -7   7  -5    2.58    0.32
  -7   7  -5    2.83    0.38
  -7   7  -5    2.85    0.33
   7  -7   5    1.95    0.46
  -8   7  -5    0.56    0.24
  -8   7  -5    0.54    0.29
  -8   7  -5    0.89    0.31
  -9   7  -5    2.28    0.37
  -9   7  -5    1.85    0.36
  -9   7  -5    1.72    0.42
  12   6  -5    2.97    0.41
  11   6  -5    1.85    0.24
 -11  -6   5    2.98    0.51
  10   6  -5    2.45    0.35
  10   6  -5    3.77    0.45
 -10  -6   5    3.81    0.53
 -10  -6   5    3.41    0.46
   9   6  -5    8.45    0.51
   9   6  -5    9.18    0.56
  -9  -6   5    9.24    0.64
  -9  -6   5    7.65    0.59
  -9  -6   5    8.68    0.68
   8   6  -5   13.67    0.73
   8   6  -5   13.47    0.66
  -8  -6   5   12.14    0.70
  -8  -6   5   13.66    0.76
   7   6  -5    9.94    0.62
   7   6  -5   10.27    0.54
  -7  -6   5   11.27    0.66
  -7  -6   5    9.93    0.49
  -7  -6   5   10.44    0.57
   6   6  -5   25.52    0.98
   6   6  -5   24.77    1.05
  -6  -6   5   25.87    1.08
   5   6  -5   16.52    0.68
   5   6  -5   16.66    0.77
  -5  -6   5   16.30    0.77
   4   6  -5   23.97    0.88
   4   6  -5   22.31    0.95
  -4  -6   5   23.88    0.97
   3   6  -5   27.20    1.06
   3   6  -5   27.44    0.97
   2   6  -5   23.06    0.93
   2   6  -5   23.95    0.85
  -2  -6   5   23.56    0.95
   1   6  -5   64.06    2.15
  -1  -6   5   64.27    2.17
   0   6  -5    6.08    0.36
   0   6  -5    5.26    0.27
   0  -6   5    5.77    0.37
  -1   6  -5    2.58    0.24
   1  -6   5    2.87    0.33
  -2   6  -5    1.45    0.19
  -2   6  -5    1.59    0.21
   2  -6   5    1.53    0.25
   2  -6   5    1.29    0.20
  -3   6  -5   -0.02    0.09
  -3   6  -5    0.37    0.12
   3  -6   5    0.12    0.13
   3  -6   5    0.16    0.17
  -4   6  -5    6.67    0.34
  -4   6  -5    6.89    0.37
   4  -6   5    5.70    0.37
   4  -6   5    7.60    0.55
  -5   6  -5    4.70    0.34
   5  -6   5    6.06    0.57
  -6   6  -5    3.11    0.36
  -6   6  -5    3.04    0.31
   6  -6   5    3.86    0.55
  -7   6  -5   -0.02    0.14
  -7   6  -5   -0.10    0.18
  -7   6  -5    0.42    0.22
   7  -6   5    0.05    0.12
   7  -6   5   -0.38    0.30
  -8   6  -5    3.17    0.38
  -8   6  -5    2.69    0.35
  -8   6  -5    2.89    0.34
   8  -6   5    2.63    0.28
   8  -6   5    3.19    0.64
  -9   6  -5    0.50    0.25
  -9   6  -5    0.09    0.25
  -9   6  -5    0.12    0.31
   9  -6   5   -0.22    0.47
   9  -6   5    0.58    0.22
 -10   6  -5    2.38    0.40
  12   5  -5    1.04    0.31
 -12  -5   5    1.13    0.53
 -11  -5   5    0.80    0.34
 -11  -5   5    0.44    0.40
  10   5  -5    2.08    0.23
  10   5  -5    1.66    0.28
 -10  -5   5    1.93    0.31
 -10  -5   5    3.17    0.43
   9   5  -5    1.64    0.28
   9   5  -5    1.16    0.22
  -9  -5   5    1.57    0.34
  -9  -5   5    1.07    0.30
  -9  -5   5    0.91    0.25
   8   5  -5   25.19    1.05
   8   5  -5   24.58    1.00
  -8  -5   5   23.68    1.01
  -8  -5   5   23.37    1.07
  -8  -5   5   24.44    1.05
   7   5  -5    2.27    0.28
   7   5  -5    2.52    0.34
  -7  -5   5    2.09    0.28
  -7  -5   5    1.83    0.27
   6   5  -5   16.61    0.71
   6   5  -5   17.00    0.78
  -6  -5   5   17.11    0.65
  -6  -5   5   16.17    0.73
  -6  -5   5   17.11    0.79
   5   5  -5   12.07    0.53
   5   5  -5   10.85    0.58
  -5  -5   5   11.96    0.61
   4   5  -5   46.73    1.56
   4   5  -5   45.15    1.63
   3   5  -5    2.18    0.19
  -3  -5   5    2.12    0.25
   2   5  -5   14.90    0.57
   2   5  -5   14.39    0.63
  -2  -5   5   14.38    0.65
   1   5  -5   30.35    1.10
  -1  -5   5   29.57    1.11
   0   5  -5   11.25    0.51
   0   5  -5   11.70    0.46
   0  -5   5   11.72    0.56
  -1   5  -5    0.61    0.09
  -1   5  -5    0.73    0.13
   1  -5   5    0.54    0.15
   1  -5   5    0.63    0.14
  -2   5  -5    5.86    0.32
  -2   5  -5    6.17    0.29
   2  -5   5    6.06    0.35
   2  -5   5    5.96    0.41
  -3   5  -5   12.57    0.50
   3  -5   5   10.52    0.51
   3  -5   5   13.12    0.65
  -4   5  -5    0.32    0.10
  -4   5  -5    0.35    0.11
   4  -5   5    0.63    0.13
   4  -5   5    0.11    0.16
  -5   5  -5    3.46    0.22
   5  -5   5    2.58    0.19
   5  -5   5    3.79    0.45
  -6   5  -5    8.78    0.47
   6  -5   5    8.50    0.39
   6  -5   5    9.52    0.66
  -7   5  -5    0.84    0.21
  -7   5  -5    0.74    0.16
  -7   5  -5    0.57    0.18
   7  -5   5    0.60    0.16
   7  -5   5    0.72    0.30
  -8   5  -5    0.64    0.21
  -8   5  -5    0.72    0.21
  -8   5  -5    0.64    0.19
   8  -5   5    0.25    0.40
   8  -5   5    0.21    0.18
  -9   5  -5    1.16    0.26
  -9   5  -5    0.51    0.27
  -9   5  -5    0.50    0.22
   9  -5   5    1.25    0.28
   9  -5   5    0.63    0.23
   9  -5   5    0.53    0.41
 -10   5  -5    1.66    0.27
  10  -5   5    1.17    0.58
  10  -5   5    2.24    0.39
  10  -5   5    1.22    0.30
 -11   5  -5    0.65    0.32
  11  -5   5    0.70    0.41
  12   4  -5    0.31    0.29
 -12  -4   5    1.29    0.48
 -11  -4   5   -0.23    0.37
 -11  -4   5   -0.28    0.29
  10   4  -5    1.95    0.30
  10   4  -5    1.90    0.21
 -10  -4   5    2.79    0.39
 -10  -4   5    2.11    0.41
   9   4  -5    9.39    0.57
   9   4  -5    9.00    0.45
  -9  -4   5    9.34    0.62
  -9  -4   5   10.32    0.68
  -9  -4   5    9.78    0.61
   8   4  -5   18.67    0.86
   8   4  -5   18.40    0.89
  -8  -4   5   19.12    0.86
  -8  -4   5   18.97    0.87
  -8  -4   5   19.41    0.91
   7   4  -5    0.75    0.19
   7   4  -5    0.57    0.15
  -7  -4   5    0.74    0.26
  -7  -4   5    0.86    0.22
  -7  -4   5    0.65    0.18
   6   4  -5   -0.09    0.13
   6   4  -5    0.06    0.10
  -6  -4   5   -0.18    0.12
  -6  -4   5   -0.10    0.14
   5   4  -5    8.60    0.43
   5   4  -5    8.15    0.47
   4   4  -5   65.07    2.13
   4   4  -5   64.01    2.18
  -4  -4   5   64.94    2.20
   3   4  -5    0.14    0.10
   3   4  -5   -0.09    0.06
  -3  -4   5   -0.07    0.08
   2   4  -5    6.76    0.33
   2   4  -5    6.54    0.39
  -2  -4   5    6.88    0.39
   1   4  -5    0.17    0.08
  -1  -4   5    0.15    0.11
   0   4  -5   39.60    1.34
   0   4  -5   39.77    1.38
   0  -4   5   40.87    1.39
  -1   4  -5  126.67    3.72
  -1   4  -5  121.76    3.78
   1  -4   5  113.03    3.78
   1  -4   5  117.17    3.84
  -2   4  -5   10.89    0.46
  -2   4  -5   10.07    0.43
   2  -4   5   11.26    0.55
   2  -4   5   10.85    0.48
  -3   4  -5   15.89    0.61
  -3   4  -5   15.30    0.60
   3  -4   5   15.67    0.72
   3  -4   5   14.25    0.60
  -4   4  -5    2.64    0.20
  -4   4  -5    2.50    0.21
   4  -4   5    2.20    0.16
  -5   4  -5    1.64    0.19
  -5   4  -5    1.56    0.18
   5  -4   5    1.95    0.18
   5  -4   5    2.49    0.35
  -6   4  -5    0.31    0.13
   6  -4   5    0.29    0.11
   6  -4   5    0.18    0.19
  -7   4  -5   15.19    0.69
  -7   4  -5   14.37    0.66
   7  -4   5   15.61    0.88
   7  -4   5   16.14    0.71
  -8   4  -5    1.56    0.27
  -8   4  -5    1.51    0.23
  -8   4  -5    2.04    0.27
   8  -4   5    0.96    0.32
   8  -4   5    2.47    0.34
  -9   4  -5    1.22    0.23
  -9   4  -5    1.02    0.20
  -9   4  -5    0.98    0.26
   9  -4   5    1.16    0.25
   9  -4   5    1.06    0.40
 -10   4  -5    2.67    0.32
 -10   4  -5    2.94    0.29
 -10   4  -5    2.32    0.40
  10  -4   5    2.56    0.53
  10  -4   5    2.71    0.36
  11  -4   5    1.07    0.54
  12   3  -5    0.24    0.29
 -12  -3   5   -0.54    0.47
 -12  -3   5   -0.04    0.35
 -12  -3   5    0.53    0.32
  11   3  -5   -0.17    0.23
 -11  -3   5    0.05    0.29
 -11  -3   5    0.83    0.37
 -11  -3   5    0.01    0.27
 -10  -3   5    2.97    0.41
 -10  -3   5    2.70    0.40
 -10  -3   5    3.22    0.40
   9   3  -5    2.82    0.38
   9   3  -5    3.05    0.24
  -9  -3   5    2.90    0.37
  -9  -3   5    3.18    0.41
  -9  -3   5    3.22    0.47
  -9  -3   5    2.93    0.40
   8   3  -5   24.25    1.00
  -8  -3   5   23.66    1.02
  -8  -3   5   24.03    1.03
  -8  -3   5   24.18    1.04
  -8  -3   5   24.63    1.02
   7   3  -5   29.85    1.16
   7   3  -5   29.49    1.14
  -7  -3   5   29.11    1.16
  -7  -3   5   30.88    1.19
  -7  -3   5   29.50    1.17
  -7  -3   5   29.98    1.18
   6   3  -5    5.28    0.34
   6   3  -5    5.33    0.38
  -6  -3   5    5.24    0.39
  -6  -3   5    5.25    0.36
  -6  -3   5    4.81    0.40
   5   3  -5    0.44    0.11
   5   3  -5    0.08    0.12
  -5  -3   5    0.10    0.18
  -5  -3   5    0.42    0.13
   4   3  -5   11.41    0.54
   4   3  -5   12.17    0.52
  -4  -3   5   11.59    0.52
  -4  -3   5   11.75    0.56
   3   3  -5    3.03    0.27
   3   3  -5    2.80    0.21
  -3  -3   5    2.86    0.26
  -3  -3   5    2.74    0.19
   2   3  -5   19.93    0.77
   2   3  -5   20.54    0.74
  -2  -3   5   19.37    0.72
   1   3  -5   41.48    1.35
  -1  -3   5   34.06    1.30
  -1  -3   5   41.19    1.36
   0   3  -5   56.58    1.80
   0   3  -5   54.56    1.82
   0  -3   5   55.77    1.83
   0  -3   5   52.69    1.82
  -1   3  -5    1.32    0.15
   1  -3   5    1.24    0.17
   1  -3   5    1.12    0.16
  -2   3  -5   80.08    2.61
  -2   3  -5   80.47    2.56
   2  -3   5   85.81    2.57
   2  -3   5   80.08    2.62
  -3   3  -5    5.19    0.30
  -3   3  -5    5.97    0.30
   3  -3   5    5.73    0.32
   3  -3   5    6.31    0.27
   3  -3   5    5.58    0.38
  -4   3  -5    0.25    0.09
  -4   3  -5    0.25    0.09
   4  -3   5    0.32    0.09
   4  -3   5    0.23    0.12
  -5   3  -5    3.98    0.26
  -5   3  -5    3.85    0.27
   5  -3   5    3.79    0.25
  -6   3  -5   27.12    1.05
  -6   3  -5   30.14    1.00
   6  -3   5   29.38    1.08
   6  -3   5   28.64    1.20
  -7   3  -5    5.99    0.39
   7  -3   5    7.04    0.42
   7  -3   5    5.34    0.51
  -8   3  -5   14.36    0.65
  -8   3  -5   14.00    0.68
   8  -3   5   15.65    0.71
   8  -3   5   15.16    0.87
  -9   3  -5    8.95    0.43
  -9   3  -5    9.14    0.57
  -9   3  -5    9.34    0.52
   9  -3   5   10.39    0.77
   9  -3   5   10.37    0.59
 -10   3  -5    0.45    0.27
 -10   3  -5    0.28    0.22
  10  -3   5   -0.24    0.36
  10  -3   5    0.05    0.23
 -11   3  -5    1.03    0.28
  11  -3   5    0.66    0.27
  11  -3   5    0.25    0.51
  12  -3   5    0.37    0.38
  12   2  -5    0.06    0.31
 -12  -2   5   -0.14    0.36
 -12  -2   5   -0.16    0.32
  11   2  -5    0.62    0.27
 -11  -2   5    1.22    0.30
 -11  -2   5    1.16    0.38
 -11  -2   5    1.60    0.40
  10   2  -5    1.62    0.27
 -10  -2   5    1.92    0.36
 -10  -2   5    2.58    0.35
 -10  -2   5    1.54    0.35
   9   2  -5    0.19    0.19
  -9  -2   5    0.18    0.23
  -9  -2   5    0.35    0.26
  -9  -2   5    0.24    0.23
  -9  -2   5    0.29    0.22
   8   2  -5   10.56    0.61
   8   2  -5   11.41    0.59
  -8  -2   5   10.44    0.60
  -8  -2   5   11.70    0.63
  -8  -2   5   11.46    0.64
  -8  -2   5   10.68    0.60
   7   2  -5    0.02    0.14
   7   2  -5    0.01    0.11
  -7  -2   5   -0.21    0.15
  -7  -2   5   -0.03    0.18
  -7  -2   5   -0.08    0.19
   6   2  -5    6.38    0.39
   6   2  -5    6.76    0.41
  -6  -2   5    6.94    0.44
  -6  -2   5    6.72    0.45
  -6  -2   5    6.60    0.41
  -6  -2   5    6.92    0.44
   5   2  -5    2.69    0.25
   5   2  -5    2.23    0.22
  -5  -2   5    2.43    0.26
  -5  -2   5    2.22    0.24
  -5  -2   5    2.60    0.27
  -5  -2   5    2.27    0.28
   4   2  -5    0.07    0.08
   4   2  -5   -0.09    0.07
  -4  -2   5    0.02    0.08
  -4  -2   5    0.03    0.12
  -4  -2   5    0.10    0.10
  -4  -2   5    0.00    0.14
   3   2  -5    9.61    0.46
   3   2  -5    9.47    0.43
  -3  -2   5    9.33    0.48
  -3  -2   5    8.83    0.45
   2   2  -5   39.93    1.37
   2   2  -5   41.32    1.34
  -2  -2   5   39.08    1.30
  -2  -2   5   39.18    1.37
  -1  -2   5   13.28    0.55
  -1  -2   5   12.64    0.51
   0   2  -5   52.32    1.72
   0   2  -5   55.52    1.74
   0   2  -5   52.31    1.73
   0  -2   5   50.21    1.72
   0  -2   5   51.51    1.74
  -1   2  -5    0.98    0.12
  -1   2  -5    0.63    0.10
  -1   2  -5    0.86    0.13
   1  -2   5    0.62    0.11
   1  -2   5    0.60    0.11
  -2   2  -5    0.18    0.09
  -2   2  -5    0.08    0.06
  -2   2  -5   -0.05    0.07
   2  -2   5    0.12    0.06
   2  -2   5    0.08    0.10
   2  -2   5    0.06    0.07
  -3   2  -5    9.97    0.48
  -3   2  -5    9.85    0.42
  -3   2  -5    9.90    0.43
   3  -2   5   10.70    0.45
   3  -2   5    8.59    0.51
   3  -2   5   10.64    0.42
  -4   2  -5    6.60    0.34
  -4   2  -5    6.87    0.34
  -4   2  -5    6.38    0.39
   4  -2   5    7.25    0.33
   4  -2   5    6.57    0.42
  -5   2  -5    0.07    0.09
  -5   2  -5   -0.07    0.11
  -5   2  -5    0.05    0.10
   5  -2   5    0.00    0.12
   5  -2   5    0.12    0.07
   5  -2   5   -0.07    0.08
  -6   2  -5   23.92    0.99
  -6   2  -5   24.30    0.87
  -6   2  -5   23.09    0.92
   6  -2   5   24.98    0.93
  -7   2  -5   15.79    0.77
  -7   2  -5   16.41    0.64
  -7   2  -5   16.00    0.69
   7  -2   5   15.79    0.70
   7  -2   5   15.76    0.81
  -8   2  -5   15.90    0.73
  -8   2  -5   15.63    0.68
  -8   2  -5   16.73    0.66
   8  -2   5   16.88    0.76
   8  -2   5   16.41    0.88
  -9   2  -5    1.60    0.26
  -9   2  -5    1.95    0.20
  -9   2  -5    2.10    0.27
   9  -2   5    2.80    0.34
   9  -2   5    1.70    0.35
 -10   2  -5    7.52    0.58
 -10   2  -5    8.42    0.51
  10  -2   5    8.59    0.55
  10  -2   5    8.43    0.77
 -11   2  -5    1.61    0.28
  11  -2   5    0.71    0.51
  11  -2   5    1.73    0.31
 -12   2  -5   -0.21    0.27
  12  -2   5    0.02    0.31
  12  -2   5   -0.24    0.56
 -12  -1   5    0.08    0.38
 -12  -1   5    0.34    0.34
  11   1  -5    1.40    0.31
 -11  -1   5    1.31    0.34
 -11  -1   5    1.23    0.29
 -11  -1   5    0.80    0.40
  10   1  -5    0.17    0.21
 -10  -1   5    0.31    0.24
 -10  -1   5   -0.08    0.29
 -10  -1   5    0.02    0.27
   9   1  -5    0.81    0.23
  -9  -1   5    1.28    0.27
  -9  -1   5    1.51    0.30
  -9  -1   5    1.53    0.30
  -9  -1   5    0.97    0.26
   8   1  -5    7.37    0.32
   8   1  -5    7.72    0.49
   8   1  -5    8.20    0.48
  -8  -1   5    9.16    0.55
  -8  -1   5    8.71    0.53
  -8  -1   5    7.47    0.53
   7   1  -5   -0.16    0.12
   7   1  -5    0.09    0.12
   7   1  -5   -0.02    0.11
  -7  -1   5    0.13    0.15
  -7  -1   5    0.07    0.15
  -7  -1   5    0.00    0.18
  -7  -1   5   -0.17    0.18
   6   1  -5    0.17    0.12
   6   1  -5    0.13    0.10
  -6  -1   5    0.26    0.14
  -6  -1   5    0.25    0.12
  -6  -1   5    0.15    0.16
  -6  -1   5    0.05    0.18
   5   1  -5   34.67    1.23
   5   1  -5   34.82    1.24
  -5  -1   5   33.55    1.24
  -5  -1   5   34.47    1.28
  -5  -1   5   34.53    1.24
  -5  -1   5   34.29    1.28
   4   1  -5    1.69    0.18
   4   1  -5    1.79    0.21
  -4  -1   5    1.63    0.20
  -4  -1   5    2.00    0.23
  -4  -1   5    1.95    0.24
  -4  -1   5    1.96    0.28
   3   1  -5   35.32    1.23
   3   1  -5   36.04    1.21
  -3  -1   5   35.49    1.25
  -3  -1   5   33.24    1.23
  -3  -1   5   35.56    1.29
   2   1  -5    4.38    0.25
  -2  -1   5    4.42    0.27
  -2  -1   5    4.53    0.28
   1   1  -5  207.49    6.26
   1   1  -5  203.26    6.32
  -1  -1   5  203.64    6.27
  -1  -1   5  201.82    6.33
   0   1  -5  165.75    5.31
   0   1  -5  184.36    5.34
   0   1  -5  171.79    5.29
   0  -1   5  165.96    5.31
   0  -1   5  166.47    5.30
  -1   1  -5   74.95    2.52
  -1   1  -5   77.53    2.51
  -1   1  -5   84.13    2.52
   1  -1   5   75.01    2.51
   1  -1   5   75.44    2.53
   1  -1   5   84.05    2.52
  -2   1  -5  103.57    3.14
  -2   1  -5  102.19    3.15
   2  -1   5  105.82    3.15
   2  -1   5   95.85    3.19
   2  -1   5   90.35    3.14
  -3   1  -5    6.85    0.39
  -3   1  -5    7.89    0.37
  -3   1  -5    8.19    0.35
   3  -1   5    8.34    0.36
  -4   1  -5    9.09    0.48
  -4   1  -5    9.09    0.42
   4  -1   5    9.61    0.44
  -5   1  -5   12.14    0.52
  -5   1  -5   12.00    0.60
  -5   1  -5   12.74    0.53
   5  -1   5   13.38    0.54
   5  -1   5   12.79    0.63
  -6   1  -5    7.64    0.39
  -6   1  -5    7.33    0.39
  -6   1  -5    7.12    0.45
   6  -1   5    7.35    0.48
   6  -1   5    7.35    0.39
  -7   1  -5    8.36    0.43
  -7   1  -5    8.46    0.44
  -7   1  -5    7.56    0.49
   7  -1   5    8.27    0.57
   7  -1   5    9.09    0.45
  -8   1  -5   11.80    0.65
  -8   1  -5   11.82    0.58
  -8   1  -5   11.82    0.56
  -8   1  -5   11.61    0.52
   8  -1   5   12.06    0.58
   8  -1   5   12.32    0.70
  -9   1  -5   14.02    0.63
  -9   1  -5   14.72    0.64
  -9   1  -5   14.47    0.74
  -9   1  -5   13.41    0.69
   9  -1   5   14.30    0.73
   9  -1   5   14.12    0.82
 -10   1  -5    0.23    0.19
 -10   1  -5    0.15    0.22
 -10   1  -5    0.10    0.19
 -10   1  -5   -0.16    0.17
 -10   1  -5    0.26    0.15
  10  -1   5    0.24    0.18
  10  -1   5    0.09    0.32
 -11   1  -5    4.83    0.42
  11  -1   5    5.40    0.63
  11  -1   5    4.55    0.48
 -12   1  -5    1.51    0.33
  12  -1   5    2.25    0.35
  12  -1   5    1.62    0.51
 -13   1  -5   -0.03    0.31
  13  -1   5    0.20    0.65
  13  -1   5    1.06    0.38
  11   0  -5   -0.38    0.27
 -11   0   5    0.51    0.30
  10   0  -5    0.23    0.23
 -10   0   5    0.67    0.28
 -10   0   5    0.46    0.30
   9   0  -5   -0.19    0.18
  -9   0   5   -0.11    0.22
  -9   0   5    0.21    0.24
  -9   0   5    0.11    0.24
  -9   0   5    0.60    0.30
   8   0  -5    1.62    0.23
   8   0  -5    0.95    0.21
  -8   0   5    1.71    0.30
  -8   0   5    1.66    0.32
  -8   0   5    1.65    0.26
   7   0  -5   11.92    0.57
   7   0  -5    9.42    0.44
   7   0  -5   11.97    0.59
  -7   0   5   11.08    0.57
  -7   0   5   11.66    0.62
  -7   0   5   11.59    0.62
  -7   0   5   12.26    0.62
   6   0  -5    2.39    0.22
   6   0  -5    2.79    0.27
   6   0  -5    2.64    0.26
  -6   0   5    2.47    0.30
  -6   0   5    2.70    0.31
  -6   0   5    2.27    0.28
  -6   0   5    2.43    0.30
   5   0  -5   15.60    0.64
   5   0  -5   15.22    0.66
  -5   0   5   15.01    0.70
  -5   0   5   16.05    0.68
  -5   0   5   16.67    0.71
  -5   0   5   15.66    0.69
   4   0  -5   50.92    1.66
   4   0  -5   48.34    1.66
  -4   0   5   50.08    1.72
  -4   0   5   49.79    1.68
  -4   0   5   47.32    1.66
  -4   0   5   48.94    1.72
   3   0  -5    1.75    0.18
   3   0  -5    1.51    0.19
  -3   0   5    1.73    0.22
  -3   0   5    1.14    0.16
  -3   0   5    1.33    0.18
  -3   0   5    1.37    0.17
   2   0  -5   13.49    0.53
   2   0  -5   13.47    0.54
  -2   0   5   13.61    0.57
  -2   0   5   14.02    0.60
  -2   0   5   12.06    0.54
   1   0  -5  168.03    5.08
   1   0  -5  159.66    5.13
  -1   0   5  164.60    5.15
  -1   0   5  160.45    5.14
  -1   0   5  168.82    5.08
  -1   0   5  169.07    5.20
   0   0  -5  169.11    5.14
   0   0  -5  161.76    5.16
   0   0  -5  164.74    5.20
   0   0   5  169.73    5.16
   0   0   5  159.62    5.17
   0   0   5  171.72    5.15
  -1   0  -5    0.07    0.07
  -1   0  -5    0.04    0.06
  -1   0  -5    0.09    0.08
   1   0   5    0.11    0.08
   1   0   5    0.03    0.06
   1   0   5    0.00    0.07
  -2   0  -5    0.42    0.09
[truncated: 725,815 more chars]
